# Supplementary material for: Quantitative-Proteomic Comparison of Alpha and Beta Cells to Uncover Novel Targets for Lineage Reprogramming
Source: PLoS One. 2014 Apr 23;9(4):e95194. doi: 10.1371/journal.pone.0095194 (PMC3997365; doi:10.1371/journal.pone.0095194)
Supplement: File S4 — Total proteomic data comparing αTC and βTC cells. (XLS) [file pone.0095194.s004.xls]

## Sheet: Proteins_bTC3-aTC1
Leading Protein ID	Protein IDs	Protein Names	Gene Names	Protein Descriptions	Unique Peptides	Unique Peptides Replicate 1	Unique Peptides Replicate 2	median betaTC3/alphaTC1 protein SILAC ratio (log2) [median over all replicates]	p-value	betaTC3/alphaTC1 SILAC ratio (log2) Replicate 1 [median of all L/H peptide ratios for this protein group]	betaTC3/alphaTC1 SILAC ratio (log2) Replicate 2 [median of all H/M peptide ratios for this protein group]	betaTC3/alphaTC1 SILAC ratio (log2) Replicate 1 [median of all peptide ratios for this protein group derived from (L/M)/(2-( L/M)) and (-1) + 2/ (H/M)]	betaTC3/alphaTC1 SILAC ratio (log2) Replicate 2 [median of all peptide ratios for this protein group derived from (H/L)/(2-(H/L)) and (-1) + 2/ (M/L)]	Total Ratio Count Replicate 1	Total Ratio Count Replicate 2	Uniprot	Uniprot Name	ENSEMBL	VEGA	MGI	REFSEQ	Pfam	Pfam Names	Pfam Descriptions	GOCC	GOCC Names	GOMF	GOMF Names	GOBP	GOBP Names	KEGG	KEGG Pathways	KEGG Pathway Names	KEGG Ortholog	Mol. Weight [kDa]	Sequence Length
IPI00854971	IPI00854971			similar to Protein disulfide isomerase associated 6	2	2	2	-4.71198	3.42261e-09	-4.83876	-4.57159	-4.5852	-4.85655	45	27						XP_001476035														42.857	391
IPI00139278	IPI00139278;IPI00757037;IPI00954307;IPI00954355;IPI00118720	Tescalcin	Tesc	Tescalcin;similar to Tescalcin;Tescalcin variant 3;Tescalcin variant 2	7	7	4	-4.59521	7.99734e-09	-3.62315	-5.63754	-3.73369	-5.45673	24	21	Q9JKL5;D0EM45;D0EM47;D0EM46	TESC_MOUSE	ENSMUST00000031304	OTTMUSP00000023573	MGI:1930803	NP_067319;XP_001477538	PF00036	efhand	EF hand	GO:0001726;GO:0005634;GO:0005737;GO:0030027;GO:0042995;GO:0043226;GO:0043227;GO:0043229;GO:0043231;GO:0044424;GO:0044464	ruffle;nucleus;cytoplasm;lamellipodium;cell projection;organelle;membrane-bounded organelle;intracellular organelle;intracellular membrane-bounded organelle;intracellular part;cell part	GO:0000287;GO:0004857;GO:0005488;GO:0005509;GO:0019208;GO:0019212;GO:0019888;GO:0030234;GO:0043167;GO:0043169;GO:0046872	magnesium ion binding;enzyme inhibitor activity;binding;calcium ion binding;phosphatase regulator activity;phosphatase inhibitor activity;protein phosphatase regulator activity;enzyme regulator activity;ion binding;cation binding;metal ion binding			mmu:57816				24.599	214
IPI00323748	IPI00323748;IPI00404017;IPI00473940	Erythrocyte band 7 integral membrane protein;Stomatin;Protein 7.2b;Putative uncharacterized protein	Stom;Epb7.2;Epb72	Erythrocyte band 7 integral membrane protein;Putative uncharacterized protein	6	5	3	-4.31443	5.66671e-08	-3.27096	-6.12218	-1.90954	-5.35789	60	42	P54116;A2AL38;Q8BPA1	STOM_MOUSE;Q8BPA1_MOUSE	ENSMUST00000028241;ENSMUST00000070938	OTTMUSP00000013019	MGI:95403;MGI:95403	NP_038543	PF01145	Band_7	SPFH domain / Band 7 family	GO:0005856;GO:0005887;GO:0016021;GO:0016023;GO:0031224;GO:0031226;GO:0031410;GO:0031982;GO:0031988;GO:0042470;GO:0043226;GO:0043227;GO:0043228;GO:0043229;GO:0043231;GO:0043232;GO:0044424;GO:0044425;GO:0044444;GO:0044459;GO:0044464;GO:0045121;GO:0048770;GO:0016020	cytoskeleton;integral to plasma membrane;integral to membrane;cytoplasmic membrane-bounded vesicle;intrinsic to membrane;intrinsic to plasma membrane;cytoplasmic vesicle;vesicle;membrane-bounded vesicle;melanosome;organelle;membrane-bounded organelle			GO:0006461;GO:0010926;GO:0016043;GO:0022607;GO:0043933;GO:0051259;GO:0051260;GO:0065003	protein complex assembly;anatomical structure formation;cellular component organization;cellular component assembly;macromolecular complex subunit organization;protein oligomerization;protein homooligomerization;macromolecular complex assembly	mmu:13830				31.375	284
IPI00111908	IPI00111908	Carbamoyl-phosphate synthase [ammonia], mitochondrial;Carbamoyl-phosphate synthetase I	Cps1	Carbamoyl-phosphate synthase [ammonia], mitochondrial	24	23	20	-4.27528	7.3767e-08	-3.9742	-4.57637	-2.77623	-4.62709	294	138	Q8C196;Q561M8	CPSM_MOUSE	ENSMUST00000027144	OTTMUSP00000032759	MGI:891996	NP_001074278	PF00289;PF02786;PF02787;PF00988;PF00117;PF02142	CPSase_L_chain;CPSase_L_D2;CPSase_L_D3;CPSase_sm_chain;GATase;MGS	Carbamoyl-phosphate synthase L chain, N-terminal domain;Carbamoyl-phosphate synthase L chain, ATP binding domain;Carbamoyl-phosphate synthetase large chain, oligomerisation domain;Carbamoyl-phosphate synthase small chain, CPSase domain;Glutamine amidotransferase class-I;MGS-like domain	GO:0005739;GO:0043226;GO:0043227;GO:0043229;GO:0043231;GO:0044424;GO:0044444;GO:0044464	mitochondrion;organelle;membrane-bounded organelle;intracellular organelle;intracellular membrane-bounded organelle;intracellular part;cytoplasmic part;cell part	GO:0000166;GO:0001882;GO:0001883;GO:0003824;GO:0004086;GO:0004087;GO:0005488;GO:0005524;GO:0016874;GO:0016879;GO:0017076;GO:0030554;GO:0032553;GO:0032555;GO:0032559	nucleotide binding;nucleoside binding;purine nucleoside binding;catalytic activity;carbamoyl-phosphate synthase activity;carbamoyl-phosphate synthase (ammonia) activity;binding;ATP binding;ligase activity;ligase activity, forming carbon-nitrogen bonds	GO:0000050;GO:0006082;GO:0006519;GO:0006520;GO:0006541;GO:0006807;GO:0008152;GO:0009058;GO:0009064;GO:0009308;GO:0009987;GO:0019627;GO:0019752;GO:0034641;GO:0042180;GO:0043436;GO:0043603;GO:0043604;GO:0044106;GO:0044237;GO:0044238;GO:0044249;GO:0044271	urea cycle;organic acid metabolic process;cellular amino acid and derivative metabolic process;cellular amino acid metabolic process;glutamine metabolic process;nitrogen compound metabolic process;metabolic process;biosynthetic process	mmu:227231	ko00910;ko00251;ko00330	Nitrogen metabolism;Glutamate metabolism;Arginine and proline metabolism	K01948	164.62	1500
IPI00135645	IPI00135645;IPI00754533	Glucagon;Glicentin;Glicentin-related polypeptide;Oxyntomodulin;Glucagon-like peptide 1;Glucagon-like peptide 1(7-37);Glucagon-like peptide 1(7-36);Glucagon-like peptide 2	Gcg;RP23-343C17.3-002	Glucagon;Glucagon	18	18	18	-4.20825	1.15266e-07	-4.17785	-5.24892	-2.47469	-4.23864	63	53	P55095;A2AS85;A2AS86	GLUC_MOUSE;A2AS86_MOUSE	ENSMUST00000102733	OTTMUSP00000013741;OTTMUSP00000013742	MGI:95674;MGI:95674	NP_032126	PF00123	Hormone_2	Peptide hormone	GO:0005576	extracellular region	GO:0005102;GO:0005179;GO:0005488;GO:0005515	receptor binding;hormone activity;binding;protein binding	GO:0002791;GO:0010646;GO:0032879;GO:0046883;GO:0050789;GO:0050794;GO:0050796;GO:0051046;GO:0051049;GO:0060341;GO:0065007	regulation of peptide secretion;regulation of cell communication;regulation of localization;regulation of hormone secretion;regulation of biological process;regulation of cellular process;regulation of insulin secretion;regulation of secretion	mmu:14526	ko04080	Neuroactive ligand-receptor interaction	K05259	20.906	180
IPI00775950	IPI00775950;IPI00122450;IPI00311344;IPI00775997;IPI00462119;IPI00758267;IPI00757635;IPI00776094;IPI00754268;REV_IPI00555143;REV_IPI00224775	Putative uncharacterized protein	Cald1	62 kDa protein;caldesmon 1;89 kDa protein;63 kDa protein;62 kDa protein	12	11	8	-4.17643	1.4213e-07	-3.84917	-4.5037	-2.61958	-4.51933	108	90	Q3TUS1;Q3UGC3;Q8VCQ8	Q3TUS1_MOUSE	ENSMUST00000045191;ENSMUST00000115021;ENSMUST00000115025	OTTMUSP00000018676;OTTMUSP00000015674;OTTMUSP00000018674;OTTMUSP00000018675;OTTMUSP00000015675	MGI:88250	NP_663550	PF02029	Caldesmon	Caldesmon	GO:0000267;GO:0005624;GO:0005626;GO:0030478;GO:0044422;GO:0044424;GO:0044430;GO:0044444;GO:0044446;GO:0044448;GO:0044464	cell fraction;membrane fraction;insoluble fraction;actin cap;organelle part;intracellular part;cytoskeletal part;cytoplasmic part;intracellular organelle part;cell cortex part;cell part	GO:0003779;GO:0005488;GO:0005515;GO:0008092	actin binding;binding;protein binding;cytoskeletal protein binding	GO:0006937;GO:0006940;GO:0044057;GO:0050789;GO:0051239;GO:0065007	regulation of muscle contraction;regulation of smooth muscle contraction;regulation of system process;regulation of biological process;regulation of multicellular organismal process;biological regulation	mmu:109624	ko04270	Vascular smooth muscle contraction	K12327	61.836	536
IPI00330094	IPI00330094	Carnitine O-palmitoyltransferase 1, liver isoform;Carnitine O-palmitoyltransferase I, liver isoform;Carnitine palmitoyltransferase 1A	Cpt1a;Cpt-1;Cpt1	Carnitine O-palmitoyltransferase 1, liver isoform	2	2	1	-4.03034	3.64923e-07	-3.81378	-5.53818	-3.87003	-4.19065	156	96	P97742;A8ASF5;Q3UGT1;Q7TQD5	CPT1A_MOUSE	ENSMUST00000025835		MGI:1098296	NP_038523	PF00755	Carn_acyltransf	Choline/Carnitine o-acyltransferase	GO:0005741;GO:0005743;GO:0016020;GO:0016021;GO:0019866;GO:0019867;GO:0031090;GO:0031224;GO:0031966;GO:0031968;GO:0044422;GO:0044424;GO:0044425;GO:0044429;GO:0044444;GO:0044446;GO:0044464	mitochondrial outer membrane;mitochondrial inner membrane;membrane;integral to membrane;organelle inner membrane;outer membrane;organelle membrane;intrinsic to membrane;mitochondrial membrane;organelle outer membrane;organelle part;intracellular part	GO:0003824;GO:0004095;GO:0008374;GO:0008415;GO:0016406;GO:0016409;GO:0016416;GO:0016740;GO:0016746;GO:0016747	catalytic activity;carnitine O-palmitoyltransferase activity;O-acyltransferase activity;acyltransferase activity;carnitine O-acyltransferase activity;palmitoyltransferase activity;O-palmitoyltransferase activity;transferase activity	GO:0006082;GO:0006629;GO:0006631;GO:0006810;GO:0008152;GO:0009987;GO:0019752;GO:0032787;GO:0042180;GO:0043436;GO:0044237;GO:0044238;GO:0044255;GO:0051234	organic acid metabolic process;lipid metabolic process;fatty acid metabolic process;transport;metabolic process;cellular process;carboxylic acid metabolic process;monocarboxylic acid metabolic process;cellular ketone metabolic process	mmu:12894	ko00071;ko04920;ko03320	Fatty acid metabolism;Adipocytokine signaling pathway;PPAR signaling pathway	K08765	88.25	773
IPI00123190	IPI00123190;IPI00229690	Adenylosuccinate synthetase isozyme 1;Adenylosuccinate synthetase, muscle isozyme;IMP--aspartate ligase 1	Adssl1;Adss1	Isoform 1 of Adenylosuccinate synthetase isozyme 1;Isoform 2 of Adenylosuccinate synthetase isozyme 1	11	11	9	-3.80572	1.46281e-06	-3.55536	-4.05607	-2.95311	-4.51378	63	51	P28650-1;P28650;Q3UBP0;P28650-2	PURA1_MOUSE	ENSMUST00000021726;ENSMUST00000109756		MGI:87947;MGI:87947	NP_031447	PF00709	Adenylsucc_synt	Adenylosuccinate synthetase	GO:0005737;GO:0016020;GO:0044424;GO:0044464	cytoplasm;membrane;intracellular part;cell part	GO:0000166;GO:0000287;GO:0003824;GO:0004019;GO:0005488;GO:0005515;GO:0005525;GO:0016874;GO:0016879;GO:0017076;GO:0019001;GO:0032553;GO:0032555;GO:0032561;GO:0043167;GO:0043169;GO:0046872	nucleotide binding;magnesium ion binding;catalytic activity;adenylosuccinate synthase activity;binding;protein binding;GTP binding;ligase activity;ligase activity, forming carbon-nitrogen bonds;purine nucleotide binding;guanyl nucleotide binding	GO:0006139;GO:0006163;GO:0006164;GO:0006753;GO:0006807;GO:0008152;GO:0009058;GO:0009117;GO:0009165;GO:0009987;GO:0044237;GO:0044238;GO:0044249;GO:0046483;GO:0055086	nucleobase, nucleoside, nucleotide and nucleic acid metabolic process;purine nucleotide metabolic process;purine nucleotide biosynthetic process;nucleoside phosphate metabolic process;nitrogen compound metabolic process;metabolic process	mmu:11565	ko00230;ko00252	Purine metabolism;Alanine and aspartate metabolism	K01939	50.254	457
IPI00224181	IPI00224181	Aldose reductase-related protein 1;Aldehyde reductase;Aldo-keto reductase family 1 member B7;Vas deferens androgen-dependent protein;MVDP	Akr1b7;Avdp	Aldose reductase-related protein 1	4	3	3	-3.61447	4.5002e-06	-4.03138	-2.56511	-3.19756	-4.04259	12	6	P21300;Q3UGS8;Q5M9J9	ALD1_MOUSE	ENSMUST00000007449	OTTMUSP00000015662	MGI:101918	NP_033861	PF00248	Aldo_ket_red	Aldo/keto reductase family	GO:0005737;GO:0044424;GO:0044464	cytoplasm;intracellular part;cell part	GO:0003824;GO:0004032;GO:0004033;GO:0016491;GO:0016614;GO:0016616	catalytic activity;aldehyde reductase activity;aldo-keto reductase activity;oxidoreductase activity;oxidoreductase activity, acting on CH-OH group of donors;oxidoreductase activity, acting on the CH-OH group of donors, NAD or NADP as acceptor	GO:0006629;GO:0008152;GO:0009987;GO:0044237;GO:0044238;GO:0044255;GO:0055114	lipid metabolic process;metabolic process;cellular process;cellular metabolic process;primary metabolic process;cellular lipid metabolic process;oxidation reduction	mmu:11997	ko00040;ko00051;ko00052;ko00620;ko00561	Pentose and glucuronate interconversions;Fructose and mannose metabolism;Galactose metabolism;Pyruvate metabolism;Glycerolipid metabolism	K00011	35.988	316
IPI00113073	IPI00113073	Aldehyde dehydrogenase X, mitochondrial;Aldehyde dehydrogenase family 1 member B1	Aldh1b1;Aldhx	Aldehyde dehydrogenase X, mitochondrial	6	5	5	-3.56332	6.02289e-06	-3.34649	-4.18056	-3.78015	-1.94519	72	45	Q9CZS1;B1AWX7	AL1B1_MOUSE	ENSMUST00000044384	OTTMUSP00000007139	MGI:1919785	NP_082546	PF00171	Aldedh	Aldehyde dehydrogenase family	GO:0005759;GO:0044422;GO:0044424;GO:0044429;GO:0044444;GO:0044446;GO:0044464	mitochondrial matrix;organelle part;intracellular part;mitochondrial part;cytoplasmic part;intracellular organelle part;cell part	GO:0003824;GO:0004029;GO:0016491;GO:0016620;GO:0016903	catalytic activity;aldehyde dehydrogenase (NAD) activity;oxidoreductase activity;oxidoreductase activity, acting on the aldehyde or oxo group of donors, NAD or NADP as acceptor;oxidoreductase activity, acting on the aldehyde or oxo group of donors	GO:0008152;GO:0055114	metabolic process;oxidation reduction	mmu:72535	ko00010;ko00053;ko00620;ko00640;ko00650;ko00071;ko00561;ko00280;ko00310;ko00330;ko00340;ko00380;ko00410;ko00903;ko00641;ko00631	Glycolysis / Gluconeogenesis;Ascorbate and aldarate metabolism;Pyruvate metabolism;Propanoate metabolism;Butanoate metabolism;Fatty acid metabolism;Glycerolipid metabolism;Valine, leucine and isoleucine degradation;Lysine degradation;Arginine and proline metabolism;Histidine metabolism;Tryptophan metabolism;beta-Alanine metabolism;Limonene and pinene degradation;3-Chloroacrylic acid degradation;1…	K00128	57.552	519
IPI00323353	IPI00323353;IPI00649218;IPI00750037;IPI00230085	Uridine phosphorylase 1	Upp1;Up;Upp	Uridine phosphorylase 1	9	9	6	-3.52132	7.6297e-06	-3.83671	-2.98875	-3.73991	-3.30273	66	36	P52624;Q5SUC8	UPP1_MOUSE	ENSMUST00000020677;ENSMUST00000101525	OTTMUSP00000005353;OTTMUSP00000005354	MGI:1097668	NP_001152873;NP_001152874;NP_033503	PF01048	PNP_UDP_1	Phosphorylase superfamily	GO:0005737;GO:0044424;GO:0044464	cytoplasm;intracellular part;cell part	GO:0003824;GO:0004850;GO:0016740;GO:0016757;GO:0016763	catalytic activity;uridine phosphorylase activity;transferase activity;transferase activity, transferring glycosyl groups;transferase activity, transferring pentosyl groups	GO:0006139;GO:0006213;GO:0006220;GO:0006753;GO:0006807;GO:0008152;GO:0009056;GO:0009116;GO:0009117;GO:0009119;GO:0009166;GO:0009987;GO:0044237;GO:0044238;GO:0044248;GO:0046108;GO:0046131;GO:0046483;GO:0055086	nucleobase, nucleoside, nucleotide and nucleic acid metabolic process;pyrimidine nucleoside metabolic process;pyrimidine nucleotide metabolic process;nucleoside phosphate metabolic process;nitrogen compound metabolic process;metabolic process	mmu:22271	ko00240;ko00983	Pyrimidine metabolism;Drug metabolism - other enzymes	K00757	34.086	311
IPI00867880	IPI00867880	Purkinje cell protein 4-like protein 1	Pcp4l1	Purkinje cell protein 4-like protein 1	2	2	2	-3.51605	7.85785e-06	-4.63817	-3.08054	-3.95157	-2.30729	21	3	Q6W8Q3	PC4L1_MOUSE	ENSMUST00000045704;ENSMUST00000111332	OTTMUSP00000024193	MGI:1913675	NP_079833										mmu:66425				7.5023	68
IPI00316815	IPI00316815;IPI00468321	G patch domain-containing protein 4	Gpatch4;Gpatc4	Isoform 1 of G patch domain-containing protein 4	3	3	3	-3.45664	1.09266e-05	-2.78457	-4.1287	-2.75253	-4.70378	81	63	Q3TFK5-1;Q3TFK5	GPTC4_MOUSE	ENSMUST00000029707;ENSMUST00000050223		MGI:1913864	NP_001104279;NP_079939	PF01585	G-patch	G-patch domain	GO:0005622;GO:0044464	intracellular;cell part	GO:0003676;GO:0005488	nucleic acid binding;binding			mmu:66614				46.553	415
IPI00113529	IPI00113529;IPI00468276;IPI00928523;IPI00229125;IPI00110656	Gasdermin-A1;Gasdermin-1	Gsdma1;Gsdm;Gsdm1	Gasdermin-A1	3	3	3	-3.42361	1.30948e-05	-3.00489	-3.9717	-2.95542	-3.84233	9	9	Q9EST1	GSDA1_MOUSE	ENSMUST00000017348	OTTMUSP00000006755	MGI:1889509	NP_067322	PF04598	Gasdermin	Gasdermin family	GO:0044424;GO:0044444;GO:0044464;GO:0048471	intracellular part;cytoplasmic part;cell part;perinuclear region of cytoplasm			GO:0006915;GO:0006917;GO:0008219;GO:0009987;GO:0010941;GO:0010942;GO:0012501;GO:0012502;GO:0016265;GO:0042981;GO:0043065;GO:0043067;GO:0043068;GO:0048518;GO:0048522;GO:0050789;GO:0050793;GO:0050794;GO:0051094;GO:0065007	apoptosis;induction of apoptosis;cell death;cellular process;regulation of cell death;positive regulation of cell death;programmed cell death;induction of programmed cell death;death;regulation of apoptosis;positive regulation of apoptosis	mmu:57911				49.592	446
IPI00316495	IPI00316495;IPI00850126;IPI00850420	Ras-related protein Rab-3C	Rab3c	Ras-related protein Rab-3C;similar to RAB3C, member RAS oncogene family isoform 1;similar to RAB3C, member RAS oncogene family isoform 2	2	1	2	-3.42277	1.31553e-05	-3.11363	-3.7319	-3.06543	-3.90226	81	63	P62823;Q3TU26;Q542T7;Q920F0;Q9CXS2	RAB3C_MOUSE	ENSMUST00000022210		MGI:1914545	NP_076341;XP_001473460;XP_001473480	PF00071	Ras	Ras family	GO:0005886;GO:0008021;GO:0016020;GO:0016023;GO:0030135;GO:0030136;GO:0031410;GO:0031982;GO:0031988;GO:0043226;GO:0043227;GO:0043229;GO:0043231;GO:0044424;GO:0044444;GO:0044456;GO:0044464	plasma membrane;synaptic vesicle;membrane;cytoplasmic membrane-bounded vesicle;coated vesicle;clathrin-coated vesicle;cytoplasmic vesicle;vesicle;membrane-bounded vesicle;organelle;membrane-bounded organelle;intracellular organelle	GO:0000166;GO:0005488;GO:0005515;GO:0005525;GO:0017076;GO:0019001;GO:0032553;GO:0032555;GO:0032561	nucleotide binding;binding;protein binding;GTP binding;purine nucleotide binding;guanyl nucleotide binding;ribonucleotide binding;purine ribonucleotide binding;guanyl ribonucleotide binding	GO:0006810;GO:0007154;GO:0007165;GO:0007242;GO:0007264;GO:0009987;GO:0015031;GO:0017157;GO:0032879;GO:0045184;GO:0050789;GO:0050794;GO:0051046;GO:0051049;GO:0051234;GO:0060341;GO:0060627;GO:0065007	transport;cell communication;signal transduction;intracellular signaling cascade;small GTPase mediated signal transduction;cellular process;protein transport;regulation of exocytosis;regulation of localization;establishment of protein localization	mmu:67295			K07883	25.872	227
IPI00228630	IPI00228630;IPI00885722;IPI00928493	Fructose-1,6-bisphosphatase 1;D-fructose-1,6-bisphosphate 1-phosphohydrolase 1	Fbp1;Fbp	Fructose-1,6-bisphosphatase 1	6	6	3	-3.40312	1.46395e-05	-3.59289	-4.038	-2.34502	-3.21335	66	63	Q9QXD6;Q9JHT6;Q9JHT7;Q9JHT8;Q9QXA9;Q9QXB2;Q9QXC3;Q9QXC4;Q9QXC5	F16P1_MOUSE	ENSMUST00000092888	OTTMUSP00000032529	MGI:95492	NP_062268	PF00316	FBPase	Fructose-1-6-bisphosphatase	GO:0005739;GO:0043226;GO:0043227;GO:0043229;GO:0043231;GO:0044424;GO:0044444;GO:0044464	mitochondrion;organelle;membrane-bounded organelle;intracellular organelle;intracellular membrane-bounded organelle;intracellular part;cytoplasmic part;cell part	GO:0000287;GO:0003824;GO:0005488;GO:0016787;GO:0016788;GO:0016791;GO:0019203;GO:0042132;GO:0042578;GO:0043167;GO:0043169;GO:0046872	magnesium ion binding;catalytic activity;binding;hydrolase activity;hydrolase activity, acting on ester bonds;phosphatase activity;carbohydrate phosphatase activity;fructose 1,6-bisphosphate 1-phosphatase activity;phosphoric ester hydrolase activity	GO:0005975;GO:0005996;GO:0006006;GO:0006066;GO:0006082;GO:0006090;GO:0006094;GO:0008152;GO:0009058;GO:0009987;GO:0016051;GO:0019318;GO:0019319;GO:0019752;GO:0032787;GO:0042180;GO:0043436;GO:0044237;GO:0044238;GO:0046165;GO:0046364	carbohydrate metabolic process;monosaccharide metabolic process;glucose metabolic process;alcohol metabolic process;organic acid metabolic process;pyruvate metabolic process;gluconeogenesis;metabolic process;biosynthetic process;cellular process	mmu:14121	ko00010;ko00030;ko00051;ko00710;ko04910	Glycolysis / Gluconeogenesis;Pentose phosphate pathway;Fructose and mannose metabolism;Carbon fixation in photosynthetic organisms;Insulin signaling pathway	K03841	36.912	338
IPI00331684	IPI00331684;IPI00473353;IPI00267579;IPI00127976;IPI00648471;IPI00648498;IPI00648782	Growth factor receptor-bound protein 10;GRB10 adapter protein;Growth factor receptor bound protein 10	Grb10;RP23-119N24.1-004;RP23-119N24.1-003	Isoform 1 of Growth factor receptor-bound protein 10;Isoform 2 of Growth factor receptor-bound protein 10;Growth factor receptor bound protein 10;Isoform 3 of Growth factor receptor-bound protein 10;Growth factor receptor bound protein 10	6	6	2	-3.40214	1.47179e-05	-3.17206	-3.63222	-2.95481	-6.49767	39	30	Q60760-1;Q60760;Q60760-2;Q5SUW3;Q60760-3;Q3TFU9;Q5SUW0	GRB10_MOUSE;Q5SUW3_MOUSE;Q5SUW0_MOUSE	ENSMUST00000078449;ENSMUST00000093321;ENSMUST00000109656;ENSMUST00000079913;ENSMUST00000109653	OTTMUSP00000005375;OTTMUSP00000005374;OTTMUSP00000005376;OTTMUSP00000005373	MGI:103232;MGI:103232;MGI:103232	NP_034475	PF08947;PF00169;PF00788;PF00017	BPS;PH;RA;SH2	BPS (Between PH and SH2);PH domain;Ras association (RalGDS/AF-6) domain;SH2 domain	GO:0005829;GO:0044424;GO:0044444;GO:0044464	cytosol;intracellular part;cytoplasmic part;cell part	GO:0004871;GO:0005070;GO:0005102;GO:0005158;GO:0005488;GO:0005515;GO:0030674;GO:0032403;GO:0060089;GO:0060090;GO:0004872	signal transducer activity;SH3/SH2 adaptor activity;receptor binding;insulin receptor binding;binding;protein binding;protein binding, bridging;protein complex binding;molecular transducer activity;molecular adaptor activity;receptor activity	GO:0007154;GO:0007165;GO:0007166;GO:0007167;GO:0007169;GO:0009966;GO:0009968;GO:0009987;GO:0010646;GO:0010648;GO:0010827;GO:0010829;GO:0032879;GO:0046324;GO:0046325;GO:0046626;GO:0046627;GO:0048009;GO:0048519;GO:0048523;GO:0048583;GO:0048585;GO:0050789;GO:0050794;GO:0051049;GO:0051051;GO:0065007	cell communication;signal transduction;cell surface receptor linked signal transduction;enzyme linked receptor protein signaling pathway;transmembrane receptor protein tyrosine kinase signaling pathway;regulation of signal transduction					70.584	621
IPI00109073	IPI00109073	Tubulin beta-4 chain	Tubb4	Tubulin beta-4 chain	5	5	5	-3.37989	1.66e-05	-3.10829	-3.63102	-3.12876	-4.48441	18	15	Q9D6F9	TBB4_MOUSE	ENSMUST00000071135		MGI:107848	NP_033477	PF00091;PF03953	Tubulin;Tubulin_C	Tubulin/FtsZ family, GTPase domain;Tubulin/FtsZ family, C-terminal domain	GO:0005874;GO:0005929;GO:0032991;GO:0033267;GO:0033269;GO:0042995;GO:0043025;GO:0043209;GO:0043234;GO:0044422;GO:0044424;GO:0044425;GO:0044430;GO:0044446;GO:0044459;GO:0044463;GO:0044464	microtubule;cilium;macromolecular complex;axon part;internode region of axon;cell projection;cell soma;myelin sheath;protein complex;organelle part;intracellular part;membrane part;cytoskeletal part;intracellular organelle part;plasma membrane part	GO:0000166;GO:0003824;GO:0003924;GO:0005198;GO:0005488;GO:0005525;GO:0016462;GO:0016787;GO:0016817;GO:0016818;GO:0017076;GO:0017111;GO:0019001;GO:0032553;GO:0032555;GO:0032561	nucleotide binding;catalytic activity;GTPase activity;structural molecule activity;binding;GTP binding;pyrophosphatase activity;hydrolase activity;hydrolase activity, acting on acid anhydrides	GO:0006461;GO:0007017;GO:0007018;GO:0009987;GO:0010926;GO:0016043;GO:0022607;GO:0030030;GO:0034621;GO:0034622;GO:0043623;GO:0043933;GO:0051258;GO:0065003	protein complex assembly;microtubule-based process;microtubule-based movement;cellular process;anatomical structure formation;cellular component organization;cellular component assembly;cell projection organization	mmu:22153	ko04540	Gap junction	K07375	49.585	444
IPI00465657	IPI00465657;IPI00895076	Mitogen-activated protein kinase kinase kinase 15;MAPK/ERK kinase kinase 15	Map3k15	Mitogen-activated protein kinase kinase kinase 15	8	8	5	-3.30464	2.48075e-05	-3.33412	-3.27516	-3.15254	-4.04162	63	27	A2AQW0	M3K15_MOUSE	ENSMUST00000033665	OTTMUSP00000020973	MGI:2448588	NP_001156557	PF00069	Pkinase	Protein kinase domain			GO:0000166;GO:0000287;GO:0001882;GO:0001883;GO:0003824;GO:0004672;GO:0004674;GO:0004702;GO:0004709;GO:0004871;GO:0005057;GO:0005488;GO:0005524;GO:0016301;GO:0016740;GO:0016772;GO:0016773;GO:0017076;GO:0030554;GO:0032553;GO:0032555;GO:0032559;GO:0043167;GO:0043169;GO:0046872;GO:0060089	nucleotide binding;magnesium ion binding;nucleoside binding;purine nucleoside binding;catalytic activity;protein kinase activity;protein serine/threonine kinase activity;receptor signaling protein serine/threonine kinase activity	GO:0006464;GO:0006468;GO:0006793;GO:0006796;GO:0008152;GO:0009987;GO:0016310;GO:0019538;GO:0034960;GO:0043170;GO:0043283;GO:0043412;GO:0043687;GO:0044237;GO:0044238;GO:0044260;GO:0044267	protein modification process;protein amino acid phosphorylation;phosphorus metabolic process;phosphate metabolic process;metabolic process;cellular process;phosphorylation;protein metabolic process;cellular biopolymer metabolic process					149.33	1331
IPI00880447	IPI00880447;IPI00153341;IPI00788322;IPI00856460	Nuclear receptor ROR-beta;Retinoid-related orphan receptor-beta;Nuclear receptor RZR-beta;Nuclear receptor subfamily 1 group F member 2	Rorb;Nr1f2	59 kDa protein;Isoform 2 of Nuclear receptor ROR-beta;Isoform 1 of Nuclear receptor ROR-beta;44 kDa protein	3	3	2	-3.23276	3.61312e-05	-3.17679	_	-3.23276	-3.44849	30	21	Q8R1B8-2;Q8R1B8;Q8R1B8-1	RORB_MOUSE	ENSMUST00000040153;ENSMUST00000112832;ENSMUST00000112834	OTTMUSP00000027181;OTTMUSP00000027765;OTTMUSP00000027391	MGI:1343464;MGI:1343464	NP_666207;NP_001036819	PF00104;PF00105	Hormone_recep;zf-C4	Ligand-binding domain of nuclear hormone receptor;Zinc finger, C4 type (two domains)	GO:0005634;GO:0043226;GO:0043227;GO:0043229;GO:0043231;GO:0044424;GO:0044464	nucleus;organelle;membrane-bounded organelle;intracellular organelle;intracellular membrane-bounded organelle;intracellular part;cell part	GO:0003676;GO:0003677;GO:0003700;GO:0003707;GO:0004871;GO:0004872;GO:0004879;GO:0005488;GO:0005515;GO:0008270;GO:0030528;GO:0043167;GO:0043169;GO:0043565;GO:0046872;GO:0046914;GO:0060089	nucleic acid binding;DNA binding;transcription factor activity;steroid hormone receptor activity;signal transducer activity;receptor activity;ligand-dependent nuclear receptor activity;binding;protein binding;zinc ion binding	GO:0003008;GO:0006139;GO:0006350;GO:0006355;GO:0006807;GO:0007600;GO:0007601;GO:0008152;GO:0009058;GO:0009059;GO:0009889;GO:0009891;GO:0009893;GO:0009987;GO:0010468;GO:0010556;GO:0010557;GO:0010604;GO:0010628;GO:0019219;GO:0019222;GO:0031323;GO:0031325;GO:0031326;GO:0031328;GO:0032501;GO:0032502;GO:0032583;GO:0034645;GO:0034960;GO:0034961;GO:0042461;GO:0042462;GO:0043170;GO:0043193;GO:0043283;GO:…	system process;nucleobase, nucleoside, nucleotide and nucleic acid metabolic process;transcription;regulation of transcription, DNA-dependent;nitrogen compound metabolic process;sensory perception;visual perception;metabolic process;biosynthetic process	mmu:225998			K08533	58.646	517
IPI00121159	IPI00121159;IPI00776077	Brix domain-containing protein 1	Bxdc1;MNCb-4285	Ribosome production factor 2 homolog;brix domain containing 1 isoform 2	9	9	5	-3.18928	4.51954e-05	-3.12383	-3.11134	-3.25473	-3.72074	42	42	Q9JJ80	BXDC1_MOUSE	ENSMUST00000045114		MGI:1914489	NP_075812;NP_001036021	PF04427	Brix	Brix domain	GO:0005730;GO:0043226;GO:0043228;GO:0043229;GO:0043232;GO:0044422;GO:0044424;GO:0044428;GO:0044446;GO:0044464	nucleolus;organelle;non-membrane-bounded organelle;intracellular organelle;intracellular non-membrane-bounded organelle;organelle part;intracellular part;nuclear part;intracellular organelle part;cell part					mmu:67239				35.363	306
IPI00380801	IPI00380801;IPI00222945;IPI00928459	SPARC-related modular calcium-binding protein 1;Secreted modular calcium-binding protein 1;SPARC-related gene protein	Smoc1;Srg	Isoform 1 of SPARC-related modular calcium-binding protein 1;Isoform 2 of SPARC-related modular calcium-binding protein 1;48 kDa protein	7	7	7	-3.12285	6.32858e-05	-2.84284	-3.64065	-2.56809	-3.40286	507	321	Q8BLY1-1;Q8BLY1;Q8BLY1-2	SMOC1_MOUSE	ENSMUST00000021564;ENSMUST00000110347	OTTMUSP00000046098;OTTMUSP00000046099;OTTMUSP00000046100	MGI:1929878;MGI:1929878	NP_001139689;NP_071711	PF07648;PF00086	Kazal_2;Thyroglobulin_1	Kazal-type serine protease inhibitor domain;Thyroglobulin type-1 repeat	GO:0005604;GO:0005615;GO:0044420;GO:0044421	basement membrane;extracellular space;extracellular matrix part;extracellular region part	GO:0005488;GO:0005509;GO:0043167;GO:0043169;GO:0046872;GO:0050840	binding;calcium ion binding;ion binding;cation binding;metal ion binding;extracellular matrix binding	GO:0009987;GO:0010810;GO:0010811;GO:0016043;GO:0030155;GO:0030198;GO:0043062;GO:0045785;GO:0048518;GO:0048522;GO:0050789;GO:0050794;GO:0065007	cellular process;regulation of cell-substrate adhesion;positive regulation of cell-substrate adhesion;cellular component organization;regulation of cell adhesion;extracellular matrix organization;extracellular structure organization	mmu:64075				51.076	463
IPI00119470	IPI00119470	Probable imidazolonepropionase;Amidohydrolase domain-containing protein 1	Amdhd1	Probable imidazolonepropionase	7	6	5	-3.10244	7.00934e-05	-2.79207	-3.41281	-2.06413	-3.8901	90	30	Q9DBA8	HUTI_MOUSE	ENSMUST00000016034	OTTMUSP00000040407	MGI:1919011	NP_082184	PF01979	Amidohydro_1	Amidohydrolase family	GO:0005737;GO:0044424;GO:0044464	cytoplasm;intracellular part;cell part	GO:0003824;GO:0005488;GO:0005506;GO:0008270;GO:0016787;GO:0016810;GO:0016812;GO:0043167;GO:0043169;GO:0046872;GO:0046914;GO:0050480	catalytic activity;binding;iron ion binding;zinc ion binding;hydrolase activity;hydrolase activity, acting on carbon-nitrogen (but not peptide) bonds;hydrolase activity, acting on carbon-nitrogen (but not peptide) bonds, in cyclic amides;ion binding	GO:0006082;GO:0006519;GO:0006520;GO:0006536;GO:0006547;GO:0006548;GO:0006807;GO:0008152;GO:0009056;GO:0009063;GO:0009064;GO:0009075;GO:0009077;GO:0009308;GO:0009310;GO:0009987;GO:0016054;GO:0019556;GO:0019752;GO:0034641;GO:0042180;GO:0043436;GO:0044106;GO:0044237;GO:0044238;GO:0044248;GO:0044270;GO:0046395	organic acid metabolic process;cellular amino acid and derivative metabolic process;cellular amino acid metabolic process;glutamate metabolic process;histidine metabolic process;histidine catabolic process;nitrogen compound metabolic process	mmu:71761	ko00340	Histidine metabolism	K01468	46.488	426
IPI00623845	IPI00623845;IPI00323816;IPI00880282	Selenium-binding protein 1;56 kDa selenium-binding protein;SP56;Selenium-binding protein 2;56 kDa acetaminophen-binding protein;AP56	Selenbp1;Lpsb;Selenbp2;Lpsb2	Selenium-binding protein 1;Selenium-binding protein 2	5	3	4	-3.08866	7.50715e-05	-3.12532	-2.78622	-3.10668	-3.07065	60	42	P17563;Q63836	SBP1_MOUSE;SBP2_MOUSE	ENSMUST00000090839;ENSMUST00000116310;ENSMUST00000090848	OTTMUSP00000021242;OTTMUSP00000021103	MGI:96825;MGI:104859	NP_033176;XP_001471746;NP_062287	PF05694	SBP56	56kDa selenium binding protein (SBP56)	GO:0005634;GO:0005829;GO:0016020;GO:0043226;GO:0043227;GO:0043229;GO:0043231;GO:0044424;GO:0044444;GO:0044464	nucleus;cytosol;membrane;organelle;membrane-bounded organelle;intracellular organelle;intracellular membrane-bounded organelle;intracellular part;cytoplasmic part;cell part	GO:0005488;GO:0008430	binding;selenium binding	GO:0006810;GO:0009987;GO:0015031;GO:0030154;GO:0032502;GO:0045184;GO:0045444;GO:0048869;GO:0050873;GO:0051234	transport;cellular process;protein transport;cell differentiation;developmental process;establishment of protein localization;fat cell differentiation;cellular developmental process;brown fat cell differentiation;establishment of localization	mmu:100044204;mmu:20341				52.513	472
IPI00263863	IPI00263863;IPI00120045;IPI00677499	10 kDa heat shock protein, mitochondrial;Hsp10;10 kDa chaperonin;CPN10;CPN10-like protein	Hspe1;Hspe1-rs1;Cpn10-rs1	10 kDa heat shock protein, mitochondrial;CPN10-like protein	19	17	18	-3.07743	7.93738e-05	-3.09889	-3.05597	-3.18843	-2.76161	78	45	Q64433;Q4KL76;Q9JI95	CH10_MOUSE;Q9JI95_MOUSE	ENSMUST00000075242;ENSMUST00000051437	OTTMUSP00000024434	MGI:104680;MGI:1935159	NP_032329;XP_898273;XP_916456	PF00166	Cpn10	Chaperonin 10 Kd subunit	GO:0005759;GO:0044422;GO:0044424;GO:0044429;GO:0044444;GO:0044446;GO:0044464	mitochondrial matrix;organelle part;intracellular part;mitochondrial part;cytoplasmic part;intracellular organelle part;cell part	GO:0000166;GO:0001882;GO:0001883;GO:0005488;GO:0005515;GO:0005524;GO:0017076;GO:0030554;GO:0032553;GO:0032555;GO:0032559;GO:0051087;GO:0005102;GO:0008083	nucleotide binding;nucleoside binding;purine nucleoside binding;binding;protein binding;ATP binding;purine nucleotide binding;adenyl nucleotide binding;ribonucleotide binding;purine ribonucleotide binding;adenyl ribonucleotide binding;chaperone binding	GO:0006457;GO:0006950;GO:0008152;GO:0009987;GO:0019538;GO:0034960;GO:0043170;GO:0043283;GO:0044237;GO:0044238;GO:0044260;GO:0044267;GO:0050896	protein folding;response to stress;metabolic process;cellular process;protein metabolic process;cellular biopolymer metabolic process;macromolecule metabolic process;biopolymer metabolic process;cellular metabolic process;primary metabolic process	mmu:15528;mmu:628438			K04078	10.963	102
IPI00319188	IPI00319188;IPI00755338	Lipoprotein lipase;Putative uncharacterized protein	Lpl	Lipoprotein lipase;lipoprotein lipase precursor	6	5	5	-3.07739	7.939e-05	-2.99479	-3.15999	-2.14621	-3.42029	57	51	P11152;Q3U5U0;Q3U6S8;Q3U715;Q3U784;Q3U841;Q3UB54;Q3UB98;Q3UBE9;Q3UC44;Q3UC81;Q3UCD4;Q3UCH4;Q3UCZ2;Q4FJQ8;Q8C562;Q3U831;Q3U9P4;Q3UAX2;Q542L4	LIPL_MOUSE;Q3U831_MOUSE	ENSMUST00000015712		MGI:96820;MGI:96820	XP_001476512;NP_032535	PF00151;PF01477	Lipase;PLAT	Lipase;PLAT/LH2 domain	GO:0005886;GO:0016020;GO:0031224;GO:0031225;GO:0032991;GO:0032994;GO:0034358;GO:0034361;GO:0034385;GO:0042627;GO:0044421;GO:0044425;GO:0044464	plasma membrane;membrane;intrinsic to membrane;anchored to membrane;macromolecular complex;protein-lipid complex;plasma lipoprotein particle;very-low-density lipoprotein particle;triglyceride-rich lipoprotein particle;chylomicron;extracellular region part	GO:0001871;GO:0003824;GO:0004091;GO:0004465;GO:0004806;GO:0005488;GO:0005539;GO:0008201;GO:0008289;GO:0016298;GO:0016787;GO:0016788;GO:0017129;GO:0030246;GO:0030247;GO:0005102;GO:0005515	pattern binding;catalytic activity;carboxylesterase activity;lipoprotein lipase activity;triacylglycerol lipase activity;binding;glycosaminoglycan binding;heparin binding;lipid binding;lipase activity;hydrolase activity	GO:0002682;GO:0002761;GO:0002763;GO:0006629;GO:0006638;GO:0006639;GO:0006641;GO:0006662;GO:0008152;GO:0009056;GO:0009987;GO:0010743;GO:0010744;GO:0016042;GO:0018904;GO:0019433;GO:0044237;GO:0044238;GO:0044242;GO:0044248;GO:0044255;GO:0044269;GO:0045595;GO:0045597;GO:0045637;GO:0045639;GO:0045649;GO:0045651;GO:0046461;GO:0046464;GO:0046486;GO:0046503;GO:0048518;GO:0048522;GO:0050789;GO:0050793;GO:…	regulation of immune system process;regulation of myeloid leukocyte differentiation;positive regulation of myeloid leukocyte differentiation;lipid metabolic process;neutral lipid metabolic process;acylglycerol metabolic process	mmu:669888;mmu:16956	ko00561;ko03320;ko05010	Glycerolipid metabolism;PPAR signaling pathway;Alzheimer's disease	K01059	53.126	474
IPI00230416	IPI00230416;IPI00407546	Eukaryotic translation initiation factor 2 subunit 3, Y-linked;Eukaryotic translation initiation factor 2 subunit gamma, Y-linked;Putative uncharacterized protein;Eukaryotic translation initiation factor 2, subunit 3, structural gene Y-linked, isoform CRA_b	Eif2s3y;mCG_121151	Eukaryotic translation initiation factor 2 subunit 3, Y-linked;Eukaryotic translation initiation factor 2, subunit 3, structural gene Y-linked, isoform CRA_b	5	2	5	-3.06243	8.54865e-05	-3.55508	-2.56977	-3.73213	-1.13591	198	132	Q9Z0N2;Q9D791;Q9CZT2	IF2H_MOUSE;Q9CZT2_MOUSE	ENSMUST00000091197;ENSMUST00000091194	OTTMUSP00000024027	MGI:1349430;MGI:1349430	NP_036141	PF09173;PF00009;PF03144	eIF2_C;GTP_EFTU;GTP_EFTU_D2	Initiation factor eIF2 gamma, C terminal;Elongation factor Tu GTP binding domain;Elongation factor Tu domain 2			GO:0000166;GO:0003676;GO:0003743;GO:0003824;GO:0003924;GO:0005488;GO:0005525;GO:0008135;GO:0016462;GO:0016787;GO:0016817;GO:0016818;GO:0017076;GO:0017111;GO:0019001;GO:0032553;GO:0032555;GO:0032561;GO:0045182	nucleotide binding;nucleic acid binding;translation initiation factor activity;catalytic activity;GTPase activity;binding;GTP binding;translation factor activity, nucleic acid binding;pyrophosphatase activity;hydrolase activity	GO:0006412;GO:0008152;GO:0009058;GO:0009059;GO:0009987;GO:0019538;GO:0034645;GO:0034960;GO:0034961;GO:0043170;GO:0043283;GO:0043284;GO:0044237;GO:0044238;GO:0044249;GO:0044260;GO:0044267	translation;metabolic process;biosynthetic process;macromolecule biosynthetic process;cellular process;protein metabolic process;cellular macromolecule biosynthetic process;cellular biopolymer metabolic process;cellular biopolymer biosynthetic process	mmu:26908			K03242	51.13	472
IPI00311453	IPI00311453	Putative ribosomal RNA methyltransferase NOP2;Nucleolar protein 2 homolog;Nucleolar protein 1;Proliferating-cell nucleolar antigen p120;Proliferation-associated nucleolar protein p120	Nop2;Nol1	nucleolar protein 1	16	14	13	-3.0348	9.79122e-05	-2.92488	-3.17525	-2.35072	-3.14472	261	222	Q922K7;Q99KC3	NOP2_MOUSE	ENSMUST00000044200		MGI:107891	NP_620086	PF01189;PF08062	Nol1_Nop2_Fmu;P120R	NOL1/NOP2/sun family;P120R (NUC006) repeat	GO:0005730;GO:0043226;GO:0043228;GO:0043229;GO:0043232;GO:0044422;GO:0044424;GO:0044428;GO:0044446;GO:0044464	nucleolus;organelle;non-membrane-bounded organelle;intracellular organelle;intracellular non-membrane-bounded organelle;organelle part;intracellular part;nuclear part;intracellular organelle part;cell part	GO:0003676;GO:0003723;GO:0003824;GO:0005488;GO:0008168;GO:0008757;GO:0016740;GO:0016741	nucleic acid binding;RNA binding;catalytic activity;binding;methyltransferase activity;S-adenosylmethionine-dependent methyltransferase activity;transferase activity;transferase activity, transferring one-carbon groups	GO:0006139;GO:0006364;GO:0006396;GO:0006807;GO:0008152;GO:0009987;GO:0016070;GO:0016072;GO:0034470;GO:0034660;GO:0034960;GO:0043170;GO:0043283;GO:0044237;GO:0044238;GO:0044260	nucleobase, nucleoside, nucleotide and nucleic acid metabolic process;rRNA processing;RNA processing;nitrogen compound metabolic process;metabolic process;cellular process;RNA metabolic process;rRNA metabolic process;ncRNA processing					86.906	794
IPI00757372	IPI00757372	Isochorismatase domain-containing protein 2A, mitochondrial	Isoc2a;Isoc2	Isochorismatase domain-containing protein 2A, mitochondrial	2	2	1	-3.03163	9.94411e-05	-2.99545	-3.4676	-3.06782	-1.71557	6	3	P85094;B2RY90	ISC2A_MOUSE			MGI:3609243	NP_001095068	PF00857	Isochorismatase	Isochorismatase family	GO:0005739;GO:0043226;GO:0043227;GO:0043229;GO:0043231;GO:0044424;GO:0044444;GO:0044464	mitochondrion;organelle;membrane-bounded organelle;intracellular organelle;intracellular membrane-bounded organelle;intracellular part;cytoplasmic part;cell part	GO:0003824	catalytic activity	GO:0008152	metabolic process	mmu:664994				22.417	206
IPI00308885	IPI00308885;IPI00461249;IPI00845678;IPI00830313;IPI00830195;IPI00749932;IPI00853695	60 kDa heat shock protein, mitochondrial;Heat shock protein 60;60 kDa chaperonin;Chaperonin 60;Mitochondrial matrix protein P1;HSP-65	Hspd1;Hsp60	Isoform 1 of 60 kDa heat shock protein, mitochondrial;similar to Heat shock protein 1	54	53	44	-2.97726	0.000129436	-3.06377	-3.21581	-2.89076	-2.30666	45	60	P63038-1;P63038	CH60_MOUSE	ENSMUST00000027123	OTTMUSP00000024365	MGI:96242	NP_034607;XP_484008	PF00118	Cpn60_TCP1	TCP-1/cpn60 chaperonin family	GO:0005743;GO:0005759;GO:0016020;GO:0016023;GO:0019866;GO:0030141;GO:0031090;GO:0031410;GO:0031966;GO:0031982;GO:0031988;GO:0043226;GO:0043227;GO:0043229;GO:0043231;GO:0044422;GO:0044424;GO:0044425;GO:0044429;GO:0044444;GO:0044446;GO:0044459;GO:0044464	mitochondrial inner membrane;mitochondrial matrix;membrane;cytoplasmic membrane-bounded vesicle;organelle inner membrane;secretory granule;organelle membrane;cytoplasmic vesicle;mitochondrial membrane;vesicle;membrane-bounded vesicle;organelle	GO:0000166;GO:0001530;GO:0001882;GO:0001883;GO:0005488;GO:0005515;GO:0005524;GO:0017076;GO:0030554;GO:0032553;GO:0032555;GO:0032559	nucleotide binding;lipopolysaccharide binding;nucleoside binding;purine nucleoside binding;binding;protein binding;ATP binding;purine nucleotide binding;adenyl nucleotide binding;ribonucleotide binding;purine ribonucleotide binding	GO:0001775;GO:0001817;GO:0001819;GO:0002376;GO:0002682;GO:0002684;GO:0002694;GO:0002696;GO:0006457;GO:0008152;GO:0009987;GO:0019538;GO:0032479;GO:0032481;GO:0032647;GO:0032649;GO:0032727;GO:0032729;GO:0034960;GO:0042110;GO:0043170;GO:0043283;GO:0044237;GO:0044238;GO:0044260;GO:0044267;GO:0045321;GO:0046649;GO:0048518;GO:0048522;GO:0050789;GO:0050794;GO:0050863;GO:0050865;GO:0050867;GO:0050870;GO:…	cell activation;regulation of cytokine production;positive regulation of cytokine production;immune system process;regulation of immune system process;positive regulation of immune system process;regulation of leukocyte activation	mmu:15510	ko04940	Type I diabetes mellitus	K04077	60.955	573
IPI00357734	IPI00357734;IPI00649240	DBF4-type zinc finger-containing protein 2 homolog	Zdbf2	DBF4-type zinc finger-containing protein 2 homolog	20	19	12	-2.96508	0.00013723	-2.88528	-3.30887	-2.72075	-3.04489	30	15	Q5SS00	ZDBF2_MOUSE	ENSMUST00000029025;ENSMUST00000114132	OTTMUSP00000002454	MGI:1921134	NP_082949														273.74	2493
IPI00672508	IPI00672508;IPI00284094;IPI00125939;IPI00230588	Cytosolic acyl coenzyme A thioester hydrolase;Long chain acyl-CoA thioester hydrolase;Acyl-CoA thioesterase 7;CTE-IIa;Brain acyl-CoA hydrolase	Acot7;Bach	Isoform D of Cytosolic acyl coenzyme A thioester hydrolase;Isoform A of Cytosolic acyl coenzyme A thioester hydrolase;acyl-CoA thioesterase 7 isoform 1;Isoform C of Cytosolic acyl coenzyme A thioester hydrolase	9	8	7	-2.94587	0.000150429	-2.93158	-2.96015	-2.93007	-3.55203	66	36	Q91V12-4;Q91V12;Q91V12-2;Q91V12-1;Q91V12-3	BACH_MOUSE	ENSMUST00000030779;ENSMUST00000075363;ENSMUST00000105652	OTTMUSP00000011002;OTTMUSP00000011019;OTTMUSP00000011020	MGI:1917275;MGI:1917275;MGI:1917275;MGI:1917275	NP_579926;NP_001139529;NP_001139530	PF03061	4HBT	Thioesterase superfamily	GO:0005829;GO:0044424;GO:0044444;GO:0044464	cytosol;intracellular part;cytoplasmic part;cell part	GO:0003824;GO:0004091;GO:0016289;GO:0016290;GO:0016291;GO:0016787;GO:0016788;GO:0016790	catalytic activity;carboxylesterase activity;CoA hydrolase activity;palmitoyl-CoA hydrolase activity;acyl-CoA thioesterase activity;hydrolase activity;hydrolase activity, acting on ester bonds;thiolester hydrolase activity	GO:0006082;GO:0006629;GO:0006631;GO:0008152;GO:0009056;GO:0009062;GO:0009987;GO:0016042;GO:0016054;GO:0019752;GO:0032787;GO:0042180;GO:0043436;GO:0044237;GO:0044238;GO:0044242;GO:0044248;GO:0044255;GO:0046395	organic acid metabolic process;lipid metabolic process;fatty acid metabolic process;metabolic process;catabolic process;fatty acid catabolic process;cellular process;lipid catabolic process;organic acid catabolic process;carboxylic acid metabolic process	mmu:70025	ko01040	Biosynthesis of unsaturated fatty acids	K01068	41.615	379
IPI00929800	IPI00929800;IPI00756893;IPI00122429	Retinol-binding protein 4;Plasma retinol-binding protein	Rbp4	retinol-binding protein 4, plasma isoform 1;similar to retinol binding protein;Retinol-binding protein 4	3	3	1	-2.94481	0.000151189	-3.26968	-4.09724	-2.61993	-1.58678	108	90	Q00724;Q3TF08	RET4_MOUSE	ENSMUST00000025951;ENSMUST00000112335		MGI:97879	NP_001152959;XP_001478475;NP_035385	PF00061	Lipocalin	Lipocalin / cytosolic fatty-acid binding protein family	GO:0005615;GO:0044421	extracellular space;extracellular region part	GO:0005215;GO:0005488;GO:0005501;GO:0008289;GO:0016918;GO:0019840;GO:0019841;GO:0019842;GO:0034632;GO:0051183	transporter activity;binding;retinoid binding;lipid binding;retinal binding;isoprenoid binding;retinol binding;vitamin binding;retinol transporter activity;vitamin transporter activity	GO:0001501;GO:0001523;GO:0002637;GO:0002682;GO:0002697;GO:0002700;GO:0003006;GO:0005975;GO:0005996;GO:0006006;GO:0006066;GO:0006081;GO:0006082;GO:0006090;GO:0006094;GO:0006629;GO:0006720;GO:0006721;GO:0006766;GO:0006775;GO:0006776;GO:0006810;GO:0006869;GO:0007284;GO:0008152;GO:0008285;GO:0008406;GO:0008584;GO:0009058;GO:0009314;GO:0009416;GO:0009581;GO:0009582;GO:0009583;GO:0009584;GO:0009605;GO:…	skeletal system development;retinoid metabolic process;regulation of immunoglobulin production;regulation of immune system process;regulation of immune effector process;regulation of production of molecular mediator of immune response	mmu:19662				28.405	245
IPI00133776	IPI00133776	Methylmalonyl-CoA epimerase, mitochondrial;DL-methylmalonyl-CoA racemase	Mcee	Methylmalonyl-CoA epimerase, mitochondrial	2	1	2	-2.93133	0.000161192	-3.09235	-2.7703	-3.68269	-1.94466	72	57	Q9D1I5	MCEE_MOUSE	ENSMUST00000037205	OTTMUSP00000033953	MGI:1920974	NP_082902	PF00903	Glyoxalase	Glyoxalase/Bleomycin resistance protein/Dioxygenase superfamily	GO:0005739;GO:0043226;GO:0043227;GO:0043229;GO:0043231;GO:0044424;GO:0044444;GO:0044464	mitochondrion;organelle;membrane-bounded organelle;intracellular organelle;intracellular membrane-bounded organelle;intracellular part;cytoplasmic part;cell part	GO:0003824;GO:0004493;GO:0016853;GO:0016854	catalytic activity;methylmalonyl-CoA epimerase activity;isomerase activity;racemase and epimerase activity			mmu:73724	ko00640;ko00280	Propanoate metabolism;Valine, leucine and isoleucine degradation	K05606	19.017	178
IPI00877205	IPI00877205;IPI00856409	Aspartate aminotransferase	Got1	aspartate aminotransferase 1	2	1	2	-2.88777	0.000197919	-1.16745	-4.65943	-0.576844	-4.60808	117	51	Q3UJH8	Q3UJH8_MOUSE	ENSMUST00000026196	OTTMUSP00000027809	MGI:95791	NP_034454	PF00155	Aminotran_1_2	Aminotransferase class I and II	GO:0005829;GO:0044424;GO:0044444;GO:0044464	cytosol;intracellular part;cytoplasmic part;cell part	GO:0003824;GO:0004069;GO:0004609;GO:0005488;GO:0005496;GO:0008289;GO:0008483;GO:0016740;GO:0016769;GO:0016829;GO:0016830;GO:0016831;GO:0019842;GO:0030170;GO:0048037;GO:0070279	catalytic activity;L-aspartate:2-oxoglutarate aminotransferase activity;phosphatidylserine decarboxylase activity;binding;steroid binding;lipid binding;transaminase activity;transferase activity;transferase activity, transferring nitrogenous groups	GO:0005975;GO:0006066;GO:0006071;GO:0006082;GO:0006103;GO:0006106;GO:0006107;GO:0006114;GO:0006519;GO:0006520;GO:0006531;GO:0006532;GO:0006533;GO:0006536;GO:0006538;GO:0006807;GO:0008152;GO:0008652;GO:0009056;GO:0009058;GO:0009063;GO:0009064;GO:0009065;GO:0009066;GO:0009067;GO:0009068;GO:0009308;GO:0009309;GO:0009310;GO:0009719;GO:0009725;GO:0009987;GO:0010033;GO:0016051;GO:0016053;GO:0016054;GO:…	carbohydrate metabolic process;alcohol metabolic process;glycerol metabolic process;organic acid metabolic process;2-oxoglutarate metabolic process;fumarate metabolic process;oxaloacetate metabolic process;glycerol biosynthetic process	mmu:14718	ko00710;ko00251;ko00252;ko00272;ko00330;ko00350;ko00360;ko00400;ko00950;ko00401	Carbon fixation in photosynthetic organisms;Glutamate metabolism;Alanine and aspartate metabolism;Cysteine metabolism;Arginine and proline metabolism;Tyrosine metabolism;Phenylalanine metabolism;Phenylalanine, tyrosine and tryptophan biosynthesis;Alkaloid biosynthesis I;Novobiocin biosynthesis	K00813	46.247	413
IPI00400180	IPI00400180;IPI00752684	Amphiphysin	Amph;Amph1	Amphiphysin	6	6	4	-2.83396	0.000254079	-2.50837	-4.04997	-2.52633	-3.14158	198	176	Q7TQF7;Q80YA2;Q8BXH2	AMPH_MOUSE	ENSMUST00000003345		MGI:103574	NP_778172	PF03114;PF00018	BAR;SH3_1	BAR domain;SH3 domain	GO:0005856;GO:0012506;GO:0016020;GO:0016023;GO:0030054;GO:0030141;GO:0030659;GO:0030662;GO:0030665;GO:0030672;GO:0031090;GO:0031410;GO:0031982;GO:0031988;GO:0043226;GO:0043227;GO:0043228;GO:0043229;GO:0043231;GO:0043232;GO:0044422;GO:0044424;GO:0044425;GO:0044433;GO:0044444;GO:0044446;GO:0044459;GO:0044464	cytoskeleton;vesicle membrane;membrane;cytoplasmic membrane-bounded vesicle;cell junction;secretory granule;cytoplasmic vesicle membrane;coated vesicle membrane;clathrin coated vesicle membrane;synaptic vesicle membrane;organelle membrane	GO:0005488;GO:0005515	binding;protein binding	GO:0003008;GO:0006810;GO:0006897;GO:0007610;GO:0007611;GO:0007612;GO:0009987;GO:0010324;GO:0016043;GO:0016044;GO:0016192;GO:0032501;GO:0048488;GO:0048489;GO:0050877;GO:0050890;GO:0050896;GO:0051234	system process;transport;endocytosis;behavior;learning or memory;learning;cellular process;membrane invagination;cellular component organization;membrane organization;vesicle-mediated transport;multicellular organismal process;synaptic vesicle endocytosis	mmu:218038				75.012	686
IPI00626662	IPI00626662;IPI00336362	Retinal dehydrogenase 1;Aldehyde dehydrogenase family 1 member A1;Aldehyde dehydrogenase, cytosolic;ALHDII;ALDH-E1;Aldehyde dehydrogenase, cytosolic 1;ALDH class 1;Aldehyde dehydrogenase family 1 member A7;Aldehyde dehydrogenase phenobarbital-inducible	Aldh1a1;Ahd-2;Ahd2;Aldh1;Aldh1a7;Aldh-pb	Retinal dehydrogenase 1;Aldehyde dehydrogenase, cytosolic 1	13	12	9	-2.80342	0.000292236	-2.6548	-2.97917	-1.1247	-2.95204	84	51	P24549;O35945;B2RTL5	AL1A1_MOUSE;AL1A7_MOUSE	ENSMUST00000087638;ENSMUST00000025656	OTTMUSP00000023466;OTTMUSP00000035734	MGI:1353450;MGI:1347050	NP_038495;NP_036051	PF00171	Aldedh	Aldehyde dehydrogenase family	GO:0005737;GO:0044424;GO:0044464	cytoplasm;intracellular part;cell part	GO:0001758;GO:0003824;GO:0004028;GO:0016491;GO:0016620;GO:0016903;GO:0004029	retinal dehydrogenase activity;catalytic activity;3-chloroallyl aldehyde dehydrogenase activity;oxidoreductase activity;oxidoreductase activity, acting on the aldehyde or oxo group of donors, NAD or NADP as acceptor	GO:0001523;GO:0002009;GO:0002072;GO:0006082;GO:0006629;GO:0006720;GO:0006721;GO:0006766;GO:0006775;GO:0006776;GO:0008152;GO:0008299;GO:0008610;GO:0009058;GO:0009110;GO:0009653;GO:0009887;GO:0009987;GO:0010817;GO:0010941;GO:0010942;GO:0016101;GO:0016331;GO:0019748;GO:0019752;GO:0032502;GO:0032787;GO:0034754;GO:0035238;GO:0042180;GO:0042221;GO:0042362;GO:0042445;GO:0042493;GO:0042572;GO:0042573;GO:…	retinoid metabolic process;morphogenesis of an epithelium;optic cup morphogenesis involved in camera-type eye development;organic acid metabolic process;lipid metabolic process;isoprenoid metabolic process;terpenoid metabolic process	mmu:11668;mmu:26358	ko00830	Retinol metabolism	K07249	54.467	501
IPI00458958	IPI00458958	RRP15-like protein;Ribosomal RNA-processing protein 15	Rrp15	RRP15-like protein	3	3	3	-2.79484	0.000303881	-2.76299	-2.67632	-2.82668	-3.35249	261	186	Q9CYX7	RRP15_MOUSE	ENSMUST00000001339		MGI:1914473	NP_080317	PF07890	Rrp15p	Rrp15p							mmu:67223				31.058	281
IPI00132415	IPI00132415	Probable dimethyladenosine transferase;S-adenosylmethionine-6-N',N'-adenosyl(rRNA) dimethyltransferase;18S rRNA dimethylase;DIM1 dimethyladenosine transferase 1-like	Dimt1l;Dimt1	Probable dimethyladenosine transferase	4	3	3	-2.79396	0.000305096	-2.67896	-2.90896	-2.52991	-2.99514	99	42	Q9D0D4;Q3UK38	DIMT1_MOUSE	ENSMUST00000022203		MGI:1913504	NP_079723	PF00398	RrnaAD	Ribosomal RNA adenine dimethylase	GO:0005730;GO:0043226;GO:0043228;GO:0043229;GO:0043232;GO:0044422;GO:0044424;GO:0044428;GO:0044446;GO:0044464	nucleolus;organelle;non-membrane-bounded organelle;intracellular organelle;intracellular non-membrane-bounded organelle;organelle part;intracellular part;nuclear part;intracellular organelle part;cell part	GO:0000179;GO:0003676;GO:0003723;GO:0003824;GO:0005488;GO:0008168;GO:0008170;GO:0008173;GO:0008649;GO:0008757;GO:0016433;GO:0016740;GO:0016741	rRNA (adenine-N6,N6-)-dimethyltransferase activity;nucleic acid binding;RNA binding;catalytic activity;binding;methyltransferase activity;N-methyltransferase activity;RNA methyltransferase activity;rRNA methyltransferase activity	GO:0000154;GO:0006139;GO:0006364;GO:0006396;GO:0006807;GO:0008152;GO:0009451;GO:0009987;GO:0016070;GO:0016072;GO:0034470;GO:0034660;GO:0034960;GO:0043170;GO:0043283;GO:0043412;GO:0044237;GO:0044238;GO:0044260	rRNA modification;nucleobase, nucleoside, nucleotide and nucleic acid metabolic process;rRNA processing;RNA processing;nitrogen compound metabolic process;metabolic process;RNA modification;cellular process;RNA metabolic process;rRNA metabolic process	mmu:66254			K02528	35.274	313
IPI00226149	IPI00226149	Putative uncharacterized protein	Rsl1d1	Putative uncharacterized protein	16	15	11	-2.79004	0.000310579	-2.76674	-2.51908	-3.48274	-2.81333	105	111	Q3TAJ5;Q3TGI9;Q3TH37;Q3TLJ3;Q3TN25;Q3TS64;Q3UL54;Q8BVY0;Q8K235;Q9CSF9	Q3TAJ5_MOUSE	ENSMUST00000067507;ENSMUST00000119953	OTTMUSP00000032618	MGI:1913659	NP_079822	PF00687	Ribosomal_L1	Ribosomal protein L1p/L10e family	GO:0005730;GO:0043226;GO:0043228;GO:0043229;GO:0043232;GO:0044422;GO:0044424;GO:0044428;GO:0044446;GO:0044464	nucleolus;organelle;non-membrane-bounded organelle;intracellular organelle;intracellular non-membrane-bounded organelle;organelle part;intracellular part;nuclear part;intracellular organelle part;cell part	GO:0003676;GO:0003723;GO:0005488;GO:0005515	nucleic acid binding;RNA binding;binding;protein binding	GO:0006139;GO:0006396;GO:0006807;GO:0008152;GO:0009987;GO:0016070;GO:0034960;GO:0043170;GO:0043283;GO:0044237;GO:0044238;GO:0044260	nucleobase, nucleoside, nucleotide and nucleic acid metabolic process;RNA processing;nitrogen compound metabolic process;metabolic process;cellular process;RNA metabolic process;cellular biopolymer metabolic process;macromolecule metabolic process	mmu:66409				51.921	465
IPI00132344	IPI00132344	Uncharacterized protein C16orf14 homolog		Protein FAM195A	3	3	3	-2.7623	0.000352066	-2.85068	-3.49339	-2.67392	-1.82042	72	45	Q9CQB2	CP014_MOUSE	ENSMUST00000026828		MGI:1915491	NP_080909						GO:0005488;GO:0005515	binding;protein binding			mmu:68241				17.871	160
IPI00515330	IPI00515330;IPI00457611;IPI00648786;IPI00467599;IPI00648670;IPI00881839	Septin-9;SL3-3 integration site 1 protein;Septin 9	Sept9;Kiaa0991;Sint1;RP23-101J23.1-006	Isoform 3 of Septin-9;Isoform 1 of Septin-9;Septin 9;Isoform 2 of Septin-9	33	30	26	-2.74283	0.000384196	-2.6817	-2.86997	-2.7568	-2.72887	12	9	Q80UG5-3;Q80UG5;Q80UG5-1;A2A6U3;Q3TDR9;Q80UG5-2	SEPT9_MOUSE;A2A6U3_MOUSE	ENSMUST00000019038;ENSMUST00000093907;ENSMUST00000106351;ENSMUST00000106354	OTTMUSP00000004044;OTTMUSP00000004043;OTTMUSP00000004047;OTTMUSP00000004045;OTTMUSP00000004046	MGI:1858222;MGI:1858222;MGI:1858222;MGI:1858222	NP_001106959;NP_001106958;NP_001106960;NP_059076	PF00735	Septin	Septin	GO:0005886;GO:0016020;GO:0044464;GO:0031105;GO:0032991;GO:0043234;GO:0044422;GO:0044424;GO:0044430;GO:0044444;GO:0044446;GO:0044448	plasma membrane;membrane;cell part;septin complex;macromolecular complex;protein complex;organelle part;intracellular part;cytoskeletal part;cytoplasmic part;intracellular organelle part;cell cortex part	GO:0000166;GO:0005488;GO:0005525;GO:0017076;GO:0019001;GO:0032553;GO:0032555;GO:0032561	nucleotide binding;binding;GTP binding;purine nucleotide binding;guanyl nucleotide binding;ribonucleotide binding;purine ribonucleotide binding;guanyl ribonucleotide binding	GO:0007049;GO:0009987;GO:0051301	cell cycle;cellular process;cell division	mmu:53860				64.774	576
IPI00318725	IPI00318725	Ribosome biogenesis regulatory protein homolog	Rrs1;Rrr;MNCb-2643	Ribosome biogenesis regulatory protein homolog	10	7	8	-2.67513	0.000518369	-2.78876	-2.5615	-2.15699	-3.10049	57	51	Q9CYH6;Q80U76	RRS1_MOUSE	ENSMUST00000072079		MGI:1929721	NP_067486	PF04939	RRS1	Ribosome biogenesis regulatory protein (RRS1)	GO:0005730;GO:0043226;GO:0043228;GO:0043229;GO:0043232;GO:0044422;GO:0044424;GO:0044428;GO:0044446;GO:0044464	nucleolus;organelle;non-membrane-bounded organelle;intracellular organelle;intracellular non-membrane-bounded organelle;organelle part;intracellular part;nuclear part;intracellular organelle part;cell part			GO:0009987;GO:0022613;GO:0042254;GO:0044085	cellular process;ribonucleoprotein complex biogenesis;ribosome biogenesis;cellular component biogenesis	mmu:59014				41.551	365
IPI00461861	IPI00461861	Neprilysin;Neutral endopeptidase 24.11;Enkephalinase;Atriopeptidase	Mme	Neprilysin	2	1	2	-2.57499	0.000797699	-3.11065	-2.35279	-2.33173	-2.79719	270	213	Q61391;Q8BNU9	NEP_MOUSE	ENSMUST00000029400;ENSMUST00000107889		MGI:97004	NP_032630	PF01431;PF05649	Peptidase_M13;Peptidase_M13_N	Peptidase family M13;Peptidase family M13	GO:0005886;GO:0016020;GO:0016021;GO:0031224;GO:0044425;GO:0044464	plasma membrane;membrane;integral to membrane;intrinsic to membrane;membrane part;cell part	GO:0003824;GO:0004175;GO:0004222;GO:0005488;GO:0008233;GO:0008237;GO:0008270;GO:0016787;GO:0043167;GO:0043169;GO:0046872;GO:0046914;GO:0070011	catalytic activity;endopeptidase activity;metalloendopeptidase activity;binding;peptidase activity;metallopeptidase activity;zinc ion binding;hydrolase activity;ion binding;cation binding;metal ion binding;transition metal ion binding	GO:0006508;GO:0008152;GO:0009056;GO:0009057;GO:0019538;GO:0030163;GO:0043170;GO:0043283;GO:0043285;GO:0044238	proteolysis;metabolic process;catabolic process;macromolecule catabolic process;protein metabolic process;protein catabolic process;macromolecule metabolic process;biopolymer metabolic process;biopolymer catabolic process;primary metabolic process	mmu:17380	ko04614;ko04640;ko05010	Renin-angiotensin system;Hematopoietic cell lineage;Alzheimer's disease	K01389	85.701	750
IPI00225912	IPI00225912;IPI00608122	MKI67 FHA domain-interacting nucleolar phosphoprotein;Nucleolar protein interacting with the FHA domain of pKI-67	Mki67ip;Nifk	Isoform 1 of MKI67 FHA domain-interacting nucleolar phosphoprotein;Isoform 2 of MKI67 FHA domain-interacting nucleolar phosphoprotein	7	7	6	-2.57345	0.000802902	-2.44468	-2.45925	-2.68765	-3.24164	6	6	Q91VE6-1;Q91VE6;Q8BMY3;Q91VE6-2	MK67I_MOUSE	ENSMUST00000027626;ENSMUST00000112688		MGI:1915199;MGI:1915199	NP_080748	PF00076	RRM_1	RNA recognition motif. (a.k.a. RRM, RBD, or RNP domain)	GO:0005730;GO:0043226;GO:0043228;GO:0043229;GO:0043232;GO:0044422;GO:0044424;GO:0044428;GO:0044446;GO:0044464	nucleolus;organelle;non-membrane-bounded organelle;intracellular organelle;intracellular non-membrane-bounded organelle;organelle part;intracellular part;nuclear part;intracellular organelle part;cell part	GO:0000166;GO:0003676;GO:0003723;GO:0005488	nucleotide binding;nucleic acid binding;RNA binding;binding			mmu:67949				36.265	317
IPI00122344	IPI00122344	Cystathionine gamma-lyase;Gamma-cystathionase	Cth	Cystathionine gamma-lyase	2	2	2	-2.54844	0.000892122	-2.98072	-2.63324	-2.46365	-1.33959	6	6	Q8VCN5	CGL_MOUSE	ENSMUST00000118539	OTTMUSP00000038207	MGI:1339968	NP_666065	PF01053	Cys_Met_Meta_PP	Cys/Met metabolism PLP-dependent enzyme	GO:0005737;GO:0044424;GO:0044464	cytoplasm;intracellular part;cell part	GO:0003824;GO:0004123;GO:0005488;GO:0005496;GO:0008289;GO:0016829;GO:0016846;GO:0019842;GO:0030170;GO:0048037;GO:0070279	catalytic activity;cystathionine gamma-lyase activity;binding;steroid binding;lipid binding;lyase activity;carbon-sulfur lyase activity;vitamin binding;pyridoxal phosphate binding;cofactor binding;vitamin B6 binding	GO:0000096;GO:0000097;GO:0006082;GO:0006519;GO:0006520;GO:0006534;GO:0006790;GO:0006807;GO:0008152;GO:0008652;GO:0009058;GO:0009069;GO:0009070;GO:0009308;GO:0009309;GO:0009987;GO:0016053;GO:0019344;GO:0019752;GO:0034641;GO:0042180;GO:0043436;GO:0044106;GO:0044237;GO:0044238;GO:0044249;GO:0044271;GO:0044272;GO:0046394	sulfur amino acid metabolic process;sulfur amino acid biosynthetic process;organic acid metabolic process;cellular amino acid and derivative metabolic process;cellular amino acid metabolic process;cysteine metabolic process;sulfur metabolic process	mmu:107869	ko00910;ko00260;ko00271;ko00272;ko00450	Nitrogen metabolism;Glycine, serine and threonine metabolism;Methionine metabolism;Cysteine metabolism;Selenoamino acid metabolism	K01758	43.567	398
IPI00229457	IPI00229457	Large neutral amino acids transporter small subunit 4;L-type amino L-acid transporter 4;Solute carrier family 43 member 2	Slc43a2;Lat4	Large neutral amino acids transporter small subunit 4	4	4	4	-2.54775	0.000894739	-3.05508	-2.49804	-2.43908	-2.59745	24	6	Q8CGA3	LAT4_MOUSE	ENSMUST00000042561;ENSMUST00000100839;ENSMUST00000108433	OTTMUSP00000006513;OTTMUSP00000006514	MGI:2442746	NP_775564	PF07690	MFS_1	Major Facilitator Superfamily	GO:0005886;GO:0016020;GO:0016021;GO:0031224;GO:0044425;GO:0044464	plasma membrane;membrane;integral to membrane;intrinsic to membrane;membrane part;cell part	GO:0005215;GO:0005275;GO:0005342;GO:0015171;GO:0015179;GO:0022804;GO:0022857;GO:0022891;GO:0022892;GO:0046943	transporter activity;amine transmembrane transporter activity;organic acid transmembrane transporter activity;amino acid transmembrane transporter activity;L-amino acid transmembrane transporter activity;active transmembrane transporter activity	GO:0006810;GO:0006865;GO:0009987;GO:0015807;GO:0015837;GO:0015849;GO:0046942;GO:0051234;GO:0055085	transport;amino acid transport;cellular process;L-amino acid transport;amine transport;organic acid transport;carboxylic acid transport;establishment of localization;transmembrane transport	mmu:215113			K08229	62.43	568
IPI00118963	IPI00118963	39S ribosomal protein L12, mitochondrial	Mrpl12;Rpml12	39S ribosomal protein L12, mitochondrial	8	8	5	-2.53063	0.000961119	-2.47458	-2.77986	-2.58668	-1.91252	27	27	Q9DB15	RM12_MOUSE	ENSMUST00000043627	OTTMUSP00000004660	MGI:1926273	NP_081480	PF00542	Ribosomal_L12	Ribosomal protein L7/L12 C-terminal domain	GO:0005739;GO:0005840;GO:0030529;GO:0032991;GO:0043226;GO:0043227;GO:0043228;GO:0043229;GO:0043231;GO:0043232;GO:0044424;GO:0044444;GO:0044464	mitochondrion;ribosome;ribonucleoprotein complex;macromolecular complex;organelle;membrane-bounded organelle;non-membrane-bounded organelle;intracellular organelle;intracellular membrane-bounded organelle;intracellular non-membrane-bounded organelle	GO:0003735;GO:0005198	structural constituent of ribosome;structural molecule activity	GO:0006412;GO:0008152;GO:0009058;GO:0009059;GO:0009987;GO:0019538;GO:0034645;GO:0034960;GO:0034961;GO:0043170;GO:0043283;GO:0043284;GO:0044237;GO:0044238;GO:0044249;GO:0044260;GO:0044267	translation;metabolic process;biosynthetic process;macromolecule biosynthetic process;cellular process;protein metabolic process;cellular macromolecule biosynthetic process;cellular biopolymer metabolic process;cellular biopolymer biosynthetic process	mmu:56282				21.708	201
IPI00480380	IPI00480380	UPF0711 protein C18orf21 homolog		UPF0711 protein C18orf21 homolog	2	2	1	-2.52359	0.000989746	-2.73223	-1.89835	-2.84247	-2.31494	45	27	Q5XFZ0	CR021_MOUSE	ENSMUST00000097646		MGI:1915296	NP_080805										mmu:68046				24.122	217
IPI00113863	IPI00113863;IPI00649059;IPI00420951	Metalloproteinase inhibitor 2;Tissue inhibitor of metalloproteinases 2;Tissue inhibitor of metalloproteinase 2	Timp2;Timp-2;RP23-394O9.2-002	Metalloproteinase inhibitor 2;TIMP metallopeptidase inhibitor 2 precursor;Tissue inhibitor of metalloproteinase 2	2	2	2	-2.50704	0.00106004	-2.33173	-3.18996	-1.52493	-2.68236	15	24	P25785;Q6GXA8;Q6PI17;Q8BSJ3;B1AQJ3	TIMP2_MOUSE;Q6GXA8_MOUSE;B1AQJ3_MOUSE	ENSMUST00000017610	OTTMUSP00000004170;OTTMUSP00000004171	MGI:98753;MGI:98753	NP_035724	PF00965	TIMP	Tissue inhibitor of metalloproteinase	GO:0005604;GO:0009986;GO:0044420;GO:0044421;GO:0044464;GO:0005578;GO:0031012	basement membrane;cell surface;extracellular matrix part;extracellular region part;cell part;proteinaceous extracellular matrix;extracellular matrix	GO:0004857;GO:0004866;GO:0005102;GO:0005178;GO:0005488;GO:0005515;GO:0008047;GO:0008191;GO:0010576;GO:0030234;GO:0030414;GO:0032403;GO:0048551	enzyme inhibitor activity;endopeptidase inhibitor activity;receptor binding;integrin binding;binding;protein binding;enzyme activator activity;metalloendopeptidase inhibitor activity;metalloenzyme regulator activity;enzyme regulator activity	GO:0006140;GO:0008285;GO:0009966;GO:0010627;GO:0010646;GO:0019219;GO:0019222;GO:0030799;GO:0030814;GO:0031323;GO:0042127;GO:0043408;GO:0045595;GO:0045664;GO:0048519;GO:0048523;GO:0050767;GO:0050789;GO:0050793;GO:0050794;GO:0051171;GO:0051239;GO:0051960;GO:0060284;GO:0065007;GO:0080090	regulation of nucleotide metabolic process;negative regulation of cell proliferation;regulation of signal transduction;regulation of protein kinase cascade;regulation of cell communication	mmu:21858				24.328	220
IPI00469219	IPI00469219;IPI00113245	GTP-binding protein era homolog;ERA-W;Conserved ERA-like GTPase;ERA-like GTPase	Eral1;Era	GTP-binding protein era homolog;Era (G-protein)-like 1 (E. coli), isoform CRA_c	3	1	3	-2.50564	0.00106622	-2.80727	-3.13092	-2.20401	-1.8065	48	12	Q9CZU4;Q8R4A6;Q8VE60;Q9ESC5;Q8R4A7;Q9ESC4	ERAL_MOUSE;Q8R4A7_MOUSE	ENSMUST00000021183;ENSMUST00000080426	OTTMUSP00000000112	MGI:1889295;MGI:1889295	NP_071708	PF01926	MMR_HSR1	GTPase of unknown function	GO:0005622;GO:0044464	intracellular;cell part	GO:0000166;GO:0003676;GO:0003723;GO:0005488;GO:0005525;GO:0017076;GO:0019001;GO:0032553;GO:0032555;GO:0032561	nucleotide binding;nucleic acid binding;RNA binding;binding;GTP binding;purine nucleotide binding;guanyl nucleotide binding;ribonucleotide binding;purine ribonucleotide binding;guanyl ribonucleotide binding			mmu:57837				48.186	437
IPI00268030	IPI00268030;IPI00652131	Extracellular sulfatase Sulf-2;MSulf-2;Putative uncharacterized protein;Sulfatase 2	Sulf2;RP23-120P1.2-001	Extracellular sulfatase Sulf-2;Sulfatase 2	5	5	1	-2.50109	0.00108646	-2.61165	-2.83659	-1.31571	-2.39052	60	30	Q8CFG0;Q3TNM3;Q6ZPV3	SULF2_MOUSE;Q3TNM3_MOUSE	ENSMUST00000088086;ENSMUST00000109249	OTTMUSP00000001078;OTTMUSP00000017277	MGI:1919293;MGI:1919293	NP_082348	PF00884	Sulfatase	Sulfatase	GO:0005783;GO:0005795;GO:0009986;GO:0043226;GO:0043227;GO:0043229;GO:0043231;GO:0044422;GO:0044424;GO:0044431;GO:0044444;GO:0044446;GO:0044464;GO:0005794	endoplasmic reticulum;Golgi stack;cell surface;organelle;membrane-bounded organelle;intracellular organelle;intracellular membrane-bounded organelle;organelle part;intracellular part;Golgi apparatus part;cytoplasmic part;intracellular organelle part	GO:0003824;GO:0004065;GO:0005488;GO:0005509;GO:0008484;GO:0016787;GO:0016788;GO:0043167;GO:0043169;GO:0046872	catalytic activity;arylsulfatase activity;binding;calcium ion binding;sulfuric ester hydrolase activity;hydrolase activity;hydrolase activity, acting on ester bonds;ion binding;cation binding;metal ion binding	GO:0008152	metabolic process	mmu:72043			K01138	100.47	875
IPI00556699	IPI00556699;IPI00453724;IPI00755768	Putative uncharacterized protein;Glycine cleavage system H protein, mitochondrial	Gcsh	MCG4364, isoform CRA_b;Glycine cleavage system H protein, mitochondrial;similar to Gcsh protein	2	2	2	-2.47826	0.00119336	-2.46646	-3.18964	-2.21557	-2.49007	30	9	Q9CV53;Q9CY75;Q91WK5	Q9CV53_MOUSE;GCSH_MOUSE	ENSMUST00000040484	OTTMUSP00000034396	MGI:1915383;MGI:1915383	NP_080848;XP_978753	PF01597	GCV_H	Glycine cleavage H-protein	GO:0005960;GO:0032991;GO:0043234;GO:0044424;GO:0044444;GO:0044464;GO:0005739;GO:0043226;GO:0043227;GO:0043229;GO:0043231	glycine cleavage complex;macromolecular complex;protein complex;intracellular part;cytoplasmic part;cell part;mitochondrion;organelle;membrane-bounded organelle;intracellular organelle;intracellular membrane-bounded organelle	GO:0005488;GO:0031405;GO:0031406;GO:0048037;GO:0050662	binding;lipoic acid binding;carboxylic acid binding;cofactor binding;coenzyme binding	GO:0006082;GO:0006519;GO:0006520;GO:0006544;GO:0006546;GO:0006807;GO:0008152;GO:0009056;GO:0009063;GO:0009069;GO:0009071;GO:0009308;GO:0009310;GO:0009987;GO:0016054;GO:0019752;GO:0034641;GO:0042180;GO:0043436;GO:0044106;GO:0044237;GO:0044238;GO:0044248;GO:0044270;GO:0046395	organic acid metabolic process;cellular amino acid and derivative metabolic process;cellular amino acid metabolic process;glycine metabolic process;glycine catabolic process;nitrogen compound metabolic process;metabolic process;catabolic process	mmu:68133				18.637	170
IPI00885495	IPI00885495;IPI00107913	COX assembly mitochondrial protein homolog;Putative uncharacterized protein	Cmc1	COX assembly mitochondrial protein homolog;Putative uncharacterized protein (Fragment)	3	3	3	-2.47494	0.0012097	-2.45723	-1.83561	-2.60893	-2.49265	15	21	Q9CPZ8;Q9CVE7	COXAM_MOUSE;Q9CVE7_MOUSE	ENSMUST00000044220		MGI:1915149;MGI:1915149	NP_080718	PF08583	Cmc1	Cytochrome c oxidase biogenesis protein Cmc1 like	GO:0005739;GO:0043226;GO:0043227;GO:0043229;GO:0043231;GO:0044424;GO:0044444;GO:0044464	mitochondrion;organelle;membrane-bounded organelle;intracellular organelle;intracellular membrane-bounded organelle;intracellular part;cytoplasmic part;cell part	GO:0005488;GO:0005507;GO:0043167;GO:0043169;GO:0046872;GO:0046914	binding;copper ion binding;ion binding;cation binding;metal ion binding;transition metal ion binding			mmu:67899				12.552	106
IPI00228616	IPI00228616	Histone H1.1;H1 VAR.3	Hist1h1a;H1f1	Histone H1.1	6	6	4	-2.46692	0.00125001	-2.49465	-2.83715	-2.43918	-2.36721	60	72	P43275;Q5SZ98	H11_MOUSE	ENSMUST00000055770	OTTMUSP00000000668	MGI:1931523	NP_085112	PF00538	Linker_histone	linker histone H1 and H5 family	GO:0000786;GO:0005634;GO:0032991;GO:0032993;GO:0043226;GO:0043227;GO:0043229;GO:0043231;GO:0044422;GO:0044424;GO:0044427;GO:0044446;GO:0044464	nucleosome;nucleus;macromolecular complex;protein-DNA complex;organelle;membrane-bounded organelle;intracellular organelle;intracellular membrane-bounded organelle;organelle part;intracellular part;chromosomal part;intracellular organelle part;cell part	GO:0003676;GO:0003677;GO:0005488	nucleic acid binding;DNA binding;binding	GO:0006325;GO:0006334;GO:0006996;GO:0007276;GO:0007283;GO:0009987;GO:0010926;GO:0016043;GO:0022414;GO:0022607;GO:0034621;GO:0034622;GO:0034728;GO:0043933;GO:0048232;GO:0051276;GO:0065003;GO:0065004	chromatin organization;nucleosome assembly;organelle organization;gamete generation;spermatogenesis;cellular process;anatomical structure formation;cellular component organization;reproductive process;cellular component assembly	mmu:80838			K11275	21.785	213
IPI00896670	IPI00896670;IPI00110262;IPI00457534;IPI00403106	Sortilin-related VPS10 domain containing receptor 2;VPS10 domain-containing receptor SorCS2	Sorcs2;mCG_142529	VPS10 domain receptor protein SORCS 2 precursor;VPS10 domain-containing receptor SorCS2	3	1	2	-2.46253	0.00127254	-4.22754	-2.29472	-2.63035	0.534795	15	9	B2RSI2;Q3TU45;Q8CHA4;Q9EPR5	B2RSI2_MOUSE;SORC2_MOUSE	ENSMUST00000037370	OTTMUSP00000035234	MGI:1932289;MGI:1932289	NP_112151	PF00801	PKD	PKD domain	GO:0016021;GO:0031224;GO:0044425;GO:0044464	integral to membrane;intrinsic to membrane;membrane part;cell part	GO:0004871;GO:0004872;GO:0060089	signal transducer activity;receptor activity;molecular transducer activity			mmu:81840				128.9	1159
IPI00331555	IPI00331555	2-oxoisovalerate dehydrogenase subunit alpha, mitochondrial;Branched-chain alpha-keto acid dehydrogenase E1 component alpha chain	Bckdha	branched chain keto acid dehydrogenase E1, alpha polypeptide	4	3	2	-2.43954	0.00139699	-1.96173	-2.97514	-2.91734	-1.09666	27	12	P50136;Q3U3J1;Q99L69	ODBA_MOUSE	ENSMUST00000071329		MGI:107701	NP_031559	PF00676	E1_dh	Dehydrogenase E1 component	GO:0005947;GO:0030062;GO:0032991;GO:0043234;GO:0044422;GO:0044424;GO:0044429;GO:0044444;GO:0044446;GO:0044464;GO:0045239;GO:0045240	mitochondrial alpha-ketoglutarate dehydrogenase complex;mitochondrial tricarboxylic acid cycle enzyme complex;macromolecular complex;protein complex;organelle part;intracellular part;mitochondrial part;cytoplasmic part;intracellular organelle part	GO:0003824;GO:0003826;GO:0003863;GO:0005488;GO:0016491;GO:0016536;GO:0016624;GO:0016903;GO:0030234;GO:0030955;GO:0031420;GO:0043167;GO:0043169;GO:0046872	catalytic activity;alpha-ketoacid dehydrogenase activity;3-methyl-2-oxobutanoate dehydrogenase (2-methylpropanoyl-transferring) activity;binding;oxidoreductase activity;cyclin-dependent protein kinase 5 activator regulator activity	GO:0006082;GO:0006355;GO:0006519;GO:0006520;GO:0006807;GO:0008152;GO:0009056;GO:0009063;GO:0009081;GO:0009083;GO:0009308;GO:0009310;GO:0009889;GO:0009891;GO:0009893;GO:0009987;GO:0010468;GO:0010556;GO:0010557;GO:0010604;GO:0010628;GO:0016054;GO:0019219;GO:0019222;GO:0019752;GO:0031323;GO:0031325;GO:0031326;GO:0031328;GO:0034641;GO:0042180;GO:0043436;GO:0044106;GO:0044237;GO:0044238;GO:0044248;GO:…	organic acid metabolic process;regulation of transcription, DNA-dependent;cellular amino acid and derivative metabolic process;cellular amino acid metabolic process;nitrogen compound metabolic process;metabolic process;catabolic process	mmu:12039	ko00280	Valine, leucine and isoleucine degradation	K00166	50.773	446
IPI00222675	IPI00222675;IPI00462142;IPI00474962	Pumilio domain-containing protein KIAA0020	Kiaa0020;D19Bwg1357e	D19Bwg1357e protein	3	3	1	-2.4395	0.0013972	-2.31768	-2.71336	-2.40138	-2.47762	507	321	Q8BKS9	K0020_MOUSE	ENSMUST00000076219		MGI:106253	NP_803425	PF08144	CPL	CPL (NUC119) domain	GO:0005730;GO:0043226;GO:0043228;GO:0043229;GO:0043232;GO:0044422;GO:0044424;GO:0044428;GO:0044446;GO:0044464	nucleolus;organelle;non-membrane-bounded organelle;intracellular organelle;intracellular non-membrane-bounded organelle;organelle part;intracellular part;nuclear part;intracellular organelle part;cell part	GO:0003676;GO:0003723;GO:0005488	nucleic acid binding;RNA binding;binding			mmu:52874				72.93	648
IPI00223714	IPI00223714	Histone H1.4;H1 VAR.2;H1e	Hist1h1e;H1f4	Histone H1.4	6	6	6	-2.43475	0.00142423	-2.71589	-2.67947	-2.062	-2.19004	507	321	P43274	H14_MOUSE	ENSMUST00000062045	OTTMUSP00000000532	MGI:1931527	NP_056602	PF00538	Linker_histone	linker histone H1 and H5 family	GO:0000786;GO:0005634;GO:0032991;GO:0032993;GO:0043226;GO:0043227;GO:0043229;GO:0043231;GO:0044422;GO:0044424;GO:0044427;GO:0044446;GO:0044464	nucleosome;nucleus;macromolecular complex;protein-DNA complex;organelle;membrane-bounded organelle;intracellular organelle;intracellular membrane-bounded organelle;organelle part;intracellular part;chromosomal part;intracellular organelle part;cell part	GO:0003676;GO:0003677;GO:0005488;GO:0005515	nucleic acid binding;DNA binding;binding;protein binding	GO:0006325;GO:0006333;GO:0006334;GO:0006996;GO:0009987;GO:0010926;GO:0016043;GO:0016584;GO:0022607;GO:0031497;GO:0034621;GO:0034622;GO:0034728;GO:0043933;GO:0051276;GO:0065003;GO:0065004	chromatin organization;chromatin assembly or disassembly;nucleosome assembly;organelle organization;cellular process;anatomical structure formation;cellular component organization;nucleosome positioning;cellular component assembly;chromatin assembly	mmu:50709			K11275	21.977	219
IPI00828463	IPI00828463;IPI00125382	Putative uncharacterized protein;Nucleolar complex protein 2 homolog;NOC2-like	Noc2l	nucleolar complex associated 2 homolog;Nucleolar complex protein 2 homolog	5	5	2	-2.43223	0.00143879	-2.22883	-2.40827	-2.45619	-2.74845	87	60	Q3UZI6;Q8BHX6;Q9WV70	Q3UZI6_MOUSE;NOC2L_MOUSE			MGI:1931051;MGI:1931051	NP_067278	PF03715	Noc2	Noc2p family	GO:0005730;GO:0043226;GO:0043228;GO:0043229;GO:0043232;GO:0044422;GO:0044424;GO:0044428;GO:0044446;GO:0044464	nucleolus;organelle;non-membrane-bounded organelle;intracellular organelle;intracellular non-membrane-bounded organelle;organelle part;intracellular part;nuclear part;intracellular organelle part;cell part					mmu:57741				85.637	750
IPI00132762	IPI00132762	Heat shock protein 75 kDa, mitochondrial;Tumor necrosis factor type 1 receptor-associated protein;TNFR-associated protein 1	Trap1;Hsp75	Heat shock protein 75 kDa, mitochondrial	12	10	10	-2.43023	0.00145043	-2.49592	-3.10735	-2.36454	-2.11179	18	15	Q9CQN1;Q3TK29;Q3TSG8;Q3UPJ8;Q922R9;Q922Z3	TRAP1_MOUSE	ENSMUST00000006137	OTTMUSP00000021685	MGI:1915265	NP_080784	PF02518;PF00183	HATPase_c;HSP90	Histidine kinase-, DNA gyrase B-, and HSP90-like ATPase;Hsp90 protein	GO:0005739;GO:0043226;GO:0043227;GO:0043229;GO:0043231;GO:0044424;GO:0044444;GO:0044464	mitochondrion;organelle;membrane-bounded organelle;intracellular organelle;intracellular membrane-bounded organelle;intracellular part;cytoplasmic part;cell part	GO:0000166;GO:0001882;GO:0001883;GO:0005488;GO:0005515;GO:0005524;GO:0017076;GO:0030554;GO:0032553;GO:0032555;GO:0032559;GO:0051082	nucleotide binding;nucleoside binding;purine nucleoside binding;binding;protein binding;ATP binding;purine nucleotide binding;adenyl nucleotide binding;ribonucleotide binding;purine ribonucleotide binding;adenyl ribonucleotide binding	GO:0006457;GO:0006950;GO:0008152;GO:0009987;GO:0019538;GO:0034960;GO:0043170;GO:0043283;GO:0044237;GO:0044238;GO:0044260;GO:0044267;GO:0050896	protein folding;response to stress;metabolic process;cellular process;protein metabolic process;cellular biopolymer metabolic process;macromolecule metabolic process;biopolymer metabolic process;cellular metabolic process;primary metabolic process	mmu:68015			K09488	80.208	706
IPI00653931	IPI00653931;IPI00310035;IPI00856685	Putative uncharacterized protein;Fumarylacetoacetase;Fumarylacetoacetate hydrolase;Beta-diketonase	Fah	fumarylacetoacetate hydrolase;Fumarylacetoacetase	5	5	2	-2.39488	0.00167091	-2.64869	-4.1297	-1.73731	-2.14106	141	72	Q3TY87;P35505	Q3TY87_MOUSE;FAAA_MOUSE	ENSMUST00000032865	OTTMUSP00000030308	MGI:95482;MGI:95482	NP_034306	PF09298;PF01557	DUF1969;FAA_hydrolase	Domain of unknown function (DUF1969);Fumarylacetoacetate (FAA) hydrolase family			GO:0003824;GO:0004334;GO:0016787;GO:0016822;GO:0016823;GO:0000287;GO:0005488;GO:0005509;GO:0043167;GO:0043169;GO:0046872	catalytic activity;fumarylacetoacetase activity;hydrolase activity;hydrolase activity, acting on acid carbon-carbon bonds;hydrolase activity, acting on acid carbon-carbon bonds, in ketonic substances;magnesium ion binding;binding;calcium ion binding	GO:0006082;GO:0006519;GO:0006520;GO:0006525;GO:0006527;GO:0006725;GO:0006807;GO:0008152;GO:0009056;GO:0009063;GO:0009064;GO:0009065;GO:0009072;GO:0009308;GO:0009310;GO:0009987;GO:0016054;GO:0019752;GO:0034641;GO:0042180;GO:0043436;GO:0044106;GO:0044237;GO:0044238;GO:0044248;GO:0044270;GO:0046395;GO:0006558;GO:0006559;GO:0006570;GO:0006572;GO:0009074;GO:0019439	organic acid metabolic process;cellular amino acid and derivative metabolic process;cellular amino acid metabolic process;arginine metabolic process;arginine catabolic process;cellular aromatic compound metabolic process	mmu:14085	ko00350;ko00643	Tyrosine metabolism;Styrene degradation	K01555	46.175	419
IPI00752412	IPI00752412;IPI00122048;IPI00877215;IPI00268145	ATPase, Na+/K+ transporting, alpha 3 polypeptide;ATPase, Na+/K+ transporting, alpha 3 polypeptide, isoform CRA_c;Sodium/potassium-transporting ATPase subunit alpha-3;Na(+)/K(+) ATPase alpha-3 subunit;Na(+)/K(+) ATPase alpha(III) subunit	Atp1a3;mCG_7257	ATPase, Na+/K+ transporting, alpha 3 polypeptide, isoform CRA_c;Sodium/potassium-transporting ATPase subunit alpha-3	20	20	8	-2.38942	0.00170755	-2.93577	-2.66805	-2.11078	-1.34096	162	102	Q8VCE0;Q6PIC6;Q8CGD9;Q8R0B0;Q8R0E8	Q8VCE0_MOUSE;AT1A3_MOUSE	ENSMUST00000102858;ENSMUST00000080882	OTTMUSP00000017755;OTTMUSP00000017754	MGI:88107;MGI:88107	NP_659170	PF00689;PF00690;PF00122;PF00702	Cation_ATPase_C;Cation_ATPase_N;E1-E2_ATPase;Hydrolase	Cation transporting ATPase, C-terminus;Cation transporter/ATPase, N-terminus;E1-E2 ATPase;haloacid dehalogenase-like hydrolase	GO:0005634;GO:0005737;GO:0016021;GO:0031224;GO:0043226;GO:0043227;GO:0043229;GO:0043231;GO:0044424;GO:0044425;GO:0044464;GO:0005783;GO:0005794;GO:0005886;GO:0016020;GO:0044444	nucleus;cytoplasm;integral to membrane;intrinsic to membrane;organelle;membrane-bounded organelle;intracellular organelle;intracellular membrane-bounded organelle;intracellular part;membrane part;cell part;endoplasmic reticulum;Golgi apparatus	GO:0000166;GO:0001882;GO:0001883;GO:0003824;GO:0005215;GO:0005488;GO:0005524;GO:0008324;GO:0015075;GO:0015077;GO:0015399;GO:0015405;GO:0015662;GO:0016462;GO:0016787;GO:0016817;GO:0016818;GO:0016820;GO:0016887;GO:0017076;GO:0017111;GO:0022804;GO:0022857;GO:0022890;GO:0022891;GO:0022892;GO:0030554;GO:0032553;GO:0032555;GO:0032559;GO:0042623;GO:0042625;GO:0042626;GO:0043492;GO:0000287;GO:0005391;GO:…	nucleotide binding;nucleoside binding;purine nucleoside binding;catalytic activity;transporter activity;binding;ATP binding;cation transmembrane transporter activity;ion transmembrane transporter activity	GO:0003008;GO:0006139;GO:0006163;GO:0006164;GO:0006753;GO:0006754;GO:0006807;GO:0006810;GO:0006811;GO:0006812;GO:0006873;GO:0006885;GO:0006928;GO:0007154;GO:0007165;GO:0007166;GO:0007215;GO:0007610;GO:0007611;GO:0007612;GO:0007613;GO:0007626;GO:0007632;GO:0008152;GO:0008344;GO:0008542;GO:0009058;GO:0009117;GO:0009141;GO:0009142;GO:0009144;GO:0009145;GO:0009150;GO:0009152;GO:0009165;GO:0009199;GO:…	system process;nucleobase, nucleoside, nucleotide and nucleic acid metabolic process;purine nucleotide metabolic process;purine nucleotide biosynthetic process;nucleoside phosphate metabolic process;ATP biosynthetic process	mmu:232975	ko04260	Cardiac muscle contraction	K01539	115.97	1053
IPI00119632	IPI00119632	Putative rRNA methyltransferase 3;rRNA (uridine-2'-O-)-methyltransferase 3	Ftsj3	Putative rRNA methyltransferase 3	11	11	7	-2.38337	0.00174902	-2.27463	-3.11585	-2.06387	-2.4921	90	30	Q9DBE9;B1ARK1	RRMJ3_MOUSE	ENSMUST00000021048	OTTMUSP00000003276	MGI:1860295	NP_079586	PF01728;PF07780	FtsJ;Spb1_C	FtsJ-like methyltransferase;Spb1 C-terminal domain	GO:0005730;GO:0043226;GO:0043228;GO:0043229;GO:0043232;GO:0044422;GO:0044424;GO:0044428;GO:0044446;GO:0044464	nucleolus;organelle;non-membrane-bounded organelle;intracellular organelle;intracellular non-membrane-bounded organelle;organelle part;intracellular part;nuclear part;intracellular organelle part;cell part	GO:0003676;GO:0003824;GO:0005488;GO:0008168;GO:0016740;GO:0016741	nucleic acid binding;catalytic activity;binding;methyltransferase activity;transferase activity;transferase activity, transferring one-carbon groups	GO:0000154;GO:0001510;GO:0006139;GO:0006364;GO:0006396;GO:0006730;GO:0006807;GO:0008152;GO:0009451;GO:0009987;GO:0016070;GO:0016072;GO:0031167;GO:0032259;GO:0034470;GO:0034660;GO:0034960;GO:0043170;GO:0043283;GO:0043412;GO:0043414;GO:0044237;GO:0044238;GO:0044260	rRNA modification;RNA methylation;nucleobase, nucleoside, nucleotide and nucleic acid metabolic process;rRNA processing;RNA processing;one-carbon metabolic process;nitrogen compound metabolic process;metabolic process;RNA modification;cellular process	mmu:56095				95.531	838
IPI00129141	IPI00129141	WD repeat-containing protein 46;WD repeat-containing protein BING4	Wdr46;Bing4	WD repeat-containing protein 46	3	3	2	-2.35268	0.0019738	-2.80038	-1.17883	-2.84748	-1.90497	63	36	Q9Z0H1;Q3UM80;Q8CEZ3;Q8R0T3	WDR46_MOUSE	ENSMUST00000025170		MGI:1931871	NP_065628	PF08149;PF00400	BING4CT;WD40	BING4CT (NUC141) domain;WD domain, G-beta repeat							mmu:57315				69.047	622
IPI00117642	IPI00117642	Nucleolar GTP-binding protein 1;Chronic renal failure gene protein;GTP-binding protein NGB	Gtpbp4;Crfg;Nog1	Nucleolar GTP-binding protein 1	7	6	3	-2.35243	0.00197567	-2.18793	-2.15123	-2.51694	-2.83829	27	18	Q99ME9;Q3TPJ4;Q3UR29;Q8CCQ5	NOG1_MOUSE	ENSMUST00000021574		MGI:1916487	NP_081276	PF06858;PF08155	NOG1;NOGCT	Nucleolar GTP-binding protein 1 (NOG1);NOGCT (NUC087) domain	GO:0005730;GO:0043226;GO:0043228;GO:0043229;GO:0043232;GO:0044422;GO:0044424;GO:0044428;GO:0044444;GO:0044446;GO:0044464;GO:0048471	nucleolus;organelle;non-membrane-bounded organelle;intracellular organelle;intracellular non-membrane-bounded organelle;organelle part;intracellular part;nuclear part;cytoplasmic part;intracellular organelle part;cell part;perinuclear region of cytoplasm	GO:0000166;GO:0003824;GO:0003924;GO:0005488;GO:0005525;GO:0016462;GO:0016787;GO:0016817;GO:0016818;GO:0017076;GO:0017111;GO:0019001;GO:0032553;GO:0032555;GO:0032561	nucleotide binding;catalytic activity;GTPase activity;binding;GTP binding;pyrophosphatase activity;hydrolase activity;hydrolase activity, acting on acid anhydrides;hydrolase activity, acting on acid anhydrides, in phosphorus-containing anhydrides	GO:0000079;GO:0006275;GO:0007162;GO:0008152;GO:0008156;GO:0008285;GO:0009889;GO:0009890;GO:0009892;GO:0009987;GO:0010468;GO:0010556;GO:0010558;GO:0010605;GO:0010608;GO:0019219;GO:0019220;GO:0019222;GO:0019538;GO:0022407;GO:0022408;GO:0022613;GO:0030155;GO:0030334;GO:0030336;GO:0031323;GO:0031324;GO:0031326;GO:0031327;GO:0031396;GO:0031397;GO:0031399;GO:0031400;GO:0031647;GO:0032091;GO:0032268;GO:…	regulation of cyclin-dependent protein kinase activity;regulation of DNA replication;negative regulation of cell adhesion;metabolic process;negative regulation of DNA replication;negative regulation of cell proliferation;regulation of biosynthetic process	mmu:69237				74.112	634
IPI00468203	IPI00468203;IPI00605518;IPI00885292;IPI00885367;IPI00885455	Annexin A2;Annexin-2;Annexin II;Lipocortin II;Calpactin I heavy chain;Chromobindin-8;p36;Protein I;Placental anticoagulant protein IV	Anxa2;Anx2;Cal1h;CT009708.1-003;CT009708.1-004;CT009708.1-005	Annexin A2;similar to Annexin A2;Annexin A2;Annexin A2;Annexin A2	7	6	5	-2.33636	0.0021037	-2.30185	-2.37088	-2.20182	-2.38856	45	33	P07356;Q3UCD3;Q542G9;Q99KH3;Q9CZI7;B0V2N7;B0V2N8;B0V2N5	ANXA2_MOUSE;B0V2N7_MOUSE;B0V2N8_MOUSE;B0V2N5_MOUSE	ENSMUST00000034756	OTTMUSP00000040269;OTTMUSP00000040270;OTTMUSP00000040271;OTTMUSP00000040272	MGI:88246	NP_031611;XP_001474833	PF00191	Annexin	Annexin	GO:0005604;GO:0005615;GO:0005768;GO:0005769;GO:0005886;GO:0016020;GO:0016023;GO:0031410;GO:0031982;GO:0031988;GO:0042383;GO:0042470;GO:0043226;GO:0043227;GO:0043229;GO:0043231;GO:0044420;GO:0044421;GO:0044424;GO:0044444;GO:0044464;GO:0048770;GO:0032991;GO:0043234;GO:0048471	basement membrane;extracellular space;endosome;early endosome;plasma membrane;membrane;cytoplasmic membrane-bounded vesicle;cytoplasmic vesicle;vesicle;membrane-bounded vesicle;sarcolemma;melanosome;organelle;membrane-bounded organelle	GO:0004857;GO:0004859;GO:0005488;GO:0005509;GO:0005515;GO:0005543;GO:0005544;GO:0008092;GO:0008289;GO:0030234;GO:0043167;GO:0043169;GO:0046872;GO:0055102;GO:0005546;GO:0035091	enzyme inhibitor activity;phospholipase inhibitor activity;binding;calcium ion binding;protein binding;phospholipid binding;calcium-dependent phospholipid binding;cytoskeletal protein binding;lipid binding;enzyme regulator activity;ion binding	GO:0001525;GO:0009987;GO:0010926;GO:0016043;GO:0030193;GO:0030195;GO:0030198;GO:0030199;GO:0032101;GO:0032502;GO:0042730;GO:0043062;GO:0048519;GO:0048583;GO:0048646;GO:0050789;GO:0050818;GO:0050819;GO:0051239;GO:0051241;GO:0065007;GO:0080134	angiogenesis;cellular process;anatomical structure formation;cellular component organization;regulation of blood coagulation;negative regulation of blood coagulation;extracellular matrix organization;collagen fibril organization	mmu:12306				38.676	339
IPI00403280	IPI00403280;IPI00855165;IPI00117277;IPI00762483	Putative uncharacterized protein;Lrrfip1 protein;Leucine-rich repeat flightless-interacting protein 1;LRR FLII-interacting protein 1;FLI-LRR-associated protein 1;H186 FLAP	Lrrfip1;Flap	Putative uncharacterized protein (Fragment);Lrrfip1 protein;Isoform 2 of Leucine-rich repeat flightless-interacting protein 1;leucine rich repeat (in FLII) interacting protein 1 isoform 3	2	2	1	-2.32134	0.00223009	-3.53867	-0.573683	-1.10401	-5.55556	198	176	Q8BLM1;A6H5U5;Q3UZ39-2;Q3UZ39;Q8BLV4	Q8BLM1_MOUSE;A6H5U5_MOUSE;LRRF1_MOUSE;Q8BLV4_MOUSE	ENSMUST00000068167;ENSMUST00000097649;ENSMUST00000097650;ENSMUST00000068116		MGI:1342770;MGI:1342770;MGI:1342770;MGI:1342770	NP_032541;NP_001104782	PF09738	DUF2051	Double stranded RNA binding protein (DUF2051)	GO:0005634;GO:0005737;GO:0043226;GO:0043227;GO:0043229;GO:0043231;GO:0044424;GO:0044464	nucleus;cytoplasm;organelle;membrane-bounded organelle;intracellular organelle;intracellular membrane-bounded organelle;intracellular part;cell part	GO:0003676;GO:0003677;GO:0005488;GO:0005515	nucleic acid binding;DNA binding;binding;protein binding	GO:0006139;GO:0006350;GO:0006355;GO:0006807;GO:0008152;GO:0009058;GO:0009059;GO:0009889;GO:0009987;GO:0010468;GO:0010556;GO:0019219;GO:0019222;GO:0031323;GO:0031326;GO:0034645;GO:0034960;GO:0034961;GO:0043170;GO:0043283;GO:0043284;GO:0044237;GO:0044238;GO:0044249;GO:0044260;GO:0045449;GO:0050789;GO:0050794;GO:0051171;GO:0051252;GO:0060255;GO:0065007;GO:0080090	nucleobase, nucleoside, nucleotide and nucleic acid metabolic process;transcription;regulation of transcription, DNA-dependent;nitrogen compound metabolic process;metabolic process;biosynthetic process;macromolecule biosynthetic process	mmu:16978				36.776	321
IPI00223713	IPI00223713;IPI00319556	Histone H1.2;H1 VAR.1;H1c	Hist1h1c;H1f2	Histone H1.2	3	3	3	-2.29837	0.00243669	-2.60611	-2.63385	-1.95399	-1.99064	507	321	P15864;Q3UXH2;Q5SZA3	H12_MOUSE	ENSMUST00000040914	OTTMUSP00000000652	MGI:1931526	NP_056601	PF00538	Linker_histone	linker histone H1 and H5 family	GO:0000786;GO:0005634;GO:0032991;GO:0032993;GO:0043226;GO:0043227;GO:0043229;GO:0043231;GO:0044422;GO:0044424;GO:0044427;GO:0044446;GO:0044464	nucleosome;nucleus;macromolecular complex;protein-DNA complex;organelle;membrane-bounded organelle;intracellular organelle;intracellular membrane-bounded organelle;organelle part;intracellular part;chromosomal part;intracellular organelle part;cell part	GO:0003676;GO:0003677;GO:0005488;GO:0005515	nucleic acid binding;DNA binding;binding;protein binding	GO:0006325;GO:0006333;GO:0006334;GO:0006996;GO:0009987;GO:0010926;GO:0016043;GO:0016584;GO:0022607;GO:0031497;GO:0034621;GO:0034622;GO:0034728;GO:0043933;GO:0051276;GO:0065003;GO:0065004	chromatin organization;chromatin assembly or disassembly;nucleosome assembly;organelle organization;cellular process;anatomical structure formation;cellular component organization;nucleosome positioning;cellular component assembly;chromatin assembly	mmu:50708			K11275	21.266	212
IPI00471246	IPI00471246	Isovaleryl-CoA dehydrogenase, mitochondrial	Ivd	Isovaleryl-CoA dehydrogenase, mitochondrial	12	11	11	-2.29446	0.00247358	-2.48594	-2.82568	-2.02462	-2.10297	507	459	Q9JHI5;A3KGG9	IVD_MOUSE	ENSMUST00000028807	OTTMUSP00000015718	MGI:1929242	NP_062800	PF00441;PF02770;PF02771	Acyl-CoA_dh_1;Acyl-CoA_dh_M;Acyl-CoA_dh_N	Acyl-CoA dehydrogenase, C-terminal domain;Acyl-CoA dehydrogenase, middle domain;Acyl-CoA dehydrogenase, N-terminal domain	GO:0005759;GO:0044422;GO:0044424;GO:0044429;GO:0044444;GO:0044446;GO:0044464	mitochondrial matrix;organelle part;intracellular part;mitochondrial part;cytoplasmic part;intracellular organelle part;cell part	GO:0000166;GO:0001882;GO:0001883;GO:0003824;GO:0003995;GO:0005488;GO:0008470;GO:0009055;GO:0016491;GO:0016627;GO:0017076;GO:0030554;GO:0048037;GO:0050660;GO:0050662	nucleotide binding;nucleoside binding;purine nucleoside binding;catalytic activity;acyl-CoA dehydrogenase activity;binding;isovaleryl-CoA dehydrogenase activity;electron carrier activity;oxidoreductase activity	GO:0008152;GO:0055114	metabolic process;oxidation reduction	mmu:56357	ko00280	Valine, leucine and isoleucine degradation	K00253	46.325	424
IPI00134746	IPI00134746;IPI00457825	Argininosuccinate synthase;Citrulline--aspartate ligase	Ass1;Ass	Argininosuccinate synthase;47 kDa protein	18	17	14	-2.28664	0.00254874	-2.17438	-2.39891	-2.00451	-2.87115	117	138	P16460;Q3UEJ7;Q3UJ34	ASSY_MOUSE	ENSMUST00000102840	OTTMUSP00000013008	MGI:88090	NP_031520	PF00764	Arginosuc_synth	Arginosuccinate synthase	GO:0005739;GO:0043226;GO:0043227;GO:0043229;GO:0043231;GO:0044424;GO:0044444;GO:0044464	mitochondrion;organelle;membrane-bounded organelle;intracellular organelle;intracellular membrane-bounded organelle;intracellular part;cytoplasmic part;cell part	GO:0000166;GO:0001882;GO:0001883;GO:0003824;GO:0004055;GO:0005488;GO:0005524;GO:0016874;GO:0016879;GO:0017076;GO:0030554;GO:0032553;GO:0032555;GO:0032559	nucleotide binding;nucleoside binding;purine nucleoside binding;catalytic activity;argininosuccinate synthase activity;binding;ATP binding;ligase activity;ligase activity, forming carbon-nitrogen bonds;purine nucleotide binding;adenyl nucleotide binding	GO:0000050;GO:0006082;GO:0006519;GO:0006520;GO:0006525;GO:0006526;GO:0006807;GO:0008152;GO:0008652;GO:0009058;GO:0009064;GO:0009084;GO:0009308;GO:0009309;GO:0009987;GO:0016053;GO:0019627;GO:0019752;GO:0034641;GO:0042180;GO:0043436;GO:0043603;GO:0043604;GO:0044106;GO:0044237;GO:0044238;GO:0044249;GO:0044271;GO:0046394	urea cycle;organic acid metabolic process;cellular amino acid and derivative metabolic process;cellular amino acid metabolic process;arginine metabolic process;arginine biosynthetic process;nitrogen compound metabolic process;metabolic process	mmu:11898	ko00252;ko00330	Alanine and aspartate metabolism;Arginine and proline metabolism	K01940	46.584	412
IPI00407499	IPI00407499;IPI00227445;IPI00606168;IPI00856229	4-aminobutyrate aminotransferase, mitochondrial;Gamma-amino-N-butyrate transaminase;GABA aminotransferase;L-AIBAT;(S)-3-amino-2-methylpropionate transaminase	Abat;Gabat	Isoform 1 of 4-aminobutyrate aminotransferase, mitochondrial;Isoform 2 of 4-aminobutyrate aminotransferase, mitochondrial	6	4	4	-2.27779	0.00263636	-2.46325	-3.42327	-1.81949	-2.09234	156	99	P61922-1;P61922;Q3V1S0;P61922-2;Q3U0M2	GABT_MOUSE	ENSMUST00000065987;ENSMUST00000115839	OTTMUSP00000031702;OTTMUSP00000032187	MGI:2443582;MGI:2443582	NP_766549;NP_001164449	PF00202	Aminotran_3	Aminotransferase class-III	GO:0005759;GO:0032144;GO:0032991;GO:0043234;GO:0044422;GO:0044424;GO:0044429;GO:0044444;GO:0044446;GO:0044464	mitochondrial matrix;4-aminobutyrate transaminase complex;macromolecular complex;protein complex;organelle part;intracellular part;mitochondrial part;cytoplasmic part;intracellular organelle part;cell part	GO:0003824;GO:0003867;GO:0005488;GO:0005496;GO:0005515;GO:0008289;GO:0008483;GO:0016740;GO:0016769;GO:0019842;GO:0019899;GO:0030170;GO:0032145;GO:0042802;GO:0042803;GO:0046983;GO:0047298;GO:0048037;GO:0070279	catalytic activity;4-aminobutyrate transaminase activity;binding;steroid binding;protein binding;lipid binding;transaminase activity;transferase activity;transferase activity, transferring nitrogenous groups;vitamin binding;enzyme binding	GO:0001505;GO:0006082;GO:0006519;GO:0006575;GO:0006629;GO:0006631;GO:0006807;GO:0007610;GO:0008152;GO:0009056;GO:0009308;GO:0009448;GO:0009987;GO:0010033;GO:0014070;GO:0014073;GO:0019605;GO:0019752;GO:0030534;GO:0032501;GO:0032787;GO:0042133;GO:0042135;GO:0042180;GO:0042220;GO:0042221;GO:0043279;GO:0043436;GO:0044237;GO:0044238;GO:0044248;GO:0044255;GO:0046459;GO:0048148;GO:0050896;GO:0065007;GO:…	regulation of neurotransmitter levels;organic acid metabolic process;cellular amino acid and derivative metabolic process;cellular amino acid derivative metabolic process;lipid metabolic process;fatty acid metabolic process	mmu:268860	ko00640;ko00650;ko00251;ko00252;ko00410	Propanoate metabolism;Butanoate metabolism;Glutamate metabolism;Alanine and aspartate metabolism;beta-Alanine metabolism	K00823	56.451	500
IPI00130246	IPI00130246;IPI00944058;IPI00895017	Ribosomal RNA processing protein 1 homolog B;RRP1-like protein B	Rrp1b	Ribosomal RNA processing protein 1 homolog B;ribosomal RNA processing 1 homolog B isoform 2	6	6	4	-2.25594	0.0028645	-2.35151	-2.32425	-2.18762	-0.581903	591	598	Q91YK2;Q6ZQH4	RRP1B_MOUSE	ENSMUST00000081339	OTTMUSP00000041177	MGI:1919712	NP_082520;NP_001157206	PF05997	Nop52	Nucleolar protein,Nop52	GO:0005730;GO:0030529;GO:0030684;GO:0030688;GO:0032991;GO:0043226;GO:0043228;GO:0043229;GO:0043232;GO:0044422;GO:0044424;GO:0044428;GO:0044446;GO:0044464	nucleolus;ribonucleoprotein complex;preribosome;preribosome, small subunit precursor;macromolecular complex;organelle;non-membrane-bounded organelle;intracellular organelle;intracellular non-membrane-bounded organelle;organelle part;intracellular part	GO:0005488;GO:0005515	binding;protein binding	GO:0006139;GO:0006364;GO:0006396;GO:0006807;GO:0008152;GO:0009987;GO:0016070;GO:0016072;GO:0034470;GO:0034660;GO:0034960;GO:0043170;GO:0043283;GO:0044237;GO:0044238;GO:0044260	nucleobase, nucleoside, nucleotide and nucleic acid metabolic process;rRNA processing;RNA processing;nitrogen compound metabolic process;metabolic process;cellular process;RNA metabolic process;rRNA metabolic process;ncRNA processing	mmu:72462				80.581	724
IPI00221690	IPI00221690;IPI00607974	Protein MAK16 homolog;Protein RBM13	Mak16;Rbm13	Isoform 1 of Protein MAK16 homolog;Isoform 2 of Protein MAK16 homolog	4	4	2	-2.25352	0.00289084	-2.38871	-1.27147	-2.90506	-2.11833	507	321	Q8BGS0-1;Q8BGS0;Q8BGS0-2	MAK16_MOUSE	ENSMUST00000033983		MGI:1915170;MGI:1915170	NP_080729	PF04874	Mak16	Mak16 protein	GO:0005730;GO:0043226;GO:0043228;GO:0043229;GO:0043232;GO:0044422;GO:0044424;GO:0044428;GO:0044446;GO:0044464	nucleolus;organelle;non-membrane-bounded organelle;intracellular organelle;intracellular non-membrane-bounded organelle;organelle part;intracellular part;nuclear part;intracellular organelle part;cell part					mmu:67920				35.185	296
IPI00129096	IPI00129096	Pyridoxine-5'-phosphate oxidase;Pyridoxamine-phosphate oxidase	Pnpo	Pyridoxine-5'-phosphate oxidase	2	2	2	-2.24409	0.00299541	-2.10489	-2.39188	-2.32723	-2.16096	63	36	Q91XF0	PNPO_MOUSE	ENSMUST00000018803	OTTMUSP00000001651	MGI:2144151	NP_598782	PF10590;PF01243	PNPOx_C;Pyridox_oxidase	Pyridoxine 5'-phosphate oxidase C-terminal dimerisation region;Pyridoxamine 5'-phosphate oxidase			GO:0000166;GO:0003824;GO:0004733;GO:0005488;GO:0005529;GO:0010181;GO:0016491;GO:0016638;GO:0016641;GO:0030246;GO:0048029;GO:0048037;GO:0050662	nucleotide binding;catalytic activity;pyridoxamine-phosphate oxidase activity;binding;sugar binding;FMN binding;oxidoreductase activity;oxidoreductase activity, acting on the CH-NH2 group of donors	GO:0006766;GO:0006767;GO:0008152;GO:0008614;GO:0008615;GO:0009058;GO:0009110;GO:0009987;GO:0042364;GO:0042816;GO:0042819;GO:0044237;GO:0044249;GO:0046483;GO:0055114	vitamin metabolic process;water-soluble vitamin metabolic process;metabolic process;pyridoxine metabolic process;pyridoxine biosynthetic process;biosynthetic process;vitamin biosynthetic process;cellular process;water-soluble vitamin biosynthetic process	mmu:103711	ko00750	Vitamin B6 metabolism	K00275	30.114	261
IPI00930808	IPI00930808;IPI00124677	Notchless homolog 1 (Drosophila);Notchless protein homolog 1	Nle1;RP23-392I13.2-001	Notchless gene homolog;Notchless protein homolog 1	3	3	1	-2.24186	0.00302066	-1.8052	-2.67846	-1.80527	-2.78509	9	15	B1ARD5;Q3TC83;Q3URT5;Q8VEJ4	B1ARD5_MOUSE;NLE1_MOUSE	ENSMUST00000103213	OTTMUSP00000000840	MGI:2429770;MGI:2429770	NP_663406	PF08154;PF00400	NLE;WD40	NLE (NUC135) domain;WD domain, G-beta repeat	GO:0005730;GO:0043226;GO:0043228;GO:0043229;GO:0043232;GO:0044422;GO:0044424;GO:0044428;GO:0044446;GO:0044464	nucleolus;organelle;non-membrane-bounded organelle;intracellular organelle;intracellular non-membrane-bounded organelle;organelle part;intracellular part;nuclear part;intracellular organelle part;cell part			GO:0001826;GO:0007154;GO:0007165;GO:0007166;GO:0007219;GO:0009987;GO:0030154;GO:0032502;GO:0048869;GO:0050789;GO:0050794;GO:0065007	inner cell mass cell differentiation;cell communication;signal transduction;cell surface receptor linked signal transduction;Notch signaling pathway;cellular process;cell differentiation;developmental process;cellular developmental process	mmu:217011				53.133	485
IPI00169608	IPI00169608	Rho GTPase-activating protein 18;Rho-type GTPase-activating protein 18	Arhgap18	Rho GTPase-activating protein 18	3	3	2	-2.22524	0.00321494	-2.39604	-2.81942	-2.05444	-1.27651	15	6	Q8K0Q5	RHG18_MOUSE	ENSMUST00000039557	OTTMUSP00000028606	MGI:1921160	NP_789807	PF00620	RhoGAP	RhoGAP domain	GO:0005622;GO:0044464	intracellular;cell part	GO:0005096;GO:0008047;GO:0030234;GO:0030695;GO:0060589	GTPase activator activity;enzyme activator activity;enzyme regulator activity;GTPase regulator activity;nucleoside-triphosphatase regulator activity	GO:0007154;GO:0007165;GO:0009987;GO:0050789;GO:0050794;GO:0065007	cell communication;signal transduction;cellular process;regulation of biological process;regulation of cellular process;biological regulation	mmu:73910				74.929	663
IPI00126805	IPI00126805;IPI00885940	DnaJ homolog subfamily C member 12;J domain-containing protein 1;Putative uncharacterized protein	Dnajc12;Jdp1	DnaJ homolog subfamily C member 12;Putative uncharacterized protein	7	6	5	-2.21151	0.00338385	-2.1139	-2.31366	-1.83735	-2.30913	72	48	Q9R022;Q9CWA0;Q8CCS1	DJC12_MOUSE;Q8CCS1_MOUSE	ENSMUST00000043317	OTTMUSP00000040087;OTTMUSP00000040088	MGI:1353428	NP_038916	PF00226	DnaJ	DnaJ domain			GO:0005488;GO:0005515;GO:0031072	binding;protein binding;heat shock protein binding			mmu:30045			K09532	22.852	198
IPI00459381	IPI00459381;IPI00830815	ATP-dependent RNA helicase DDX18;DEAD box protein 18	Ddx18	ATP-dependent RNA helicase DDX18	7	5	5	-2.20959	0.00340819	-2.14778	-2.32898	-2.2012	-2.21797	261	186	Q8K363;B2RUM8;Q9CSG7;Q9CSJ2	DDX18_MOUSE	ENSMUST00000001724	OTTMUSP00000021484	MGI:1914192	NP_080136	PF00270;PF00271	DEAD;Helicase_C	DEAD/DEAH box helicase;Helicase conserved C-terminal domain			GO:0000166;GO:0001882;GO:0001883;GO:0003676;GO:0003723;GO:0003824;GO:0004386;GO:0005488;GO:0005524;GO:0008026;GO:0016462;GO:0016787;GO:0016817;GO:0016818;GO:0016887;GO:0017076;GO:0017111;GO:0030554;GO:0032553;GO:0032555;GO:0032559;GO:0042623;GO:0070035	nucleotide binding;nucleoside binding;purine nucleoside binding;nucleic acid binding;RNA binding;catalytic activity;helicase activity;binding;ATP binding;ATP-dependent helicase activity;pyrophosphatase activity;hydrolase activity			mmu:66942	ko00790	Folate biosynthesis	K01529	74.18	660
IPI00875943	IPI00875943;IPI00223875	L-asparaginase;L-asparagine amidohydrolase;Asparaginase-like protein 1	Asrgl1	36 kDa protein;L-asparaginase	4	4	3	-2.20573	0.00345738	-1.91474	-2.49671	-1.40125	-2.68755	507	321	Q8C0M9	ASGL1_MOUSE	ENSMUST00000049948;ENSMUST00000113181	OTTMUSP00000035789	MGI:1913764	NP_079886	PF01112	Asparaginase_2	Asparaginase	GO:0005737;GO:0044424;GO:0044464	cytoplasm;intracellular part;cell part	GO:0003824;GO:0003948;GO:0004067;GO:0016787;GO:0016810;GO:0016811	catalytic activity;N4-(beta-N-acetylglucosaminyl)-L-asparaginase activity;asparaginase activity;hydrolase activity;hydrolase activity, acting on carbon-nitrogen (but not peptide) bonds	GO:0006082;GO:0006519;GO:0006520;GO:0006528;GO:0006530;GO:0006807;GO:0008152;GO:0009056;GO:0009063;GO:0009064;GO:0009065;GO:0009066;GO:0009068;GO:0009308;GO:0009310;GO:0009987;GO:0016054;GO:0019752;GO:0033345;GO:0034641;GO:0042180;GO:0043436;GO:0044106;GO:0044237;GO:0044238;GO:0044248;GO:0044270;GO:0046395	organic acid metabolic process;cellular amino acid and derivative metabolic process;cellular amino acid metabolic process;asparagine metabolic process;asparagine catabolic process;nitrogen compound metabolic process;metabolic process;catabolic process	mmu:66514	ko00910;ko00252;ko00460	Nitrogen metabolism;Alanine and aspartate metabolism;Cyanoamino acid metabolism	K01424	36.017	343
IPI00109221	IPI00109221	Phosphatidylinositide phosphatase SAC1;Suppressor of actin mutations 1-like protein	Sacm1l;Kiaa0851;Sac1	Phosphatidylinositide phosphatase SAC1	3	3	1	-2.19995	0.00353227	-1.86969	-2.91762	-1.38721	-2.53021	33	15	Q9EP69;B0LAE6	SAC1_MOUSE	ENSMUST00000026270		MGI:1933169	NP_109617	PF02383	Syja_N	SacI homology domain	GO:0005789;GO:0016020;GO:0016021;GO:0031090;GO:0031224;GO:0044422;GO:0044424;GO:0044425;GO:0044432;GO:0044444;GO:0044446;GO:0044464	endoplasmic reticulum membrane;membrane;integral to membrane;organelle membrane;intrinsic to membrane;organelle part;intracellular part;membrane part;endoplasmic reticulum part;cytoplasmic part;intracellular organelle part;cell part	GO:0003824;GO:0016787;GO:0016788;GO:0016791;GO:0042578	catalytic activity;hydrolase activity;hydrolase activity, acting on ester bonds;phosphatase activity;phosphoric ester hydrolase activity			mmu:83493				66.943	587
IPI00222284	IPI00222284;IPI00750687	Putative uncharacterized protein	2310005E10Rik	aldo-keto reductase family 1, member B10;33 kDa protein	2	2	2	-2.18684	0.00370754	-1.92826	-2.00148	-2.3722	-2.49885	507	321	Q8BIV6;Q8CI22;Q8R318	Q8BIV6_MOUSE	ENSMUST00000038383	OTTMUSP00000015664;OTTMUSP00000015665	MGI:1915111	NP_765986	PF00248	Aldo_ket_red	Aldo/keto reductase family			GO:0003824;GO:0016491	catalytic activity;oxidoreductase activity	GO:0008152;GO:0055114	metabolic process;oxidation reduction	mmu:67861				35.848	316
IPI00137336	IPI00137336	Glypican-1;Secreted glypican-1	Gpc1	Glypican-1	2	2	1	-2.14453	0.00432757	-2.27305	-2.76415	-2.01602	-1.89849	66	51	Q9QZF2;Q3U379;Q3U3U3;Q8CD04	GPC1_MOUSE	ENSMUST00000045970		MGI:1194891	NP_057905	PF01153	Glypican	Glypican	GO:0005578;GO:0005615;GO:0005886;GO:0016020;GO:0031012;GO:0031224;GO:0031225;GO:0044421;GO:0044425;GO:0044464	proteinaceous extracellular matrix;extracellular space;plasma membrane;membrane;extracellular matrix;intrinsic to membrane;anchored to membrane;extracellular region part;membrane part;cell part	GO:0001948;GO:0005488;GO:0005515;GO:0043394;GO:0043395	glycoprotein binding;binding;protein binding;proteoglycan binding;heparan sulfate proteoglycan binding			mmu:14733			K08107	61.359	557
IPI00923679	IPI00923679;IPI00379844	Insulin receptor substrate 2;4PS	Irs2	Insulin receptor substrate 2;Insulin receptor substrate 2	31	28	30	-2.14275	0.00435561	-1.69235	-2.67168	-1.67225	-2.59315	72	54	B9EJW3;O88970;Q3U2I0;P81122	B9EJW3_MOUSE;IRS2_MOUSE	ENSMUST00000040514		MGI:109334;MGI:109334	NP_001074681	PF02174;PF00169	IRS;PH	PTB domain (IRS-1 type);PH domain	GO:0005829;GO:0044424;GO:0044444;GO:0044464	cytosol;intracellular part;cytoplasmic part;cell part	GO:0004871;GO:0004872;GO:0005102;GO:0005158;GO:0005488;GO:0005515;GO:0019899;GO:0019900;GO:0019901;GO:0019904;GO:0032403;GO:0043548;GO:0060089	signal transducer activity;receptor activity;receptor binding;insulin receptor binding;binding;protein binding;enzyme binding;kinase binding;protein kinase binding;protein domain specific binding;protein complex binding;phosphoinositide 3-kinase binding	GO:0002053;GO:0007154;GO:0007165;GO:0007166;GO:0007167;GO:0007169;GO:0007420;GO:0008284;GO:0008286;GO:0009719;GO:0009725;GO:0009987;GO:0010033;GO:0010464;GO:0030334;GO:0030335;GO:0030879;GO:0032502;GO:0032868;GO:0032869;GO:0032870;GO:0032879;GO:0040012;GO:0042127;GO:0042221;GO:0043434;GO:0048513;GO:0048518;GO:0048522;GO:0048732;GO:0048856;GO:0050789;GO:0050794;GO:0050896;GO:0051270;GO:0051272;GO:…	positive regulation of mesenchymal cell proliferation;cell communication;signal transduction;cell surface receptor linked signal transduction;enzyme linked receptor protein signaling pathway;transmembrane receptor protein tyrosine kinase signaling pathway					136.76	1321
IPI00762858	IPI00762858;IPI00928559;IPI00283611;IPI00468553;IPI00759938;IPI00283612;IPI00928408;IPI00928114;IPI00114342;IPI00127495;IPI00928549;IPI00928405	Putative uncharacterized protein;Hexokinase-1;Hexokinase type I;Hexokinase, tumor isozyme	Hk1	hexokinase 1 isoform HK1;Putative uncharacterized protein;Isoform HK1-SA of Hexokinase-1;Isoform HK1 of Hexokinase-1;Isoform HK1-SC of Hexokinase-1;Isoform HK1-SB of Hexokinase-1	19	19	13	-2.14169	0.00437244	-2.08032	-2.16052	-2.12286	-2.21114	102	66	Q3UE51;Q6GQU1;Q3TTB4;P17710-1;P17710;P17710-3;Q3TJE3;Q3UPC4;P17710-4;P17710-2	Q3UE51_MOUSE;Q3TTB4_MOUSE;HXK1_MOUSE	ENSMUST00000099691;ENSMUST00000116238	OTTMUSP00000046862;OTTMUSP00000046865;OTTMUSP00000046850	MGI:96103;MGI:96103;MGI:96103;MGI:96103;MGI:96103;MGI:96103	NP_001139572;NP_034568	PF00349;PF03727	Hexokinase_1;Hexokinase_2	Hexokinase;Hexokinase	GO:0005739;GO:0005829;GO:0043226;GO:0043227;GO:0043229;GO:0043231;GO:0044424;GO:0044444;GO:0044464;GO:0005741;GO:0016020;GO:0019867;GO:0031090;GO:0031966;GO:0031968;GO:0044422;GO:0044429;GO:0044446	mitochondrion;cytosol;organelle;membrane-bounded organelle;intracellular organelle;intracellular membrane-bounded organelle;intracellular part;cytoplasmic part;cell part;mitochondrial outer membrane;membrane;outer membrane;organelle membrane	GO:0000166;GO:0001882;GO:0001883;GO:0003824;GO:0004396;GO:0005488;GO:0005524;GO:0016301;GO:0016740;GO:0016772;GO:0016773;GO:0017076;GO:0019200;GO:0030554;GO:0032553;GO:0032555;GO:0032559	nucleotide binding;nucleoside binding;purine nucleoside binding;catalytic activity;hexokinase activity;binding;ATP binding;kinase activity;transferase activity;transferase activity, transferring phosphorus-containing groups	GO:0005975;GO:0005996;GO:0006006;GO:0006007;GO:0006066;GO:0006091;GO:0006096;GO:0008152;GO:0009056;GO:0009987;GO:0016052;GO:0019318;GO:0019320;GO:0044237;GO:0044238;GO:0046164;GO:0046365	carbohydrate metabolic process;monosaccharide metabolic process;glucose metabolic process;glucose catabolic process;alcohol metabolic process;generation of precursor metabolites and energy;glycolysis;metabolic process;catabolic process;cellular process	mmu:15275	ko00010;ko00051;ko00052;ko00500;ko00530;ko00521;ko04910;ko04930	Glycolysis / Gluconeogenesis;Fructose and mannose metabolism;Galactose metabolism;Starch and sucrose metabolism;Aminosugars metabolism;Streptomycin biosynthesis;Insulin signaling pathway;Type II diabetes mellitus	K00844	102.3	918
IPI00128256	IPI00128256;IPI00919208	U3 small nucleolar RNA-interacting protein 2;U3 small nucleolar ribonucleoprotein-associated 55 kDa protein;RRP9 homolog	Rrp9;Rnu3ip2;U3-55k	U3 small nucleolar RNA-interacting protein 2	8	6	6	-2.14134	0.004378	-2.32717	-0.925463	-2.26973	-2.01294	234	165	Q91WM3	U3IP2_MOUSE	ENSMUST00000047721	OTTMUSP00000045599	MGI:2384313	NP_663595	PF00400	WD40	WD domain, G-beta repeat	GO:0005730;GO:0030529;GO:0032991;GO:0043226;GO:0043228;GO:0043229;GO:0043232;GO:0044422;GO:0044424;GO:0044428;GO:0044446;GO:0044464	nucleolus;ribonucleoprotein complex;macromolecular complex;organelle;non-membrane-bounded organelle;intracellular organelle;intracellular non-membrane-bounded organelle;organelle part;intracellular part;nuclear part;intracellular organelle part;cell part	GO:0003676;GO:0003723;GO:0005488	nucleic acid binding;RNA binding;binding	GO:0006139;GO:0006364;GO:0006396;GO:0006807;GO:0008152;GO:0009987;GO:0016070;GO:0016072;GO:0034470;GO:0034660;GO:0034960;GO:0043170;GO:0043283;GO:0044237;GO:0044238;GO:0044260	nucleobase, nucleoside, nucleotide and nucleic acid metabolic process;rRNA processing;RNA processing;nitrogen compound metabolic process;metabolic process;cellular process;RNA metabolic process;rRNA metabolic process;ncRNA processing	mmu:27966				52.106	475
IPI00330303	IPI00330303;REV_IPI00463470;REV_IPI00762095	Bifunctional purine biosynthesis protein PURH;Phosphoribosylaminoimidazolecarboxamide formyltransferase;5-aminoimidazole-4-carboxamide ribonucleotide formyltransferase;AICAR transformylase;IMP cyclohydrolase;Inosinicase;IMP synthetase;ATIC	Atic;Purh	Bifunctional purine biosynthesis protein PURH	31	31	29	-2.12993	0.00456224	-2.18593	-2.03066	-2.38218	-2.07393	156	96	Q9CWJ9;B0LAC5	PUR9_MOUSE	ENSMUST00000027384	OTTMUSP00000045654	MGI:1351352	NP_080471;XP_001476934	PF01808;PF02142	AICARFT_IMPCHas;MGS	AICARFT/IMPCHase bienzyme;MGS-like domain			GO:0003824;GO:0003937;GO:0004372;GO:0004643;GO:0008168;GO:0016740;GO:0016741;GO:0016742;GO:0016787;GO:0016810;GO:0016814;GO:0019238	catalytic activity;IMP cyclohydrolase activity;glycine hydroxymethyltransferase activity;phosphoribosylaminoimidazolecarboxamide formyltransferase activity;methyltransferase activity;transferase activity	GO:0006139;GO:0006163;GO:0006164;GO:0006188;GO:0006753;GO:0006807;GO:0008152;GO:0009058;GO:0009117;GO:0009123;GO:0009124;GO:0009126;GO:0009127;GO:0009150;GO:0009152;GO:0009156;GO:0009161;GO:0009165;GO:0009167;GO:0009168;GO:0009259;GO:0009260;GO:0009987;GO:0044237;GO:0044238;GO:0044249;GO:0046040;GO:0046483;GO:0055086	nucleobase, nucleoside, nucleotide and nucleic acid metabolic process;purine nucleotide metabolic process;purine nucleotide biosynthetic process;IMP biosynthetic process;nucleoside phosphate metabolic process;nitrogen compound metabolic process	mmu:100046995;mmu:108147	ko00230;ko00670	Purine metabolism;One carbon pool by folate	K00602	64.217	592
IPI00137612	IPI00137612;IPI00754495	Surfeit locus protein 6;Surfeit gene 6	Surf6;Surf-6;RP23-414L19.2-007	Surfeit locus protein 6;Surfeit gene 6	4	3	3	-2.12706	0.0046096	-2.23954	-1.73271	-2.01459	-2.46969	66	51	P70279;Q3V1X4;A2ALA0	SURF6_MOUSE;A2ALA0_MOUSE	ENSMUST00000047632;ENSMUST00000114043	OTTMUSP00000012334;OTTMUSP00000012498	MGI:98447;MGI:98447	NP_033324	PF04935	SURF6	Surfeit locus protein 6	GO:0001652;GO:0044422;GO:0044424;GO:0044428;GO:0044446;GO:0044451;GO:0044452;GO:0044464;GO:0005730;GO:0043226;GO:0043228;GO:0043229;GO:0043232	granular component;organelle part;intracellular part;nuclear part;intracellular organelle part;nucleoplasm part;nucleolar part;cell part;nucleolus;organelle;non-membrane-bounded organelle;intracellular organelle	GO:0003676;GO:0003677;GO:0003723;GO:0005488	nucleic acid binding;DNA binding;RNA binding;binding	GO:0009987;GO:0010926;GO:0016043;GO:0022607;GO:0022618;GO:0034621;GO:0034622;GO:0042255;GO:0043933;GO:0065003;GO:0022613;GO:0042254;GO:0044085	cellular process;anatomical structure formation;cellular component organization;cellular component assembly;ribonucleoprotein complex assembly;cellular macromolecular complex subunit organization;cellular macromolecular complex assembly;ribosome assembly	mmu:20935				41.234	355
IPI00221694	IPI00221694;IPI00410755	BolA-like protein 2	Bola2	Isoform 1 of BolA-like protein 2;Isoform 2 of BolA-like protein 2	7	7	7	-2.10312	0.00502273	-2.13806	-2.06817	-2.41509	-1.7041	507	321	Q8BGS2-1;Q8BGS2;Q8BGS2-2	BOLA2_MOUSE	ENSMUST00000052145	OTTMUSP00000027079;OTTMUSP00000027080	MGI:1913412;MGI:1913412	NP_780312	PF01722	BolA	BolA-like protein							mmu:66162				10.214	86
IPI00420344	IPI00420344	RRP12-like protein	Rrp12;Kiaa0690	RRP12-like protein	11	11	7	-2.09256	0.00521513	-1.97184	-2.10534	-2.07979	-2.27379	9	9	Q6P5B0;Q3UJA1	RRP12_MOUSE	ENSMUST00000038677		MGI:2147437	NP_955518	PF08161	NUC173	NUC173 domain	GO:0005730;GO:0016020;GO:0016021;GO:0031090;GO:0031224;GO:0031965;GO:0043226;GO:0043228;GO:0043229;GO:0043232;GO:0044422;GO:0044424;GO:0044425;GO:0044428;GO:0044446;GO:0044464	nucleolus;membrane;integral to membrane;organelle membrane;intrinsic to membrane;nuclear membrane;organelle;non-membrane-bounded organelle;intracellular organelle;intracellular non-membrane-bounded organelle;organelle part;intracellular part;membrane part	GO:0005488	binding			mmu:107094				143.13	1295
IPI00108330	IPI00108330;IPI00648948	CB1 cannabinoid receptor-interacting protein 1	Cnrip1	CB1 cannabinoid receptor-interacting protein 1	3	3	3	-2.0875	0.00530967	-2.00242	-2.12133	-2.05367	-2.39798	21	21	Q5M8N0	CNRP1_MOUSE	ENSMUST00000058159	OTTMUSP00000005393	MGI:1917505	NP_084137										mmu:380686				18.612	164
IPI00331251	IPI00331251;IPI00116591;IPI00885762	Short-chain acyl-CoA dehydrogenase;Short-chain specific acyl-CoA dehydrogenase, mitochondrial;Butyryl-CoA dehydrogenase	Acads	Acyl-Coenzyme A dehydrogenase, short chain, isoform CRA_a;Short-chain specific acyl-CoA dehydrogenase, mitochondrial;Protein	8	7	7	-2.08512	0.00535464	-2.11202	-2.87041	-2.05822	-1.43371	99	63	Q6LCR2;Q91W85;Q07417	Q6LCR2_MOUSE;ACADS_MOUSE	ENSMUST00000031524	OTTMUSP00000015526;OTTMUSP00000018323	MGI:87868;MGI:87868	NP_031409	PF00441;PF02770;PF02771	Acyl-CoA_dh_1;Acyl-CoA_dh_M;Acyl-CoA_dh_N	Acyl-CoA dehydrogenase, C-terminal domain;Acyl-CoA dehydrogenase, middle domain;Acyl-CoA dehydrogenase, N-terminal domain	GO:0005739;GO:0043226;GO:0043227;GO:0043229;GO:0043231;GO:0044424;GO:0044444;GO:0044464;GO:0005759;GO:0044422;GO:0044429;GO:0044446	mitochondrion;organelle;membrane-bounded organelle;intracellular organelle;intracellular membrane-bounded organelle;intracellular part;cytoplasmic part;cell part;mitochondrial matrix;organelle part;mitochondrial part;intracellular organelle part	GO:0000062;GO:0000166;GO:0001882;GO:0001883;GO:0003824;GO:0003995;GO:0004085;GO:0005488;GO:0005504;GO:0008289;GO:0009055;GO:0016491;GO:0016627;GO:0017076;GO:0030554;GO:0031406;GO:0033293;GO:0048037;GO:0050660;GO:0050662	acyl-CoA binding;nucleotide binding;nucleoside binding;purine nucleoside binding;catalytic activity;acyl-CoA dehydrogenase activity;butyryl-CoA dehydrogenase activity;binding;fatty acid binding;lipid binding;electron carrier activity	GO:0006950;GO:0008152;GO:0009605;GO:0009719;GO:0009725;GO:0009991;GO:0010033;GO:0031667;GO:0031960;GO:0042221;GO:0042594;GO:0048545;GO:0050896;GO:0051384;GO:0006082;GO:0006629;GO:0006631;GO:0009987;GO:0019752;GO:0032787;GO:0042180;GO:0043436;GO:0044237;GO:0044238;GO:0044255;GO:0055114	response to stress;metabolic process;response to external stimulus;response to endogenous stimulus;response to hormone stimulus;response to extracellular stimulus;response to organic substance;response to nutrient levels	mmu:11409	ko00650;ko00071;ko00280	Butanoate metabolism;Fatty acid metabolism;Valine, leucine and isoleucine degradation	K00248	44.889	412
IPI00230133	IPI00230133	Histone H1.5;H1 VAR.5;H1b	Hist1h1b;H1f5	Histone H1.5	10	10	8	-2.06791	0.0056902	-2.61325	-2.41161	-1.5516	-1.7242	45	36	P43276;Q1WWK3;Q5T003	H15_MOUSE	ENSMUST00000080511	OTTMUSP00000000650	MGI:1861461	NP_064418	PF00538	Linker_histone	linker histone H1 and H5 family	GO:0000786;GO:0005634;GO:0032991;GO:0032993;GO:0043226;GO:0043227;GO:0043229;GO:0043231;GO:0044422;GO:0044424;GO:0044427;GO:0044446;GO:0044464	nucleosome;nucleus;macromolecular complex;protein-DNA complex;organelle;membrane-bounded organelle;intracellular organelle;intracellular membrane-bounded organelle;organelle part;intracellular part;chromosomal part;intracellular organelle part;cell part	GO:0003676;GO:0003677;GO:0005488;GO:0005515	nucleic acid binding;DNA binding;binding;protein binding	GO:0006325;GO:0006334;GO:0006996;GO:0007517;GO:0009987;GO:0010926;GO:0016043;GO:0022607;GO:0032502;GO:0034621;GO:0034622;GO:0034728;GO:0043933;GO:0048513;GO:0048856;GO:0051276;GO:0065003;GO:0065004	chromatin organization;nucleosome assembly;organelle organization;muscle organ development;cellular process;anatomical structure formation;cellular component organization;cellular component assembly;developmental process	mmu:56702			K11275	22.576	223
IPI00342766	IPI00342766;IPI00896020;IPI00649131;IPI00649600;IPI00649004;IPI00649203;IPI00648970;IPI00648700	Heterochromatin protein 1-binding protein 3;Heterochromatin protein 1, binding protein 3	Hp1bp3;RP23-25C1.1-008	Isoform 1 of Heterochromatin protein 1-binding protein 3;Isoform 2 of Heterochromatin protein 1-binding protein 3;Isoform 3 of Heterochromatin protein 1-binding protein 3;Heterochromatin protein 1, binding protein 3	11	9	4	-2.0676	0.00569639	-2.30589	-1.87177	-1.89443	-2.24077	129	90	Q3TEA8-1;Q3TEA8;Q3B7C1;Q3TEA8-2;Q3TEA8-3;A2AM65	HP1B3_MOUSE;A2AM65_MOUSE	ENSMUST00000030541;ENSMUST00000105827	OTTMUSP00000010588;OTTMUSP00000019035;OTTMUSP00000010589;OTTMUSP00000010594	MGI:109369;MGI:109369;MGI:109369;MGI:109369	NP_001116369;NP_034600;NP_001116368	PF00538	Linker_histone	linker histone H1 and H5 family	GO:0000786;GO:0005634;GO:0032991;GO:0032993;GO:0043226;GO:0043227;GO:0043229;GO:0043231;GO:0044422;GO:0044424;GO:0044427;GO:0044446;GO:0044464	nucleosome;nucleus;macromolecular complex;protein-DNA complex;organelle;membrane-bounded organelle;intracellular organelle;intracellular membrane-bounded organelle;organelle part;intracellular part;chromosomal part;intracellular organelle part;cell part	GO:0003676;GO:0003677;GO:0005488	nucleic acid binding;DNA binding;binding	GO:0006325;GO:0006334;GO:0006996;GO:0009987;GO:0010926;GO:0016043;GO:0022607;GO:0034621;GO:0034622;GO:0034728;GO:0043933;GO:0051276;GO:0065003;GO:0065004	chromatin organization;nucleosome assembly;organelle organization;cellular process;anatomical structure formation;cellular component organization;cellular component assembly;cellular macromolecular complex subunit organization	mmu:15441				60.866	554
IPI00230427	IPI00230427;IPI00606310;IPI00122073	Macrophage migration inhibitory factor;Phenylpyruvate tautomerase;L-dopachrome tautomerase;L-dopachrome isomerase;Glycosylation-inhibiting factor;Delayed early response protein 6	Mif	Macrophage migration inhibitory factor;similar to macrophage migration inhibitory factor isoform 1	6	6	4	-2.063	0.00578922	-2.24969	-1.87631	-2.76588	-1.45309	198	132	P34884;Q545F0	MIF_MOUSE	ENSMUST00000038169		MGI:96982	NP_034928;XP_001481125;XP_001481126	PF01187	MIF	Macrophage migration inhibitory factor (MIF)	GO:0005615;GO:0044421	extracellular space;extracellular region part	GO:0003824;GO:0005102;GO:0005125;GO:0005488;GO:0005515;GO:0016853;GO:0016860;GO:0016862;GO:0050178	catalytic activity;receptor binding;cytokine activity;binding;protein binding;isomerase activity;intramolecular oxidoreductase activity;intramolecular oxidoreductase activity, interconverting keto- and enol-groups;phenylpyruvate tautomerase activity	GO:0006950;GO:0006952;GO:0006954;GO:0006974;GO:0007154;GO:0007165;GO:0007242;GO:0007568;GO:0007569;GO:0009605;GO:0009611;GO:0009987;GO:0030330;GO:0032502;GO:0033554;GO:0034984;GO:0042127;GO:0042770;GO:0050789;GO:0050794;GO:0050896;GO:0051716;GO:0065007	response to stress;defense response;inflammatory response;response to DNA damage stimulus;cell communication;signal transduction;intracellular signaling cascade;aging;cell aging;response to external stimulus;response to wounding;cellular process	mmu:17319	ko00350;ko00360	Tyrosine metabolism;Phenylalanine metabolism	K07253	12.504	115
IPI00396728	IPI00396728	ATP-dependent RNA helicase DDX51;DEAD box protein 51	Ddx51	ATP-dependent RNA helicase DDX51	4	3	2	-2.05099	0.00603814	-1.64142	-2.46055	-1.61465	-2.99179	45	18	Q6P9R1;Q6IS54;Q9D6S8	DDX51_MOUSE	ENSMUST00000031478	OTTMUSP00000032272	MGI:1916913	NP_081432	PF00270;PF00271	DEAD;Helicase_C	DEAD/DEAH box helicase;Helicase conserved C-terminal domain	GO:0005730;GO:0043226;GO:0043228;GO:0043229;GO:0043232;GO:0044422;GO:0044424;GO:0044428;GO:0044446;GO:0044464	nucleolus;organelle;non-membrane-bounded organelle;intracellular organelle;intracellular non-membrane-bounded organelle;organelle part;intracellular part;nuclear part;intracellular organelle part;cell part	GO:0000166;GO:0001882;GO:0001883;GO:0003676;GO:0003723;GO:0003824;GO:0004386;GO:0005488;GO:0005524;GO:0008026;GO:0016462;GO:0016787;GO:0016817;GO:0016818;GO:0016887;GO:0017076;GO:0017111;GO:0030554;GO:0032553;GO:0032555;GO:0032559;GO:0042623;GO:0070035	nucleotide binding;nucleoside binding;purine nucleoside binding;nucleic acid binding;RNA binding;catalytic activity;helicase activity;binding;ATP binding;ATP-dependent helicase activity;pyrophosphatase activity;hydrolase activity	GO:0006139;GO:0006364;GO:0006396;GO:0006807;GO:0008152;GO:0009987;GO:0016070;GO:0016072;GO:0034470;GO:0034660;GO:0034960;GO:0043170;GO:0043283;GO:0044237;GO:0044238;GO:0044260	nucleobase, nucleoside, nucleotide and nucleic acid metabolic process;rRNA processing;RNA processing;nitrogen compound metabolic process;metabolic process;cellular process;RNA metabolic process;rRNA metabolic process;ncRNA processing	mmu:69663	ko00790	Folate biosynthesis	K01529	70.367	639
IPI00121190	IPI00121190;IPI00411099	Epidermal growth factor receptor	Egfr	Epidermal growth factor receptor;epidermal growth factor receptor isoform 2	2	2	1	-2.04284	0.00621216	-2.83901	-3.58564	-0.857633	-1.24668	42	42	Q01279;Q3TQS6;Q5SVE8;Q9EP98;Q8VHI0;Q9EQR1;Q9ERV6;Q9WVF5	EGFR_MOUSE;Q8VHI0_MOUSE	ENSMUST00000020329;ENSMUST00000102884	OTTMUSP00000005385;OTTMUSP00000005386	MGI:95294;MGI:95294	NP_997538;NP_031938	PF00757;PF07714;PF01030	Furin-like;Pkinase_Tyr;Recep_L_domain	Furin-like cysteine rich region;Protein tyrosine kinase;Receptor L domain	GO:0016021;GO:0016023;GO:0016323;GO:0030139;GO:0031224;GO:0031410;GO:0031982;GO:0031988;GO:0043226;GO:0043227;GO:0043229;GO:0043231;GO:0044424;GO:0044425;GO:0044444;GO:0044459;GO:0044464;GO:0005634;GO:0005768;GO:0005783	integral to membrane;cytoplasmic membrane-bounded vesicle;basolateral plasma membrane;endocytic vesicle;intrinsic to membrane;cytoplasmic vesicle;vesicle;membrane-bounded vesicle;organelle;membrane-bounded organelle;intracellular organelle	GO:0000166;GO:0001882;GO:0001883;GO:0003824;GO:0004672;GO:0004713;GO:0004714;GO:0004871;GO:0004872;GO:0004888;GO:0005006;GO:0005488;GO:0005515;GO:0005524;GO:0016301;GO:0016740;GO:0016772;GO:0016773;GO:0017076;GO:0019199;GO:0030554;GO:0032553;GO:0032555;GO:0032559;GO:0060089;GO:0003779;GO:0008092;GO:0030234;GO:0030235;GO:0042802;GO:0046982;GO:0046983;GO:0051015	nucleotide binding;nucleoside binding;purine nucleoside binding;catalytic activity;protein kinase activity;protein tyrosine kinase activity;transmembrane receptor protein tyrosine kinase activity;signal transducer activity;receptor activity	GO:0000902;GO:0001932;GO:0006464;GO:0006468;GO:0006793;GO:0006796;GO:0007154;GO:0007165;GO:0007166;GO:0007167;GO:0007169;GO:0007173;GO:0007435;GO:0008152;GO:0008284;GO:0009653;GO:0009987;GO:0016043;GO:0016310;GO:0019220;GO:0019222;GO:0019538;GO:0022612;GO:0031323;GO:0031399;GO:0032268;GO:0032502;GO:0032989;GO:0034960;GO:0042127;GO:0042325;GO:0043170;GO:0043283;GO:0043412;GO:0043687;GO:0044237;GO:…	cell morphogenesis;regulation of protein amino acid phosphorylation;protein modification process;protein amino acid phosphorylation;phosphorus metabolic process;phosphate metabolic process;cell communication;signal transduction	mmu:13649	ko04010;ko04013;ko04012;ko04020;ko04060;ko04810;ko04510;ko04520;ko04540;ko04912;ko04320;ko05200;ko05210;ko05212;ko05214;ko05218;ko05219;ko05215;ko05213;ko05223;ko05120	MAPK signaling pathway;MAPK signaling pathway - fly;ErbB signaling pathway;Calcium signaling pathway;Cytokine-cytokine receptor interaction;Regulation of actin cytoskeleton;Focal adhesion;Adherens junction;Gap junction;GnRH signaling pathway;Dorso-ventral axis formation;Pathways in cancer;Colorectal cancer;Pancreatic cancer;Glioma;Melanoma;Bladder cancer;Prostate cancer;Endometrial cancer;Non-sma…	K04361	134.85	1210
IPI00353796	IPI00353796;IPI00162940	Nucleolar protein 6;Nucleolar RNA-associated protein	Nol6	Isoform 1 of Nucleolar protein 6;Isoform 2 of Nucleolar protein 6	4	4	2	-2.04263	0.0062169	-1.79024	-2.29501	-1.72694	-2.61568	60	48	Q8R5K4-1;Q8R5K4;Q3TB71;Q3TBM4;Q3U5C6;Q8R5K4-2	NOL6_MOUSE	ENSMUST00000030138	OTTMUSP00000007009	MGI:2140151;MGI:2140151	NP_631982	PF03813	Nrap	Nrap protein	GO:0000228;GO:0000793;GO:0000794;GO:0005694;GO:0005730;GO:0005732;GO:0030529;GO:0032991;GO:0043226;GO:0043228;GO:0043229;GO:0043232;GO:0044422;GO:0044424;GO:0044428;GO:0044446;GO:0044464	nuclear chromosome;condensed chromosome;condensed nuclear chromosome;chromosome;nucleolus;small nucleolar ribonucleoprotein complex;ribonucleoprotein complex;macromolecular complex;organelle;non-membrane-bounded organelle;intracellular organelle	GO:0003676;GO:0003723;GO:0005488	nucleic acid binding;RNA binding;binding			mmu:230082				129.23	1152
IPI00420559	IPI00420559;IPI00845786;IPI00653238;IPI00134522	Influenza virus NS1A-binding protein homolog;Kelch family protein Nd1-L;ND1-L2;Nd1-S	Ivns1abp;Kiaa0850;Nd1;Nd1L;Nd1S;Ns1;Ns1bp	Isoform 1 of Influenza virus NS1A-binding protein homolog;Isoform 3 of Influenza virus NS1A-binding protein homolog;Isoform 4 of Influenza virus NS1A-binding protein homolog	7	7	7	-2.04233	0.00622327	-2.38005	-3.0874	-1.59059	-1.70461	6	3	Q920Q8-1;Q920Q8;Q920Q8-3;Q920Q8-4;Q06BK5	NS1BP_MOUSE	ENSMUST00000023918;ENSMUST00000097543;ENSMUST00000111887		MGI:2152389;MGI:2152389;MGI:2152389	NP_473443;NP_001034601	PF07707;PF00651;PF01344	BACK;BTB;Kelch_1	BTB And C-terminal Kelch;BTB/POZ domain;Kelch motif	GO:0005634;GO:0005737;GO:0005856;GO:0043226;GO:0043227;GO:0043228;GO:0043229;GO:0043231;GO:0043232;GO:0044424;GO:0044464	nucleus;cytoplasm;cytoskeleton;organelle;membrane-bounded organelle;non-membrane-bounded organelle;intracellular organelle;intracellular membrane-bounded organelle;intracellular non-membrane-bounded organelle;intracellular part;cell part	GO:0005488;GO:0005515	binding;protein binding			mmu:117198				71.58	642
IPI00752710	IPI00752710;IPI00132439	CCAAT/enhancer-binding protein zeta;CCAAT-box-binding transcription factor	Cebpz;Cbf2;Cebpa-rs1	Isoform CBF1 of CCAAT/enhancer-binding protein zeta;Isoform CBF2 of CCAAT/enhancer-binding protein zeta	5	4	4	-2.03377	0.0064113	-2.28773	-2.04365	-2.02389	-1.77964	99	42	P53569-1;P53569;Q3UGK4;Q3UUZ3;P53569-2	CEBPZ_MOUSE	ENSMUST00000024885		MGI:109386;MGI:109386	NP_001019977	PF03914	CBF	CBF/Mak21 family	GO:0005634;GO:0043226;GO:0043227;GO:0043229;GO:0043231;GO:0044424;GO:0044464	nucleus;organelle;membrane-bounded organelle;intracellular organelle;intracellular membrane-bounded organelle;intracellular part;cell part	GO:0005488	binding	GO:0006139;GO:0006350;GO:0006355;GO:0006807;GO:0008152;GO:0009058;GO:0009059;GO:0009889;GO:0009987;GO:0010468;GO:0010556;GO:0019219;GO:0019222;GO:0031323;GO:0031326;GO:0034645;GO:0034960;GO:0034961;GO:0043170;GO:0043283;GO:0043284;GO:0044237;GO:0044238;GO:0044249;GO:0044260;GO:0045449;GO:0050789;GO:0050794;GO:0051171;GO:0051252;GO:0060255;GO:0065007;GO:0080090	nucleobase, nucleoside, nucleotide and nucleic acid metabolic process;transcription;regulation of transcription, DNA-dependent;nitrogen compound metabolic process;metabolic process;biosynthetic process;macromolecule biosynthetic process	mmu:12607				120.26	1052
IPI00625588	IPI00625588;IPI00274407;IPI00460132	Elongation factor Tu, mitochondrial	Tufm	hypothetical protein;Isoform 1 of Elongation factor Tu, mitochondrial;Isoform 2 of Elongation factor Tu, mitochondrial	19	18	13	-2.02196	0.0066791	-2.00756	-2.32681	-2.03635	-1.71907	24	18	Q8BFR5-1;Q8BFR5;Q8BFR5-2	EFTU_MOUSE	ENSMUST00000098048;ENSMUST00000106392		MGI:1923686;MGI:1923686	XP_001476344;NP_766333;NP_001157185	PF00009;PF03144;PF03143	GTP_EFTU;GTP_EFTU_D2;GTP_EFTU_D3	Elongation factor Tu GTP binding domain;Elongation factor Tu domain 2;Elongation factor Tu C-terminal domain	GO:0005743;GO:0016020;GO:0019866;GO:0031090;GO:0031966;GO:0044422;GO:0044424;GO:0044429;GO:0044444;GO:0044446;GO:0044464	mitochondrial inner membrane;membrane;organelle inner membrane;organelle membrane;mitochondrial membrane;organelle part;intracellular part;mitochondrial part;cytoplasmic part;intracellular organelle part;cell part	GO:0000166;GO:0003676;GO:0003746;GO:0003824;GO:0003924;GO:0005488;GO:0005525;GO:0008135;GO:0016462;GO:0016787;GO:0016817;GO:0016818;GO:0017076;GO:0017111;GO:0019001;GO:0032553;GO:0032555;GO:0032561;GO:0045182	nucleotide binding;nucleic acid binding;translation elongation factor activity;catalytic activity;GTPase activity;binding;GTP binding;translation factor activity, nucleic acid binding;pyrophosphatase activity;hydrolase activity	GO:0006414;GO:0008152;GO:0009058;GO:0009059;GO:0009987;GO:0034645;GO:0034960;GO:0034961;GO:0043170;GO:0043283;GO:0043284;GO:0044237;GO:0044249;GO:0044260	translational elongation;metabolic process;biosynthetic process;macromolecule biosynthetic process;cellular process;cellular macromolecule biosynthetic process;cellular biopolymer metabolic process;cellular biopolymer biosynthetic process	mmu:233870			K02358	49.538	452
IPI00380280	IPI00380280;IPI00830256;IPI00620956;IPI00830155	Carbamoyl-phosphate synthetase 2, aspartate transcarbamylase, and dihydroorotase;Carbamoyl-phosphate synthetase 2, aspartate transcarbamylase, and dihydroorotase, isoform CRA_c;Aspartate transcarbamylase;Cad protein	Cad;mCG_23490	carbamoyl-phosphate synthetase 2, aspartate transcarbamylase, and dihydroorotase;Cad-pending protein;Cad protein	61	53	51	-2.01285	0.00689234	-1.92449	-2.1012	-1.8631	-2.17668	156	141	B2RQC6;B7ZN27;Q6P9L1;O88862;Q80VF8;Q9CWQ9;Q7TN13	B2RQC6_MOUSE;O88862_MOUSE;Q7TN13_MOUSE	ENSMUST00000013773;ENSMUST00000031049;ENSMUST00000114646	OTTMUSP00000025444;OTTMUSP00000025455;OTTMUSP00000025454	MGI:1916969;MGI:1916969;MGI:1916969	NP_076014	PF01979;PF00289;PF02786;PF02787;PF00988;PF00117;PF02142;PF00185;PF02729	Amidohydro_1;CPSase_L_chain;CPSase_L_D2;CPSase_L_D3;CPSase_sm_chain;GATase;MGS;OTCace;OTCace_N	Amidohydrolase family;Carbamoyl-phosphate synthase L chain, N-terminal domain;Carbamoyl-phosphate synthase L chain, ATP binding domain;Carbamoyl-phosphate synthetase large chain, oligomerisation domain;Carbamoyl-phosphate synthase small chain, CPSase domain;Glutamine amidotransferase class-I;MGS-like domain;Aspartate/ornithine carbamoyltransferase, Asp/Orn binding domain;Aspartate/ornithine carba…			GO:0000166;GO:0001882;GO:0001883;GO:0003824;GO:0004070;GO:0004086;GO:0005488;GO:0005524;GO:0016597;GO:0016740;GO:0016741;GO:0016743;GO:0016787;GO:0016810;GO:0016812;GO:0016874;GO:0016879;GO:0017076;GO:0030554;GO:0031406;GO:0032553;GO:0032555;GO:0032559;GO:0043176	nucleotide binding;nucleoside binding;purine nucleoside binding;catalytic activity;aspartate carbamoyltransferase activity;carbamoyl-phosphate synthase activity;binding;ATP binding;amino acid binding;transferase activity	GO:0006082;GO:0006139;GO:0006206;GO:0006207;GO:0006519;GO:0006520;GO:0006541;GO:0006725;GO:0006807;GO:0008152;GO:0009058;GO:0009064;GO:0009112;GO:0009308;GO:0009987;GO:0019752;GO:0019856;GO:0034404;GO:0034641;GO:0034654;GO:0042180;GO:0043436;GO:0044106;GO:0044237;GO:0044238;GO:0044249;GO:0044271;GO:0046112;GO:0046483;GO:0055086	organic acid metabolic process;nucleobase, nucleoside, nucleotide and nucleic acid metabolic process;pyrimidine base metabolic process;'de novo' pyrimidine base biosynthetic process;cellular amino acid and derivative metabolic process	mmu:69719	ko00240;ko00251;ko00252	Pyrimidine metabolism;Glutamate metabolism;Alanine and aspartate metabolism	K11540	243.24	2225
IPI00116221	IPI00116221	Beta-lactamase-like protein 2	Lactb2	Beta-lactamase-like protein 2	4	4	4	-1.99811	0.00724982	-1.84411	-1.75456	-2.43183	-2.15212	30	36	Q99KR3	LACB2_MOUSE	ENSMUST00000027071	OTTMUSP00000024094	MGI:2442551	NP_663356	PF00753	Lactamase_B	Metallo-beta-lactamase superfamily	GO:0005739;GO:0043226;GO:0043227;GO:0043229;GO:0043231;GO:0044424;GO:0044444;GO:0044464	mitochondrion;organelle;membrane-bounded organelle;intracellular organelle;intracellular membrane-bounded organelle;intracellular part;cytoplasmic part;cell part	GO:0003824;GO:0005488;GO:0008270;GO:0016787;GO:0043167;GO:0043169;GO:0046872;GO:0046914	catalytic activity;binding;zinc ion binding;hydrolase activity;ion binding;cation binding;metal ion binding;transition metal ion binding			mmu:212442				32.754	288
IPI00551454	IPI00551454;IPI00475334	Protein RRP5 homolog;Programmed cell death protein 11;Apoptosis-linked gene 4 protein	Pdcd11;Alg4;Kiaa0185	Protein RRP5 homolog;82 kDa protein	10	9	4	-1.97748	0.00777791	-2.01361	-1.87862	-2.13512	-1.94135	36	15	Q6NS46;Q3TUH3	RRP5_MOUSE	ENSMUST00000072141		MGI:1341788	NP_035183	PF00575	S1	S1 RNA binding domain	GO:0005730;GO:0005829;GO:0043226;GO:0043228;GO:0043229;GO:0043232;GO:0044422;GO:0044424;GO:0044428;GO:0044444;GO:0044446;GO:0044464	nucleolus;cytosol;organelle;non-membrane-bounded organelle;intracellular organelle;intracellular non-membrane-bounded organelle;organelle part;intracellular part;nuclear part;cytoplasmic part;intracellular organelle part;cell part	GO:0003676;GO:0003723;GO:0005488	nucleic acid binding;RNA binding;binding	GO:0006139;GO:0006364;GO:0006396;GO:0006807;GO:0008152;GO:0009987;GO:0016070;GO:0016072;GO:0034470;GO:0034660;GO:0034960;GO:0043170;GO:0043283;GO:0044237;GO:0044238;GO:0044260	nucleobase, nucleoside, nucleotide and nucleic acid metabolic process;rRNA processing;RNA processing;nitrogen compound metabolic process;metabolic process;cellular process;RNA metabolic process;rRNA metabolic process;ncRNA processing	mmu:18572				207.78	1862
IPI00129159	IPI00129159;IPI00222053;IPI00222052;IPI00222049;IPI00222057	Neogenin	Neo1;Ngn	Isoform 1 of Neogenin;Isoform 4 of Neogenin;Isoform 3 of Neogenin;Isoform 2 of Neogenin;Isoform 5 of Neogenin	4	4	2	-1.96705	0.00805773	-2.38582	-2.6566	-1.54828	-1.057	63	36	P97798-1;P97798;P97798-4;Q7TQG5;P97798-3;P97798-2;P97798-5	NEO1_MOUSE	ENSMUST00000068664;ENSMUST00000114096;ENSMUST00000114098		MGI:1097159;MGI:1097159;MGI:1097159;MGI:1097159;MGI:1097159	NP_032710;NP_001036217	PF00041;PF07679;PF00047;PF06583	fn3;I-set;ig;Neogenin_C	Fibronectin type III domain;Immunoglobulin I-set domain;Immunoglobulin domain;Neogenin C-terminus	GO:0005886;GO:0016020;GO:0016021;GO:0031224;GO:0044425;GO:0044464	plasma membrane;membrane;integral to membrane;intrinsic to membrane;membrane part;cell part	GO:0004871;GO:0004872;GO:0005488;GO:0005515;GO:0030528;GO:0045296;GO:0050839;GO:0060089	signal transducer activity;receptor activity;binding;protein binding;transcription regulator activity;cadherin binding;cell adhesion molecule binding;molecular transducer activity	GO:0000768;GO:0006944;GO:0006949;GO:0007155;GO:0007520;GO:0009889;GO:0009987;GO:0010468;GO:0010556;GO:0010926;GO:0016043;GO:0016044;GO:0019219;GO:0019222;GO:0022610;GO:0031323;GO:0031326;GO:0032502;GO:0045026;GO:0045449;GO:0048646;GO:0050789;GO:0050794;GO:0051171;GO:0060255;GO:0065007;GO:0080090	syncytium formation by plasma membrane fusion;membrane fusion;syncytium formation;cell adhesion;myoblast fusion;regulation of biosynthetic process;cellular process;regulation of gene expression;regulation of macromolecule biosynthetic process	mmu:18007	ko04514	Cell adhesion molecules (CAMs)	K06766	163.16	1493
IPI00417140	IPI00417140;IPI00262117;IPI00858263;IPI00831336;IPI00625377	Protein arginine N-methyltransferase 3;Heterogeneous nuclear ribonucleoprotein methyltransferase-like protein 3	Prmt3;Hrmt1l3	Isoform 1 of Protein arginine N-methyltransferase 3;Isoform 2 of Protein arginine N-methyltransferase 3	5	3	5	-1.96546	0.00810113	-1.82786	-2.10305	-1.6923	-2.26931	78	45	Q922H1-1;Q922H1;Q922H1-2;Q3U2K1;Q8C1M0	ANM3_MOUSE	ENSMUST00000032715;ENSMUST00000085271	OTTMUSP00000022425	MGI:1919224;MGI:1919224	NP_598501	PF08241	Methyltransf_11	Methyltransferase domain	GO:0005829;GO:0044424;GO:0044444;GO:0044464	cytosol;intracellular part;cytoplasmic part;cell part	GO:0003824;GO:0005488;GO:0005515;GO:0008168;GO:0008270;GO:0016740;GO:0016741;GO:0043167;GO:0043169;GO:0046872;GO:0046914	catalytic activity;binding;protein binding;methyltransferase activity;zinc ion binding;transferase activity;transferase activity, transferring one-carbon groups;ion binding;cation binding;metal ion binding;transition metal ion binding	GO:0006464;GO:0006479;GO:0006730;GO:0008152;GO:0008213;GO:0009987;GO:0019538;GO:0032259;GO:0034960;GO:0043170;GO:0043283;GO:0043412;GO:0043414;GO:0043687;GO:0044237;GO:0044238;GO:0044260;GO:0044267	protein modification process;protein amino acid methylation;one-carbon metabolic process;metabolic process;protein amino acid alkylation;cellular process;protein metabolic process;methylation;cellular biopolymer metabolic process	mmu:71974			K11436	59.902	532
IPI00132960	IPI00132960	Aminoacylase-1;N-acyl-L-amino-acid amidohydrolase;ACY-1	Acy1	Aminoacylase-1	6	5	3	-1.94168	0.0087751	-1.94465	-1.9387	-2.43949	-1.32393	12	9	Q99JW2	ACY1_MOUSE	ENSMUST00000024031		MGI:87913	NP_079647	PF07687;PF01546	M20_dimer;Peptidase_M20	Peptidase dimerisation domain;Peptidase family M20/M25/M40	GO:0005737;GO:0044424;GO:0044464	cytoplasm;intracellular part;cell part	GO:0003824;GO:0004046;GO:0005488;GO:0005515;GO:0008233;GO:0008237;GO:0008270;GO:0016787;GO:0016810;GO:0016811;GO:0043167;GO:0043169;GO:0046872;GO:0046914;GO:0046983;GO:0070011	catalytic activity;aminoacylase activity;binding;protein binding;peptidase activity;metallopeptidase activity;zinc ion binding;hydrolase activity;hydrolase activity, acting on carbon-nitrogen (but not peptide) bonds	GO:0006082;GO:0006508;GO:0006519;GO:0006520;GO:0006807;GO:0008152;GO:0009056;GO:0009057;GO:0009308;GO:0009987;GO:0019538;GO:0019752;GO:0030163;GO:0042180;GO:0043170;GO:0043283;GO:0043285;GO:0043436;GO:0044106;GO:0044237;GO:0044238	organic acid metabolic process;proteolysis;cellular amino acid and derivative metabolic process;cellular amino acid metabolic process;nitrogen compound metabolic process;metabolic process;catabolic process;macromolecule catabolic process	mmu:109652	ko00330	Arginine and proline metabolism	K01436	45.78	408
IPI00338961	IPI00338961;IPI00134843;IPI00648176	GAS2-like protein 1;Growth arrest-specific protein 2-like 1	Gas2l1	Isoform 1 of GAS2-like protein 1;Growth arrest-specific 2 like 1, isoform CRA_b	5	5	4	-1.94096	0.00879601	-2.07323	-1.8087	-2.37965	-1.40758	161	135	Q8JZP9-1;Q8JZP9;Q8JZP9-2;Q9D2H3	GA2L1_MOUSE	ENSMUST00000037146;ENSMUST00000056649;ENSMUST00000109895	OTTMUSP00000005273;OTTMUSP00000005274;OTTMUSP00000005275	MGI:1926176;MGI:1926176	NP_653146;NP_084504	PF00307;PF02187	CH;GAS2	Calponin homology (CH) domain;Growth-Arrest-Specific Protein 2 Domain	GO:0005737;GO:0005856;GO:0043226;GO:0043228;GO:0043229;GO:0043232;GO:0044424;GO:0044464	cytoplasm;cytoskeleton;organelle;non-membrane-bounded organelle;intracellular organelle;intracellular non-membrane-bounded organelle;intracellular part;cell part			GO:0007050;GO:0009987;GO:0022402	cell cycle arrest;cellular process;cell cycle process	mmu:78926				72.41	678
IPI00420950	IPI00420950;IPI00649252;IPI00648982;IPI00172364;IPI00666636;IPI00653624;IPI00914081;IPI00850617;IPI00356154;IPI00655207	Putative uncharacterized protein;Poly A binding protein, cytoplasmic 4;Poly(A) binding protein, cytoplasmic 4	Pabpc4;RP23-138L21.11-004;RP23-138L21.11-003;RP23-138L21.11-002	MCG5546, isoform CRA_c;Poly A binding protein, cytoplasmic 4;Poly A binding protein, cytoplasmic 4;Poly(A) binding protein, cytoplasmic 4;68 kDa protein;Putative uncharacterized protein	8	7	5	-1.93838	0.00887229	-1.93035	-1.94641	-2.04868	-1.69661	33	15	Q3TSA5;Q6PHQ9;Q99LF8;A3KFU8;A3KFU5;Q91YZ8;Q3UX16	Q3TSA5_MOUSE;A3KFU8_MOUSE;A3KFU5_MOUSE;Q91YZ8_MOUSE;Q3UX16_MOUSE	ENSMUST00000080178;ENSMUST00000106241;ENSMUST00000106243;ENSMUST00000078734;ENSMUST00000094192	OTTMUSP00000009342;OTTMUSP00000009345;OTTMUSP00000009344;OTTMUSP00000009343	MGI:2385206;MGI:2385206;MGI:2385206;MGI:2385206;MGI:2385206	NP_570951;NP_683717	PF00658;PF00076	PABP;RRM_1	Poly-adenylate binding protein, unique domain;RNA recognition motif. (a.k.a. RRM, RBD, or RNP domain)			GO:0003676;GO:0003723;GO:0005488;GO:0000166	nucleic acid binding;RNA binding;binding;nucleotide binding			mmu:230721				72.242	660
IPI00121276	IPI00121276;IPI00648884	Trans-2-enoyl-CoA reductase, mitochondrial	Mecr;Nrbf1	Trans-2-enoyl-CoA reductase, mitochondrial	5	4	5	-1.9356	0.00895489	-2.02008	-2.08101	-1.85113	-0.983535	6	12	Q9DCS3;A2A846	MECR_MOUSE	ENSMUST00000030742	OTTMUSP00000009996	MGI:1349441	NP_079573	PF08240;PF00107	ADH_N;ADH_zinc_N	Alcohol dehydrogenase GroES-like domain;Zinc-binding dehydrogenase	GO:0005739;GO:0043226;GO:0043227;GO:0043229;GO:0043231;GO:0044424;GO:0044444;GO:0044464	mitochondrion;organelle;membrane-bounded organelle;intracellular organelle;intracellular membrane-bounded organelle;intracellular part;cytoplasmic part;cell part	GO:0003824;GO:0005488;GO:0008270;GO:0016491;GO:0016627;GO:0016628;GO:0019166;GO:0043167;GO:0043169;GO:0046872;GO:0046914	catalytic activity;binding;zinc ion binding;oxidoreductase activity;oxidoreductase activity, acting on the CH-CH group of donors;oxidoreductase activity, acting on the CH-CH group of donors, NAD or NADP as acceptor	GO:0006082;GO:0006629;GO:0006631;GO:0006633;GO:0008152;GO:0008610;GO:0009058;GO:0009987;GO:0016053;GO:0019752;GO:0032787;GO:0042180;GO:0043436;GO:0044237;GO:0044238;GO:0044249;GO:0044255;GO:0046394;GO:0055114	organic acid metabolic process;lipid metabolic process;fatty acid metabolic process;fatty acid biosynthetic process;metabolic process;lipid biosynthetic process;biosynthetic process;cellular process;organic acid biosynthetic process	mmu:26922	ko00062	Fatty acid elongation in mitochondria	K07512	40.342	373
IPI00228694	IPI00228694;IPI00336485	Synaptotagmin-like protein 5	Sytl5;Slp5	Isoform 1 of Synaptotagmin-like protein 5;Isoform 2 of Synaptotagmin-like protein 5	9	7	6	-1.9356	0.00895489	-2.22289	-1.64832	-1.55961	-2.23978	66	63	Q80T23-1;Q80T23;A2AF58;Q80T23-2	SYTL5_MOUSE	ENSMUST00000067529	OTTMUSP00000019056;OTTMUSP00000019088	MGI:2668451;MGI:2668451	NP_808372	PF00168;PF02318	C2;RPH3A_effector	C2 domain;Rabphilin-3A effector domain	GO:0016020;GO:0044464	membrane;cell part	GO:0005083;GO:0005488;GO:0005515;GO:0008270;GO:0017016;GO:0017137;GO:0019899;GO:0030234;GO:0030695;GO:0031267;GO:0043167;GO:0043169;GO:0046872;GO:0046914;GO:0051020;GO:0060589	small GTPase regulator activity;binding;protein binding;zinc ion binding;Ras GTPase binding;Rab GTPase binding;enzyme binding;enzyme regulator activity;GTPase regulator activity;small GTPase binding;ion binding;cation binding;metal ion binding	GO:0006810;GO:0006886;GO:0006887;GO:0009987;GO:0015031;GO:0016192;GO:0032940;GO:0045184;GO:0046903;GO:0046907;GO:0051234;GO:0051649	transport;intracellular protein transport;exocytosis;cellular process;protein transport;vesicle-mediated transport;secretion by cell;establishment of protein localization;secretion;intracellular transport;establishment of localization	mmu:236643				84.088	753
IPI00323806	IPI00323806;IPI00762051;IPI00880689;IPI00134202;IPI00622333	Putative uncharacterized protein;60S ribosomal protein L24	Rpl24	Putative uncharacterized protein;60S ribosomal protein L24;Putative uncharacterized protein;similar to ribosomal protein L24	10	10	9	-1.92863	0.00916524	-2.32697	-1.81568	-1.90756	-1.94971	60	42	Q3UW40;Q8BP67;Q8BT08;Q9CS31	Q3UW40_MOUSE;RL24_MOUSE;Q8BT08_MOUSE	ENSMUST00000023269;ENSMUST00000114450;ENSMUST00000122365	OTTMUSP00000031508;OTTMUSP00000032535	MGI:1915443;MGI:1915443;MGI:1915443	NP_077180;XP_001001234;XP_001005405	PF01246	Ribosomal_L24e	Ribosomal protein L24e	GO:0005840;GO:0030529;GO:0032991;GO:0043226;GO:0043228;GO:0043229;GO:0043232;GO:0044424;GO:0044444;GO:0044464	ribosome;ribonucleoprotein complex;macromolecular complex;organelle;non-membrane-bounded organelle;intracellular organelle;intracellular non-membrane-bounded organelle;intracellular part;cytoplasmic part;cell part	GO:0003735;GO:0005198;GO:0005488;GO:0005515	structural constituent of ribosome;structural molecule activity;binding;protein binding	GO:0000027;GO:0000075;GO:0006412;GO:0006928;GO:0007093;GO:0007346;GO:0007411;GO:0008152;GO:0009058;GO:0009059;GO:0009987;GO:0010458;GO:0010926;GO:0016043;GO:0019538;GO:0021545;GO:0021554;GO:0021675;GO:0022402;GO:0022607;GO:0022618;GO:0031290;GO:0031575;GO:0032502;GO:0034621;GO:0034622;GO:0034645;GO:0034960;GO:0034961;GO:0042255;GO:0042257;GO:0043170;GO:0043283;GO:0043284;GO:0043933;GO:0044237;GO:…	ribosomal large subunit assembly;cell cycle checkpoint;translation;cell motion;mitotic cell cycle checkpoint;regulation of mitotic cell cycle;axon guidance;metabolic process;biosynthetic process;macromolecule biosynthetic process;cellular process	mmu:68193	ko03010	Ribosome	K02896	18.252	160
IPI00319513	IPI00319513	Tissue-type plasminogen activator;Tissue-type plasminogen activator chain A;Tissue-type plasminogen activator chain B	Plat	Tissue-type plasminogen activator	4	2	3	-1.92703	0.00921421	-1.83548	-1.93239	-1.92168	-2.0448	57	51	P11214	TPA_MOUSE	ENSMUST00000033941		MGI:97610	NP_032898	PF00008;PF00039;PF00051;PF00089	EGF;fn1;Kringle;Trypsin	EGF-like domain;Fibronectin type I domain;Kringle domain;Trypsin	GO:0005615;GO:0016023;GO:0030141;GO:0031410;GO:0031982;GO:0031988;GO:0043226;GO:0043227;GO:0043229;GO:0043231;GO:0044421;GO:0044424;GO:0044444;GO:0044464;GO:0045177	extracellular space;cytoplasmic membrane-bounded vesicle;secretory granule;cytoplasmic vesicle;vesicle;membrane-bounded vesicle;organelle;membrane-bounded organelle;intracellular organelle;intracellular membrane-bounded organelle;extracellular region part	GO:0003824;GO:0004175;GO:0004252;GO:0008233;GO:0008236;GO:0016787;GO:0017171;GO:0070011	catalytic activity;endopeptidase activity;serine-type endopeptidase activity;peptidase activity;serine-type peptidase activity;hydrolase activity;serine hydrolase activity;peptidase activity, acting on L-amino acid peptides	GO:0001666;GO:0006508;GO:0006928;GO:0006950;GO:0007154;GO:0007165;GO:0007166;GO:0007167;GO:0007169;GO:0008152;GO:0009056;GO:0009057;GO:0009987;GO:0014812;GO:0014909;GO:0016477;GO:0019538;GO:0030163;GO:0042221;GO:0043170;GO:0043283;GO:0043285;GO:0044238;GO:0048008;GO:0048870;GO:0050789;GO:0050794;GO:0050896;GO:0065007;GO:0070482	response to hypoxia;proteolysis;cell motion;response to stress;cell communication;signal transduction;cell surface receptor linked signal transduction;enzyme linked receptor protein signaling pathway	mmu:18791	ko04610	Complement and coagulation cascades	K01343	63.096	559
IPI00850851	IPI00850851	Small subunit processome component 20 homolog;Down-regulated in metastasis protein	Utp20;Drim	down-regulated in metastasis	3	2	2	-1.92347	0.00932391	-1.81567	-1.92267	-1.92427	-2.23139	15	3	Q5XG71;Q3ULE2	UTP20_MOUSE	ENSMUST00000004470		MGI:1917933	NP_780367	PF07539	DRIM	Down-regulated in metastasis	GO:0005730;GO:0005732;GO:0030529;GO:0032991;GO:0043226;GO:0043228;GO:0043229;GO:0043232;GO:0044422;GO:0044424;GO:0044428;GO:0044446;GO:0044464	nucleolus;small nucleolar ribonucleoprotein complex;ribonucleoprotein complex;macromolecular complex;organelle;non-membrane-bounded organelle;intracellular organelle;intracellular non-membrane-bounded organelle;organelle part;intracellular part	GO:0005488	binding							317.87	2789
IPI00111218	IPI00111218;IPI00858077	Aldehyde dehydrogenase, mitochondrial;ALDH class 2;AHD-M1;ALDHI;ALDH-E2	Aldh2;Ahd-1;Ahd1	Aldehyde dehydrogenase, mitochondrial	8	8	4	-1.91923	0.00945575	-2.00942	-2.72723	-1.82905	-1.78608	294	138	P47738;Q3TVM2;Q3U6I3;Q3U9J7;Q3UJW1;Q544B1	ALDH2_MOUSE	ENSMUST00000031411	OTTMUSP00000027439	MGI:99600	NP_033786	PF00171	Aldedh	Aldehyde dehydrogenase family	GO:0005759;GO:0044422;GO:0044424;GO:0044429;GO:0044444;GO:0044446;GO:0044464	mitochondrial matrix;organelle part;intracellular part;mitochondrial part;cytoplasmic part;intracellular organelle part;cell part	GO:0003824;GO:0004029;GO:0016491;GO:0016620;GO:0016903	catalytic activity;aldehyde dehydrogenase (NAD) activity;oxidoreductase activity;oxidoreductase activity, acting on the aldehyde or oxo group of donors, NAD or NADP as acceptor;oxidoreductase activity, acting on the aldehyde or oxo group of donors	GO:0008152;GO:0055114	metabolic process;oxidation reduction	mmu:11669	ko00010;ko00053;ko00620;ko00640;ko00650;ko00071;ko00561;ko00280;ko00310;ko00330;ko00340;ko00380;ko00410;ko00903;ko00641;ko00631	Glycolysis / Gluconeogenesis;Ascorbate and aldarate metabolism;Pyruvate metabolism;Propanoate metabolism;Butanoate metabolism;Fatty acid metabolism;Glycerolipid metabolism;Valine, leucine and isoleucine degradation;Lysine degradation;Arginine and proline metabolism;Histidine metabolism;Tryptophan metabolism;beta-Alanine metabolism;Limonene and pinene degradation;3-Chloroacrylic acid degradation;1…	K00128	56.537	519
IPI00830829	IPI00830829;IPI00420593;IPI00882083	Inositol hexakisphosphate and diphosphoinositol-pentakisphosphate kinase 2;InsP6 and PP-IP5 kinase 2;Histidine acid phosphatase domain-containing protein 1	Hisppd1;Kiaa0433;Vip2	140 kDa protein;Isoform 1 of Inositol hexakisphosphate and diphosphoinositol-pentakisphosphate kinase 2	4	4	3	-1.91651	0.00954143	-1.90292	-2.15701	-1.9301	-1.81034	54	15	Q6ZQB6-1;Q6ZQB6;Q80V47;Q8BWK5	VIP2_MOUSE	ENSMUST00000042509;ENSMUST00000112845	OTTMUSP00000024565;OTTMUSP00000024564	MGI:2142810	NP_776121	PF00328	Acid_phosphat_A	Histidine acid phosphatase	GO:0005829;GO:0044424;GO:0044444;GO:0044464	cytosol;intracellular part;cytoplasmic part;cell part	GO:0000166;GO:0000826;GO:0000827;GO:0000828;GO:0000832;GO:0001882;GO:0001883;GO:0003824;GO:0003993;GO:0004428;GO:0005488;GO:0005524;GO:0016301;GO:0016740;GO:0016772;GO:0016776;GO:0016787;GO:0016788;GO:0016791;GO:0017076;GO:0030554;GO:0032553;GO:0032555;GO:0032559;GO:0033857;GO:0042578	nucleotide binding;inositol pyrophosphate synthase activity;inositol 1,3,4,5,6-pentakisphosphate kinase activity;inositol hexakisphosphate kinase activity;inositol hexakisphosphate 5-kinase activity;nucleoside binding;purine nucleoside binding	GO:0006020;GO:0006066;GO:0008152;GO:0019751	inositol metabolic process;alcohol metabolic process;metabolic process;polyol metabolic process	mmu:227399				140.37	1242
IPI00281011	IPI00281011	MARCKS-related protein;MARCKS-like protein 1;Macrophage myristoylated alanine-rich C kinase substrate;Brain protein F52	Marcksl1;Mlp;Mrp	MARCKS-related protein	8	5	7	-1.91581	0.0095636	-1.46525	-2.74557	-1.12491	-2.36636	66	36	P28667;B2KGE6	MRP_MOUSE	ENSMUST00000062356	OTTMUSP00000010174;OTTMUSP00000042918	MGI:97143	NP_034937	PF02063	MARCKS	MARCKS family	GO:0005886;GO:0016020;GO:0044464	plasma membrane;membrane;cell part	GO:0005488;GO:0005515;GO:0005516	binding;protein binding;calmodulin binding	GO:0008284;GO:0042127;GO:0048518;GO:0048522;GO:0050789;GO:0050794;GO:0065007	positive regulation of cell proliferation;regulation of cell proliferation;positive regulation of biological process;positive regulation of cellular process;regulation of biological process;regulation of cellular process;biological regulation	mmu:17357				20.165	200
IPI00762553	IPI00762553;IPI00874946;IPI00874675;IPI00230690;IPI00230689;IPI00230692;IPI00284272;IPI00460717;IPI00131432;IPI00277410;IPI00759934	Bullous pemphigoid antigen 1, isoforms 1/2/3/4;Hemidesmosomal plaque protein;Dystonia musculorum protein	Dst;Bpag1	dystonin isoform b;830 kDa protein;829 kDa protein;Isoform 2 of Bullous pemphigoid antigen 1, isoforms 1/2/3/4;Isoform 1 of Bullous pemphigoid antigen 1, isoforms 1/2/3/4;Isoform 4 of Bullous pemphigoid antigen 1, isoforms 1/2/3/4;Isoform 3 of Bullous pemp	27	25	19	-1.91466	0.0096	-1.80515	-2.02417	-1.59931	-2.10758	102	66	Q91ZU6-1;Q91ZU6;Q91ZU6-2;A3KMF5;Q80VL5;Q91ZU6-4;Q91ZU6-3	BPA1_MOUSE	ENSMUST00000097785;ENSMUST00000097786		MGI:104627;MGI:104627;MGI:104627;MGI:104627	NP_604443;NP_598594	PF00307;PF00036;PF02187;PF00681;PF00435	CH;efhand;GAS2;Plectin;Spectrin	Calponin homology (CH) domain;EF hand;Growth-Arrest-Specific Protein 2 Domain;Plectin repeat;Spectrin repeat	GO:0005737;GO:0005856;GO:0015629;GO:0015630;GO:0030054;GO:0030055;GO:0030056;GO:0043226;GO:0043228;GO:0043229;GO:0043232;GO:0044424;GO:0044425;GO:0044459;GO:0044464;GO:0045111;GO:0060053	cytoplasm;cytoskeleton;actin cytoskeleton;microtubule cytoskeleton;cell junction;cell-substrate junction;hemidesmosome;organelle;non-membrane-bounded organelle;intracellular organelle;intracellular non-membrane-bounded organelle;intracellular part	GO:0003779;GO:0005488;GO:0005509;GO:0005515;GO:0008017;GO:0008092;GO:0015631;GO:0043167;GO:0043169;GO:0046872	actin binding;binding;calcium ion binding;protein binding;microtubule binding;cytoskeletal protein binding;tubulin binding;ion binding;cation binding;metal ion binding	GO:0000226;GO:0006810;GO:0006996;GO:0007010;GO:0007017;GO:0007018;GO:0007050;GO:0007155;GO:0007409;GO:0008088;GO:0008090;GO:0009653;GO:0009987;GO:0010970;GO:0016043;GO:0022402;GO:0022610;GO:0030030;GO:0030705;GO:0031110;GO:0031122;GO:0032502;GO:0032886;GO:0032989;GO:0032990;GO:0033043;GO:0045103;GO:0045104;GO:0046907;GO:0048812;GO:0048858;GO:0048869;GO:0050789;GO:0050794;GO:0051128;GO:0051234;GO:…	microtubule cytoskeleton organization;transport;organelle organization;cytoskeleton organization;microtubule-based process;microtubule-based movement;cell cycle arrest;cell adhesion;axonogenesis;axon cargo transport;retrograde axon cargo transport					834.21	7393
IPI00471226	IPI00471226	Activator of basal transcription 1	Abt1	Activator of basal transcription 1	3	1	3	-1.91231	0.00967471	-1.7932	-1.53084	-2.03143	-2.18156	507	459	Q9QYL7	ABT1_MOUSE	ENSMUST00000041782	OTTMUSP00000000657	MGI:1353636	NP_038952				GO:0005667;GO:0005730;GO:0032991;GO:0043226;GO:0043228;GO:0043229;GO:0043232;GO:0043234;GO:0044422;GO:0044424;GO:0044428;GO:0044446;GO:0044451;GO:0044464	transcription factor complex;nucleolus;macromolecular complex;organelle;non-membrane-bounded organelle;intracellular organelle;intracellular non-membrane-bounded organelle;protein complex;organelle part;intracellular part;nuclear part	GO:0003676;GO:0003677;GO:0003702;GO:0003723;GO:0005488;GO:0016251;GO:0030528	nucleic acid binding;DNA binding;RNA polymerase II transcription factor activity;RNA binding;binding;general RNA polymerase II transcription factor activity;transcription regulator activity	GO:0006139;GO:0006350;GO:0006351;GO:0006355;GO:0006366;GO:0006807;GO:0008152;GO:0009058;GO:0009059;GO:0009889;GO:0009987;GO:0010468;GO:0010556;GO:0016070;GO:0019219;GO:0019222;GO:0031323;GO:0031326;GO:0032774;GO:0034645;GO:0034960;GO:0034961;GO:0043170;GO:0043283;GO:0043284;GO:0044237;GO:0044238;GO:0044249;GO:0044260;GO:0045449;GO:0050789;GO:0050794;GO:0051171;GO:0051252;GO:0060255;GO:0065007;GO:…	nucleobase, nucleoside, nucleotide and nucleic acid metabolic process;transcription;transcription, DNA-dependent;regulation of transcription, DNA-dependent;transcription from RNA polymerase II promoter;nitrogen compound metabolic process;metabolic process	mmu:30946				30.658	269
IPI00279462	IPI00279462	p53 and DNA damage-regulated protein 1	Pdrg1;Pdrg	p53 and DNA damage-regulated protein 1	2	2	1	-1.91008	0.00974651	-2.12411	-1.72235	-1.98322	-1.83693	66	36	P59048;Q3UKN2	PDRG1_MOUSE	ENSMUST00000028972	OTTMUSP00000016804	MGI:1915809	NP_849270	PF01920	Prefoldin_2	Prefoldin subunit	GO:0016272;GO:0032991;GO:0043234;GO:0044424;GO:0044444;GO:0044445;GO:0044464	prefoldin complex;macromolecular complex;protein complex;intracellular part;cytoplasmic part;cytosolic part;cell part	GO:0005488;GO:0005515;GO:0051082	binding;protein binding;unfolded protein binding	GO:0006457;GO:0008152;GO:0009987;GO:0019538;GO:0034960;GO:0043170;GO:0043283;GO:0044237;GO:0044238;GO:0044260;GO:0044267	protein folding;metabolic process;cellular process;protein metabolic process;cellular biopolymer metabolic process;macromolecule metabolic process;biopolymer metabolic process;cellular metabolic process;primary metabolic process	mmu:68559				15.382	133
IPI00129622	IPI00129622	Synaptotagmin-2;Synaptotagmin II	Syt2	Synaptotagmin-2	2	2	2	-1.90929	0.00977198	-1.7696	-1.90761	-1.91096	-1.98377	27	24	P46097;Q5DTI3;Q9JM87;Q9JM88;Q9JM89	SYT2_MOUSE	ENSMUST00000027721;ENSMUST00000121990	OTTMUSP00000037731	MGI:99666	NP_033333	PF00168	C2	C2 domain	GO:0000267;GO:0005624;GO:0005626;GO:0012506;GO:0016020;GO:0016021;GO:0030054;GO:0030659;GO:0030662;GO:0030665;GO:0030667;GO:0030672;GO:0031090;GO:0031224;GO:0042584;GO:0042598;GO:0044422;GO:0044424;GO:0044425;GO:0044433;GO:0044444;GO:0044446;GO:0044459;GO:0044464	cell fraction;membrane fraction;insoluble fraction;vesicle membrane;membrane;integral to membrane;cell junction;cytoplasmic vesicle membrane;coated vesicle membrane;clathrin coated vesicle membrane;secretory granule membrane;synaptic vesicle membrane	GO:0005215;GO:0005488;GO:0005509;GO:0005515;GO:0005543;GO:0005544;GO:0008289;GO:0043167;GO:0043169;GO:0046872	transporter activity;binding;calcium ion binding;protein binding;phospholipid binding;calcium-dependent phospholipid binding;lipid binding;ion binding;cation binding;metal ion binding	GO:0006810;GO:0051234	transport;establishment of localization	mmu:20980				47.262	422
IPI00137601	IPI00137601	Coiled-coil domain-containing protein 44	Ccdc44	Translational activator of cytochrome c oxidase 1	3	3	2	-1.89878	0.0101159	-1.76851	-2.02905	-2.26168	-0.730295	66	51	Q8K0Z7	CCD44_MOUSE	ENSMUST00000002048	OTTMUSP00000002981	MGI:1917457	NP_081622	PF01709	DUF28	Domain of unknown function DUF28	GO:0005739;GO:0043226;GO:0043227;GO:0043229;GO:0043231;GO:0044424;GO:0044444;GO:0044464	mitochondrion;organelle;membrane-bounded organelle;intracellular organelle;intracellular membrane-bounded organelle;intracellular part;cytoplasmic part;cell part					mmu:70207				32.314	294
IPI00132957	IPI00132957;IPI00648745	Probable ATP-dependent RNA helicase DDX56;DEAD box protein 56;ATP-dependent 61 kDa nucleolar RNA helicase;DEAD (Asp-Glu-Ala-Asp) box polypeptide 56	Ddx56;D11Ertd619e;Noh61;RP23-198N14.5-002	Probable ATP-dependent RNA helicase DDX56;DEAD (Asp-Glu-Ala-Asp) box polypeptide 56	8	7	7	-1.89517	0.0102365	-1.87997	-1.72274	-1.95908	-1.91037	12	9	Q9D0R4;Q5SVX3;Q8BK66;Q5SVX2	DDX56_MOUSE;Q5SVX2_MOUSE	ENSMUST00000004507	OTTMUSP00000000726;OTTMUSP00000000727	MGI:1277172;MGI:1277172	NP_080814	PF00270;PF00271	DEAD;Helicase_C	DEAD/DEAH box helicase;Helicase conserved C-terminal domain	GO:0005730;GO:0043226;GO:0043228;GO:0043229;GO:0043232;GO:0044422;GO:0044424;GO:0044428;GO:0044446;GO:0044464	nucleolus;organelle;non-membrane-bounded organelle;intracellular organelle;intracellular non-membrane-bounded organelle;organelle part;intracellular part;nuclear part;intracellular organelle part;cell part	GO:0000166;GO:0001882;GO:0001883;GO:0003676;GO:0003723;GO:0003824;GO:0004386;GO:0005488;GO:0005524;GO:0008026;GO:0016462;GO:0016787;GO:0016817;GO:0016818;GO:0016887;GO:0017076;GO:0017111;GO:0030554;GO:0032553;GO:0032555;GO:0032559;GO:0042623;GO:0070035;GO:0005515	nucleotide binding;nucleoside binding;purine nucleoside binding;nucleic acid binding;RNA binding;catalytic activity;helicase activity;binding;ATP binding;ATP-dependent helicase activity;pyrophosphatase activity;hydrolase activity	GO:0006139;GO:0006364;GO:0006396;GO:0006807;GO:0008152;GO:0009987;GO:0016070;GO:0016072;GO:0034470;GO:0034660;GO:0034960;GO:0043170;GO:0043283;GO:0044237;GO:0044238;GO:0044260	nucleobase, nucleoside, nucleotide and nucleic acid metabolic process;rRNA processing;RNA processing;nitrogen compound metabolic process;metabolic process;cellular process;RNA metabolic process;rRNA metabolic process;ncRNA processing	mmu:52513	ko00790	Folate biosynthesis	K01529	61.211	546
IPI00115827	IPI00115827;IPI00651782	Protein NipSnap homolog 2;Glioblastoma-amplified sequence;Putative uncharacterized protein	Gbas;Nipsnap2	Protein NipSnap homolog 2;glioblastoma amplified	2	1	2	-1.89309	0.0103065	-1.66005	-2.07686	-1.80245	-1.98373	30	15	O55126;Q3TD78;Q7TMG8	NIPS2_MOUSE;Q3TD78_MOUSE	ENSMUST00000086046	OTTMUSP00000034566;OTTMUSP00000034567	MGI:1278343;MGI:1278343	NP_032121	PF07978	NIPSNAP	NIPSNAP	GO:0005739;GO:0043226;GO:0043227;GO:0043229;GO:0043231;GO:0044424;GO:0044444;GO:0044464	mitochondrion;organelle;membrane-bounded organelle;intracellular organelle;intracellular membrane-bounded organelle;intracellular part;cytoplasmic part;cell part					mmu:14467				32.932	281
IPI00420546	IPI00420546;IPI00875206;IPI00875360	Pre-rRNA-processing protein TSR1 homolog	Tsr1;Kiaa1401	Isoform 1 of Pre-rRNA-processing protein TSR1 homolog;Isoform 2 of Pre-rRNA-processing protein TSR1 homolog	5	5	3	-1.8849	0.0105865	-1.76555	-1.90651	-1.86329	-2.03879	6	3	Q5SWD9-1;Q5SWD9;Q5SWD9-2	TSR1_MOUSE	ENSMUST00000045807	OTTMUSP00000006478	MGI:2144566;MGI:2144566	NP_796299	PF08142;PF04950	AARP2CN;DUF663	AARP2CN (NUC121) domain;Protein of unknown function (DUF663)	GO:0005730;GO:0043226;GO:0043228;GO:0043229;GO:0043232;GO:0044422;GO:0044424;GO:0044428;GO:0044446;GO:0044464	nucleolus;organelle;non-membrane-bounded organelle;intracellular organelle;intracellular non-membrane-bounded organelle;organelle part;intracellular part;nuclear part;intracellular organelle part;cell part			GO:0009987;GO:0010926;GO:0016043;GO:0022607;GO:0022618;GO:0034621;GO:0034622;GO:0042255;GO:0043933;GO:0065003	cellular process;anatomical structure formation;cellular component organization;cellular component assembly;ribonucleoprotein complex assembly;cellular macromolecular complex subunit organization;cellular macromolecular complex assembly;ribosome assembly	mmu:104662				92.104	803
IPI00347394	IPI00347394;IPI00880722;IPI00923637	Protein KIAA0664	Kiaa0664	hypothetical protein LOC74148;Isoform 3 of Protein KIAA0664;Isoform 2 of Protein KIAA0664	11	10	9	-1.87965	0.0107693	-1.78076	-2.04462	-1.97853	-1.55208	129	90	Q5SW19-1;Q5SW19;Q5SW19-3;Q3TRU2;Q6P7U7;Q5SW19-2	K0664_MOUSE	ENSMUST00000092915	OTTMUSP00000006467;OTTMUSP00000037386	MGI:1921398;MGI:1921398;MGI:1921398	NP_001074627						GO:0005488	binding			mmu:74148			K03255	151.83	1353
IPI00467266	IPI00467266;IPI00187434	Deoxyuridine triphosphatase;Putative uncharacterized protein;Deoxyuridine triphosphatase, isoform CRA_a;Dutp protein;Deoxyuridine triphosphatase, isoform CRA_b	Dut;RP23-216B20.3-002;mCG_6136;Dutp;RP23-216B20.3-001	deoxyuridine triphosphatase isoform 2;deoxyuridine triphosphatase isoform 1	10	10	9	-1.87963	0.01077	-1.92064	-1.83863	-2.181	-1.5756	191	129	Q9CQ43;Q8VCG1;Q9JJ44	Q9CQ43_MOUSE;Q8VCG1_MOUSE	ENSMUST00000051605;ENSMUST00000082122	OTTMUSP00000016348;OTTMUSP00000016347	MGI:1346051;MGI:1346051	NP_076084;NP_001153118	PF00692	dUTPase	dUTPase	GO:0005739;GO:0043226;GO:0043227;GO:0043229;GO:0043231;GO:0044424;GO:0044444;GO:0044464	mitochondrion;organelle;membrane-bounded organelle;intracellular organelle;intracellular membrane-bounded organelle;intracellular part;cytoplasmic part;cell part	GO:0003824;GO:0004170;GO:0016462;GO:0016787;GO:0016817;GO:0016818;GO:0047429	catalytic activity;dUTP diphosphatase activity;pyrophosphatase activity;hydrolase activity;hydrolase activity, acting on acid anhydrides;hydrolase activity, acting on acid anhydrides, in phosphorus-containing anhydrides	GO:0005975;GO:0005996;GO:0006014;GO:0006066;GO:0006139;GO:0006213;GO:0006220;GO:0006753;GO:0006807;GO:0008152;GO:0009116;GO:0009117;GO:0009120;GO:0009141;GO:0009147;GO:0009200;GO:0009211;GO:0009219;GO:0009262;GO:0009394;GO:0009987;GO:0019321;GO:0019692;GO:0044237;GO:0044238;GO:0046080;GO:0046125;GO:0046483;GO:0055086	carbohydrate metabolic process;monosaccharide metabolic process;D-ribose metabolic process;alcohol metabolic process;nucleobase, nucleoside, nucleotide and nucleic acid metabolic process;pyrimidine nucleoside metabolic process	mmu:110074	ko00240	Pyrimidine metabolism	K01520	17.384	162
IPI00274656	IPI00274656	Mitochondrial-processing peptidase subunit beta;Beta-MPP;P-52	Pmpcb	Mitochondrial-processing peptidase subunit beta	8	7	6	-1.87722	0.0108548	-1.67769	-2.18955	-1.28906	-2.07675	183	117	Q9CXT8;Q3TET5	MPPB_MOUSE	ENSMUST00000030882	OTTMUSP00000031162	MGI:1920328	NP_082707	PF00675;PF05193	Peptidase_M16;Peptidase_M16_C	Insulinase (Peptidase family M16);Peptidase M16 inactive domain	GO:0005743;GO:0005759;GO:0016020;GO:0019866;GO:0031090;GO:0031966;GO:0044422;GO:0044424;GO:0044429;GO:0044444;GO:0044446;GO:0044464	mitochondrial inner membrane;mitochondrial matrix;membrane;organelle inner membrane;organelle membrane;mitochondrial membrane;organelle part;intracellular part;mitochondrial part;cytoplasmic part;intracellular organelle part;cell part	GO:0003824;GO:0004175;GO:0004222;GO:0005488;GO:0008233;GO:0008237;GO:0008270;GO:0016787;GO:0043167;GO:0043169;GO:0046872;GO:0046914;GO:0070011	catalytic activity;endopeptidase activity;metalloendopeptidase activity;binding;peptidase activity;metallopeptidase activity;zinc ion binding;hydrolase activity;ion binding;cation binding;metal ion binding;transition metal ion binding	GO:0006508;GO:0008152;GO:0009056;GO:0009057;GO:0019538;GO:0030163;GO:0043170;GO:0043283;GO:0043285;GO:0044238	proteolysis;metabolic process;catabolic process;macromolecule catabolic process;protein metabolic process;protein catabolic process;macromolecule metabolic process;biopolymer metabolic process;biopolymer catabolic process;primary metabolic process	mmu:73078			K01412	54.614	489
IPI00136703	IPI00136703;IPI00127596	Creatine kinase B-type;Creatine kinase B chain;B-CK	Ckb;Ckbb	Creatine kinase B-type	20	19	15	-1.86027	0.0114685	-1.95692	-1.76361	-2.21013	-1.26182	60	30	Q04447	KCRB_MOUSE	ENSMUST00000001304		MGI:88407	NP_067248	PF00217;PF02807	ATP-gua_Ptrans;ATP-gua_PtransN	ATP:guanido phosphotransferase, C-terminal catalytic domain;ATP:guanido phosphotransferase, N-terminal domain	GO:0005739;GO:0043226;GO:0043227;GO:0043229;GO:0043231;GO:0044424;GO:0044444;GO:0044464	mitochondrion;organelle;membrane-bounded organelle;intracellular organelle;intracellular membrane-bounded organelle;intracellular part;cytoplasmic part;cell part	GO:0000166;GO:0001882;GO:0001883;GO:0003824;GO:0004111;GO:0005488;GO:0005524;GO:0016301;GO:0016740;GO:0016772;GO:0016775;GO:0017076;GO:0030554;GO:0032553;GO:0032555;GO:0032559	nucleotide binding;nucleoside binding;purine nucleoside binding;catalytic activity;creatine kinase activity;binding;ATP binding;kinase activity;transferase activity;transferase activity, transferring phosphorus-containing groups			mmu:12709	ko00330	Arginine and proline metabolism	K00933	42.713	381
IPI00648235	IPI00648235;IPI00187512	Cytosolic 5'-nucleotidase 3;Cytosolic 5'-nucleotidase III;Pyrimidine 5'-nucleotidase 1;Lupin	Nt5c3	Isoform 1 of Cytosolic 5'-nucleotidase 3;Isoform 2 of Cytosolic 5'-nucleotidase 3	9	9	6	-1.8601	0.0114748	-1.85323	-1.87877	-1.86697	-1.66089	102	69	Q9D020-1;Q9D020;Q9D020-3	5NT3_MOUSE	ENSMUST00000031793;ENSMUST00000116607	OTTMUSP00000026958;OTTMUSP00000026957	MGI:1927186;MGI:1927186	NP_080280	PF05822	UMPH-1	Pyrimidine 5'-nucleotidase (UMPH-1)	GO:0005783;GO:0043226;GO:0043227;GO:0043229;GO:0043231;GO:0044424;GO:0044444;GO:0044464	endoplasmic reticulum;organelle;membrane-bounded organelle;intracellular organelle;intracellular membrane-bounded organelle;intracellular part;cytoplasmic part;cell part	GO:0000166;GO:0000287;GO:0003824;GO:0005488;GO:0008252;GO:0008253;GO:0016740;GO:0016787;GO:0016788;GO:0016791;GO:0042578;GO:0043167;GO:0043169;GO:0046872	nucleotide binding;magnesium ion binding;catalytic activity;binding;nucleotidase activity;5'-nucleotidase activity;transferase activity;hydrolase activity;hydrolase activity, acting on ester bonds;phosphatase activity;phosphoric ester hydrolase activity	GO:0006139;GO:0006753;GO:0006807;GO:0008152;GO:0009117;GO:0009987;GO:0044237;GO:0044238;GO:0055086	nucleobase, nucleoside, nucleotide and nucleic acid metabolic process;nucleoside phosphate metabolic process;nitrogen compound metabolic process;metabolic process;nucleotide metabolic process;cellular process;cellular metabolic process	mmu:107569	ko00230;ko00240;ko00760	Purine metabolism;Pyrimidine metabolism;Nicotinate and nicotinamide metabolism	K01081	33.79	297
IPI00331601	IPI00331601	Cirhin;Testis-expressed gene 292 protein	Cirh1a;Kiaa1988;Tex292	Cirhin	2	1	1	-1.85976	0.0114872	-1.60566	-3.66788	-1.96836	-1.75117	42	24	Q8R2N2;Q3UJY3	CIR1A_MOUSE	ENSMUST00000047629		MGI:1096573	NP_035704	PF00400	WD40	WD domain, G-beta repeat	GO:0005730;GO:0043226;GO:0043228;GO:0043229;GO:0043232;GO:0044422;GO:0044424;GO:0044428;GO:0044446;GO:0044464	nucleolus;organelle;non-membrane-bounded organelle;intracellular organelle;intracellular non-membrane-bounded organelle;organelle part;intracellular part;nuclear part;intracellular organelle part;cell part					mmu:21771				76.908	686
IPI00318935	IPI00318935;IPI00462115;IPI00919281	SRA stem-loop-interacting RNA-binding protein, mitochondrial	Slirp	Isoform 1 of SRA stem-loop-interacting RNA-binding protein, mitochondrial;Isoform 2 of SRA stem-loop-interacting RNA-binding protein, mitochondrial	4	4	2	-1.85751	0.0115712	-1.79517	-2.2268	-1.91985	-1.10745	57	51	Q9D8T7-1;Q9D8T7;Q14AR0;Q9D8T7-2	SLIRP_MOUSE	ENSMUST00000077462	OTTMUSP00000045013;OTTMUSP00000045014	MGI:1916394;MGI:1916394	NP_081234	PF00076	RRM_1	RNA recognition motif. (a.k.a. RRM, RBD, or RNP domain)	GO:0005634;GO:0005739;GO:0043226;GO:0043227;GO:0043229;GO:0043231;GO:0044424;GO:0044444;GO:0044464	nucleus;mitochondrion;organelle;membrane-bounded organelle;intracellular organelle;intracellular membrane-bounded organelle;intracellular part;cytoplasmic part;cell part	GO:0000166;GO:0003676;GO:0003723;GO:0005488	nucleotide binding;nucleic acid binding;RNA binding;binding	GO:0006139;GO:0006350;GO:0006355;GO:0006807;GO:0008152;GO:0009058;GO:0009059;GO:0009889;GO:0009987;GO:0010468;GO:0010556;GO:0019219;GO:0019222;GO:0031323;GO:0031326;GO:0034645;GO:0034960;GO:0034961;GO:0043170;GO:0043283;GO:0043284;GO:0044237;GO:0044238;GO:0044249;GO:0044260;GO:0045449;GO:0050789;GO:0050794;GO:0051171;GO:0051252;GO:0060255;GO:0065007;GO:0080090	nucleobase, nucleoside, nucleotide and nucleic acid metabolic process;transcription;regulation of transcription, DNA-dependent;nitrogen compound metabolic process;metabolic process;biosynthetic process;macromolecule biosynthetic process	mmu:380773				12.605	112
IPI00224127	IPI00224127;IPI00760075	Uncharacterized protein C9orf114 homolog	D2Wsu81e	Isoform 1 of Uncharacterized protein C9orf114 homolog;Isoform 2 of Uncharacterized protein C9orf114 homolog	5	4	2	-1.85651	0.0116087	-1.5738	-1.44677	-2.13921	-2.33747	12	6	Q3UHX9-1;Q3UHX9;A2AQY6;Q3UHX9-2;Q66L45	CI114_MOUSE	ENSMUST00000044268;ENSMUST00000100220	OTTMUSP00000018156	MGI:106544;MGI:106544	NP_001160094;NP_766248	PF02598	DUF171	Uncharacterized ACR, COG2106							mmu:227695			K09142	42.957	385
IPI00271726	IPI00271726	39S ribosomal protein L28, mitochondrial;MRP-L28	Mrpl28	39S ribosomal protein L28, mitochondrial	3	3	2	-1.85446	0.0116854	-1.7151	-3.28739	-1.36661	-1.99382	45	39	Q9D1B9	RM28_MOUSE	ENSMUST00000025014	OTTMUSP00000032670	MGI:1915861	NP_077189				GO:0005739;GO:0005840;GO:0030529;GO:0032991;GO:0043226;GO:0043227;GO:0043228;GO:0043229;GO:0043231;GO:0043232;GO:0044424;GO:0044444;GO:0044464	mitochondrion;ribosome;ribonucleoprotein complex;macromolecular complex;organelle;membrane-bounded organelle;non-membrane-bounded organelle;intracellular organelle;intracellular membrane-bounded organelle;intracellular non-membrane-bounded organelle	GO:0003676;GO:0003677;GO:0003700;GO:0005488;GO:0030528	nucleic acid binding;DNA binding;transcription factor activity;binding;transcription regulator activity	GO:0009889;GO:0010468;GO:0010556;GO:0019219;GO:0019222;GO:0031323;GO:0031326;GO:0045449;GO:0050789;GO:0050794;GO:0051171;GO:0060255;GO:0065007;GO:0080090	regulation of biosynthetic process;regulation of gene expression;regulation of macromolecule biosynthetic process;regulation of nucleobase, nucleoside, nucleotide and nucleic acid metabolic process;regulation of metabolic process	mmu:68611				30.169	257
IPI00761408	IPI00761408;IPI00319518	Lon protease homolog, mitochondrial;Lon protease-like protein;Mitochondrial ATP-dependent protease Lon;Serine protease 15;Lon protease homolog	Lonp1;Prss15	Lon protease homolog, mitochondrial;Lon protease homolog	23	17	21	-1.85313	0.0117357	-1.77113	-2.31688	-1.68015	-1.93513	30	27	Q8CGK3;Q56A16;Q3V2D0	LONM_MOUSE;Q3V2D0_MOUSE	ENSMUST00000047226;ENSMUST00000097301		MGI:1921392;MGI:1921392	NP_083058	PF00004;PF02190;PF05362	AAA;LON;Lon_C	ATPase family associated with various cellular activities (AAA);ATP-dependent protease La (LON) domain;Lon protease (S16) C-terminal proteolytic domain	GO:0005759;GO:0044422;GO:0044424;GO:0044429;GO:0044444;GO:0044446;GO:0044464;GO:0005739;GO:0043226;GO:0043227;GO:0043229;GO:0043231	mitochondrial matrix;organelle part;intracellular part;mitochondrial part;cytoplasmic part;intracellular organelle part;cell part;mitochondrion;organelle;membrane-bounded organelle;intracellular organelle;intracellular membrane-bounded organelle	GO:0000166;GO:0001882;GO:0001883;GO:0003676;GO:0003677;GO:0003697;GO:0003824;GO:0004175;GO:0004176;GO:0004252;GO:0005488;GO:0005524;GO:0008233;GO:0008236;GO:0010843;GO:0016462;GO:0016787;GO:0016817;GO:0016818;GO:0016887;GO:0017076;GO:0017111;GO:0017171;GO:0030554;GO:0032553;GO:0032555;GO:0032559;GO:0042623;GO:0043565;GO:0043566;GO:0070011;GO:0070361	nucleotide binding;nucleoside binding;purine nucleoside binding;nucleic acid binding;DNA binding;single-stranded DNA binding;catalytic activity;endopeptidase activity;ATP-dependent peptidase activity;serine-type endopeptidase activity;binding;ATP binding	GO:0006139;GO:0006163;GO:0006195;GO:0006200;GO:0006508;GO:0006753;GO:0006807;GO:0008152;GO:0009056;GO:0009057;GO:0009117;GO:0009141;GO:0009143;GO:0009144;GO:0009146;GO:0009150;GO:0009154;GO:0009166;GO:0009199;GO:0009203;GO:0009205;GO:0009207;GO:0009259;GO:0009261;GO:0009987;GO:0019538;GO:0030163;GO:0043170;GO:0043283;GO:0043285;GO:0044237;GO:0044238;GO:0044248;GO:0046034;GO:0046483;GO:0046700;GO:…	nucleobase, nucleoside, nucleotide and nucleic acid metabolic process;purine nucleotide metabolic process;purine nucleotide catabolic process;ATP catabolic process;proteolysis;nucleoside phosphate metabolic process;nitrogen compound metabolic process	mmu:74142			K08675	105.84	949
IPI00114285	IPI00114285;IPI00459308;IPI00880872	Glutathione S-transferase omega-1;GSTO 1-1;p28	Gsto1;Gstx;Gtsttl	Glutathione S-transferase omega-1	12	11	11	-1.85143	0.0118002	-1.94025	-1.76261	-2.15599	-1.42427	15	24	O09131	GSTO1_MOUSE	ENSMUST00000026050	OTTMUSP00000035646	MGI:1342273	NP_034492	PF00043;PF02798	GST_C;GST_N	Glutathione S-transferase, C-terminal domain;Glutathione S-transferase, N-terminal domain	GO:0005737;GO:0044424;GO:0044464	cytoplasm;intracellular part;cell part	GO:0003824;GO:0004364;GO:0016740;GO:0016765	catalytic activity;glutathione transferase activity;transferase activity;transferase activity, transferring alkyl or aryl (other than methyl) groups			mmu:14873	ko00480;ko00980;ko00982	Glutathione metabolism;Metabolism of xenobiotics by cytochrome P450;Drug metabolism - cytochrome P450	K00799	27.497	240
IPI00321718	IPI00321718;IPI00651865;IPI00880977;IPI00880826	Prohibitin-2;B-cell receptor-associated protein BAP37;Repressor of estrogen receptor activity;Putative uncharacterized protein	Phb2;Bap;Bcap37;Rea	Prohibitin-2;Putative uncharacterized protein;Protein	22	18	17	-1.84919	0.0118857	-1.83453	-1.87768	-1.86385	-1.6446	9	12	O35129;Q3V235;Q3V2V2	PHB2_MOUSE;Q3V2V2_MOUSE	ENSMUST00000004375;ENSMUST00000100958	OTTMUSP00000022607;OTTMUSP00000033817	MGI:102520;MGI:102520	NP_031557	PF01145	Band_7	SPFH domain / Band 7 family	GO:0005634;GO:0005743;GO:0016020;GO:0019866;GO:0031090;GO:0031966;GO:0043226;GO:0043227;GO:0043229;GO:0043231;GO:0044422;GO:0044424;GO:0044429;GO:0044444;GO:0044446;GO:0044464;GO:0005739	nucleus;mitochondrial inner membrane;membrane;organelle inner membrane;organelle membrane;mitochondrial membrane;organelle;membrane-bounded organelle;intracellular organelle;intracellular membrane-bounded organelle;organelle part;intracellular part	GO:0004871;GO:0004872;GO:0005488;GO:0005515;GO:0016564;GO:0016566;GO:0030528;GO:0060089	signal transducer activity;receptor activity;binding;protein binding;transcription repressor activity;specific transcriptional repressor activity;transcription regulator activity;molecular transducer activity	GO:0006139;GO:0006350;GO:0006355;GO:0006807;GO:0007154;GO:0007165;GO:0008152;GO:0009058;GO:0009059;GO:0009889;GO:0009987;GO:0010468;GO:0010556;GO:0019219;GO:0019222;GO:0031323;GO:0031326;GO:0034645;GO:0034960;GO:0034961;GO:0043170;GO:0043283;GO:0043284;GO:0044237;GO:0044238;GO:0044249;GO:0044260;GO:0045449;GO:0050789;GO:0050794;GO:0051171;GO:0051252;GO:0060255;GO:0065007;GO:0080090	nucleobase, nucleoside, nucleotide and nucleic acid metabolic process;transcription;regulation of transcription, DNA-dependent;nitrogen compound metabolic process;cell communication;signal transduction;metabolic process;biosynthetic process	mmu:12034				33.296	299
IPI00230283	IPI00230283;IPI00881994	Elongation factor G 1, mitochondrial	Gfm1;Efg;Efg1;Gfm	Elongation factor G, mitochondrial;63 kDa protein	6	6	4	-1.84563	0.0120225	-1.75889	-2.46924	-1.93237	-1.69799	9	6	Q8K0D5	EFG1_MOUSE	ENSMUST00000077271	OTTMUSP00000037052;OTTMUSP00000037053	MGI:107339	NP_613057	PF00679;PF03764;PF00009;PF03144	EFG_C;EFG_IV;GTP_EFTU;GTP_EFTU_D2	Elongation factor G C-terminus;Elongation factor G, domain IV;Elongation factor Tu GTP binding domain;Elongation factor Tu domain 2	GO:0005739;GO:0043226;GO:0043227;GO:0043229;GO:0043231;GO:0044424;GO:0044444;GO:0044464	mitochondrion;organelle;membrane-bounded organelle;intracellular organelle;intracellular membrane-bounded organelle;intracellular part;cytoplasmic part;cell part	GO:0000166;GO:0003676;GO:0003746;GO:0003824;GO:0003924;GO:0005488;GO:0005525;GO:0008135;GO:0016462;GO:0016787;GO:0016817;GO:0016818;GO:0017076;GO:0017111;GO:0019001;GO:0032553;GO:0032555;GO:0032561;GO:0045182	nucleotide binding;nucleic acid binding;translation elongation factor activity;catalytic activity;GTPase activity;binding;GTP binding;translation factor activity, nucleic acid binding;pyrophosphatase activity;hydrolase activity	GO:0006414;GO:0008152;GO:0009058;GO:0009059;GO:0009987;GO:0034645;GO:0034960;GO:0034961;GO:0043170;GO:0043283;GO:0043284;GO:0044237;GO:0044249;GO:0044260	translational elongation;metabolic process;biosynthetic process;macromolecule biosynthetic process;cellular process;cellular macromolecule biosynthetic process;cellular biopolymer metabolic process;cellular biopolymer biosynthetic process	mmu:28030			K02355	83.549	751
IPI00124828	IPI00124828	28S ribosomal protein S31, mitochondrial;MRP-S31;Imogen 38	Mrps31;Imogn38	28S ribosomal protein S31, mitochondrial	2	1	1	-1.8453	0.012035	-1.89552	-1.95294	-1.79509	-1.36324	3	6	Q61733	RT31_MOUSE	ENSMUST00000033934		MGI:1913153	NP_065585				GO:0005739;GO:0005840;GO:0030529;GO:0032991;GO:0043226;GO:0043227;GO:0043228;GO:0043229;GO:0043231;GO:0043232;GO:0044424;GO:0044444;GO:0044464	mitochondrion;ribosome;ribonucleoprotein complex;macromolecular complex;organelle;membrane-bounded organelle;non-membrane-bounded organelle;intracellular organelle;intracellular membrane-bounded organelle;intracellular non-membrane-bounded organelle					mmu:57312				43.88	384
IPI00320462	IPI00320462;IPI00623838	Valacyclovir hydrolase;Biphenyl hydrolase-like protein	Bphl	Putative uncharacterized protein;17 kDa protein	4	2	3	-1.8419	0.0121673	-1.66462	-2.25965	-0.754802	-2.01917	30	21	Q8R164;Q3TDN8	BPHL_MOUSE	ENSMUST00000040656		MGI:1915271	NP_080788	PF00561	Abhydrolase_1	alpha/beta hydrolase fold	GO:0005739;GO:0043226;GO:0043227;GO:0043229;GO:0043231;GO:0044424;GO:0044444;GO:0044464	mitochondrion;organelle;membrane-bounded organelle;intracellular organelle;intracellular membrane-bounded organelle;intracellular part;cytoplasmic part;cell part	GO:0003824;GO:0016787	catalytic activity;hydrolase activity			mmu:68021			K01175	33.705	299
IPI00115824	IPI00115824;IPI00515151	Protein NipSnap homolog 1;Putative uncharacterized protein	Nipsnap1	Protein NipSnap homolog 1;Putative uncharacterized protein	3	3	3	-1.84129	0.0121909	-2.11971	-1.76228	-1.13875	-1.92031	30	15	O55125;Q5SVF7;Q3UGS1	NIPS1_MOUSE;Q3UGS1_MOUSE	ENSMUST00000038570;ENSMUST00000093370	OTTMUSP00000005277	MGI:1278344;MGI:1278344	NP_032724	PF07978	NIPSNAP	NIPSNAP	GO:0005743;GO:0016020;GO:0019866;GO:0031090;GO:0031966;GO:0044422;GO:0044424;GO:0044429;GO:0044444;GO:0044446;GO:0044464	mitochondrial inner membrane;membrane;organelle inner membrane;organelle membrane;mitochondrial membrane;organelle part;intracellular part;mitochondrial part;cytoplasmic part;intracellular organelle part;cell part					mmu:18082				33.363	284
IPI00120199	IPI00120199;IPI00750433	Mitochondrial-processing peptidase subunit alpha;Alpha-MPP;P-55;Peptidase (Mitochondrial processing) alpha;Peptidase (Mitochondrial processing) alpha, isoform CRA_a	Pmpca;Inpp5e;RP23-306D20.8-002;mCG_18769	Mitochondrial-processing peptidase subunit alpha;Peptidase (Mitochondrial processing) alpha, isoform CRA_a	4	3	3	-1.84079	0.0122106	-1.81373	-2.36145	-1.19215	-1.86785	80	48	Q9DC61;A2AIW8;Q3TTM6;Q3TY06;Q3UDE0;Q8BK51;A2AIW9	MPPA_MOUSE;A2AIW9_MOUSE	ENSMUST00000076431;ENSMUST00000114093	OTTMUSP00000013720;OTTMUSP00000013721	MGI:1918568;MGI:1918568	NP_775272	PF00675;PF05193	Peptidase_M16;Peptidase_M16_C	Insulinase (Peptidase family M16);Peptidase M16 inactive domain	GO:0005759;GO:0044422;GO:0044424;GO:0044429;GO:0044444;GO:0044446;GO:0044464	mitochondrial matrix;organelle part;intracellular part;mitochondrial part;cytoplasmic part;intracellular organelle part;cell part	GO:0003824;GO:0004175;GO:0004222;GO:0005488;GO:0008233;GO:0008237;GO:0008270;GO:0016787;GO:0043167;GO:0043169;GO:0046872;GO:0046914;GO:0070011	catalytic activity;endopeptidase activity;metalloendopeptidase activity;binding;peptidase activity;metallopeptidase activity;zinc ion binding;hydrolase activity;ion binding;cation binding;metal ion binding;transition metal ion binding	GO:0006508;GO:0008152;GO:0009056;GO:0009057;GO:0019538;GO:0030163;GO:0043170;GO:0043283;GO:0043285;GO:0044238	proteolysis;metabolic process;catabolic process;macromolecule catabolic process;protein metabolic process;protein catabolic process;macromolecule metabolic process;biopolymer metabolic process;biopolymer catabolic process;primary metabolic process	mmu:66865			K01412	58.278	524
IPI00133284	IPI00133284;IPI00853761	ES1 protein homolog, mitochondrial	D10Jhu81e	ES1 protein homolog, mitochondrial;hypothetical protein isoform 2	5	5	5	-1.83899	0.0122811	-1.94232	-1.90857	-1.76941	-1.50675	27	27	Q9D172	ES1_MOUSE	ENSMUST00000001242		MGI:1351861	NP_613067;XP_001474527;XP_001474543	PF01965	DJ-1_PfpI	DJ-1/PfpI family	GO:0005739;GO:0005814;GO:0043226;GO:0043227;GO:0043228;GO:0043229;GO:0043231;GO:0043232;GO:0044422;GO:0044424;GO:0044430;GO:0044444;GO:0044446;GO:0044450;GO:0044464	mitochondrion;centriole;organelle;membrane-bounded organelle;non-membrane-bounded organelle;intracellular organelle;intracellular membrane-bounded organelle;intracellular non-membrane-bounded organelle;organelle part;intracellular part;cytoskeletal part					mmu:100046684;mmu:28295				28.09	266
IPI00225618	IPI00225618;IPI00133376;IPI00466650;IPI00930864;IPI00930876;IPI00930777	Calcium/calmodulin-dependent 3',5'-cyclic nucleotide phosphodiesterase 1C;Putative uncharacterized protein	Pde1c	Isoform 3 of Calcium/calmodulin-dependent 3',5'-cyclic nucleotide phosphodiesterase 1C;Isoform 1 of Calcium/calmodulin-dependent 3',5'-cyclic nucleotide phosphodiesterase 1C;Isoform 2 of Calcium/calmodulin-dependent 3',5'-cyclic nucleotide phosphodiesteras	11	10	7	-1.83009	0.0126357	-1.85507	-2.2953	-1.80511	-1.78256	6	3	Q64338-3;Q64338;Q64338-1;Q64338-2;Q5D0E7;Q3USZ6;Q9D5W0;Q8CDV2	PDE1C_MOUSE;Q3USZ6_MOUSE;Q9D5W0_MOUSE;Q8CDV2_MOUSE	ENSMUST00000044505;ENSMUST00000101372;ENSMUST00000114327		MGI:108413;MGI:108413;MGI:108413;MGI:108413;MGI:108413;MGI:108413	NP_001153425;NP_001153427;NP_035184;NP_001020739;NP_001153432;NP_001153424;NP_001153428;NP_001153429	PF00233;PF08499	PDEase_I;PDEase_I_N	3'5'-cyclic nucleotide phosphodiesterase;3'5'-cyclic nucleotide phosphodiesterase N-terminal			GO:0005488;GO:0005515;GO:0005516;GO:0003824;GO:0004112;GO:0004114;GO:0008081;GO:0016787;GO:0016788;GO:0042578	binding;protein binding;calmodulin binding;catalytic activity;cyclic-nucleotide phosphodiesterase activity;3',5'-cyclic-nucleotide phosphodiesterase activity;phosphoric diester hydrolase activity;hydrolase activity	GO:0007154;GO:0007165;GO:0009987;GO:0050789;GO:0050794;GO:0065007	cell communication;signal transduction;cellular process;regulation of biological process;regulation of cellular process;biological regulation	mmu:18575	ko00230;ko04914	Purine metabolism;Progesterone-mediated oocyte maturation	K01120	80.289	706
IPI00121378	IPI00121378	CD166 antigen;Activated leukocyte cell adhesion molecule;Protein DM-GRASP	Alcam	CD166 antigen	5	5	5	-1.81573	0.0132261	-1.70407	-2.10339	-1.71839	-1.91308	38	33	Q61490;Q3TTY3;Q54AJ5;Q5MPX5	CD166_MOUSE	ENSMUST00000023312		MGI:1313266	NP_033785	PF08205;PF00047;PF07686	C2-set_2;ig;V-set	CD80-like C2-set immunoglobulin domain;Immunoglobulin domain;Immunoglobulin V-set domain	GO:0009897;GO:0016021;GO:0030424;GO:0031224;GO:0042995;GO:0043005;GO:0043025;GO:0044425;GO:0044459;GO:0044464	external side of plasma membrane;integral to membrane;axon;intrinsic to membrane;cell projection;neuron projection;cell soma;membrane part;plasma membrane part;cell part	GO:0005488;GO:0005515	binding;protein binding	GO:0006928;GO:0007155;GO:0007411;GO:0008045;GO:0009987;GO:0022610	cell motion;cell adhesion;axon guidance;motor axon guidance;cellular process;biological adhesion	mmu:11658	ko04514	Cell adhesion molecules (CAMs)	K06547	65.091	583
IPI00222538	IPI00222538;IPI00894878	28S ribosomal protein S35, mitochondrial;MRP-S35	Mrps35	28S ribosomal protein S35, mitochondrial;mitochondrial ribosomal protein S35 precursor	3	2	1	-1.81265	0.0133559	-1.82474	-3.01984	-1.80056	-1.4488	507	321	Q8BJZ4	RT35_MOUSE	ENSMUST00000036111	OTTMUSP00000042636;OTTMUSP00000028123	MGI:2385255	NP_663548	PF10213	MRP-S28	Mitochondrial ribosomal subunit protein	GO:0000314;GO:0005763;GO:0015935;GO:0030529;GO:0032991;GO:0033279;GO:0044422;GO:0044424;GO:0044429;GO:0044444;GO:0044446;GO:0044464	organellar small ribosomal subunit;mitochondrial small ribosomal subunit;small ribosomal subunit;ribonucleoprotein complex;macromolecular complex;ribosomal subunit;organelle part;intracellular part;mitochondrial part;cytoplasmic part					mmu:232536				35.975	320
IPI00122038	IPI00122038;IPI00230236	Probable ATP-dependent RNA helicase DDX27;DEAD box protein 27	Ddx27	Isoform 1 of Probable ATP-dependent RNA helicase DDX27;MCG14602, isoform CRA_c	9	9	6	-1.81196	0.013385	-1.85359	-1.58243	-1.77034	-2.01414	162	102	Q921N6-1;Q921N6;Q921N6-2;Q3UUG2	DDX27_MOUSE	ENSMUST00000018143	OTTMUSP00000001092	MGI:2385884;MGI:2385884	NP_694705	PF00270;PF00271	DEAD;Helicase_C	DEAD/DEAH box helicase;Helicase conserved C-terminal domain	GO:0005634;GO:0043226;GO:0043227;GO:0043229;GO:0043231;GO:0044424;GO:0044464	nucleus;organelle;membrane-bounded organelle;intracellular organelle;intracellular membrane-bounded organelle;intracellular part;cell part	GO:0000166;GO:0001882;GO:0001883;GO:0003676;GO:0003824;GO:0004386;GO:0005488;GO:0005524;GO:0008026;GO:0016462;GO:0016787;GO:0016817;GO:0016818;GO:0016887;GO:0017076;GO:0017111;GO:0030554;GO:0032553;GO:0032555;GO:0032559;GO:0042623;GO:0070035	nucleotide binding;nucleoside binding;purine nucleoside binding;nucleic acid binding;catalytic activity;helicase activity;binding;ATP binding;ATP-dependent helicase activity;pyrophosphatase activity;hydrolase activity			mmu:228889				85.91	760
IPI00130535	IPI00130535;IPI00890234	Lipoamide acyltransferase component of branched-chain alpha-keto acid dehydrogenase complex, mitochondrial;Dihydrolipoyllysine-residue (2-methylpropanoyl)transferase;Dihydrolipoamide branched chain transacylase;BCKAD E2 subunit;Putative uncharacterized protein;Dihydrolipoamide branched chain transacylase E2	Dbt;mCG_2010	Lipoamide acyltransferase component of branched-chain alpha-keto acid dehydrogenase complex, mitochondrial;dihydrolipoamide branched chain transacylase E2	4	3	3	-1.80971	0.0134808	-1.88697	-2.28195	-1.67992	-1.73245	591	598	P53395;Q3TMF5;Q6LC11;Q7TND9	ODB2_MOUSE;Q3TMF5_MOUSE	ENSMUST00000000349	OTTMUSP00000033637	MGI:105386;MGI:105386	NP_034152	PF00198;PF00364;PF02817	2-oxoacid_dh;Biotin_lipoyl;E3_binding	2-oxoacid dehydrogenases acyltransferase (catalytic domain);Biotin-requiring enzyme;e3 binding domain	GO:0005759;GO:0044422;GO:0044424;GO:0044429;GO:0044444;GO:0044446;GO:0044464;GO:0005739;GO:0043226;GO:0043227;GO:0043229;GO:0043231	mitochondrial matrix;organelle part;intracellular part;mitochondrial part;cytoplasmic part;intracellular organelle part;cell part;mitochondrion;organelle;membrane-bounded organelle;intracellular organelle;intracellular membrane-bounded organelle	GO:0003824;GO:0005488;GO:0005515;GO:0008415;GO:0016740;GO:0016746;GO:0016747;GO:0031405;GO:0031406;GO:0043754;GO:0048037;GO:0050662	catalytic activity;binding;protein binding;acyltransferase activity;transferase activity;transferase activity, transferring acyl groups;transferase activity, transferring acyl groups other than amino-acyl groups;lipoic acid binding;carboxylic acid binding	GO:0006082;GO:0006629;GO:0006631;GO:0006633;GO:0006637;GO:0006732;GO:0008152;GO:0008610;GO:0009058;GO:0009108;GO:0009987;GO:0016053;GO:0019752;GO:0032787;GO:0042180;GO:0043436;GO:0044237;GO:0044238;GO:0044249;GO:0044255;GO:0046394;GO:0046949;GO:0051186;GO:0051188	organic acid metabolic process;lipid metabolic process;fatty acid metabolic process;fatty acid biosynthetic process;acyl-CoA metabolic process;coenzyme metabolic process;metabolic process;lipid biosynthetic process;biosynthetic process	mmu:13171	ko00280	Valine, leucine and isoleucine degradation	K09699	53.16	482
IPI00125513	IPI00125513	Mitochondrial import inner membrane translocase subunit Tim9	Timm9;Tim9;Tim9a;Timm9a	Mitochondrial import inner membrane translocase subunit Tim9	5	5	5	-1.80686	0.0136027	-1.8805	-1.73323	-2.01126	-1.51815	12	6	Q9WV98	TIM9_MOUSE	ENSMUST00000021486		MGI:1353436	NP_001020024;NP_001020025;NP_038924	PF02953	zf-Tim10_DDP	Tim10/DDP family zinc finger	GO:0005743;GO:0016020;GO:0019866;GO:0031090;GO:0031966;GO:0032991;GO:0042719;GO:0043234;GO:0044422;GO:0044424;GO:0044429;GO:0044444;GO:0044446;GO:0044464	mitochondrial inner membrane;membrane;organelle inner membrane;organelle membrane;mitochondrial membrane;macromolecular complex;mitochondrial intermembrane space protein transporter complex;protein complex;organelle part;intracellular part	GO:0005488;GO:0005515;GO:0008270;GO:0043167;GO:0043169;GO:0046872;GO:0046914	binding;protein binding;zinc ion binding;ion binding;cation binding;metal ion binding;transition metal ion binding	GO:0006605;GO:0006612;GO:0006626;GO:0006810;GO:0006839;GO:0006886;GO:0006996;GO:0007005;GO:0007006;GO:0007007;GO:0009987;GO:0015031;GO:0016043;GO:0016044;GO:0017038;GO:0045039;GO:0045184;GO:0046907;GO:0051234;GO:0051649;GO:0055085;GO:0065002	protein targeting;protein targeting to membrane;protein targeting to mitochondrion;transport;mitochondrial transport;intracellular protein transport;organelle organization;mitochondrion organization;mitochondrial membrane organization	mmu:30056				10.344	89
IPI00130018	IPI00130018;IPI00400117;IPI00831119;IPI00831019	Acyl-protein thioesterase 1;Lysophospholipase 1;Lysophospholipase I	Lypla1;Apt1;Pla1a	Isoform 1 of Acyl-protein thioesterase 1;Isoform 2 of Acyl-protein thioesterase 1;21 kDa protein	5	5	4	-1.80126	0.0138455	-1.79877	-1.74986	-1.95637	-1.80375	21	15	P97823-1;P97823;Q4FK51;P97823-2	LYPA1_MOUSE	ENSMUST00000027036	OTTMUSP00000024030;OTTMUSP00000024031;OTTMUSP00000024033	MGI:1344588;MGI:1344588	NP_032892	PF02230	Abhydrolase_2	Phospholipase/Carboxylesterase	GO:0005739;GO:0043226;GO:0043227;GO:0043229;GO:0043231;GO:0044424;GO:0044444;GO:0044464	mitochondrion;organelle;membrane-bounded organelle;intracellular organelle;intracellular membrane-bounded organelle;intracellular part;cytoplasmic part;cell part	GO:0003824;GO:0016787	catalytic activity;hydrolase activity	GO:0006082;GO:0006629;GO:0006631;GO:0008152;GO:0009987;GO:0019752;GO:0032787;GO:0042180;GO:0043436;GO:0044237;GO:0044238;GO:0044255	organic acid metabolic process;lipid metabolic process;fatty acid metabolic process;metabolic process;cellular process;carboxylic acid metabolic process;monocarboxylic acid metabolic process;cellular ketone metabolic process;oxoacid metabolic process	mmu:18777	ko00564	Glycerophospholipid metabolism	K06128	24.687	230
IPI00127050	IPI00127050;IPI00881534;IPI00408727;IPI00881568	Inorganic pyrophosphatase 2, mitochondrial	Ppa2	Isoform 1 of Inorganic pyrophosphatase 2, mitochondrial;38 kDa protein;Isoform 2 of Inorganic pyrophosphatase 2, mitochondrial;17 kDa protein	2	2	2	-1.79115	0.0142926	-2.08756	-1.81831	-1.76399	-1.66001	27	15	Q91VM9-1;Q91VM9;Q91VM9-2	IPYR2_MOUSE	ENSMUST00000029644;ENSMUST00000106315	OTTMUSP00000037971;OTTMUSP00000037972;OTTMUSP00000037973;OTTMUSP00000037975	MGI:1922026;MGI:1922026	NP_666253	PF00719	Pyrophosphatase	Inorganic pyrophosphatase	GO:0005739;GO:0043226;GO:0043227;GO:0043229;GO:0043231;GO:0044424;GO:0044444;GO:0044464	mitochondrion;organelle;membrane-bounded organelle;intracellular organelle;intracellular membrane-bounded organelle;intracellular part;cytoplasmic part;cell part	GO:0000287;GO:0003824;GO:0004427;GO:0005488;GO:0016462;GO:0016787;GO:0016817;GO:0016818;GO:0043167;GO:0043169;GO:0046872	magnesium ion binding;catalytic activity;inorganic diphosphatase activity;binding;pyrophosphatase activity;hydrolase activity;hydrolase activity, acting on acid anhydrides;hydrolase activity, acting on acid anhydrides, in phosphorus-containing anhydrides	GO:0006793;GO:0006796;GO:0008152;GO:0009987;GO:0044237	phosphorus metabolic process;phosphate metabolic process;metabolic process;cellular process;cellular metabolic process	mmu:74776	ko00190	Oxidative phosphorylation	K01507	38.114	330
IPI00387389	IPI00387389	39S ribosomal protein L18, mitochondrial	Mrpl18	39S ribosomal protein L18, mitochondrial	2	1	2	-1.78856	0.0144092	-1.91853	-1.65859	-3.06303	-1.0573	15	9	Q9CQL5;Q8BTQ6	RM18_MOUSE	ENSMUST00000079121	OTTMUSP00000035352	MGI:1914931	NP_080586				GO:0005739;GO:0005840;GO:0030529;GO:0032991;GO:0043226;GO:0043227;GO:0043228;GO:0043229;GO:0043231;GO:0043232;GO:0044424;GO:0044444;GO:0044464	mitochondrion;ribosome;ribonucleoprotein complex;macromolecular complex;organelle;membrane-bounded organelle;non-membrane-bounded organelle;intracellular organelle;intracellular membrane-bounded organelle;intracellular non-membrane-bounded organelle					mmu:67681				20.677	180
IPI00154047	IPI00154047;IPI00885424	3-hydroxyisobutyryl-CoA hydrolase, mitochondrial;3-hydroxyisobutyryl-coenzyme A hydrolase	Hibch	3-hydroxyisobutyryl-CoA hydrolase, mitochondrial	6	5	4	-1.78492	0.0145743	-1.93107	-1.68546	-1.57639	-1.88437	60	48	Q8QZS1	HIBCH_MOUSE	ENSMUST00000044478	OTTMUSP00000039724	MGI:1923792	NP_666220	PF00378	ECH	Enoyl-CoA hydratase/isomerase family	GO:0005739;GO:0043226;GO:0043227;GO:0043229;GO:0043231;GO:0044424;GO:0044444;GO:0044464	mitochondrion;organelle;membrane-bounded organelle;intracellular organelle;intracellular membrane-bounded organelle;intracellular part;cytoplasmic part;cell part	GO:0003824;GO:0003860;GO:0016289;GO:0016787;GO:0016788;GO:0016790	catalytic activity;3-hydroxyisobutyryl-CoA hydrolase activity;CoA hydrolase activity;hydrolase activity;hydrolase activity, acting on ester bonds;thiolester hydrolase activity	GO:0006082;GO:0006519;GO:0006520;GO:0006807;GO:0008152;GO:0009056;GO:0009063;GO:0009081;GO:0009083;GO:0009308;GO:0009310;GO:0009987;GO:0016054;GO:0019752;GO:0034641;GO:0042180;GO:0043436;GO:0044106;GO:0044237;GO:0044238;GO:0044248;GO:0044270;GO:0046395	organic acid metabolic process;cellular amino acid and derivative metabolic process;cellular amino acid metabolic process;nitrogen compound metabolic process;metabolic process;catabolic process;cellular amino acid catabolic process	mmu:227095	ko00640;ko00280;ko00410	Propanoate metabolism;Valine, leucine and isoleucine degradation;beta-Alanine metabolism	K05605	43.037	385
IPI00187246	IPI00187246	WD repeat-containing protein 55	Wdr55	WD repeat-containing protein 55	4	4	2	-1.7747	0.0150468	-1.58071	-2.08276	-1.80861	-1.74079	159	93	Q9CX97;Q91X61	WDR55_MOUSE	ENSMUST00000049323		MGI:1915186	NP_080740	PF00400	WD40	WD domain, G-beta repeat	GO:0005730;GO:0005737;GO:0043226;GO:0043228;GO:0043229;GO:0043232;GO:0044422;GO:0044424;GO:0044428;GO:0044446;GO:0044464	nucleolus;cytoplasm;organelle;non-membrane-bounded organelle;intracellular organelle;intracellular non-membrane-bounded organelle;organelle part;intracellular part;nuclear part;intracellular organelle part;cell part			GO:0006139;GO:0006364;GO:0006396;GO:0006807;GO:0008152;GO:0009987;GO:0016070;GO:0016072;GO:0034470;GO:0034660;GO:0034960;GO:0043170;GO:0043283;GO:0044237;GO:0044238;GO:0044260	nucleobase, nucleoside, nucleotide and nucleic acid metabolic process;rRNA processing;RNA processing;nitrogen compound metabolic process;metabolic process;cellular process;RNA metabolic process;rRNA metabolic process;ncRNA processing	mmu:67936				42.61	388
IPI00225915	IPI00225915	RNA-binding protein 34;RNA-binding motif protein 34	Rbm34;D8Ertd233e	RNA binding motif protein 34	2	2	2	-1.76557	0.0154801	-2.00063	-1.51458	-2.16087	-1.5305	6	6	Q8C5L7;B2RUP0;Q571D9;Q8C545	RBM34_MOUSE	ENSMUST00000045994		MGI:1098653	NP_766350	PF00076	RRM_1	RNA recognition motif. (a.k.a. RRM, RBD, or RNP domain)	GO:0005730;GO:0043226;GO:0043228;GO:0043229;GO:0043232;GO:0044422;GO:0044424;GO:0044428;GO:0044446;GO:0044464	nucleolus;organelle;non-membrane-bounded organelle;intracellular organelle;intracellular non-membrane-bounded organelle;organelle part;intracellular part;nuclear part;intracellular organelle part;cell part	GO:0000166;GO:0003676;GO:0003723;GO:0005488	nucleotide binding;nucleic acid binding;RNA binding;binding			mmu:52202				49.116	442
IPI00123005	IPI00123005;IPI00762808;IPI00762287	Glutamate-rich WD repeat-containing protein 1;Protein A301;Glutamate-rich WD repeat containing 1	Grwd1;A301	Glutamate-rich WD repeat-containing protein 1;46 kDa protein;Glutamate-rich WD repeat containing 1	2	2	2	-1.76401	0.0155553	-1.74237	-1.76695	-2.03376	-1.76106	21	27	Q810D6;Q5XJZ3;Q8BIF7;Q8K335	GRWD1_MOUSE;Q8K335_MOUSE	ENSMUST00000066438;ENSMUST00000098448;ENSMUST00000107723	OTTMUSP00000045630;OTTMUSP00000045632	MGI:2141989;MGI:2141989	NP_700468	PF00400	WD40	WD domain, G-beta repeat	GO:0005730;GO:0043226;GO:0043228;GO:0043229;GO:0043232;GO:0044422;GO:0044424;GO:0044428;GO:0044446;GO:0044464	nucleolus;organelle;non-membrane-bounded organelle;intracellular organelle;intracellular non-membrane-bounded organelle;organelle part;intracellular part;nuclear part;intracellular organelle part;cell part					mmu:101612				49.233	446
IPI00469392	IPI00469392;IPI00270767;IPI00275539;IPI00470167	Reticulon-4;Neurite outgrowth inhibitor	Rtn4;Kiaa0886;Nogo	Isoform 1 of Reticulon-4;Isoform 2 of Reticulon-4	11	10	9	-1.75847	0.0158241	-1.82286	-1.69409	-2.04289	-1.1812	48	12	Q99P72-2;Q99P72;Q99P72-3	RTN4_MOUSE	ENSMUST00000060992;ENSMUST00000102843	OTTMUSP00000005509;OTTMUSP00000005512	MGI:1915835;MGI:1915835	NP_918943;NP_918940	PF02453	Reticulon	Reticulon	GO:0005635;GO:0016021;GO:0030176;GO:0031224;GO:0031227;GO:0031300;GO:0031301;GO:0031967;GO:0031975;GO:0042995;GO:0043025;GO:0044422;GO:0044424;GO:0044425;GO:0044428;GO:0044432;GO:0044444;GO:0044446;GO:0044464	nuclear envelope;integral to membrane;integral to endoplasmic reticulum membrane;intrinsic to membrane;intrinsic to endoplasmic reticulum membrane;intrinsic to organelle membrane;integral to organelle membrane;organelle envelope;envelope;cell projection			GO:0001525;GO:0010721;GO:0010769;GO:0010926;GO:0010975;GO:0019987;GO:0022603;GO:0022604;GO:0030516;GO:0030517;GO:0031344;GO:0031345;GO:0032502;GO:0045595;GO:0045596;GO:0045664;GO:0045767;GO:0048519;GO:0048523;GO:0048646;GO:0050767;GO:0050768;GO:0050770;GO:0050771;GO:0050789;GO:0050793;GO:0050794;GO:0051093;GO:0051128;GO:0051129;GO:0051239;GO:0051960;GO:0060284;GO:0065007	angiogenesis;negative regulation of cell development;regulation of cell morphogenesis involved in differentiation;anatomical structure formation;regulation of neuron projection development;negative regulation of anti-apoptosis					126.61	1162
IPI00133440	IPI00133440;IPI00649084;IPI00876224;IPI00890014;IPI00126917	Prohibitin;B-cell receptor-associated protein 32;Putative uncharacterized protein	Phb;RP23-17C2.2-002	Prohibitin;Prohibitin;Putative uncharacterized protein (Fragment);24 kDa protein	20	20	14	-1.7539	0.0160491	-1.81517	-1.62321	-1.9728	-1.69264	6	3	P67778;Q5SQG5;Q3TV00	PHB_MOUSE;Q5SQG5_MOUSE;Q3TV00_MOUSE	ENSMUST00000036374;ENSMUST00000087858	OTTMUSP00000001681;OTTMUSP00000001682	MGI:97572;MGI:97572;MGI:97572	NP_032857	PF01145	Band_7	SPFH domain / Band 7 family	GO:0005743;GO:0016020;GO:0019866;GO:0031090;GO:0031966;GO:0044422;GO:0044424;GO:0044429;GO:0044444;GO:0044446;GO:0044464	mitochondrial inner membrane;membrane;organelle inner membrane;organelle membrane;mitochondrial membrane;organelle part;intracellular part;mitochondrial part;cytoplasmic part;intracellular organelle part;cell part	GO:0005488;GO:0005515	binding;protein binding	GO:0006139;GO:0006259;GO:0006260;GO:0006807;GO:0008152;GO:0009058;GO:0009059;GO:0009987;GO:0034645;GO:0034960;GO:0034961;GO:0043170;GO:0043283;GO:0043284;GO:0044237;GO:0044238;GO:0044249;GO:0044260	nucleobase, nucleoside, nucleotide and nucleic acid metabolic process;DNA metabolic process;DNA replication;nitrogen compound metabolic process;metabolic process;biosynthetic process;macromolecule biosynthetic process;cellular process	mmu:18673				29.82	272
IPI00118986	IPI00118986;IPI00461407;IPI00919068	ATP synthase subunit O, mitochondrial;Oligomycin sensitivity conferral protein	Atp5o;D12Wsu28e	ATP synthase subunit O, mitochondrial;hypothetical protein	17	16	11	-1.75184	0.0161515	-1.75302	-2.01309	-1.66185	-1.75067	27	27	Q9DB20;Q3TF25;Q3THG0	ATPO_MOUSE	ENSMUST00000023677	OTTMUSP00000031018	MGI:106341	NP_613063;XP_001478145;XP_484160;XP_911178	PF00213	OSCP	ATP synthase delta (OSCP) subunit	GO:0005743;GO:0016020;GO:0019866;GO:0031090;GO:0031966;GO:0032991;GO:0033178;GO:0043234;GO:0044422;GO:0044424;GO:0044425;GO:0044429;GO:0044444;GO:0044446;GO:0044464;GO:0045261	mitochondrial inner membrane;membrane;organelle inner membrane;organelle membrane;mitochondrial membrane;macromolecular complex;proton-transporting two-sector ATPase complex, catalytic domain;protein complex;organelle part;intracellular part;membrane part	GO:0003824;GO:0005215;GO:0008324;GO:0015075;GO:0015077;GO:0015078;GO:0015399;GO:0015405;GO:0016462;GO:0016787;GO:0016817;GO:0016818;GO:0016820;GO:0016887;GO:0017111;GO:0019829;GO:0022804;GO:0022857;GO:0022890;GO:0022891;GO:0022892;GO:0042623;GO:0042625;GO:0042626;GO:0043492;GO:0046933;GO:0046961	catalytic activity;transporter activity;cation transmembrane transporter activity;ion transmembrane transporter activity;monovalent inorganic cation transmembrane transporter activity;hydrogen ion transmembrane transporter activity	GO:0006139;GO:0006163;GO:0006164;GO:0006753;GO:0006754;GO:0006807;GO:0006810;GO:0006811;GO:0006812;GO:0006818;GO:0008152;GO:0009058;GO:0009117;GO:0009141;GO:0009142;GO:0009144;GO:0009145;GO:0009150;GO:0009152;GO:0009165;GO:0009199;GO:0009201;GO:0009205;GO:0009206;GO:0009259;GO:0009260;GO:0009987;GO:0015672;GO:0015985;GO:0015986;GO:0015992;GO:0034220;GO:0044237;GO:0044238;GO:0044249;GO:0046034;GO:…	nucleobase, nucleoside, nucleotide and nucleic acid metabolic process;purine nucleotide metabolic process;purine nucleotide biosynthetic process;nucleoside phosphate metabolic process;ATP biosynthetic process;nitrogen compound metabolic process;transport	mmu:100047429;mmu:28080	ko00190;ko05010;ko05012;ko05016	Oxidative phosphorylation;Alzheimer's disease;Parkinson's disease;Huntington's disease	K02137	23.363	213
IPI00165902	IPI00165902	Mitochondrial import inner membrane translocase subunit Tim10	Timm10;Tim10	Mitochondrial import inner membrane translocase subunit Tim10	3	3	3	-1.74011	0.0167449	-1.79071	-1.68952	-1.92936	-1.33694	30	21	P62073;A2ATS2	TIM10_MOUSE	ENSMUST00000028470;ENSMUST00000111631	OTTMUSP00000014697;OTTMUSP00000014698	MGI:1353429	NP_038927	PF02953	zf-Tim10_DDP	Tim10/DDP family zinc finger	GO:0005743;GO:0016020;GO:0019866;GO:0031090;GO:0031966;GO:0032991;GO:0042719;GO:0043234;GO:0044422;GO:0044424;GO:0044429;GO:0044444;GO:0044446;GO:0044464	mitochondrial inner membrane;membrane;organelle inner membrane;organelle membrane;mitochondrial membrane;macromolecular complex;mitochondrial intermembrane space protein transporter complex;protein complex;organelle part;intracellular part	GO:0005488;GO:0005515;GO:0008270;GO:0043167;GO:0043169;GO:0046872;GO:0046914	binding;protein binding;zinc ion binding;ion binding;cation binding;metal ion binding;transition metal ion binding	GO:0006605;GO:0006612;GO:0006626;GO:0006810;GO:0006839;GO:0006886;GO:0006996;GO:0007005;GO:0007006;GO:0007007;GO:0009987;GO:0015031;GO:0016043;GO:0016044;GO:0017038;GO:0045039;GO:0045184;GO:0046907;GO:0051234;GO:0051649;GO:0055085;GO:0065002	protein targeting;protein targeting to membrane;protein targeting to mitochondrion;transport;mitochondrial transport;intracellular protein transport;organelle organization;mitochondrion organization;mitochondrial membrane organization	mmu:30059				10.333	90
IPI00454049	IPI00454049;IPI00886151;IPI00459020	Enoyl-CoA hydratase, mitochondrial;Short chain enoyl-CoA hydratase;Enoyl-CoA hydratase 1	Echs1	Enoyl-CoA hydratase, mitochondrial	9	9	5	-1.73539	0.0169891	-1.92102	-2.31649	-1.54976	-1.50024	330	240	Q8BH95	ECHM_MOUSE	ENSMUST00000026538	OTTMUSP00000033956	MGI:2136460	NP_444349	PF00378	ECH	Enoyl-CoA hydratase/isomerase family	GO:0005759;GO:0044422;GO:0044424;GO:0044429;GO:0044444;GO:0044446;GO:0044464	mitochondrial matrix;organelle part;intracellular part;mitochondrial part;cytoplasmic part;intracellular organelle part;cell part	GO:0003824;GO:0004300;GO:0016829;GO:0016835;GO:0016836	catalytic activity;enoyl-CoA hydratase activity;lyase activity;carbon-oxygen lyase activity;hydro-lyase activity	GO:0006082;GO:0006629;GO:0006631;GO:0008152;GO:0009987;GO:0019752;GO:0032787;GO:0042180;GO:0043436;GO:0044237;GO:0044238;GO:0044255	organic acid metabolic process;lipid metabolic process;fatty acid metabolic process;metabolic process;cellular process;carboxylic acid metabolic process;monocarboxylic acid metabolic process;cellular ketone metabolic process;oxoacid metabolic process	mmu:93747	ko00640;ko00650;ko00062;ko00071;ko00280;ko00310;ko00380;ko00410;ko00903;ko00930;ko00632	Propanoate metabolism;Butanoate metabolism;Fatty acid elongation in mitochondria;Fatty acid metabolism;Valine, leucine and isoleucine degradation;Lysine degradation;Tryptophan metabolism;beta-Alanine metabolism;Limonene and pinene degradation;Caprolactam degradation;Benzoate degradation via CoA ligation	K07511	31.474	290
IPI00129516	IPI00129516;IPI00473819	Cytochrome b-c1 complex subunit 6, mitochondrial;Ubiquinol-cytochrome c reductase complex 11 kDa protein;Cytochrome c1 non-heme 11 kDa protein;Mitochondrial hinge protein;Complex III subunit VIII;Complex III subunit 6	Uqcrh	Cytochrome b-c1 complex subunit 6, mitochondrial	4	3	3	-1.73365	0.0170797	-1.09466	-2.12999	-1.33731	-2.7474	27	21	P99028;B1ASG5;Q8BMU6	QCR6_MOUSE	ENSMUST00000078676	OTTMUSP00000009095	MGI:1913826	NP_079917	PF02320	UCR_hinge	Ubiquinol-cytochrome C reductase hinge protein	GO:0005743;GO:0016020;GO:0019866;GO:0031090;GO:0031966;GO:0044422;GO:0044424;GO:0044425;GO:0044429;GO:0044444;GO:0044446;GO:0044464;GO:0070469	mitochondrial inner membrane;membrane;organelle inner membrane;organelle membrane;mitochondrial membrane;organelle part;intracellular part;membrane part;mitochondrial part;cytoplasmic part;intracellular organelle part;cell part;respiratory chain	GO:0003824;GO:0005215;GO:0008121;GO:0008324;GO:0015075;GO:0015077;GO:0015078;GO:0016491;GO:0016679;GO:0016681;GO:0022857;GO:0022890;GO:0022891;GO:0022892	catalytic activity;transporter activity;ubiquinol-cytochrome-c reductase activity;cation transmembrane transporter activity;ion transmembrane transporter activity;monovalent inorganic cation transmembrane transporter activity	GO:0006091;GO:0006122;GO:0006810;GO:0008152;GO:0009987;GO:0022900;GO:0022904;GO:0044237;GO:0051234;GO:0055114	generation of precursor metabolites and energy;mitochondrial electron transport, ubiquinol to cytochrome c;transport;metabolic process;cellular process;electron transport chain;respiratory electron transport chain;cellular metabolic process	mmu:66576	ko00190;ko04260;ko05010;ko05012;ko05016	Oxidative phosphorylation;Cardiac muscle contraction;Alzheimer's disease;Parkinson's disease;Huntington's disease	K00416	10.435	89
IPI00469941	IPI00469941;IPI00848728	Enhanced at puberty protein 1	Eap1;Kiaa1865	Enhanced at puberty protein 1;similar to polyglutamine-containing protein	12	11	10	-1.73273	0.0171278	-1.38843	-1.80485	-1.66061	-2.12118	21	15	Q8K3X4	EAP1_MOUSE	ENSMUST00000038422		MGI:2442463	NP_665835;XP_001473784				GO:0005634;GO:0043226;GO:0043227;GO:0043229;GO:0043231;GO:0044424;GO:0044464	nucleus;organelle;membrane-bounded organelle;intracellular organelle;intracellular membrane-bounded organelle;intracellular part;cell part					mmu:238330				80.564	775
IPI00130436	IPI00130436	Brix domain-containing protein 2;Ribosome biogenesis protein Brix	Bxdc2;Brix	Ribosome biogenesis protein BRX1 homolog	2	2	1	-1.73268	0.0171304	-1.66257	-1.80279	-1.61848	-1.91005	591	598	Q9DCA5;Q8CEX3	BXDC2_MOUSE	ENSMUST00000022855		MGI:1915082	NP_080672	PF04427	Brix	Brix domain	GO:0005730;GO:0043226;GO:0043228;GO:0043229;GO:0043232;GO:0044422;GO:0044424;GO:0044428;GO:0044446;GO:0044464	nucleolus;organelle;non-membrane-bounded organelle;intracellular organelle;intracellular non-membrane-bounded organelle;organelle part;intracellular part;nuclear part;intracellular organelle part;cell part	GO:0005488;GO:0005515	binding;protein binding	GO:0009987;GO:0022613;GO:0042254;GO:0044085	cellular process;ribonucleoprotein complex biogenesis;ribosome biogenesis;cellular component biogenesis	mmu:67832				41.241	353
IPI00112219	IPI00112219	Prospero homeobox protein 1;Homeobox prospero-like protein PROX1	Prox1	Prospero homeobox protein 1	8	6	6	-1.73208	0.017162	-1.51114	-1.95302	-1.4169	-2.02876	63	27	P48437	PROX1_MOUSE	ENSMUST00000010319		MGI:97772	NP_032963	PF05044	Prox1	Homeobox prospero-like protein (PROX1)	GO:0005634;GO:0005737;GO:0043226;GO:0043227;GO:0043229;GO:0043231;GO:0044424;GO:0044464	nucleus;cytoplasm;organelle;membrane-bounded organelle;intracellular organelle;intracellular membrane-bounded organelle;intracellular part;cell part	GO:0003676;GO:0003677;GO:0003700;GO:0003702;GO:0003705;GO:0005488;GO:0030528	nucleic acid binding;DNA binding;transcription factor activity;RNA polymerase II transcription factor activity;RNA polymerase II transcription factor activity, enhancer binding;binding;transcription regulator activity	GO:0000902;GO:0000904;GO:0001709;GO:0001743;GO:0001944;GO:0001945;GO:0006139;GO:0006350;GO:0006355;GO:0006807;GO:0006996;GO:0007010;GO:0007015;GO:0008152;GO:0008285;GO:0009058;GO:0009059;GO:0009653;GO:0009887;GO:0009889;GO:0009987;GO:0010468;GO:0010556;GO:0010638;GO:0010926;GO:0010927;GO:0016043;GO:0016202;GO:0019219;GO:0019222;GO:0022603;GO:0022607;GO:0030029;GO:0030036;GO:0030154;GO:0030239;GO:…	cell morphogenesis;cell morphogenesis involved in differentiation;cell fate determination;optic placode formation;vasculature development;lymph vessel development;nucleobase, nucleoside, nucleotide and nucleic acid metabolic process;transcription	mmu:19130				83.125	737
IPI00109109	IPI00109109	Superoxide dismutase [Mn], mitochondrial	Sod2;Sod-2	Superoxide dismutase [Mn], mitochondrial	7	6	5	-1.73099	0.0172194	-2.15787	-1.30411	-2.49624	-1.14936	18	15	P09671;Q3TJA2;Q3U8W4;Q4FJX9	SODM_MOUSE	ENSMUST00000007012		MGI:98352	NP_038699	PF02777;PF00081	Sod_Fe_C;Sod_Fe_N	Iron/manganese superoxide dismutases, C-terminal domain;Iron/manganese superoxide dismutases, alpha-hairpin domain	GO:0005743;GO:0005759;GO:0016020;GO:0019866;GO:0031090;GO:0031966;GO:0044422;GO:0044424;GO:0044429;GO:0044444;GO:0044446;GO:0044464	mitochondrial inner membrane;mitochondrial matrix;membrane;organelle inner membrane;organelle membrane;mitochondrial membrane;organelle part;intracellular part;mitochondrial part;cytoplasmic part;intracellular organelle part;cell part	GO:0003824;GO:0004784;GO:0005488;GO:0016491;GO:0016721;GO:0030145;GO:0043167;GO:0043169;GO:0046872;GO:0046914	catalytic activity;superoxide dismutase activity;binding;oxidoreductase activity;oxidoreductase activity, acting on superoxide radicals as acceptor;manganese ion binding;ion binding;cation binding;metal ion binding;transition metal ion binding	GO:0000302;GO:0000303;GO:0000305;GO:0001306;GO:0001315;GO:0001836;GO:0001889;GO:0003008;GO:0003013;GO:0003018;GO:0003032;GO:0003069;GO:0006091;GO:0006139;GO:0006259;GO:0006281;GO:0006302;GO:0006355;GO:0006357;GO:0006518;GO:0006519;GO:0006575;GO:0006732;GO:0006749;GO:0006790;GO:0006800;GO:0006801;GO:0006807;GO:0006873;GO:0006950;GO:0006974;GO:0006979;GO:0006996;GO:0007005;GO:0007507;GO:0007568;GO:…	response to reactive oxygen species;response to superoxide;response to oxygen radical;age-dependent response to oxidative stress;age-dependent response to reactive oxygen species;release of cytochrome c from mitochondria;liver development;system process	mmu:20656	ko05016	Huntington's disease	K04564	24.603	222
IPI00275050	IPI00275050;IPI00402997	28S ribosomal protein S29, mitochondrial;MRP-S29;Death-associated protein 3	Dap3;Mrps29	death-associated protein 3 isoform 2;death-associated protein 3 isoform 1	3	2	3	-1.72908	0.01732	-1.45764	-1.803	-1.65516	-1.89392	183	117	Q9ER88-1;Q9ER88;Q9ER88-2	RT29_MOUSE	ENSMUST00000090938;ENSMUST00000107491	OTTMUSP00000041067	MGI:1929538;MGI:1929538	NP_075370;NP_001158005	PF10236	DAP3	Mitochondrial ribosomal death-associated protein 3	GO:0000313;GO:0005761;GO:0005840;GO:0015935;GO:0030529;GO:0032991;GO:0033279;GO:0043226;GO:0043228;GO:0043229;GO:0043232;GO:0044422;GO:0044424;GO:0044429;GO:0044444;GO:0044446;GO:0044464	organellar ribosome;mitochondrial ribosome;ribosome;small ribosomal subunit;ribonucleoprotein complex;macromolecular complex;ribosomal subunit;organelle;non-membrane-bounded organelle;intracellular organelle;intracellular non-membrane-bounded organelle			GO:0006996;GO:0007005;GO:0008637;GO:0009987;GO:0016043	organelle organization;mitochondrion organization;apoptotic mitochondrial changes;cellular process;cellular component organization	mmu:65111				45.287	396
IPI00625950	IPI00625950;IPI00128491	Adenine phosphoribosyl transferase;Adenine phosphoribosyltransferase	Aprt;aprt	adenine phosphoribosyltransferase;Adenine phosphoribosyltransferase	11	9	8	-1.72586	0.0174912	-1.74949	-1.72827	-1.72344	-1.7109	24	18	Q564P4;Q61319;Q6PK77;Q9DCY3;P08030	Q564P4_MOUSE;APT_MOUSE	ENSMUST00000006764		MGI:88061;MGI:88061	NP_033828	PF00156	Pribosyltran	Phosphoribosyl transferase domain	GO:0005737;GO:0044424;GO:0044464	cytoplasm;intracellular part;cell part	GO:0000166;GO:0001882;GO:0001883;GO:0002054;GO:0002055;GO:0002060;GO:0003824;GO:0003999;GO:0005488;GO:0005515;GO:0016208;GO:0016740;GO:0016757;GO:0016763;GO:0017076;GO:0030554;GO:0032553;GO:0032555;GO:0032559	nucleotide binding;nucleoside binding;purine nucleoside binding;nucleobase binding;adenine binding;purine binding;catalytic activity;adenine phosphoribosyltransferase activity;binding;protein binding;AMP binding;transferase activity	GO:0006139;GO:0006144;GO:0006166;GO:0006168;GO:0006725;GO:0006807;GO:0007610;GO:0007625;GO:0008152;GO:0009112;GO:0009116;GO:0009119;GO:0009987;GO:0042278;GO:0043094;GO:0043096;GO:0043101;GO:0043174;GO:0044237;GO:0044238;GO:0046083;GO:0046128;GO:0046483;GO:0050896;GO:0055086	nucleobase, nucleoside, nucleotide and nucleic acid metabolic process;purine base metabolic process;purine ribonucleoside salvage;adenine salvage;cellular aromatic compound metabolic process;nitrogen compound metabolic process;behavior;grooming behavior	mmu:11821	ko00230	Purine metabolism	K00759	19.724	180
IPI00331597	IPI00331597	Histone H1.3;H1 VAR.4;H1d	Hist1h1d;H1f3	Histone H1.3	3	3	3	-1.72051	0.0177783	-2.81888	-1.11603	-2.32498	0.539188	42	24	P43277;Q149Z9;Q3U292	H13_MOUSE	ENSMUST00000045301	OTTMUSP00000000521	MGI:107502	NP_663759	PF00538	Linker_histone	linker histone H1 and H5 family	GO:0000786;GO:0005634;GO:0032991;GO:0032993;GO:0043226;GO:0043227;GO:0043229;GO:0043231;GO:0044422;GO:0044424;GO:0044427;GO:0044446;GO:0044464	nucleosome;nucleus;macromolecular complex;protein-DNA complex;organelle;membrane-bounded organelle;intracellular organelle;intracellular membrane-bounded organelle;organelle part;intracellular part;chromosomal part;intracellular organelle part;cell part	GO:0003676;GO:0003677;GO:0005488;GO:0005515	nucleic acid binding;DNA binding;binding;protein binding	GO:0006325;GO:0006333;GO:0006334;GO:0006996;GO:0009987;GO:0010926;GO:0016043;GO:0016584;GO:0022607;GO:0031497;GO:0034621;GO:0034622;GO:0034728;GO:0043933;GO:0051276;GO:0065003;GO:0065004	chromatin organization;chromatin assembly or disassembly;nucleosome assembly;organelle organization;cellular process;anatomical structure formation;cellular component organization;nucleosome positioning;cellular component assembly;chromatin assembly	mmu:14957			K11275	22.099	221
IPI00462762	IPI00462762	U3 small nucleolar RNA-associated protein 14 homolog A;Juvenile spermatogonial depletion-like X-linked protein	Utp14a;JsdX;Kiaa0266	Isoform 1 of U3 small nucleolar RNA-associated protein 14 homolog A	5	3	4	-1.71398	0.0181343	-1.6063	-1.83077	-1.82166	-1.16214	270	213	Q640M1-1;Q640M1;Q3UYD0;Q3UYV5	UT14A_MOUSE	ENSMUST00000080713;ENSMUST00000114979	OTTMUSP00000019120	MGI:1919804	NP_082552	PF04615	Utp14	Utp14 protein	GO:0005730;GO:0030529;GO:0030684;GO:0032040;GO:0032991;GO:0043226;GO:0043228;GO:0043229;GO:0043232;GO:0044422;GO:0044424;GO:0044428;GO:0044446;GO:0044464	nucleolus;ribonucleoprotein complex;preribosome;small-subunit processome;macromolecular complex;organelle;non-membrane-bounded organelle;intracellular organelle;intracellular non-membrane-bounded organelle;organelle part;intracellular part;nuclear part			GO:0006139;GO:0006364;GO:0006396;GO:0006807;GO:0008152;GO:0009987;GO:0016070;GO:0016072;GO:0034470;GO:0034660;GO:0034960;GO:0043170;GO:0043283;GO:0044237;GO:0044238;GO:0044260	nucleobase, nucleoside, nucleotide and nucleic acid metabolic process;rRNA processing;RNA processing;nitrogen compound metabolic process;metabolic process;cellular process;RNA metabolic process;rRNA metabolic process;ncRNA processing	mmu:72554				87.264	767
IPI00331361	IPI00331361;IPI00652799	Myb-binding protein 1A;Myb-binding protein of 160 kDa;Putative uncharacterized protein	Mybbp1a;P160	Myb-binding protein 1A;Putative uncharacterized protein	33	30	21	-1.71205	0.018241	-1.57325	-1.85084	-1.50506	-2.55564	21	18	Q7TPV4;A0JLT5;Q3U2W2;Q3TLF6	MBB1A_MOUSE;Q3TLF6_MOUSE	ENSMUST00000045633;ENSMUST00000100899	OTTMUSP00000006405	MGI:106181;MGI:106181	NP_058056	PF04931	DNA_pol_phi	DNA polymerase phi	GO:0005730;GO:0005737;GO:0031074;GO:0032991;GO:0042564;GO:0043226;GO:0043228;GO:0043229;GO:0043232;GO:0043234;GO:0044422;GO:0044424;GO:0044428;GO:0044446;GO:0044464	nucleolus;cytoplasm;nucleocytoplasmic shuttling complex;macromolecular complex;NLS-dependent protein nuclear import complex;organelle;non-membrane-bounded organelle;intracellular organelle;intracellular non-membrane-bounded organelle;protein complex	GO:0003676;GO:0003677;GO:0003824;GO:0003887;GO:0005488;GO:0005515;GO:0008134;GO:0008270;GO:0016564;GO:0016740;GO:0016772;GO:0016779;GO:0030528;GO:0034061;GO:0043167;GO:0043169;GO:0046872;GO:0046914	nucleic acid binding;DNA binding;catalytic activity;DNA-directed DNA polymerase activity;binding;protein binding;transcription factor binding;zinc ion binding;transcription repressor activity;transferase activity	GO:0006091;GO:0006139;GO:0006350;GO:0006355;GO:0006807;GO:0006810;GO:0006913;GO:0008152;GO:0009058;GO:0009059;GO:0009889;GO:0009890;GO:0009892;GO:0009987;GO:0010468;GO:0010556;GO:0010558;GO:0010605;GO:0010629;GO:0016481;GO:0019219;GO:0019222;GO:0022900;GO:0022904;GO:0031323;GO:0031324;GO:0031326;GO:0031327;GO:0034645;GO:0034960;GO:0034961;GO:0043170;GO:0043283;GO:0043284;GO:0044237;GO:0044238;GO:…	generation of precursor metabolites and energy;nucleobase, nucleoside, nucleotide and nucleic acid metabolic process;transcription;regulation of transcription, DNA-dependent;nitrogen compound metabolic process;transport;nucleocytoplasmic transport	mmu:18432			K02331	152.04	1344
IPI00620167	IPI00620167	Pescadillo homolog	Pes1;Pes	Pescadillo homolog 1, containing BRCT domain	3	1	2	-1.71046	0.0183286	-1.80273	-1.50283	-1.90825	-1.6182	39	39	Q9EQ61;Q5SQ20	PESC_MOUSE	ENSMUST00000020705;ENSMUST00000109985	OTTMUSP00000005229	MGI:1890613	NP_075027	PF00533;PF06732	BRCT;Pescadillo_N	BRCA1 C Terminus (BRCT) domain;Pescadillo N-terminus	GO:0000793;GO:0005654;GO:0005694;GO:0030529;GO:0030684;GO:0030687;GO:0032991;GO:0043226;GO:0043228;GO:0043229;GO:0043232;GO:0043234;GO:0044422;GO:0044424;GO:0044428;GO:0044446;GO:0044452;GO:0044464;GO:0070545	condensed chromosome;nucleoplasm;chromosome;ribonucleoprotein complex;preribosome;preribosome, large subunit precursor;macromolecular complex;organelle;non-membrane-bounded organelle;intracellular organelle;intracellular non-membrane-bounded organelle			GO:0000089;GO:0000460;GO:0000463;GO:0000466;GO:0000470;GO:0006139;GO:0006364;GO:0006396;GO:0006807;GO:0006996;GO:0006997;GO:0007000;GO:0008152;GO:0008283;GO:0009987;GO:0016043;GO:0016070;GO:0016072;GO:0022402;GO:0022403;GO:0034470;GO:0034660;GO:0034960;GO:0043170;GO:0043283;GO:0044237;GO:0044238;GO:0044260;GO:0051323	mitotic metaphase;maturation of 5.8S rRNA;maturation of LSU-rRNA from tricistronic rRNA transcript (SSU-rRNA, 5.8S rRNA, LSU-rRNA);maturation of 5.8S rRNA from tricistronic rRNA transcript (SSU-rRNA, 5.8S rRNA, LSU-rRNA);maturation of LSU-rRNA	mmu:64934				68.23	588
IPI00761722	IPI00761722;IPI00278781	Mitochondrial ribosomal protein L43	Mrpl43;mCG_16934	mitochondrial ribosomal protein L43	3	3	1	-1.70714	0.018514	-1.68827	-1.82763	-1.47902	-1.72601	21	18	Q5RL20;Q6P060;Q810B1	Q5RL20_MOUSE	ENSMUST00000052320;ENSMUST00000097715		MGI:2137229	NP_444394	PF05047	L51_S25_CI-B8	Mitochondrial ribosomal protein L51 / S25 / CI-B8 domain	GO:0000315;GO:0005762;GO:0015934;GO:0030529;GO:0032991;GO:0033279;GO:0044422;GO:0044424;GO:0044429;GO:0044444;GO:0044446;GO:0044464	organellar large ribosomal subunit;mitochondrial large ribosomal subunit;large ribosomal subunit;ribonucleoprotein complex;macromolecular complex;ribosomal subunit;organelle part;intracellular part;mitochondrial part;cytoplasmic part			GO:0006412;GO:0008152;GO:0009058;GO:0009059;GO:0009987;GO:0019538;GO:0034645;GO:0034960;GO:0034961;GO:0043170;GO:0043283;GO:0043284;GO:0044237;GO:0044238;GO:0044249;GO:0044260;GO:0044267	translation;metabolic process;biosynthetic process;macromolecule biosynthetic process;cellular process;protein metabolic process;cellular macromolecule biosynthetic process;cellular biopolymer metabolic process;cellular biopolymer biosynthetic process	mmu:94067				17.877	159
IPI00137787	IPI00137787	60S ribosomal protein L8	Rpl8	60S ribosomal protein L8	17	17	14	-1.69318	0.0193091	-1.84474	-1.55866	-1.58369	-1.80268	66	51	P62918;Q3THC7;Q3UJS0;Q9Z237	RL8_MOUSE	ENSMUST00000004072		MGI:1350927	NP_036183	PF00181;PF03947	Ribosomal_L2;Ribosomal_L2_C	Ribosomal Proteins L2, RNA binding domain;Ribosomal Proteins L2, C-terminal domain	GO:0005840;GO:0030529;GO:0032991;GO:0043226;GO:0043228;GO:0043229;GO:0043232;GO:0044424;GO:0044444;GO:0044464	ribosome;ribonucleoprotein complex;macromolecular complex;organelle;non-membrane-bounded organelle;intracellular organelle;intracellular non-membrane-bounded organelle;intracellular part;cytoplasmic part;cell part	GO:0003676;GO:0003723;GO:0003735;GO:0005198;GO:0005488;GO:0019843	nucleic acid binding;RNA binding;structural constituent of ribosome;structural molecule activity;binding;rRNA binding	GO:0006412;GO:0008152;GO:0009058;GO:0009059;GO:0009987;GO:0019538;GO:0034645;GO:0034960;GO:0034961;GO:0043170;GO:0043283;GO:0043284;GO:0044237;GO:0044238;GO:0044249;GO:0044260;GO:0044267	translation;metabolic process;biosynthetic process;macromolecule biosynthetic process;cellular process;protein metabolic process;cellular macromolecule biosynthetic process;cellular biopolymer metabolic process;cellular biopolymer biosynthetic process	mmu:26961	ko03010	Ribosome	K02938	28.024	257
IPI00169925	IPI00169925;IPI00845716	NADH dehydrogenase [ubiquinone] flavoprotein 2, mitochondrial;NADH-ubiquinone oxidoreductase 24 kDa subunit	Ndufv2	Isoform 1 of NADH dehydrogenase [ubiquinone] flavoprotein 2, mitochondrial;Isoform 2 of NADH dehydrogenase [ubiquinone] flavoprotein 2, mitochondrial	5	4	3	-1.69171	0.0193946	-1.45859	-1.8971	-1.48633	-2.0734	60	27	Q9D6J6-1;Q9D6J6;Q9D6J6-2	NDUV2_MOUSE	ENSMUST00000024909	OTTMUSP00000017460	MGI:1920150;MGI:1920150	NP_082664	PF01257	Complex1_24kDa	Respiratory-chain NADH dehydrogenase 24 Kd subunit	GO:0005743;GO:0016020;GO:0019866;GO:0031090;GO:0031966;GO:0044422;GO:0044424;GO:0044425;GO:0044429;GO:0044444;GO:0044446;GO:0044464;GO:0070469	mitochondrial inner membrane;membrane;organelle inner membrane;organelle membrane;mitochondrial membrane;organelle part;intracellular part;membrane part;mitochondrial part;cytoplasmic part;intracellular organelle part;cell part;respiratory chain	GO:0000166;GO:0003824;GO:0003954;GO:0005488;GO:0005506;GO:0008137;GO:0009055;GO:0016491;GO:0016651;GO:0016655;GO:0043167;GO:0043169;GO:0046872;GO:0046914;GO:0048037;GO:0050136;GO:0050662;GO:0051287;GO:0051536;GO:0051537;GO:0051540	nucleotide binding;catalytic activity;NADH dehydrogenase activity;binding;iron ion binding;NADH dehydrogenase (ubiquinone) activity;electron carrier activity;oxidoreductase activity;oxidoreductase activity, acting on NADH or NADPH	GO:0006091;GO:0006810;GO:0008152;GO:0009987;GO:0022900;GO:0044237;GO:0051234;GO:0055114	generation of precursor metabolites and energy;transport;metabolic process;cellular process;electron transport chain;cellular metabolic process;establishment of localization;oxidation reduction	mmu:72900	ko00190;ko05010;ko05012;ko05016	Oxidative phosphorylation;Alzheimer's disease;Parkinson's disease;Huntington's disease	K03943	27.285	248
IPI00468481	IPI00468481	ATP synthase subunit beta, mitochondrial	Atp5b	ATP synthase subunit beta, mitochondrial	36	33	33	-1.69068	0.0194547	-1.56931	-1.97565	-1.40577	-1.81205	45	33	P56480	ATPB_MOUSE	ENSMUST00000026459	OTTMUSP00000027963	MGI:107801	NP_058054	PF00006;PF00306;PF02874	ATP-synt_ab;ATP-synt_ab_C;ATP-synt_ab_N	ATP synthase alpha/beta family, nucleotide-binding domain;ATP synthase alpha/beta chain, C terminal domain;ATP synthase alpha/beta family, beta-barrel domain	GO:0005743;GO:0016020;GO:0019866;GO:0031090;GO:0031966;GO:0032991;GO:0033178;GO:0043234;GO:0044422;GO:0044424;GO:0044425;GO:0044429;GO:0044444;GO:0044446;GO:0044464;GO:0045261	mitochondrial inner membrane;membrane;organelle inner membrane;organelle membrane;mitochondrial membrane;macromolecular complex;proton-transporting two-sector ATPase complex, catalytic domain;protein complex;organelle part;intracellular part;membrane part	GO:0000166;GO:0001882;GO:0001883;GO:0003824;GO:0005215;GO:0005488;GO:0005524;GO:0008324;GO:0008553;GO:0015075;GO:0015077;GO:0015078;GO:0015399;GO:0015405;GO:0015662;GO:0016462;GO:0016787;GO:0016817;GO:0016818;GO:0016820;GO:0016887;GO:0017076;GO:0017111;GO:0019829;GO:0022804;GO:0022857;GO:0022890;GO:0022891;GO:0022892;GO:0030554;GO:0032553;GO:0032555;GO:0032559;GO:0042623;GO:0042625;GO:0042626;GO:…	nucleotide binding;nucleoside binding;purine nucleoside binding;catalytic activity;transporter activity;binding;ATP binding;cation transmembrane transporter activity;hydrogen-exporting ATPase activity, phosphorylative mechanism	GO:0006139;GO:0006163;GO:0006164;GO:0006629;GO:0006753;GO:0006754;GO:0006807;GO:0006810;GO:0006811;GO:0006812;GO:0006818;GO:0006933;GO:0007162;GO:0008152;GO:0009058;GO:0009117;GO:0009141;GO:0009142;GO:0009144;GO:0009145;GO:0009150;GO:0009152;GO:0009165;GO:0009199;GO:0009201;GO:0009205;GO:0009206;GO:0009259;GO:0009260;GO:0009987;GO:0015672;GO:0015985;GO:0015986;GO:0015992;GO:0030155;GO:0034220;GO:…	nucleobase, nucleoside, nucleotide and nucleic acid metabolic process;purine nucleotide metabolic process;purine nucleotide biosynthetic process;lipid metabolic process;nucleoside phosphate metabolic process;ATP biosynthetic process	mmu:11947	ko00190;ko05010;ko05012;ko05016	Oxidative phosphorylation;Alzheimer's disease;Parkinson's disease;Huntington's disease	K02133	56.3	529
IPI00170126	IPI00170126;IPI00788337;IPI00788353	Presequence protease, mitochondrial;Pitrilysin metalloproteinase 1	Pitrm1;Kiaa1104;Ntup1	Isoform 1 of Presequence protease, mitochondrial;Isoform 2 of Presequence protease, mitochondrial;Isoform 3 of Presequence protease, mitochondrial	7	5	6	-1.68989	0.0195011	-1.54272	-1.86316	-1.83705	-1.35833	87	66	Q8K411-1;Q8K411;Q8K411-2;Q8K411-3	PREP_MOUSE	ENSMUST00000021611;ENSMUST00000110683		MGI:1916867;MGI:1916867;MGI:1916867	NP_660113	PF08367;PF05193	M16C_assoc;Peptidase_M16_C	Peptidase M16C associated;Peptidase M16 inactive domain	GO:0005759;GO:0044422;GO:0044424;GO:0044429;GO:0044444;GO:0044446;GO:0044464	mitochondrial matrix;organelle part;intracellular part;mitochondrial part;cytoplasmic part;intracellular organelle part;cell part	GO:0003824;GO:0004175;GO:0004222;GO:0005488;GO:0008233;GO:0008237;GO:0008270;GO:0016787;GO:0043167;GO:0043169;GO:0046872;GO:0046914;GO:0070011	catalytic activity;endopeptidase activity;metalloendopeptidase activity;binding;peptidase activity;metallopeptidase activity;zinc ion binding;hydrolase activity;ion binding;cation binding;metal ion binding;transition metal ion binding	GO:0006508;GO:0008152;GO:0009056;GO:0009057;GO:0019538;GO:0030163;GO:0043170;GO:0043283;GO:0043285;GO:0044238	proteolysis;metabolic process;catabolic process;macromolecule catabolic process;protein metabolic process;protein catabolic process;macromolecule metabolic process;biopolymer metabolic process;biopolymer catabolic process;primary metabolic process	mmu:69617			K06972	117.37	1036
IPI00469755	IPI00469755;IPI00658339;IPI00776310	Periodic tryptophan protein 2 homolog	Pwp2;Pwp2h	Periodic tryptophan protein 2 homolog	3	3	2	-1.6774	0.0202435	-1.53954	-1.92565	-1.74826	-1.60654	21	15	Q8BU03;A1A596;Q2M1K2;Q8K2C4;Q8R538	PWP2_MOUSE	ENSMUST00000042556		MGI:1341200	NP_083822	PF04047;PF00400	PWP2;WD40	Periodic tryptophan protein 2 WD repeat associated presumed domain;WD domain, G-beta repeat	GO:0005730;GO:0043226;GO:0043228;GO:0043229;GO:0043232;GO:0044422;GO:0044424;GO:0044428;GO:0044446;GO:0044464	nucleolus;organelle;non-membrane-bounded organelle;intracellular organelle;intracellular non-membrane-bounded organelle;organelle part;intracellular part;nuclear part;intracellular organelle part;cell part	GO:0003824;GO:0004175;GO:0004252;GO:0008233;GO:0008236;GO:0016787;GO:0017171;GO:0070011	catalytic activity;endopeptidase activity;serine-type endopeptidase activity;peptidase activity;serine-type peptidase activity;hydrolase activity;serine hydrolase activity;peptidase activity, acting on L-amino acid peptides	GO:0006508;GO:0008152;GO:0009056;GO:0009057;GO:0019538;GO:0030163;GO:0043170;GO:0043283;GO:0043285;GO:0044238	proteolysis;metabolic process;catabolic process;macromolecule catabolic process;protein metabolic process;protein catabolic process;macromolecule metabolic process;biopolymer metabolic process;biopolymer catabolic process;primary metabolic process	mmu:110816				102.91	919
IPI00468437	IPI00468437;IPI00761811;IPI00469196;IPI00656179	Ribosome biogenesis protein NSA2 homolog;TGF-beta-inducible nuclear protein 1;L-name-related protein 42	Tinp1	Ribosome biogenesis protein NSA2 homolog;hypothetical protein isoform 1	3	2	2	-1.67074	0.020649	-1.30603	-1.91582	-1.42566	-2.26336	45	33	Q9CR47;Q5M9P2	NSA2_MOUSE	ENSMUST00000073456		MGI:1913883	NP_067527;XP_001479584;XP_920204;XP_484785	PF01201	Ribosomal_S8e	Ribosomal protein S8e	GO:0005730;GO:0030529;GO:0032991;GO:0043226;GO:0043228;GO:0043229;GO:0043232;GO:0044422;GO:0044424;GO:0044428;GO:0044446;GO:0044464	nucleolus;ribonucleoprotein complex;macromolecular complex;organelle;non-membrane-bounded organelle;intracellular organelle;intracellular non-membrane-bounded organelle;organelle part;intracellular part;nuclear part;intracellular organelle part;cell part			GO:0006139;GO:0006364;GO:0006396;GO:0006807;GO:0008152;GO:0009987;GO:0016070;GO:0016072;GO:0034470;GO:0034660;GO:0034960;GO:0043170;GO:0043283;GO:0044237;GO:0044238;GO:0044260	nucleobase, nucleoside, nucleotide and nucleic acid metabolic process;rRNA processing;RNA processing;nitrogen compound metabolic process;metabolic process;cellular process;RNA metabolic process;rRNA metabolic process;ncRNA processing	mmu:433230;mmu:59050;mmu:636306				30.036	260
IPI00626132	IPI00626132;IPI00830581;IPI00320847	Hydroxysteroid (17-beta) dehydrogenase 10;17beta-hydroxysteroid dehydrogenase type 10/short chain L-3-hydroxyacyl-CoA dehydrogenase;Putative uncharacterized protein;3-hydroxyacyl-CoA dehydrogenase type-2;3-hydroxyacyl-CoA dehydrogenase type II;Type II HADH;3-hydroxy-2-methylbutyryl-CoA dehydrogenase;17-beta-hydroxysteroid dehydrogenase 10;Mitochondrial ribonuclease P protein 2;Endoplasmic reticul…	Hsd17b10;RP23-419G22.2-003;Hadh2;Hsd17b10/Schad;RP23-419G22.2-001;Erab	Hydroxysteroid (17-beta) dehydrogenase 10;hydroxyacyl-Coenzyme A dehydrogenase type II;3-hydroxyacyl-CoA dehydrogenase type-2	10	9	9	-1.66998	0.020696	-1.54913	-2.23566	-1.41968	-1.79083	84	51	A2AFQ2;Q9CYT3;Q99N15;O08756	A2AFQ2_MOUSE;Q99N15_MOUSE;HCD2_MOUSE	ENSMUST00000112617;ENSMUST00000026289	OTTMUSP00000021232;OTTMUSP00000021231	MGI:1333871;MGI:1333871;MGI:1333871	NP_058043	PF00106	adh_short	short chain dehydrogenase	GO:0005743;GO:0005783;GO:0016020;GO:0019866;GO:0031090;GO:0031966;GO:0043226;GO:0043227;GO:0043229;GO:0043231;GO:0044422;GO:0044424;GO:0044429;GO:0044444;GO:0044446;GO:0044464	mitochondrial inner membrane;endoplasmic reticulum;membrane;organelle inner membrane;organelle membrane;mitochondrial membrane;organelle;membrane-bounded organelle;intracellular organelle;intracellular membrane-bounded organelle;organelle part	GO:0003824;GO:0005488;GO:0016491;GO:0003857;GO:0016614;GO:0016616;GO:0047015	catalytic activity;binding;oxidoreductase activity;3-hydroxyacyl-CoA dehydrogenase activity;oxidoreductase activity, acting on CH-OH group of donors;oxidoreductase activity, acting on the CH-OH group of donors, NAD or NADP as acceptor	GO:0008152;GO:0006139;GO:0006396;GO:0006399;GO:0006807;GO:0008033;GO:0009987;GO:0016070;GO:0034470;GO:0034660;GO:0034960;GO:0043170;GO:0043283;GO:0044237;GO:0044238;GO:0044260;GO:0055114	metabolic process;nucleobase, nucleoside, nucleotide and nucleic acid metabolic process;RNA processing;tRNA metabolic process;nitrogen compound metabolic process;tRNA processing;cellular process;RNA metabolic process;ncRNA processing	mmu:15108	ko00280;ko05010	Valine, leucine and isoleucine degradation;Alzheimer's disease	K08683	28.374	271
IPI00132388	IPI00132388	Basic leucine zipper and W2 domain-containing protein 1	Bzw1	Basic leucine zipper and W2 domain-containing protein 1	7	6	7	-1.66502	0.0210027	-1.36974	-1.70027	-1.63266	-1.69739	72	45	Q9CQC6;Q9CVI6	BZW1_MOUSE	ENSMUST00000050552		MGI:1914132	NP_080100	PF02020	W2	eIF4-gamma/eIF5/eIF2-epsilon			GO:0005488	binding	GO:0006139;GO:0006350;GO:0006355;GO:0006807;GO:0008152;GO:0009058;GO:0009059;GO:0009889;GO:0009987;GO:0010468;GO:0010556;GO:0019219;GO:0019222;GO:0031323;GO:0031326;GO:0034645;GO:0034960;GO:0034961;GO:0043170;GO:0043283;GO:0043284;GO:0044237;GO:0044238;GO:0044249;GO:0044260;GO:0045449;GO:0050789;GO:0050794;GO:0051171;GO:0051252;GO:0060255;GO:0065007;GO:0080090	nucleobase, nucleoside, nucleotide and nucleic acid metabolic process;transcription;regulation of transcription, DNA-dependent;nitrogen compound metabolic process;metabolic process;biosynthetic process;macromolecule biosynthetic process	mmu:66882				48.043	419
IPI00461964	IPI00461964	Methylmalonate-semialdehyde dehydrogenase [acylating], mitochondrial;Aldehyde dehydrogenase family 6 member A1	Aldh6a1	Methylmalonate-semialdehyde dehydrogenase [acylating], mitochondrial	6	6	5	-1.66344	0.0211012	-1.68544	-2.31493	-1.31864	-1.64144	270	213	Q9EQ20;Q1LZK2;Q8K0L1	MMSA_MOUSE	ENSMUST00000085192		MGI:1915077	NP_598803	PF00171	Aldedh	Aldehyde dehydrogenase family	GO:0005739;GO:0043226;GO:0043227;GO:0043229;GO:0043231;GO:0044424;GO:0044444;GO:0044464	mitochondrion;organelle;membrane-bounded organelle;intracellular organelle;intracellular membrane-bounded organelle;intracellular part;cytoplasmic part;cell part	GO:0003824;GO:0004491;GO:0016491;GO:0016620;GO:0016903;GO:0018478	catalytic activity;methylmalonate-semialdehyde dehydrogenase (acylating) activity;oxidoreductase activity;oxidoreductase activity, acting on the aldehyde or oxo group of donors, NAD or NADP as acceptor	GO:0008152;GO:0009987;GO:0030154;GO:0032502;GO:0045444;GO:0048869;GO:0050873;GO:0055114	metabolic process;cellular process;cell differentiation;developmental process;fat cell differentiation;cellular developmental process;brown fat cell differentiation;oxidation reduction	mmu:104776	ko00640;ko00562;ko00280	Propanoate metabolism;Inositol phosphate metabolism;Valine, leucine and isoleucine degradation	K00140	57.915	535
IPI00134585	IPI00134585	Glutamyl aminopeptidase;EAP;Aminopeptidase A;BP-1/6C3 antigen	Enpep	Glutamyl aminopeptidase	2	2	2	-1.66311	0.0211219	-2.15743	1.00808	-1.1688	-2.46425	117	138	P16406;Q52JJ6;Q6P3C1;Q8CD51	AMPE_MOUSE	ENSMUST00000029658		MGI:106645	NP_031960	PF01433	Peptidase_M1	Peptidase family M1	GO:0005903;GO:0009897;GO:0016021;GO:0016324;GO:0031224;GO:0031410;GO:0031982;GO:0042995;GO:0043226;GO:0043229;GO:0044424;GO:0044425;GO:0044444;GO:0044459;GO:0044464	brush border;external side of plasma membrane;integral to membrane;apical plasma membrane;intrinsic to membrane;cytoplasmic vesicle;vesicle;cell projection;organelle;intracellular organelle;intracellular part;membrane part;cytoplasmic part	GO:0003824;GO:0004177;GO:0005488;GO:0005509;GO:0008233;GO:0008237;GO:0008238;GO:0008270;GO:0016787;GO:0043167;GO:0043169;GO:0046872;GO:0046914;GO:0070011	catalytic activity;aminopeptidase activity;binding;calcium ion binding;peptidase activity;metallopeptidase activity;exopeptidase activity;zinc ion binding;hydrolase activity;ion binding;cation binding;metal ion binding;transition metal ion binding	GO:0001525;GO:0006508;GO:0008152;GO:0009056;GO:0009057;GO:0010926;GO:0019538;GO:0030163;GO:0032502;GO:0043170;GO:0043283;GO:0043285;GO:0044238;GO:0048646	angiogenesis;proteolysis;metabolic process;catabolic process;macromolecule catabolic process;anatomical structure formation;protein metabolic process;protein catabolic process;developmental process;macromolecule metabolic process	mmu:13809	ko04614	Renin-angiotensin system	K11141	107.96	945
IPI00131424	IPI00131424;IPI00881401;IPI00648887;IPI00649159;IPI00649655	Carnitine O-palmitoyltransferase 2, mitochondrial;Carnitine palmitoyltransferase II;Carnitine palmitoyltransferase 2;Putative uncharacterized protein	Cpt2;Cpt-2;RP23-40G2.4-001;mCG_17985;RP23-40G2.4-002;RP23-40G2.4-003	Carnitine O-palmitoyltransferase 2, mitochondrial;carnitine O-palmitoyltransferase precursor;Carnitine palmitoyltransferase 2;Carnitine palmitoyltransferase 2	5	4	2	-1.66259	0.0211549	-1.12128	-2.05365	-1.27152	-2.56525	591	598	P52825;Q3TFS0;Q3UDA8;Q3UN55;Q9CU20;A2A8E9;A2A8E7	CPT2_MOUSE;Q3TFS0_MOUSE;A2A8E9_MOUSE;A2A8E7_MOUSE	ENSMUST00000030345;ENSMUST00000106721;ENSMUST00000106720	OTTMUSP00000009669;OTTMUSP00000009670;OTTMUSP00000009691	MGI:109176;MGI:109176;MGI:109176;MGI:109176	NP_034079	PF00755	Carn_acyltransf	Choline/Carnitine o-acyltransferase	GO:0005743;GO:0016020;GO:0019866;GO:0031090;GO:0031966;GO:0044422;GO:0044424;GO:0044429;GO:0044444;GO:0044446;GO:0044464;GO:0005739;GO:0043226;GO:0043227;GO:0043229;GO:0043231	mitochondrial inner membrane;membrane;organelle inner membrane;organelle membrane;mitochondrial membrane;organelle part;intracellular part;mitochondrial part;cytoplasmic part;intracellular organelle part;cell part;mitochondrion;organelle	GO:0003824;GO:0004095;GO:0008374;GO:0008415;GO:0016406;GO:0016409;GO:0016416;GO:0016740;GO:0016746;GO:0016747	catalytic activity;carnitine O-palmitoyltransferase activity;O-acyltransferase activity;acyltransferase activity;carnitine O-acyltransferase activity;palmitoyltransferase activity;O-palmitoyltransferase activity;transferase activity	GO:0006082;GO:0006629;GO:0006631;GO:0006810;GO:0008152;GO:0009987;GO:0019752;GO:0032787;GO:0042180;GO:0043436;GO:0044237;GO:0044238;GO:0044255;GO:0051234	organic acid metabolic process;lipid metabolic process;fatty acid metabolic process;transport;metabolic process;cellular process;carboxylic acid metabolic process;monocarboxylic acid metabolic process;cellular ketone metabolic process	mmu:12896	ko00071;ko03320	Fatty acid metabolism;PPAR signaling pathway	K08766	73.927	658
IPI00315302	IPI00315302	NADH dehydrogenase [ubiquinone] 1 alpha subcomplex subunit 2;NADH-ubiquinone oxidoreductase B8 subunit;Complex I-B8	Ndufa2	NADH dehydrogenase [ubiquinone] 1 alpha subcomplex subunit 2	2	2	1	-1.6556	0.0215967	-1.51859	-1.66943	-1.67402	-1.64177	18	3	Q9CQ75	NDUA2_MOUSE	ENSMUST00000014438		MGI:1343103	NP_035015	PF05047	L51_S25_CI-B8	Mitochondrial ribosomal protein L51 / S25 / CI-B8 domain	GO:0005747;GO:0030964;GO:0032991;GO:0043234;GO:0044422;GO:0044424;GO:0044425;GO:0044429;GO:0044444;GO:0044446;GO:0044455;GO:0044464;GO:0045271	mitochondrial respiratory chain complex I;NADH dehydrogenase complex;macromolecular complex;protein complex;organelle part;intracellular part;membrane part;mitochondrial part;cytoplasmic part;intracellular organelle part;mitochondrial membrane part	GO:0003824;GO:0003954;GO:0008137;GO:0016491;GO:0016651;GO:0016655;GO:0050136	catalytic activity;NADH dehydrogenase activity;NADH dehydrogenase (ubiquinone) activity;oxidoreductase activity;oxidoreductase activity, acting on NADH or NADPH;oxidoreductase activity, acting on NADH or NADPH, quinone or similar compound as acceptor	GO:0006091;GO:0006810;GO:0008152;GO:0009987;GO:0022900;GO:0044237;GO:0051234;GO:0055114	generation of precursor metabolites and energy;transport;metabolic process;cellular process;electron transport chain;cellular metabolic process;establishment of localization;oxidation reduction	mmu:17991	ko00190;ko05010;ko05012;ko05016	Oxidative phosphorylation;Alzheimer's disease;Parkinson's disease;Huntington's disease	K03946	10.916	99
IPI00125460	IPI00125460;IPI00856424	ATP synthase-coupling factor 6, mitochondrial;ATP synthase coupling factor VI	Atp5j	ATP synthase-coupling factor 6, mitochondrial;ATP synthase coupling factor VI	6	6	5	-1.6463	0.0221969	-1.00978	-2.28281	-0.884823	-2.84462	54	33	P97450;Q812D0	ATP5J_MOUSE;Q812D0_MOUSE	ENSMUST00000023608;ENSMUST00000114191;ENSMUST00000114193	OTTMUSP00000030445;OTTMUSP00000030446;OTTMUSP00000030603;OTTMUSP00000030604	MGI:107777;MGI:107777	NP_058035;XP_980826	PF05511	ATP-synt_F6	Mitochondrial ATP synthase coupling factor 6	GO:0000276;GO:0032991;GO:0033177;GO:0043234;GO:0044422;GO:0044424;GO:0044425;GO:0044429;GO:0044444;GO:0044446;GO:0044455;GO:0044464;GO:0045263	mitochondrial proton-transporting ATP synthase complex, coupling factor F(o);macromolecular complex;proton-transporting two-sector ATPase complex, proton-transporting domain;protein complex;organelle part;intracellular part;membrane part	GO:0005215;GO:0008324;GO:0015075;GO:0015077;GO:0015078;GO:0022857;GO:0022890;GO:0022891;GO:0022892	transporter activity;cation transmembrane transporter activity;ion transmembrane transporter activity;monovalent inorganic cation transmembrane transporter activity;hydrogen ion transmembrane transporter activity;transmembrane transporter activity	GO:0006139;GO:0006163;GO:0006164;GO:0006753;GO:0006754;GO:0006807;GO:0006810;GO:0006811;GO:0006812;GO:0006818;GO:0008152;GO:0009058;GO:0009117;GO:0009141;GO:0009142;GO:0009144;GO:0009145;GO:0009150;GO:0009152;GO:0009165;GO:0009199;GO:0009201;GO:0009205;GO:0009206;GO:0009259;GO:0009260;GO:0009987;GO:0015672;GO:0015985;GO:0015986;GO:0015992;GO:0034220;GO:0044237;GO:0044238;GO:0044249;GO:0046034;GO:…	nucleobase, nucleoside, nucleotide and nucleic acid metabolic process;purine nucleotide metabolic process;purine nucleotide biosynthetic process;nucleoside phosphate metabolic process;ATP biosynthetic process;nitrogen compound metabolic process;transport	mmu:11957;mmu:674583	ko00190;ko05010;ko05012;ko05016	Oxidative phosphorylation;Alzheimer's disease;Parkinson's disease;Huntington's disease	K02131	12.496	108
IPI00116154	IPI00116154;IPI00785410	Cytochrome c oxidase, subunit Vb;Putative uncharacterized protein;MCG17741, isoform CRA_d;MCG23026;Novel protein similar to cytochrome c oxidase, subunit Vb (Cox5b);Cytochrome c oxidase subunit 5B, mitochondrial;Cytochrome c oxidase polypeptide Vb	Cox5b;RP23-298F22.4-001;mCG_17741;mCG_23026	cytochrome c oxidase, subunit Vb;Cytochrome c oxidase subunit 5B, mitochondrial	2	2	2	-1.64353	0.0223779	-1.18907	-2.1494	-1.45629	-1.83078	30	36	Q9D881;P19536	Q9D881_MOUSE;COX5B_MOUSE	ENSMUST00000044043;ENSMUST00000081180	OTTMUSP00000000452	MGI:88475;MGI:88475	NP_034072;XP_001474638;XP_001475467	PF01215	COX5B	Cytochrome c oxidase subunit Vb	GO:0005743;GO:0016020;GO:0019866;GO:0031090;GO:0031966;GO:0044422;GO:0044424;GO:0044429;GO:0044444;GO:0044446;GO:0044464	mitochondrial inner membrane;membrane;organelle inner membrane;organelle membrane;mitochondrial membrane;organelle part;intracellular part;mitochondrial part;cytoplasmic part;intracellular organelle part;cell part	GO:0003824;GO:0004129;GO:0005215;GO:0008324;GO:0015002;GO:0015075;GO:0015077;GO:0015078;GO:0016491;GO:0016675;GO:0016676;GO:0022857;GO:0022890;GO:0022891;GO:0022892;GO:0005488;GO:0008270;GO:0043167;GO:0043169;GO:0046872;GO:0046914	catalytic activity;cytochrome-c oxidase activity;transporter activity;cation transmembrane transporter activity;heme-copper terminal oxidase activity;ion transmembrane transporter activity;monovalent inorganic cation transmembrane transporter activity			mmu:100040340;mmu:100045602;mmu:100046079;mmu:12859	ko00190;ko04260;ko05010;ko05012;ko05016	Oxidative phosphorylation;Cardiac muscle contraction;Alzheimer's disease;Parkinson's disease;Huntington's disease	K02265	13.847	129
IPI00263879	IPI00263879;IPI00625702	60S ribosomal protein L35	Rpl35	60S ribosomal protein L35;similar to ribosomal protein L35	6	6	5	-1.63698	0.0228124	-1.80148	-1.54088	-1.54676	-1.72719	12	12	Q6ZWV7	RL35_MOUSE	ENSMUST00000080861;ENSMUST00000102782	OTTMUSP00000013245	MGI:1913739	NP_079868;XP_001472032;XP_001472447;XP_001475518	PF00831	Ribosomal_L29	Ribosomal L29 protein	GO:0005840;GO:0030529;GO:0032991;GO:0043226;GO:0043228;GO:0043229;GO:0043232;GO:0044424;GO:0044444;GO:0044464	ribosome;ribonucleoprotein complex;macromolecular complex;organelle;non-membrane-bounded organelle;intracellular organelle;intracellular non-membrane-bounded organelle;intracellular part;cytoplasmic part;cell part	GO:0003735;GO:0005198	structural constituent of ribosome;structural molecule activity	GO:0006412;GO:0008152;GO:0009058;GO:0009059;GO:0009987;GO:0019538;GO:0034645;GO:0034960;GO:0034961;GO:0043170;GO:0043283;GO:0043284;GO:0044237;GO:0044238;GO:0044249;GO:0044260;GO:0044267	translation;metabolic process;biosynthetic process;macromolecule biosynthetic process;cellular process;protein metabolic process;cellular macromolecule biosynthetic process;cellular biopolymer metabolic process;cellular biopolymer biosynthetic process	mmu:100038991;mmu:66489	ko03010	Ribosome	K02918	14.552	123
IPI00128345	IPI00128345;IPI00673568;IPI00674389;IPI00886222	NADH dehydrogenase [ubiquinone] iron-sulfur protein 6, mitochondrial;NADH-ubiquinone oxidoreductase 13 kDa-A subunit;Complex I-13kD-A	Ndufs6;Ip13	NADH dehydrogenase [ubiquinone] iron-sulfur protein 6, mitochondrial;similar to NADH dehydrogenase (ubiquinone) Fe-S protein 6;similar to NADH dehydrogenase (ubiquinone) Fe-S protein 6;11 kDa protein	4	4	3	-1.63639	0.0228517	-1.38401	-1.83722	-1.43556	-2.30608	234	165	P52503	NDUS6_MOUSE	ENSMUST00000022097	OTTMUSP00000039679;OTTMUSP00000039681	MGI:107932	NP_035018;XP_894909;XP_909811	PF10276	zf-CHCC	Zinc-finger domain	GO:0005743;GO:0016020;GO:0019866;GO:0031090;GO:0031966;GO:0044422;GO:0044424;GO:0044425;GO:0044429;GO:0044444;GO:0044446;GO:0044464;GO:0070469	mitochondrial inner membrane;membrane;organelle inner membrane;organelle membrane;mitochondrial membrane;organelle part;intracellular part;membrane part;mitochondrial part;cytoplasmic part;intracellular organelle part;cell part;respiratory chain			GO:0006091;GO:0006810;GO:0008152;GO:0009987;GO:0022900;GO:0044237;GO:0051234;GO:0055114	generation of precursor metabolites and energy;transport;metabolic process;cellular process;electron transport chain;cellular metabolic process;establishment of localization;oxidation reduction	mmu:407785	ko00190;ko05010;ko05012;ko05016	Oxidative phosphorylation;Alzheimer's disease;Parkinson's disease;Huntington's disease	K03939	13.02	116
IPI00131814	IPI00131814;IPI00649940	Aromatic-L-amino-acid decarboxylase;DOPA decarboxylase	Ddc	Aromatic-L-amino-acid decarboxylase	23	23	20	-1.63027	0.0232639	-1.55323	-1.70732	-1.3741	-1.88922	591	598	O88533;Q5SUV8	DDC_MOUSE	ENSMUST00000066237;ENSMUST00000109659	OTTMUSP00000005369	MGI:94876	NP_057881	PF00282	Pyridoxal_deC	Pyridoxal-dependent decarboxylase conserved domain			GO:0003824;GO:0004058;GO:0005488;GO:0005496;GO:0008289;GO:0016829;GO:0016830;GO:0016831;GO:0019842;GO:0030170;GO:0048037;GO:0070279	catalytic activity;aromatic-L-amino-acid decarboxylase activity;binding;steroid binding;lipid binding;lyase activity;carbon-carbon lyase activity;carboxy-lyase activity;vitamin binding;pyridoxal phosphate binding;cofactor binding;vitamin B6 binding	GO:0006066;GO:0006082;GO:0006519;GO:0006575;GO:0006576;GO:0006584;GO:0006725;GO:0006807;GO:0008152;GO:0009058;GO:0009308;GO:0009309;GO:0009636;GO:0009712;GO:0009987;GO:0018958;GO:0019752;GO:0034311;GO:0034641;GO:0042180;GO:0042221;GO:0042398;GO:0042401;GO:0042423;GO:0043436;GO:0044237;GO:0044238;GO:0044249;GO:0044271;GO:0050896	alcohol metabolic process;organic acid metabolic process;cellular amino acid and derivative metabolic process;cellular amino acid derivative metabolic process;biogenic amine metabolic process;catecholamine metabolic process	mmu:13195	ko00340;ko00350;ko00360;ko00380;ko00901;ko00950	Histidine metabolism;Tyrosine metabolism;Phenylalanine metabolism;Tryptophan metabolism;Indole and ipecac alkaloid biosynthesis;Alkaloid biosynthesis I	K01593	53.873	480
IPI00420706	IPI00420706;IPI00875457	Leucine-rich PPR motif-containing protein, mitochondrial;130 kDa leucine-rich protein;LRP 130;mLRP130	Lrpprc;Lrp130	Leucine-rich PPR motif-containing protein, mitochondrial;147 kDa protein	27	22	23	-1.63001	0.0232818	-1.63411	-2.13439	-1.62591	-1.48417	39	15	Q6PB66	LPPRC_MOUSE	ENSMUST00000112308	OTTMUSP00000040245	MGI:1919666	NP_082509	PF01535	PPR	PPR repeat	GO:0000228;GO:0000793;GO:0000794;GO:0005637;GO:0005640;GO:0005654;GO:0005694;GO:0005739;GO:0005856;GO:0016020;GO:0019866;GO:0019867;GO:0031090;GO:0031965;GO:0031968;GO:0043226;GO:0043227;GO:0043228;GO:0043229;GO:0043231;GO:0043232;GO:0044422;GO:0044424;GO:0044425;GO:0044428;GO:0044444;GO:0044446;GO:0044464;GO:0048471	nuclear chromosome;condensed chromosome;condensed nuclear chromosome;nuclear inner membrane;nuclear outer membrane;nucleoplasm;chromosome;mitochondrion;cytoskeleton;membrane;organelle inner membrane;outer membrane;organelle membrane;nuclear membrane	GO:0003676;GO:0003677;GO:0003697;GO:0003723;GO:0005488;GO:0005515;GO:0008092;GO:0015631;GO:0043566;GO:0048487	nucleic acid binding;DNA binding;single-stranded DNA binding;RNA binding;binding;protein binding;cytoskeletal protein binding;tubulin binding;structure-specific DNA binding;beta-tubulin binding	GO:0006139;GO:0006350;GO:0006355;GO:0006807;GO:0006810;GO:0008152;GO:0009058;GO:0009059;GO:0009889;GO:0009987;GO:0010468;GO:0010556;GO:0015931;GO:0019219;GO:0019222;GO:0031323;GO:0031326;GO:0034645;GO:0034960;GO:0034961;GO:0043170;GO:0043283;GO:0043284;GO:0044237;GO:0044238;GO:0044249;GO:0044260;GO:0045449;GO:0050657;GO:0050658;GO:0050789;GO:0050794;GO:0051028;GO:0051171;GO:0051234;GO:0051236;GO:…	nucleobase, nucleoside, nucleotide and nucleic acid metabolic process;transcription;regulation of transcription, DNA-dependent;nitrogen compound metabolic process;transport;metabolic process;biosynthetic process;macromolecule biosynthetic process	mmu:72416				156.61	1392
IPI00894870	IPI00894870;IPI00850580	tRNA (cytosine-5-)-methyltransferase NSUN2;NOL1/NOP2/Sun domain family member 2;Myc-induced SUN domain-containing protein	Nsun2;D13Wsu123e;Misu	Isoform 1 of tRNA (cytosine-5-)-methyltransferase NSUN2;Isoform 2 of tRNA (cytosine-5-)-methyltransferase NSUN2	21	20	18	-1.62844	0.0233886	-1.68519	-1.57169	-1.82471	-1.52931	25	3	Q1HFZ0-1;Q1HFZ0;Q1HFZ0-2	NSUN2_MOUSE	ENSMUST00000022087;ENSMUST00000109699	OTTMUSP00000043252;OTTMUSP00000043253	MGI:107252;MGI:107252	NP_663329	PF01189	Nol1_Nop2_Fmu	NOL1/NOP2/sun family	GO:0005730;GO:0005737;GO:0043226;GO:0043228;GO:0043229;GO:0043232;GO:0044422;GO:0044424;GO:0044428;GO:0044446;GO:0044464	nucleolus;cytoplasm;organelle;non-membrane-bounded organelle;intracellular organelle;intracellular non-membrane-bounded organelle;organelle part;intracellular part;nuclear part;intracellular organelle part;cell part	GO:0000049;GO:0003676;GO:0003723;GO:0003824;GO:0005488;GO:0008168;GO:0008173;GO:0008175;GO:0008757;GO:0016427;GO:0016428;GO:0016740;GO:0016741	tRNA binding;nucleic acid binding;RNA binding;catalytic activity;binding;methyltransferase activity;RNA methyltransferase activity;tRNA methyltransferase activity;S-adenosylmethionine-dependent methyltransferase activity	GO:0006139;GO:0006396;GO:0006399;GO:0006807;GO:0008033;GO:0008152;GO:0009987;GO:0016070;GO:0034470;GO:0034660;GO:0034960;GO:0043170;GO:0043283;GO:0044237;GO:0044238;GO:0044260	nucleobase, nucleoside, nucleotide and nucleic acid metabolic process;RNA processing;tRNA metabolic process;nitrogen compound metabolic process;tRNA processing;metabolic process;cellular process;RNA metabolic process;ncRNA processing	mmu:28114				85.451	757
IPI00225961	IPI00225961;IPI00885925;IPI00459364	D-3-phosphoglycerate dehydrogenase;A10	Phgdh	D-3-phosphoglycerate dehydrogenase	27	26	21	-1.61879	0.0240551	-1.86849	-1.2352	-2.16054	-1.36909	6	6	Q61753	SERA_MOUSE	ENSMUST00000065793	OTTMUSP00000032394	MGI:1355330	NP_058662	PF00389;PF02826	2-Hacid_dh;2-Hacid_dh_C	D-isomer specific 2-hydroxyacid dehydrogenase, catalytic domain;D-isomer specific 2-hydroxyacid dehydrogenase, NAD binding domain			GO:0000166;GO:0003824;GO:0004617;GO:0005488;GO:0016491;GO:0016614;GO:0016616;GO:0048037;GO:0050662;GO:0051287	nucleotide binding;catalytic activity;phosphoglycerate dehydrogenase activity;binding;oxidoreductase activity;oxidoreductase activity, acting on CH-OH group of donors;oxidoreductase activity, acting on the CH-OH group of donors, NAD or NADP as acceptor	GO:0006082;GO:0006519;GO:0006520;GO:0006541;GO:0006544;GO:0006563;GO:0006564;GO:0006566;GO:0006575;GO:0006629;GO:0006631;GO:0006790;GO:0006807;GO:0008152;GO:0008652;GO:0009058;GO:0009064;GO:0009066;GO:0009069;GO:0009070;GO:0009308;GO:0009309;GO:0009448;GO:0009987;GO:0010468;GO:0016043;GO:0016053;GO:0019222;GO:0019530;GO:0019605;GO:0019752;GO:0021510;GO:0021782;GO:0021915;GO:0022402;GO:0030030;GO:…	organic acid metabolic process;cellular amino acid and derivative metabolic process;cellular amino acid metabolic process;glutamine metabolic process;glycine metabolic process;L-serine metabolic process;L-serine biosynthetic process	mmu:236539	ko00260	Glycine, serine and threonine metabolism	K00058	56.585	533
IPI00111829	IPI00111829;IPI00649823	Probable rRNA-processing protein EBP2;EBNA1 binding protein 2	Ebna1bp2;Ebp2;RP23-154A15.1-004	Probable rRNA-processing protein EBP2;EBNA1 binding protein 2	7	6	5	-1.61525	0.0243035	-1.53405	-1.75755	-1.39043	-1.69644	294	138	Q9D903;A2ACZ1	EBP2_MOUSE;A2ACZ1_MOUSE	ENSMUST00000030501;ENSMUST00000106362	OTTMUSP00000009114;OTTMUSP00000009115	MGI:1916322;MGI:1916322	NP_081208	PF05890	Ebp2	Eukaryotic rRNA processing protein EBP2	GO:0005730;GO:0043226;GO:0043228;GO:0043229;GO:0043232;GO:0044422;GO:0044424;GO:0044428;GO:0044446;GO:0044464	nucleolus;organelle;non-membrane-bounded organelle;intracellular organelle;intracellular non-membrane-bounded organelle;organelle part;intracellular part;nuclear part;intracellular organelle part;cell part	GO:0005488;GO:0005515	binding;protein binding	GO:0006139;GO:0006364;GO:0006396;GO:0006807;GO:0007059;GO:0008152;GO:0009987;GO:0016070;GO:0016072;GO:0034470;GO:0034660;GO:0034960;GO:0043170;GO:0043283;GO:0044237;GO:0044238;GO:0044260	nucleobase, nucleoside, nucleotide and nucleic acid metabolic process;rRNA processing;RNA processing;nitrogen compound metabolic process;chromosome segregation;metabolic process;cellular process;RNA metabolic process;rRNA metabolic process	mmu:69072				34.702	306
IPI00230145	IPI00230145	Ferritin heavy chain	Fth1;Fth	Ferritin heavy chain	4	3	3	-1.61482	0.0243333	-1.27533	-1.95431	-0.86788	-2.59035	45	36	P09528	FRIH_MOUSE	ENSMUST00000025563		MGI:95588	NP_034369	PF00210	Ferritin	Ferritin-like domain			GO:0003824;GO:0004322;GO:0005488;GO:0005506;GO:0008199;GO:0016491;GO:0016722;GO:0016724;GO:0043167;GO:0043169;GO:0046872;GO:0046914	catalytic activity;ferroxidase activity;binding;iron ion binding;ferric iron binding;oxidoreductase activity;oxidoreductase activity, oxidizing metal ions;oxidoreductase activity, oxidizing metal ions, oxygen as acceptor;ion binding;cation binding	GO:0000041;GO:0002376;GO:0006810;GO:0006811;GO:0006812;GO:0006826;GO:0006873;GO:0006879;GO:0006955;GO:0008152;GO:0008285;GO:0009987;GO:0015674;GO:0019725;GO:0030001;GO:0030003;GO:0030005;GO:0042127;GO:0042592;GO:0048519;GO:0048523;GO:0048878;GO:0050789;GO:0050794;GO:0050801;GO:0050896;GO:0051234;GO:0055066;GO:0055072;GO:0055080;GO:0055082;GO:0055114;GO:0065007;GO:0065008	transition metal ion transport;immune system process;transport;ion transport;cation transport;iron ion transport;cellular ion homeostasis;cellular iron ion homeostasis;immune response;metabolic process;negative regulation of cell proliferation	mmu:14319	ko00860	Porphyrin and chlorophyll metabolism	K00522	21.066	182
IPI00120984	IPI00120984	NADH dehydrogenase [ubiquinone] 1 alpha subcomplex subunit 8;NADH-ubiquinone oxidoreductase 19 kDa subunit;Complex I-19kD;Complex I-PGIV	Ndufa8	NADH dehydrogenase [ubiquinone] 1 alpha subcomplex subunit 8	6	6	6	-1.6106	0.0246324	-1.44157	-1.67419	-1.54702	-2.04532	9	9	Q9DCJ5	NDUA8_MOUSE	ENSMUST00000070112	OTTMUSP00000013028	MGI:1915625	NP_080979	PF06747	CHCH	CHCH domain	GO:0005743;GO:0016020;GO:0019866;GO:0031090;GO:0031966;GO:0044422;GO:0044424;GO:0044425;GO:0044429;GO:0044444;GO:0044446;GO:0044464;GO:0070469	mitochondrial inner membrane;membrane;organelle inner membrane;organelle membrane;mitochondrial membrane;organelle part;intracellular part;membrane part;mitochondrial part;cytoplasmic part;intracellular organelle part;cell part;respiratory chain			GO:0006091;GO:0006810;GO:0008152;GO:0009987;GO:0022900;GO:0044237;GO:0051234;GO:0055114	generation of precursor metabolites and energy;transport;metabolic process;cellular process;electron transport chain;cellular metabolic process;establishment of localization;oxidation reduction	mmu:68375	ko00190;ko05010;ko05012;ko05016	Oxidative phosphorylation;Alzheimer's disease;Parkinson's disease;Huntington's disease	K03952	19.992	172
IPI00408495	IPI00408495;IPI00462199;IPI00113869	Basigin;Basic immunoglobulin superfamily;Membrane glycoprotein gp42;HT7 antigen	Bsg	Isoform 1 of Basigin;Basigin (Fragment);Isoform 2 of Basigin	4	4	2	-1.60547	0.0250003	-1.55594	-1.89996	-1.655	-1.23353	15	24	P18572-1;P18572;O55107;P18572-2;O55108	BASI_MOUSE;O55107_MOUSE	ENSMUST00000067036;ENSMUST00000105381		MGI:88208;MGI:88208;MGI:88208	NP_033898;NP_001070652	PF00047	ig	Immunoglobulin domain	GO:0005886;GO:0016020;GO:0016021;GO:0016023;GO:0031224;GO:0031410;GO:0031982;GO:0031988;GO:0042470;GO:0043226;GO:0043227;GO:0043229;GO:0043231;GO:0044424;GO:0044425;GO:0044444;GO:0044464;GO:0048770	plasma membrane;membrane;integral to membrane;cytoplasmic membrane-bounded vesicle;intrinsic to membrane;cytoplasmic vesicle;vesicle;membrane-bounded vesicle;melanosome;organelle;membrane-bounded organelle;intracellular organelle	GO:0005488;GO:0005529;GO:0005537;GO:0030246;GO:0048029	binding;sugar binding;mannose binding;carbohydrate binding;monosaccharide binding			mmu:12215			K06535	42.444	389
IPI00749646	IPI00749646;IPI00896693;IPI00652416;IPI00652239	DEP domain-containing mTOR-interacting protein;DEP domain-containing protein 6;Depdc6-002	Depdc6;Kiaa4200	Isoform 1 of DEP domain-containing mTOR-interacting protein;Depdc6-002;Isoform 3 of DEP domain-containing mTOR-interacting protein;Isoform 2 of DEP domain-containing mTOR-interacting protein	11	10	9	-1.60055	0.0253574	-1.66216	-1.889	-1.51624	-1.53894	12	6	Q570Y9-1;Q570Y9;B2ZRS3;B2ZRS5;B2ZRS6;Q570Y9-3;Q570Y9-2;B2ZRS7;B2ZRS8	DEPD6_MOUSE;B2ZRS5_MOUSE	ENSMUST00000023056;ENSMUST00000096433;ENSMUST00000100660	OTTMUSP00000029173;OTTMUSP00000029174;OTTMUSP00000029175	MGI:2146322;MGI:2146322;MGI:2146322	NP_663445;NP_001033026	PF00610	DEP	Domain found in Dishevelled, Egl-10, and Pleckstrin	GO:0005622;GO:0044464	intracellular;cell part	GO:0005488;GO:0005515	binding;protein binding	GO:0007154;GO:0007165;GO:0007242;GO:0009987;GO:0050789;GO:0050794;GO:0065007	cell communication;signal transduction;intracellular signaling cascade;cellular process;regulation of biological process;regulation of cellular process;biological regulation	mmu:97998				46.119	409
IPI00128376	IPI00128376	3-alpha-hydroxysteroid dehydrogenase type 1;Aldo-keto reductase family 1, member C14;Putative uncharacterized protein;Aldo-keto reductase family 1, member C14, isoform CRA_b	Akr1c14;mCG_1727	Aldo-keto reductase family 1, member C14, isoform CRA_b	5	3	4	-1.59798	0.0255461	-1.94347	-1.62612	-1.56983	-1.0134	234	165	Q91WT7	Q91WT7_MOUSE	ENSMUST00000041768;ENSMUST00000118717	OTTMUSP00000035115	MGI:2145458	NP_598833	PF00248	Aldo_ket_red	Aldo/keto reductase family			GO:0003824;GO:0016491	catalytic activity;oxidoreductase activity	GO:0008152;GO:0055114	metabolic process;oxidation reduction	mmu:105387				37.188	323
IPI00453777	IPI00453777	ATP synthase subunit delta, mitochondrial;F-ATPase delta subunit	Atp5d	ATP synthase subunit delta, mitochondrial	4	4	3	-1.59151	0.0260246	-1.56333	-2.17776	-1.53688	-1.6197	207	147	Q9D3D9;Q4FK74;Q9D0J2;Q9DCZ0	ATPD_MOUSE	ENSMUST00000003156;ENSMUST00000105367	OTTMUSP00000020609	MGI:1913293	NP_079589	PF00401;PF02823	ATP-synt_DE;ATP-synt_DE_N	ATP synthase, Delta/Epsilon chain, long alpha-helix domain;ATP synthase, Delta/Epsilon chain, beta-sandwich domain	GO:0005743;GO:0016020;GO:0019866;GO:0031090;GO:0031966;GO:0032991;GO:0033178;GO:0043234;GO:0044422;GO:0044424;GO:0044425;GO:0044429;GO:0044444;GO:0044446;GO:0044464;GO:0045261	mitochondrial inner membrane;membrane;organelle inner membrane;organelle membrane;mitochondrial membrane;macromolecular complex;proton-transporting two-sector ATPase complex, catalytic domain;protein complex;organelle part;intracellular part;membrane part	GO:0003824;GO:0005215;GO:0008324;GO:0015075;GO:0015077;GO:0015078;GO:0015399;GO:0015405;GO:0016462;GO:0016787;GO:0016817;GO:0016818;GO:0016820;GO:0016887;GO:0017111;GO:0019829;GO:0022804;GO:0022857;GO:0022890;GO:0022891;GO:0022892;GO:0042623;GO:0042625;GO:0042626;GO:0043492;GO:0046933;GO:0046961	catalytic activity;transporter activity;cation transmembrane transporter activity;ion transmembrane transporter activity;monovalent inorganic cation transmembrane transporter activity;hydrogen ion transmembrane transporter activity	GO:0006139;GO:0006163;GO:0006164;GO:0006753;GO:0006754;GO:0006807;GO:0006810;GO:0006811;GO:0006812;GO:0006818;GO:0008152;GO:0009058;GO:0009117;GO:0009141;GO:0009142;GO:0009144;GO:0009145;GO:0009150;GO:0009152;GO:0009165;GO:0009199;GO:0009201;GO:0009205;GO:0009206;GO:0009259;GO:0009260;GO:0009987;GO:0015672;GO:0015985;GO:0015986;GO:0015992;GO:0034220;GO:0044237;GO:0044238;GO:0044249;GO:0046034;GO:…	nucleobase, nucleoside, nucleotide and nucleic acid metabolic process;purine nucleotide metabolic process;purine nucleotide biosynthetic process;nucleoside phosphate metabolic process;ATP biosynthetic process;nitrogen compound metabolic process;transport	mmu:66043	ko00190;ko05010;ko05012;ko05016	Oxidative phosphorylation;Alzheimer's disease;Parkinson's disease;Huntington's disease	K02134	17.6	168
IPI00127417	IPI00127417;IPI00408489;IPI00379441	Nucleoside diphosphate kinase B;nm23-M2;P18;Down syndrome cell adhesion molecule-like protein	Nme2;Dscaml1	Nucleoside diphosphate kinase B;Down syndrome cell adhesion molecule-like protein (Fragment);similar to nucleoside diphosphate kinase B	8	8	6	-1.58955	0.0261717	-1.8072	-1.37189	-1.94825	-1.30574	3	3	Q01768;B0LAA8;Q5NC82;Q8R4B4	NDKB_MOUSE;Q8R4B4_MOUSE	ENSMUST00000021217;ENSMUST00000072566	OTTMUSP00000001443;OTTMUSP00000001444	MGI:97356;MGI:2150309	NP_001070997;NP_032731;XP_485703;XP_980967	PF00334	NDK	Nucleoside diphosphate kinase	GO:0005739;GO:0005886;GO:0016020;GO:0043226;GO:0043227;GO:0043229;GO:0043231;GO:0044424;GO:0044444;GO:0044464	mitochondrion;plasma membrane;membrane;organelle;membrane-bounded organelle;intracellular organelle;intracellular membrane-bounded organelle;intracellular part;cytoplasmic part;cell part	GO:0000166;GO:0000287;GO:0001882;GO:0001883;GO:0003824;GO:0004550;GO:0005488;GO:0005515;GO:0005524;GO:0016301;GO:0016740;GO:0016772;GO:0016776;GO:0017076;GO:0019205;GO:0030554;GO:0032553;GO:0032555;GO:0032559;GO:0043167;GO:0043169;GO:0046872	nucleotide binding;magnesium ion binding;nucleoside binding;purine nucleoside binding;catalytic activity;nucleoside diphosphate kinase activity;binding;protein binding;ATP binding;kinase activity;transferase activity	GO:0006139;GO:0006163;GO:0006164;GO:0006183;GO:0006213;GO:0006220;GO:0006221;GO:0006228;GO:0006241;GO:0006753;GO:0006807;GO:0008152;GO:0009058;GO:0009116;GO:0009117;GO:0009119;GO:0009141;GO:0009142;GO:0009144;GO:0009145;GO:0009147;GO:0009148;GO:0009150;GO:0009152;GO:0009165;GO:0009199;GO:0009201;GO:0009205;GO:0009206;GO:0009208;GO:0009209;GO:0009218;GO:0009220;GO:0009259;GO:0009260;GO:0009987;GO:…	nucleobase, nucleoside, nucleotide and nucleic acid metabolic process;purine nucleotide metabolic process;purine nucleotide biosynthetic process;GTP biosynthetic process;pyrimidine nucleoside metabolic process;pyrimidine nucleotide metabolic process	mmu:18103	ko00230;ko00240	Purine metabolism;Pyrimidine metabolism	K00940	17.363	152
IPI00857195	IPI00857195;IPI00120245;IPI00752080	Integrin alpha V;Integrin alpha-V;Vitronectin receptor subunit alpha;Integrin alpha-V heavy chain;Integrin alpha-V light chain	Itgav;RP23-111F12.3-001;RP23-111F12.3-005	integrin alpha V precursor;Integrin alpha-V;Integrin alpha V	2	1	2	-1.58684	0.0263753	-1.58516	-1.62091	-1.58851	-1.54377	80	48	A2AKI6;P43406;A2AKI5;Q3U4C8;Q80Y67	A2AKI6_MOUSE;ITAV_MOUSE;A2AKI5_MOUSE	ENSMUST00000028499;ENSMUST00000111740	OTTMUSP00000014341;OTTMUSP00000014342	MGI:96608;MGI:96608;MGI:96608	NP_032428	PF01839;PF00357;PF08441	FG-GAP;Integrin_alpha;Integrin_alpha2	FG-GAP repeat;Integrin alpha cytoplasmic region;Integrin alpha	GO:0008305;GO:0009897;GO:0032991;GO:0043234;GO:0043235;GO:0044425;GO:0044459;GO:0044464;GO:0005737;GO:0005912;GO:0005924;GO:0005925;GO:0030054;GO:0030055;GO:0044424;GO:0070161	integrin complex;external side of plasma membrane;macromolecular complex;protein complex;receptor complex;membrane part;plasma membrane part;cell part;cytoplasm;adherens junction;cell-substrate adherens junction;focal adhesion;cell junction	GO:0004871;GO:0004872;GO:0005488;GO:0005515;GO:0060089;GO:0005509;GO:0043167;GO:0043169;GO:0046872	signal transducer activity;receptor activity;binding;protein binding;molecular transducer activity;calcium ion binding;ion binding;cation binding;metal ion binding	GO:0001568;GO:0001944;GO:0006810;GO:0006897;GO:0006909;GO:0007154;GO:0007155;GO:0007165;GO:0007166;GO:0007229;GO:0009987;GO:0010324;GO:0016043;GO:0016044;GO:0016192;GO:0022610;GO:0032502;GO:0043277;GO:0048513;GO:0048856;GO:0050789;GO:0050794;GO:0051234;GO:0065007;GO:0001525;GO:0010926;GO:0030154;GO:0048646;GO:0048869	blood vessel development;vasculature development;transport;endocytosis;phagocytosis;cell communication;cell adhesion;signal transduction;cell surface receptor linked signal transduction;integrin-mediated signaling pathway;cellular process	mmu:16410	ko04512;ko04514;ko04810;ko04510;ko05200;ko05222	ECM-receptor interaction;Cell adhesion molecules (CAMs);Regulation of actin cytoskeleton;Focal adhesion;Pathways in cancer;Small cell lung cancer	K06487	115.36	1044
IPI00330705	IPI00330705	tRNA (adenine-N(1)-)-methyltransferase catalytic subunit TRMT61A;tRNA(m1A58)-methyltransferase subunit TRMT61A	Trmt61a;Trm61	tRNA (adenine-N(1)-)-methyltransferase catalytic subunit TRMT61A	2	2	1	-1.58309	0.0266593	-1.56778	-1.50819	-1.73672	-1.5984	36	15	Q80XC2	TRM61_MOUSE	ENSMUST00000084947		MGI:2443487	NP_001093262;NP_001093263;NP_796348	PF08704	GCD14	tRNA methyltransferase complex GCD14 subunit	GO:0005634;GO:0043226;GO:0043227;GO:0043229;GO:0043231;GO:0044424;GO:0044464	nucleus;organelle;membrane-bounded organelle;intracellular organelle;intracellular membrane-bounded organelle;intracellular part;cell part	GO:0003824;GO:0008168;GO:0008173;GO:0008175;GO:0008757;GO:0016426;GO:0016429;GO:0016740;GO:0016741	catalytic activity;methyltransferase activity;RNA methyltransferase activity;tRNA methyltransferase activity;S-adenosylmethionine-dependent methyltransferase activity;tRNA (adenine)-methyltransferase activity;tRNA (adenine-N1-)-methyltransferase activity	GO:0001510;GO:0006139;GO:0006396;GO:0006399;GO:0006400;GO:0006730;GO:0006807;GO:0008033;GO:0008152;GO:0009451;GO:0009987;GO:0016070;GO:0030488;GO:0032259;GO:0034470;GO:0034660;GO:0034960;GO:0043170;GO:0043283;GO:0043412;GO:0043414;GO:0044237;GO:0044238;GO:0044260	RNA methylation;nucleobase, nucleoside, nucleotide and nucleic acid metabolic process;RNA processing;tRNA metabolic process;tRNA modification;one-carbon metabolic process;nitrogen compound metabolic process;tRNA processing;metabolic process	mmu:328162			K07442	31.639	290
IPI00134011	IPI00134011	39S ribosomal protein L13, mitochondrial	Mrpl13	39S ribosomal protein L13, mitochondrial	2	1	2	-1.57643	0.0271707	-1.99852	-1.15434	-2.68164	-0.968729	15	6	Q9D1P0;Q05CB9;Q7TMH5	RM13_MOUSE	ENSMUST00000023000		MGI:2137218	NP_081035	PF00572	Ribosomal_L13	Ribosomal protein L13	GO:0000315;GO:0005762;GO:0015934;GO:0030529;GO:0032991;GO:0033279;GO:0044422;GO:0044424;GO:0044429;GO:0044444;GO:0044446;GO:0044464	organellar large ribosomal subunit;mitochondrial large ribosomal subunit;large ribosomal subunit;ribonucleoprotein complex;macromolecular complex;ribosomal subunit;organelle part;intracellular part;mitochondrial part;cytoplasmic part	GO:0003735;GO:0005198	structural constituent of ribosome;structural molecule activity	GO:0006412;GO:0008152;GO:0009058;GO:0009059;GO:0009987;GO:0019538;GO:0034645;GO:0034960;GO:0034961;GO:0043170;GO:0043283;GO:0043284;GO:0044237;GO:0044238;GO:0044249;GO:0044260;GO:0044267	translation;metabolic process;biosynthetic process;macromolecule biosynthetic process;cellular process;protein metabolic process;cellular macromolecule biosynthetic process;cellular biopolymer metabolic process;cellular biopolymer biosynthetic process	mmu:68537	ko03010	Ribosome	K02871	20.677	178
IPI00930784	IPI00930784;IPI00308882	NADH-ubiquinone oxidoreductase 75 kDa subunit;NADH-ubiquinone oxidoreductase 75 kDa subunit, mitochondrial;Complex I-75kD	Ndufs1	NADH dehydrogenase (ubiquinone) Fe-S protein 1 precursor;NADH-ubiquinone oxidoreductase 75 kDa subunit, mitochondrial	17	16	11	-1.57178	0.0275322	-1.48205	-1.66151	-1.24824	-2.20786	45	60	Q3TIU7;Q3UIQ2;Q3UQ73;Q91VD9	Q3TIU7_MOUSE;NDUS1_MOUSE	ENSMUST00000027111	OTTMUSP00000002422	MGI:2443241;MGI:2443241	NP_001153510;NP_001153511;NP_001153512;NP_663493	PF09326;PF00111;PF00384;PF10588	DUF1982;Fer2;Molybdopterin;NADH-G_4Fe-4S_3	Domain of unknown function (DUF1982);2Fe-2S iron-sulfur cluster binding domain;Molybdopterin oxidoreductase;NADH-ubiquinone oxidoreductase-G iron-sulfur binding region	GO:0005747;GO:0005758;GO:0030964;GO:0031970;GO:0031974;GO:0032991;GO:0043234;GO:0044422;GO:0044424;GO:0044425;GO:0044429;GO:0044444;GO:0044446;GO:0044455;GO:0044464;GO:0045271	mitochondrial respiratory chain complex I;mitochondrial intermembrane space;NADH dehydrogenase complex;organelle envelope lumen;membrane-enclosed lumen;macromolecular complex;protein complex;organelle part;intracellular part;membrane part	GO:0003824;GO:0003954;GO:0005488;GO:0005515;GO:0008137;GO:0009055;GO:0016491;GO:0016651;GO:0016655;GO:0050136;GO:0051536;GO:0051540;GO:0005506;GO:0043167;GO:0043169;GO:0046872;GO:0046914;GO:0051537;GO:0051539	catalytic activity;NADH dehydrogenase activity;binding;protein binding;NADH dehydrogenase (ubiquinone) activity;electron carrier activity;oxidoreductase activity;oxidoreductase activity, acting on NADH or NADPH	GO:0006091;GO:0006139;GO:0006163;GO:0006753;GO:0006800;GO:0006807;GO:0006873;GO:0006915;GO:0008152;GO:0008219;GO:0009117;GO:0009141;GO:0009144;GO:0009150;GO:0009199;GO:0009205;GO:0009259;GO:0009987;GO:0012501;GO:0015980;GO:0016265;GO:0019725;GO:0022900;GO:0022904;GO:0042391;GO:0042592;GO:0042773;GO:0044237;GO:0044238;GO:0045333;GO:0046034;GO:0046483;GO:0048878;GO:0050801;GO:0051881;GO:0055082;GO:…	generation of precursor metabolites and energy;nucleobase, nucleoside, nucleotide and nucleic acid metabolic process;purine nucleotide metabolic process;nucleoside phosphate metabolic process;oxygen and reactive oxygen species metabolic process	mmu:227197	ko00190;ko05010;ko05012;ko05016	Oxidative phosphorylation;Alzheimer's disease;Parkinson's disease;Huntington's disease	K03934	79.776	727
IPI00759881	IPI00759881;IPI00331710	Putative uncharacterized protein;Acyl-CoA dehydrogenase family member 9, mitochondrial	Acad9	very-long-chain acyl-CoA dehydrogenase VLCAD homolog precursor;Acyl-CoA dehydrogenase family member 9, mitochondrial	3	2	1	-1.56837	0.0277998	-1.26401	-1.87199	-1.83835	-1.29839	30	27	Q3ULL9;Q8BTY0;Q9CZC5;Q8JZN5	Q3ULL9_MOUSE;ACAD9_MOUSE	ENSMUST00000011492	OTTMUSP00000027654;OTTMUSP00000027656	MGI:1914272;MGI:1914272	NP_766266	PF00441;PF02770;PF02771	Acyl-CoA_dh_1;Acyl-CoA_dh_M;Acyl-CoA_dh_N	Acyl-CoA dehydrogenase, C-terminal domain;Acyl-CoA dehydrogenase, middle domain;Acyl-CoA dehydrogenase, N-terminal domain	GO:0005739;GO:0043226;GO:0043227;GO:0043229;GO:0043231;GO:0044424;GO:0044444;GO:0044464	mitochondrion;organelle;membrane-bounded organelle;intracellular organelle;intracellular membrane-bounded organelle;intracellular part;cytoplasmic part;cell part	GO:0000166;GO:0001882;GO:0001883;GO:0003824;GO:0003995;GO:0005488;GO:0009055;GO:0016491;GO:0016627;GO:0017076;GO:0030554;GO:0048037;GO:0050660;GO:0050662	nucleotide binding;nucleoside binding;purine nucleoside binding;catalytic activity;acyl-CoA dehydrogenase activity;binding;electron carrier activity;oxidoreductase activity;oxidoreductase activity, acting on the CH-CH group of donors	GO:0008152;GO:0055114	metabolic process;oxidation reduction	mmu:229211	ko00624;ko00281	1- and 2-Methylnaphthalene degradation;Geraniol degradation	K00257	68.721	625
IPI00313475	IPI00313475;IPI00750074;IPI00776084;IPI00751391;IPI00776275;IPI00775853;IPI00776312	ATP synthase subunit gamma, mitochondrial;F-ATPase gamma subunit;ATP synthase gamma chain;ATP synthase, H+ transporting, mitochondrial F1 complex, gamma polypeptide 1	Atp5c1;RP23-119N4.1-003;RP23-119N4.1-002;RP23-119N4.1-005;RP23-119N4.1-007;RP23-119N4.1-004;RP23-119N4.1-006	ATP synthase subunit gamma, mitochondrial;ATP synthase, H+ transporting, mitochondrial F1 complex, gamma subunit isoform b;ATP synthase gamma chain;ATP synthase, H+ transporting, mitochondrial F1 complex, gamma polypeptide 1;ATP synthase, H+ transporting,	16	13	10	-1.56058	0.0284195	-1.60587	-1.86316	-1.5153	-1.38054	12	6	Q91VR2;Q3UD06;Q9D9D7;Q9ERA8;Q8C2Q8;Q9Z1F5;A2AKU9;A2AKV3;A2AKV2;A2AKV1;A2AKV0	ATPG_MOUSE;Q8C2Q8_MOUSE;A2AKU9_MOUSE;A2AKV3_MOUSE;A2AKV2_MOUSE;A2AKV1_MOUSE;A2AKV0_MOUSE	ENSMUST00000114897;ENSMUST00000114896;ENSMUST00000026887	OTTMUSP00000018960;OTTMUSP00000011846;OTTMUSP00000011847;OTTMUSP00000018957;OTTMUSP00000018959;OTTMUSP00000018961;OTTMUSP00000018958	MGI:1261437;MGI:1261437;MGI:1261437;MGI:1261437;MGI:1261437;MGI:1261437;MGI:1261437	NP_065640;NP_001106209	PF00231	ATP-synt	ATP synthase	GO:0005743;GO:0016020;GO:0019866;GO:0031090;GO:0031966;GO:0032991;GO:0033178;GO:0043234;GO:0044422;GO:0044424;GO:0044425;GO:0044429;GO:0044444;GO:0044446;GO:0044464;GO:0045261	mitochondrial inner membrane;membrane;organelle inner membrane;organelle membrane;mitochondrial membrane;macromolecular complex;proton-transporting two-sector ATPase complex, catalytic domain;protein complex;organelle part;intracellular part;membrane part	GO:0003824;GO:0005215;GO:0008324;GO:0015075;GO:0015077;GO:0015078;GO:0015399;GO:0015405;GO:0016462;GO:0016787;GO:0016817;GO:0016818;GO:0016820;GO:0016887;GO:0017111;GO:0019829;GO:0022804;GO:0022857;GO:0022890;GO:0022891;GO:0022892;GO:0042623;GO:0042625;GO:0042626;GO:0043492;GO:0046933;GO:0046961	catalytic activity;transporter activity;cation transmembrane transporter activity;ion transmembrane transporter activity;monovalent inorganic cation transmembrane transporter activity;hydrogen ion transmembrane transporter activity	GO:0006139;GO:0006163;GO:0006164;GO:0006753;GO:0006754;GO:0006807;GO:0006810;GO:0006811;GO:0006812;GO:0006818;GO:0008152;GO:0009058;GO:0009117;GO:0009141;GO:0009142;GO:0009144;GO:0009145;GO:0009150;GO:0009152;GO:0009165;GO:0009199;GO:0009201;GO:0009205;GO:0009206;GO:0009259;GO:0009260;GO:0009987;GO:0015672;GO:0015985;GO:0015986;GO:0015992;GO:0034220;GO:0044237;GO:0044238;GO:0044249;GO:0046034;GO:…	nucleobase, nucleoside, nucleotide and nucleic acid metabolic process;purine nucleotide metabolic process;purine nucleotide biosynthetic process;nucleoside phosphate metabolic process;ATP biosynthetic process;nitrogen compound metabolic process;transport	mmu:11949	ko00190;ko05010;ko05012;ko05016	Oxidative phosphorylation;Alzheimer's disease;Parkinson's disease;Huntington's disease	K02136	32.886	298
IPI00118227	IPI00118227	39S ribosomal protein L27, mitochondrial;L27mt;MRP-L27	Mrpl27	39S ribosomal protein L27, mitochondrial	2	2	2	-1.55088	0.0292077	-1.16933	-2.06949	-0.996357	-1.93243	36	18	Q99N92;Q5SUY2	RM27_MOUSE	ENSMUST00000025278;ENSMUST00000096579	OTTMUSP00000001960	MGI:2137224	NP_444391;XP_001474707;XP_892550	PF01016	Ribosomal_L27	Ribosomal L27 protein	GO:0000315;GO:0005762;GO:0015934;GO:0030529;GO:0032991;GO:0033279;GO:0044422;GO:0044424;GO:0044429;GO:0044444;GO:0044446;GO:0044464	organellar large ribosomal subunit;mitochondrial large ribosomal subunit;large ribosomal subunit;ribonucleoprotein complex;macromolecular complex;ribosomal subunit;organelle part;intracellular part;mitochondrial part;cytoplasmic part	GO:0003735;GO:0005198	structural constituent of ribosome;structural molecule activity	GO:0006412;GO:0008152;GO:0009058;GO:0009059;GO:0009987;GO:0019538;GO:0034645;GO:0034960;GO:0034961;GO:0043170;GO:0043283;GO:0043284;GO:0044237;GO:0044238;GO:0044249;GO:0044260;GO:0044267	translation;metabolic process;biosynthetic process;macromolecule biosynthetic process;cellular process;protein metabolic process;cellular macromolecule biosynthetic process;cellular biopolymer metabolic process;cellular biopolymer biosynthetic process	mmu:622268;mmu:94064				15.944	148
IPI00311072	IPI00311072;IPI00760006;IPI00850524	Cysteine desulfurase, mitochondrial	Nfs1;Nifs	nitrogen fixation gene, yeast homolog 1;Isoform Cytoplasmic of Cysteine desulfurase, mitochondrial	3	2	2	-1.54728	0.0295045	-1.72669	-2.33056	-1.36787	-1.28935	33	24	Q9Z1J3-1;Q9Z1J3;Q8C6I5;Q921V3;Q9CTB2;Q9Z1J3-2	NFS1_MOUSE	ENSMUST00000029147	OTTMUSP00000044757	MGI:1316706;MGI:1316706	NP_035041	PF00266	Aminotran_5	Aminotransferase class-V	GO:0005634;GO:0005759;GO:0043226;GO:0043227;GO:0043229;GO:0043231;GO:0044422;GO:0044424;GO:0044429;GO:0044444;GO:0044446;GO:0044464	nucleus;mitochondrial matrix;organelle;membrane-bounded organelle;intracellular organelle;intracellular membrane-bounded organelle;organelle part;intracellular part;mitochondrial part;cytoplasmic part;intracellular organelle part;cell part	GO:0003824;GO:0005488;GO:0005496;GO:0008289;GO:0016740;GO:0016782;GO:0016783;GO:0019842;GO:0030170;GO:0031071;GO:0048037;GO:0070279	catalytic activity;binding;steroid binding;lipid binding;transferase activity;transferase activity, transferring sulfur-containing groups;sulfurtransferase activity;vitamin binding;pyridoxal phosphate binding;cysteine desulfurase activity;cofactor binding	GO:0000096;GO:0006082;GO:0006464;GO:0006519;GO:0006520;GO:0006534;GO:0006725;GO:0006732;GO:0006777;GO:0006790;GO:0006807;GO:0008152;GO:0009058;GO:0009069;GO:0009108;GO:0009308;GO:0009987;GO:0016226;GO:0018130;GO:0018282;GO:0018283;GO:0019438;GO:0019538;GO:0019720;GO:0019752;GO:0031163;GO:0032324;GO:0034641;GO:0034960;GO:0042180;GO:0042558;GO:0042559;GO:0043170;GO:0043283;GO:0043412;GO:0043436;GO:…	sulfur amino acid metabolic process;organic acid metabolic process;protein modification process;cellular amino acid and derivative metabolic process;cellular amino acid metabolic process;cysteine metabolic process	mmu:18041	ko00730	Thiamine metabolism	K04487	50.569	459
IPI00124248	IPI00124248;IPI00117947	Chloride channel regulator;Methylosome subunit pICln;Chloride conductance regulatory protein ICln;Chloride channel, nucleotide sensitive 1A;Chloride ion current inducer protein	Clns1a;Icln;Clci;Clcni	Chloride channel, nucleotide-sensitive, 1A, isoform CRA_b;Methylosome subunit pICln	7	7	3	-1.54722	0.0295093	-1.53601	-1.55843	-1.77257	-1.46675	78	111	P97506;Q923F1;Q61189	P97506_MOUSE;ICLN_MOUSE	ENSMUST00000026506	OTTMUSP00000029289	MGI:109638;MGI:109638	NP_076160	PF03517	ICln_channel	Nucleotide-sensitive chloride conductance regulator (ICln)	GO:0005829;GO:0044424;GO:0044444;GO:0044464;GO:0005634;GO:0043226;GO:0043227;GO:0043229;GO:0043231	cytosol;intracellular part;cytoplasmic part;cell part;nucleus;organelle;membrane-bounded organelle;intracellular organelle;intracellular membrane-bounded organelle			GO:0006810;GO:0006811;GO:0006820;GO:0006821;GO:0006884;GO:0009987;GO:0015698;GO:0019725;GO:0042592;GO:0051234;GO:0065007;GO:0065008	transport;ion transport;anion transport;chloride transport;cell volume homeostasis;cellular process;inorganic anion transport;cellular homeostasis;homeostatic process;establishment of localization;biological regulation;regulation of biological quality	mmu:12729			K05019	26.522	241
IPI00130280	IPI00130280;IPI00857316;REV_IPI00468189;REV_IPI00652673;REV_IPI00406230;REV_IPI00108775;REV_IPI00653674	ATP synthase subunit alpha, mitochondrial	Atp5a1	ATP synthase subunit alpha, mitochondrial	2	2	1	-1.54685	0.0295401	-1.51507	-1.87184	-1.32258	-1.57864	591	598	Q03265	ATPA_MOUSE	ENSMUST00000026495	OTTMUSP00000019113	MGI:88115	NP_031531	PF00006;PF00306;PF02874	ATP-synt_ab;ATP-synt_ab_C;ATP-synt_ab_N	ATP synthase alpha/beta family, nucleotide-binding domain;ATP synthase alpha/beta chain, C terminal domain;ATP synthase alpha/beta family, beta-barrel domain	GO:0005743;GO:0016020;GO:0019866;GO:0031090;GO:0031966;GO:0032991;GO:0033178;GO:0043234;GO:0044422;GO:0044424;GO:0044425;GO:0044429;GO:0044444;GO:0044446;GO:0044464;GO:0045261	mitochondrial inner membrane;membrane;organelle inner membrane;organelle membrane;mitochondrial membrane;macromolecular complex;proton-transporting two-sector ATPase complex, catalytic domain;protein complex;organelle part;intracellular part;membrane part	GO:0000166;GO:0001882;GO:0001883;GO:0003824;GO:0005215;GO:0005488;GO:0005524;GO:0008324;GO:0015075;GO:0015077;GO:0015078;GO:0015399;GO:0015405;GO:0016462;GO:0016787;GO:0016817;GO:0016818;GO:0016820;GO:0016887;GO:0017076;GO:0017111;GO:0019829;GO:0022804;GO:0022857;GO:0022890;GO:0022891;GO:0022892;GO:0030554;GO:0032553;GO:0032555;GO:0032559;GO:0042623;GO:0042625;GO:0042626;GO:0043492;GO:0046933;GO:…	nucleotide binding;nucleoside binding;purine nucleoside binding;catalytic activity;transporter activity;binding;ATP binding;cation transmembrane transporter activity;ion transmembrane transporter activity	GO:0006139;GO:0006163;GO:0006164;GO:0006629;GO:0006753;GO:0006754;GO:0006807;GO:0006810;GO:0006811;GO:0006812;GO:0006818;GO:0008152;GO:0009058;GO:0009117;GO:0009141;GO:0009142;GO:0009144;GO:0009145;GO:0009150;GO:0009152;GO:0009165;GO:0009199;GO:0009201;GO:0009205;GO:0009206;GO:0009259;GO:0009260;GO:0009790;GO:0009987;GO:0015672;GO:0015985;GO:0015986;GO:0015992;GO:0032502;GO:0034220;GO:0044237;GO:…	nucleobase, nucleoside, nucleotide and nucleic acid metabolic process;purine nucleotide metabolic process;purine nucleotide biosynthetic process;lipid metabolic process;nucleoside phosphate metabolic process;ATP biosynthetic process	mmu:11946	ko00190;ko05010;ko05012;ko05016	Oxidative phosphorylation;Alzheimer's disease;Parkinson's disease;Huntington's disease	K02132	59.752	553
IPI00133750	IPI00133750	39S ribosomal protein L53, mitochondrial	Mrpl53	39S ribosomal protein L53, mitochondrial	3	3	2	-1.54179	0.0299625	-1.54768	-2.04942	-1.53589	-1.03944	72	57	Q9D1H8	RM53_MOUSE	ENSMUST00000113938	OTTMUSP00000028889	MGI:1915749	NP_081020	PF10780	MRP_L53	39S ribosomal protein L53/MRP-L53	GO:0005739;GO:0005840;GO:0030529;GO:0032991;GO:0043226;GO:0043227;GO:0043228;GO:0043229;GO:0043231;GO:0043232;GO:0044424;GO:0044444;GO:0044464	mitochondrion;ribosome;ribonucleoprotein complex;macromolecular complex;organelle;membrane-bounded organelle;non-membrane-bounded organelle;intracellular organelle;intracellular membrane-bounded organelle;intracellular non-membrane-bounded organelle					mmu:68499				12.737	118
IPI00130460	IPI00130460;IPI00928416;IPI00928387;IPI00927972;IPI00928252;IPI00928014	NADH dehydrogenase [ubiquinone] flavoprotein 1, mitochondrial;NADH-ubiquinone oxidoreductase 51 kDa subunit;Complex I-51kD	Ndufv1	NADH dehydrogenase [ubiquinone] flavoprotein 1, mitochondrial;50 kDa protein;42 kDa protein	15	12	10	-1.54099	0.0300297	-1.41488	-1.73068	-1.31765	-1.6671	591	598	Q91YT0	NDUV1_MOUSE	ENSMUST00000042497	OTTMUSP00000046526;OTTMUSP00000046527;OTTMUSP00000046528	MGI:107851	NP_598427	PF01512;PF10589;PF10531	Complex1_51K;NADH_4Fe-4S;SLBB	Respiratory-chain NADH dehydrogenase 51 Kd subunit;NADH-ubiquinone oxidoreductase-F iron-sulfur binding region;SLBB domain	GO:0005743;GO:0016020;GO:0019866;GO:0031090;GO:0031966;GO:0044422;GO:0044424;GO:0044425;GO:0044429;GO:0044444;GO:0044446;GO:0044464;GO:0070469	mitochondrial inner membrane;membrane;organelle inner membrane;organelle membrane;mitochondrial membrane;organelle part;intracellular part;membrane part;mitochondrial part;cytoplasmic part;intracellular organelle part;cell part;respiratory chain	GO:0000166;GO:0003824;GO:0003954;GO:0005488;GO:0005506;GO:0005529;GO:0008137;GO:0010181;GO:0016491;GO:0016651;GO:0016655;GO:0030246;GO:0043167;GO:0043169;GO:0046872;GO:0046914;GO:0048029;GO:0048037;GO:0050136;GO:0050662;GO:0051287;GO:0051536;GO:0051539;GO:0051540	nucleotide binding;catalytic activity;NADH dehydrogenase activity;binding;iron ion binding;sugar binding;NADH dehydrogenase (ubiquinone) activity;FMN binding;oxidoreductase activity;oxidoreductase activity, acting on NADH or NADPH	GO:0006091;GO:0006810;GO:0008152;GO:0009987;GO:0022900;GO:0044237;GO:0051234;GO:0055114	generation of precursor metabolites and energy;transport;metabolic process;cellular process;electron transport chain;cellular metabolic process;establishment of localization;oxidation reduction	mmu:17995	ko00190;ko05010;ko05012;ko05016	Oxidative phosphorylation;Alzheimer's disease;Parkinson's disease;Huntington's disease	K03942	50.834	464
IPI00110588	IPI00110588	Moesin;Membrane-organizing extension spike protein	Msn	Moesin	23	19	16	-1.53977	0.0301319	-1.60464	-1.56703	-1.51252	-1.50129	6	6	P26041;Q05DU4;Q3TZQ2;Q3UF33	MOES_MOUSE	ENSMUST00000117399	OTTMUSP00000019702	MGI:97167	NP_034963	PF00769;PF09380;PF00373;PF09379	ERM;FERM_C;FERM_M;FERM_N	Ezrin/radixin/moesin family;FERM C-terminal PH-like domain;FERM central domain;FERM N-terminal domain	GO:0001931;GO:0005737;GO:0005856;GO:0016323;GO:0016324;GO:0019898;GO:0031253;GO:0031528;GO:0042995;GO:0043226;GO:0043228;GO:0043229;GO:0043232;GO:0044424;GO:0044425;GO:0044459;GO:0044463;GO:0044464	uropod;cytoplasm;cytoskeleton;basolateral plasma membrane;apical plasma membrane;extrinsic to membrane;cell projection membrane;microvillus membrane;cell projection;organelle;non-membrane-bounded organelle;intracellular organelle	GO:0005488;GO:0005515;GO:0008092	binding;protein binding;cytoskeletal protein binding	GO:0002376;GO:0006928;GO:0007155;GO:0007159;GO:0009987;GO:0016337;GO:0016477;GO:0022406;GO:0022610;GO:0022614;GO:0048870;GO:0050900	immune system process;cell motion;cell adhesion;leukocyte adhesion;cellular process;cell-cell adhesion;cell migration;membrane docking;biological adhesion;membrane to membrane docking;cell motility;leukocyte migration	mmu:17698	ko04810;ko04670	Regulation of actin cytoskeleton;Leukocyte transendothelial migration	K05763	67.766	577
IPI00315808	IPI00315808;IPI00856534	28S ribosomal protein S36, mitochondrial;MRP-S36;Putative uncharacterized protein	Mrps36	28S ribosomal protein S36, mitochondrial;Putative uncharacterized protein	3	3	2	-1.5285	0.0310945	-1.29056	-1.80616	-1.41308	-1.64393	81	63	Q9CQX8;Q9D6T9	RT36_MOUSE;Q9D6T9_MOUSE	ENSMUST00000109333;ENSMUST00000078573	OTTMUSP00000026287;OTTMUSP00000026288	MGI:1913378;MGI:1913378	NP_079645				GO:0000314;GO:0005763;GO:0015935;GO:0030529;GO:0032991;GO:0033279;GO:0044422;GO:0044424;GO:0044429;GO:0044444;GO:0044446;GO:0044464	organellar small ribosomal subunit;mitochondrial small ribosomal subunit;small ribosomal subunit;ribonucleoprotein complex;macromolecular complex;ribosomal subunit;organelle part;intracellular part;mitochondrial part;cytoplasmic part					mmu:66128				11.101	102
IPI00110672	IPI00110672	28S ribosomal protein S28, mitochondrial;MRP-S28	Mrps28	28S ribosomal protein S28, mitochondrial	2	2	1	-1.52835	0.0311078	-1.65733	-2.49793	-1.39937	-0.90162	12	9	Q9CY16	RT28_MOUSE	ENSMUST00000042148	OTTMUSP00000025381	MGI:1913480	NP_079710	PF10246	MRP-S35	Mitochondrial ribosomal protein MRP-S35	GO:0005739;GO:0005840;GO:0030529;GO:0032991;GO:0043226;GO:0043227;GO:0043228;GO:0043229;GO:0043231;GO:0043232;GO:0044424;GO:0044444;GO:0044464	mitochondrion;ribosome;ribonucleoprotein complex;macromolecular complex;organelle;membrane-bounded organelle;non-membrane-bounded organelle;intracellular organelle;intracellular membrane-bounded organelle;intracellular non-membrane-bounded organelle					mmu:66230				20.52	186
IPI00927975	IPI00927975;IPI00124444;IPI00661241;IPI00928462	Putative uncharacterized protein;6-phosphofructokinase type C;Phosphofructokinase 1;Phosphohexokinase;Phosphofructo-1-kinase isozyme C	Pfkp;Pfkc	Putative uncharacterized protein;Isoform 1 of 6-phosphofructokinase type C;Isoform 2 of 6-phosphofructokinase type C	18	17	13	-1.52833	0.0311095	-1.69597	-1.36069	-1.98097	-1.19076	9	9	Q8C605;Q9WUA3-1;Q9WUA3;Q8C8E8;Q9D255;Q9WUA3-2	Q8C605_MOUSE;K6PP_MOUSE	ENSMUST00000021614	OTTMUSP00000046091;OTTMUSP00000046085;OTTMUSP00000046092	MGI:1891833;MGI:1891833;MGI:1891833	NP_062677	PF00365	PFK	Phosphofructokinase	GO:0005945;GO:0032991;GO:0043234;GO:0044424;GO:0044444;GO:0044445;GO:0044464	6-phosphofructokinase complex;macromolecular complex;protein complex;intracellular part;cytoplasmic part;cytosolic part;cell part	GO:0003824;GO:0003872;GO:0005488;GO:0005515;GO:0008443;GO:0016301;GO:0016740;GO:0016772;GO:0016773;GO:0019200;GO:0000166;GO:0000287;GO:0001882;GO:0001883;GO:0005524;GO:0017076;GO:0030554;GO:0032553;GO:0032555;GO:0032559;GO:0043167;GO:0043169;GO:0046872	catalytic activity;6-phosphofructokinase activity;binding;protein binding;phosphofructokinase activity;kinase activity;transferase activity;transferase activity, transferring phosphorus-containing groups	GO:0005975;GO:0005996;GO:0006006;GO:0006007;GO:0006066;GO:0006091;GO:0006096;GO:0008152;GO:0009056;GO:0009987;GO:0016052;GO:0019318;GO:0019320;GO:0044237;GO:0044238;GO:0046164;GO:0046365	carbohydrate metabolic process;monosaccharide metabolic process;glucose metabolic process;glucose catabolic process;alcohol metabolic process;generation of precursor metabolites and energy;glycolysis;metabolic process;catabolic process;cellular process	mmu:56421	ko00010;ko00030;ko00051;ko00052	Glycolysis / Gluconeogenesis;Pentose phosphate pathway;Fructose and mannose metabolism;Galactose metabolism	K00850	85.546	784
IPI00750256	IPI00750256;IPI00128209;IPI00752998	Adenylate kinase isoenzyme 1;ATP-AMP transphosphorylase 1;Myokinase	Ak1	Isoform 2 of Adenylate kinase isoenzyme 1;Isoform 1 of Adenylate kinase isoenzyme 1;10 kDa protein	9	7	8	-1.52761	0.031172	-1.5647	-1.49051	-1.57893	-1.31658	234	165	Q9R0Y5-2;Q9R0Y5;Q9R0Y5-1	KAD1_MOUSE	ENSMUST00000068271;ENSMUST00000113277;ENSMUST00000113278	OTTMUSP00000012847;OTTMUSP00000012845;OTTMUSP00000012846;OTTMUSP00000012848	MGI:87977;MGI:87977	NP_067490	PF00406	ADK	Adenylate kinase	GO:0005739;GO:0005886;GO:0016020;GO:0043226;GO:0043227;GO:0043229;GO:0043231;GO:0044424;GO:0044444;GO:0044464	mitochondrion;plasma membrane;membrane;organelle;membrane-bounded organelle;intracellular organelle;intracellular membrane-bounded organelle;intracellular part;cytoplasmic part;cell part	GO:0000166;GO:0001882;GO:0001883;GO:0003824;GO:0004017;GO:0005488;GO:0005524;GO:0016301;GO:0016740;GO:0016772;GO:0016776;GO:0017076;GO:0019201;GO:0019205;GO:0030554;GO:0032553;GO:0032555;GO:0032559	nucleotide binding;nucleoside binding;purine nucleoside binding;catalytic activity;adenylate kinase activity;binding;ATP binding;kinase activity;transferase activity;transferase activity, transferring phosphorus-containing groups	GO:0006139;GO:0006163;GO:0006753;GO:0006807;GO:0007050;GO:0008152;GO:0009117;GO:0009141;GO:0009144;GO:0009150;GO:0009199;GO:0009205;GO:0009259;GO:0009987;GO:0022402;GO:0044237;GO:0044238;GO:0046034;GO:0046483;GO:0055086	nucleobase, nucleoside, nucleotide and nucleic acid metabolic process;purine nucleotide metabolic process;nucleoside phosphate metabolic process;nitrogen compound metabolic process;cell cycle arrest;metabolic process;nucleotide metabolic process					23.116	210
IPI00222548	IPI00222548;IPI00849107;IPI00849210;IPI00676157;IPI00461500;IPI00662684;IPI00849550;IPI00762791;IPI00757474;IPI00849245;IPI00850168;IPI00874437;IPI00850143;IPI00850140;IPI00752952;IPI00553385;IPI00350329;IPI00849542;IPI00381643;IPI00270333	60S ribosomal protein L29	Rpl29;Rpl43	60S ribosomal protein L29;similar to ribosomal protein;similar to ribosomal protein;similar to ribosomal protein;similar to ribosomal protein;similar to ribosomal protein isoform 1;similar to ribosomal protein;similar to ribosomal protein;similar to riboso	9	9	8	-1.52518	0.0313827	-1.70402	-1.41853	-1.4394	-1.61097	507	321	P47915;Q5M8M8	RL29_MOUSE	ENSMUST00000059802	OTTMUSP00000045901	MGI:99687	NP_033108;XP_979163;XP_990228;XP_996735;XP_001475795;XP_001473950;XP_001478414;XP_911856;XP_484210;XP_914215;XP_001475761;XP_920024;XP_001476205;XP_001472633;XP_001473361;XP_986754;XP_910381;XP_356848;XP_001474651;XP_001477526	PF01779	Ribosomal_L29e	Ribosomal L29e protein family	GO:0000267;GO:0000300;GO:0005624;GO:0005626;GO:0005840;GO:0022626;GO:0030529;GO:0032991;GO:0042788;GO:0043226;GO:0043228;GO:0043229;GO:0043232;GO:0044424;GO:0044444;GO:0044445;GO:0044464	cell fraction;peripheral to membrane of membrane fraction;membrane fraction;insoluble fraction;ribosome;cytosolic ribosome;ribonucleoprotein complex;macromolecular complex;polysomal ribosome;organelle;non-membrane-bounded organelle;intracellular organelle	GO:0001871;GO:0003735;GO:0005198;GO:0005488;GO:0005539;GO:0008201;GO:0030246;GO:0030247	pattern binding;structural constituent of ribosome;structural molecule activity;binding;glycosaminoglycan binding;heparin binding;carbohydrate binding;polysaccharide binding	GO:0006412;GO:0007155;GO:0008152;GO:0008283;GO:0009058;GO:0009059;GO:0009987;GO:0019538;GO:0022610;GO:0031589;GO:0032501;GO:0034645;GO:0034960;GO:0034961;GO:0035264;GO:0040007;GO:0043170;GO:0043283;GO:0043284;GO:0044237;GO:0044238;GO:0044249;GO:0044260;GO:0044267	translation;cell adhesion;metabolic process;cell proliferation;biosynthetic process;macromolecule biosynthetic process;cellular process;protein metabolic process;biological adhesion;cell-substrate adhesion;multicellular organismal process	mmu:19944;mmu:665032;mmu:666642	ko03010	Ribosome	K02905	17.587	160
IPI00131459	IPI00131459;IPI00649586;IPI00854035;IPI00551485	Nucleoside diphosphate kinase A;Tumor metastatic process-associated protein;Metastasis inhibition factor NM23;NDPK-A;nm23-M1;Nucleoside diphosphate kinase	Nme1;Nm23;RP23-378I13.1-002	Nucleoside diphosphate kinase A;Nucleoside diphosphate kinase;similar to Nucleoside diphosphate kinase A	8	8	5	-1.5218	0.0316791	-1.78874	-1.25486	-2.17201	-0.815161	591	598	P15532;Q5NC81;Q5NC80	NDKA_MOUSE;Q5NC80_MOUSE	ENSMUST00000021220	OTTMUSP00000001440;OTTMUSP00000001441	MGI:97355;MGI:97355	NP_032730;XP_001476969;XP_001478876	PF00334	NDK	Nucleoside diphosphate kinase	GO:0000267;GO:0005624;GO:0005625;GO:0005626;GO:0005634;GO:0005737;GO:0005792;GO:0042598;GO:0043226;GO:0043227;GO:0043229;GO:0043231;GO:0044424;GO:0044464	cell fraction;membrane fraction;soluble fraction;insoluble fraction;nucleus;cytoplasm;microsome;vesicular fraction;organelle;membrane-bounded organelle;intracellular organelle;intracellular membrane-bounded organelle;intracellular part;cell part	GO:0000166;GO:0000287;GO:0001882;GO:0001883;GO:0003824;GO:0004550;GO:0005488;GO:0005524;GO:0016301;GO:0016740;GO:0016772;GO:0016776;GO:0017076;GO:0019205;GO:0030554;GO:0032553;GO:0032555;GO:0032559;GO:0043167;GO:0043169;GO:0046872	nucleotide binding;magnesium ion binding;nucleoside binding;purine nucleoside binding;catalytic activity;nucleoside diphosphate kinase activity;binding;ATP binding;kinase activity;transferase activity	GO:0006139;GO:0006163;GO:0006164;GO:0006183;GO:0006213;GO:0006220;GO:0006221;GO:0006228;GO:0006241;GO:0006753;GO:0006807;GO:0006810;GO:0006897;GO:0007399;GO:0007595;GO:0008152;GO:0009058;GO:0009116;GO:0009117;GO:0009119;GO:0009141;GO:0009142;GO:0009144;GO:0009145;GO:0009147;GO:0009148;GO:0009150;GO:0009152;GO:0009165;GO:0009199;GO:0009201;GO:0009205;GO:0009206;GO:0009208;GO:0009209;GO:0009218;GO:…	nucleobase, nucleoside, nucleotide and nucleic acid metabolic process;purine nucleotide metabolic process;purine nucleotide biosynthetic process;GTP biosynthetic process;pyrimidine nucleoside metabolic process;pyrimidine nucleotide metabolic process	mmu:100046344;mmu:18102	ko00230;ko00240	Purine metabolism;Pyrimidine metabolism	K00940	17.208	152
IPI00134961	IPI00134961;IPI00894719	Medium-chain specific acyl-CoA dehydrogenase, mitochondrial	Acadm	Medium-chain specific acyl-CoA dehydrogenase, mitochondrial	5	5	1	-1.51351	0.0324138	-1.47593	-2.08118	-1.43261	-1.5511	6	3	P45952;Q3V2I9;Q8BJT5;Q91WS8	ACADM_MOUSE	ENSMUST00000072697	OTTMUSP00000041123	MGI:87867	NP_031408	PF00441;PF02770;PF02771	Acyl-CoA_dh_1;Acyl-CoA_dh_M;Acyl-CoA_dh_N	Acyl-CoA dehydrogenase, C-terminal domain;Acyl-CoA dehydrogenase, middle domain;Acyl-CoA dehydrogenase, N-terminal domain	GO:0005759;GO:0044422;GO:0044424;GO:0044429;GO:0044444;GO:0044446;GO:0044464	mitochondrial matrix;organelle part;intracellular part;mitochondrial part;cytoplasmic part;intracellular organelle part;cell part	GO:0000166;GO:0001882;GO:0001883;GO:0003824;GO:0003995;GO:0005488;GO:0009055;GO:0016491;GO:0016627;GO:0017076;GO:0030554;GO:0048037;GO:0050660;GO:0050662	nucleotide binding;nucleoside binding;purine nucleoside binding;catalytic activity;acyl-CoA dehydrogenase activity;binding;electron carrier activity;oxidoreductase activity;oxidoreductase activity, acting on the CH-CH group of donors	GO:0001889;GO:0006082;GO:0006519;GO:0006575;GO:0006576;GO:0006577;GO:0006629;GO:0006631;GO:0006635;GO:0006766;GO:0006767;GO:0006807;GO:0006950;GO:0008152;GO:0009056;GO:0009062;GO:0009266;GO:0009308;GO:0009409;GO:0009437;GO:0009605;GO:0009628;GO:0009791;GO:0009987;GO:0009991;GO:0016042;GO:0016054;GO:0019395;GO:0019752;GO:0030154;GO:0030258;GO:0031667;GO:0032502;GO:0032787;GO:0034440;GO:0035051;GO:…	liver development;organic acid metabolic process;cellular amino acid and derivative metabolic process;cellular amino acid derivative metabolic process;biogenic amine metabolic process;betaine metabolic process;lipid metabolic process	mmu:11364	ko00640;ko00071;ko00280;ko00410;ko03320	Propanoate metabolism;Fatty acid metabolism;Valine, leucine and isoleucine degradation;beta-Alanine metabolism;PPAR signaling pathway	K00249	46.481	421
IPI00227843	IPI00227843	Tripeptidyl-peptidase 2;Tripeptidyl-peptidase II;Tripeptidyl aminopeptidase	Tpp2	Isoform Short of Tripeptidyl-peptidase 2	3	3	3	-1.50793	0.0329171	-1.57401	-1.44185	-1.72266	-1.32805	60	72	Q64514-2;Q64514;Q05DJ9;Q3TB11;Q3V3M8;Q3V451;Q922K4	TPP2_MOUSE	ENSMUST00000087933;ENSMUST00000097767		MGI:102724		PF00082	Peptidase_S8	Subtilase family	GO:0005737;GO:0044424;GO:0044464	cytoplasm;intracellular part;cell part	GO:0003824;GO:0004175;GO:0004177;GO:0004252;GO:0008233;GO:0008236;GO:0008238;GO:0016787;GO:0017171;GO:0070011	catalytic activity;endopeptidase activity;aminopeptidase activity;serine-type endopeptidase activity;peptidase activity;serine-type peptidase activity;exopeptidase activity;hydrolase activity;serine hydrolase activity	GO:0006508;GO:0008152;GO:0009056;GO:0009057;GO:0019538;GO:0030163;GO:0043170;GO:0043283;GO:0043285;GO:0044238	proteolysis;metabolic process;catabolic process;macromolecule catabolic process;protein metabolic process;protein catabolic process;macromolecule metabolic process;biopolymer metabolic process;biopolymer catabolic process;primary metabolic process	mmu:22019			K01280	138.46	1249
IPI00353010	IPI00353010;IPI00785218	Nucleolar protein 14;Nucleolar complex protein 14;Putative uncharacterized protein	Nop14;Nol14	Nucleolar protein 14;probable nucleolar complex protein 14	5	5	4	-1.50037	0.0336083	-1.54356	-1.36808	-1.66263	-1.45719	57	30	Q8R3N1;Q3TSX5;Q5RL78;Q8C539;Q9CSY8	NOP14_MOUSE;Q3TSX5_MOUSE	ENSMUST00000041364	OTTMUSP00000026857	MGI:1922666;MGI:1922666	NP_083554	PF04147	Nop14	Nop14-like family	GO:0005730;GO:0043226;GO:0043228;GO:0043229;GO:0043232;GO:0044422;GO:0044424;GO:0044428;GO:0044446;GO:0044464	nucleolus;organelle;non-membrane-bounded organelle;intracellular organelle;intracellular non-membrane-bounded organelle;organelle part;intracellular part;nuclear part;intracellular organelle part;cell part	GO:0003676;GO:0003723;GO:0005488;GO:0005515;GO:0030515	nucleic acid binding;RNA binding;binding;protein binding;snoRNA binding	GO:0006139;GO:0006364;GO:0006396;GO:0006807;GO:0008152;GO:0009987;GO:0016070;GO:0016072;GO:0022613;GO:0030490;GO:0034470;GO:0034660;GO:0034960;GO:0042274;GO:0043170;GO:0043283;GO:0044085;GO:0044237;GO:0044238;GO:0044260	nucleobase, nucleoside, nucleotide and nucleic acid metabolic process;rRNA processing;RNA processing;nitrogen compound metabolic process;metabolic process;cellular process;RNA metabolic process;rRNA metabolic process;ribonucleoprotein complex biogenesis	mmu:75416				98.773	860
IPI00137758	IPI00137758;IPI00756194	Secernin-3	Scrn3	Secernin-3	4	2	3	-1.49841	0.0337898	-1.52662	-1.37383	-1.47907	-1.51776	66	51	Q3TMH2	SCRN3_MOUSE	ENSMUST00000090811	OTTMUSP00000014416	MGI:1921866	NP_083298										mmu:74616				47.661	418
IPI00121887	IPI00121887;IPI00930846;IPI00930819;IPI00224168;IPI00284630;IPI00886311;IPI00753843	Transcription elongation factor A protein 1;Transcription elongation factor S-II protein 1;Transcription elongation factor TFIIS.o	Tcea1;Tceat	Isoform 2 of Transcription elongation factor A protein 1;transcription elongation factor A (SII) 1 isoform 3;transcription elongation factor A (SII) 1 isoform 1;Isoform 1 of Transcription elongation factor A protein 1	14	14	12	-1.49457	0.0341469	-1.4548	-1.46245	-1.5267	-1.64408	162	102	P10711-1;P10711;Q3UPE0;Q3UWX7;Q9JMB4;P10711-2	TCEA1_MOUSE	ENSMUST00000081551		MGI:1196624;MGI:1196624	NP_035671;NP_001153222;NP_001153223	PF08711;PF01096;PF07500	TFIIS;TFIIS_C;TFIIS_M	Transcription elongation factor S-II protein N terminal;Transcription factor S-II (TFIIS);Transcription factor S-II (TFIIS), central domain	GO:0005654;GO:0044422;GO:0044424;GO:0044428;GO:0044446;GO:0044464	nucleoplasm;organelle part;intracellular part;nuclear part;intracellular organelle part;cell part	GO:0003676;GO:0003677;GO:0003702;GO:0003711;GO:0003746;GO:0005488;GO:0005515;GO:0008135;GO:0008270;GO:0030528;GO:0043167;GO:0043169;GO:0045182;GO:0046872;GO:0046914	nucleic acid binding;DNA binding;RNA polymerase II transcription factor activity;transcription elongation regulator activity;translation elongation factor activity;binding;protein binding;translation factor activity, nucleic acid binding;zinc ion binding	GO:0006139;GO:0006354;GO:0006355;GO:0006357;GO:0006807;GO:0008152;GO:0009889;GO:0009891;GO:0009893;GO:0009987;GO:0010468;GO:0010556;GO:0010557;GO:0010604;GO:0010628;GO:0016070;GO:0019219;GO:0019222;GO:0030099;GO:0030154;GO:0030218;GO:0031323;GO:0031325;GO:0031326;GO:0031328;GO:0032502;GO:0034960;GO:0043170;GO:0043283;GO:0044237;GO:0044238;GO:0044260;GO:0045449;GO:0045893;GO:0045935;GO:0045941;GO:…	nucleobase, nucleoside, nucleotide and nucleic acid metabolic process;RNA elongation;regulation of transcription, DNA-dependent;regulation of transcription from RNA polymerase II promoter;nitrogen compound metabolic process;metabolic process	mmu:21399	ko03022	Basal transcription factors	K03145	33.88	301
IPI00120917	IPI00120917	AN1-type zinc finger protein 6;Zinc finger A20 domain-containing protein 3;Associated with PRK1 protein	Zfand6;Awp1;Za20d3	AN1-type zinc finger protein 6	4	4	3	-1.48452	0.0350977	-1.55018	-1.41885	-1.68791	-1.25636	12	6	Q9DCH6	ZFAN6_MOUSE	ENSMUST00000069537		MGI:1929510	NP_075361	PF01754;PF01428	zf-A20;zf-AN1	A20-like zinc finger;AN1-like Zinc finger			GO:0003676;GO:0003677;GO:0005488;GO:0005515;GO:0008270;GO:0043167;GO:0043169;GO:0046872;GO:0046914	nucleic acid binding;DNA binding;binding;protein binding;zinc ion binding;ion binding;cation binding;metal ion binding;transition metal ion binding	GO:0007154;GO:0007165;GO:0009987;GO:0050789;GO:0050794;GO:0065007	cell communication;signal transduction;cellular process;regulation of biological process;regulation of cellular process;biological regulation	mmu:65098				24.001	223
IPI00230507	IPI00230507;IPI00623553;IPI00881799;IPI00889805	ATP synthase subunit d, mitochondrial;ATP synthase, H+ transporting, mitochondrial F0 complex, subunit d	Atp5h;RP23-380B14.2-007	ATP synthase subunit d, mitochondrial;hypothetical protein;ATP synthase, H+ transporting, mitochondrial F0 complex, subunit d	4	4	4	-1.48315	0.0352289	-1.11956	-1.84674	-0.828601	-1.87245	198	132	Q9DCX2;B1ASE2	ATP5H_MOUSE;B1ASE2_MOUSE	ENSMUST00000043931;ENSMUST00000073791;ENSMUST00000106537;ENSMUST00000090488	OTTMUSP00000003504;OTTMUSP00000003505;OTTMUSP00000003506;OTTMUSP00000036235	MGI:1918929	NP_082138;XP_001472344;XP_001472543;XP_001472561	PF05873	Mt_ATP-synt_D	ATP synthase D chain, mitochondrial (ATP5H)	GO:0000276;GO:0032991;GO:0033177;GO:0043234;GO:0044422;GO:0044424;GO:0044425;GO:0044429;GO:0044444;GO:0044446;GO:0044455;GO:0044464;GO:0045263	mitochondrial proton-transporting ATP synthase complex, coupling factor F(o);macromolecular complex;proton-transporting two-sector ATPase complex, proton-transporting domain;protein complex;organelle part;intracellular part;membrane part	GO:0005215;GO:0008324;GO:0015075;GO:0015077;GO:0015078;GO:0022857;GO:0022890;GO:0022891;GO:0022892	transporter activity;cation transmembrane transporter activity;ion transmembrane transporter activity;monovalent inorganic cation transmembrane transporter activity;hydrogen ion transmembrane transporter activity;transmembrane transporter activity	GO:0006139;GO:0006163;GO:0006164;GO:0006753;GO:0006754;GO:0006807;GO:0006810;GO:0006811;GO:0006812;GO:0006818;GO:0008152;GO:0009058;GO:0009117;GO:0009141;GO:0009142;GO:0009144;GO:0009145;GO:0009150;GO:0009152;GO:0009165;GO:0009199;GO:0009201;GO:0009205;GO:0009206;GO:0009259;GO:0009260;GO:0009987;GO:0015672;GO:0015985;GO:0015986;GO:0015992;GO:0034220;GO:0044237;GO:0044238;GO:0044249;GO:0046034;GO:…	nucleobase, nucleoside, nucleotide and nucleic acid metabolic process;purine nucleotide metabolic process;purine nucleotide biosynthetic process;nucleoside phosphate metabolic process;ATP biosynthetic process;nitrogen compound metabolic process;transport	mmu:71679	ko00190;ko05010;ko05012;ko05016	Oxidative phosphorylation;Alzheimer's disease;Parkinson's disease;Huntington's disease	K02138	18.749	161
IPI00461536	IPI00461536;IPI00670802	Nucleolar protein 8	Nol8	nucleolar protein 8;Isoform 2 of Nucleolar protein 8	6	6	4	-1.45526	0.0379872	-1.51068	-1.43982	-1.38653	-1.47071	270	213	Q3UHX0-1;Q3UHX0;Q3UHX0-2	NOL8_MOUSE	ENSMUST00000021824		MGI:1918180;MGI:1918180	NP_001074819				GO:0005730;GO:0043226;GO:0043228;GO:0043229;GO:0043232;GO:0044422;GO:0044424;GO:0044428;GO:0044446;GO:0044464	nucleolus;organelle;non-membrane-bounded organelle;intracellular organelle;intracellular non-membrane-bounded organelle;organelle part;intracellular part;nuclear part;intracellular organelle part;cell part	GO:0000166;GO:0003676;GO:0003723;GO:0005488;GO:0005515	nucleotide binding;nucleic acid binding;RNA binding;binding;protein binding							130.66	1165
IPI00126913	IPI00126913;IPI00464208	ATPase family AAA domain-containing protein 3;AAA-ATPase TOB3	Atad3;Atad3a;Kiaa1273	Isoform 1 of ATPase family AAA domain-containing protein 3;Isoform 2 of ATPase family AAA domain-containing protein 3	4	3	2	-1.4543	0.0380854	-1.35457	-2.84053	-0.605153	-1.55403	72	48	Q925I1-1;Q925I1;A2AD89;Q3TA78;Q925I1-2	ATAD3_MOUSE	ENSMUST00000030903;ENSMUST00000105594	OTTMUSP00000011641	MGI:1919214;MGI:1919214	NP_849534	PF00004	AAA	ATPase family associated with various cellular activities (AAA)	GO:0005743;GO:0016020;GO:0019866;GO:0031090;GO:0031966;GO:0044422;GO:0044424;GO:0044429;GO:0044444;GO:0044446;GO:0044464	mitochondrial inner membrane;membrane;organelle inner membrane;organelle membrane;mitochondrial membrane;organelle part;intracellular part;mitochondrial part;cytoplasmic part;intracellular organelle part;cell part	GO:0000166;GO:0001882;GO:0001883;GO:0003824;GO:0005488;GO:0005524;GO:0016462;GO:0016787;GO:0016817;GO:0016818;GO:0017076;GO:0017111;GO:0030554;GO:0032553;GO:0032555;GO:0032559	nucleotide binding;nucleoside binding;purine nucleoside binding;catalytic activity;binding;ATP binding;pyrophosphatase activity;hydrolase activity;hydrolase activity, acting on acid anhydrides			mmu:108888				66.741	591
IPI00387185	IPI00387185	Cysteine protease ATG4B;Autophagy-related protein 4 homolog B;Autophagin-1;Autophagy-related cysteine endopeptidase 1;AUT-like 1 cysteine endopeptidase	Atg4b;Apg4b;Autl1;Kiaa0943	Cysteine protease ATG4B	2	2	2	-1.45409	0.0381065	-1.1949	-1.7744	-1.00202	-1.71329	45	12	Q8BGE6;Q3UNF6	ATG4B_MOUSE	ENSMUST00000027502	OTTMUSP00000043366	MGI:1913865	NP_777363	PF03416	Peptidase_C54	Peptidase family C54	GO:0005737;GO:0005875;GO:0032991;GO:0043234;GO:0044422;GO:0044424;GO:0044430;GO:0044446;GO:0044464	cytoplasm;microtubule associated complex;macromolecular complex;protein complex;organelle part;intracellular part;cytoskeletal part;intracellular organelle part;cell part	GO:0003824;GO:0004175;GO:0004197;GO:0005488;GO:0005515;GO:0008017;GO:0008092;GO:0008233;GO:0008234;GO:0015631;GO:0016787;GO:0070011	catalytic activity;endopeptidase activity;cysteine-type endopeptidase activity;binding;protein binding;microtubule binding;cytoskeletal protein binding;peptidase activity;cysteine-type peptidase activity;tubulin binding;hydrolase activity	GO:0006508;GO:0006605;GO:0006623;GO:0006810;GO:0006886;GO:0006914;GO:0007034;GO:0008152;GO:0009056;GO:0009057;GO:0009987;GO:0015031;GO:0019538;GO:0019941;GO:0030163;GO:0034960;GO:0034962;GO:0043170;GO:0043283;GO:0043285;GO:0043632;GO:0044237;GO:0044238;GO:0044248;GO:0044257;GO:0044260;GO:0044265;GO:0044267;GO:0045184;GO:0046907;GO:0051234;GO:0051603;GO:0051649	proteolysis;protein targeting;protein targeting to vacuole;transport;intracellular protein transport;autophagy;vacuolar transport;metabolic process;catabolic process;macromolecule catabolic process;cellular process;protein transport					44.375	393
IPI00133240	IPI00133240	Cytochrome b-c1 complex subunit Rieske, mitochondrial;Ubiquinol-cytochrome c reductase iron-sulfur subunit;Rieske iron-sulfur protein;Complex III subunit 5;Cytochrome b-c1 complex subunit 11;Ubiquinol-cytochrome c reductase 8 kDa protein;Complex III subunit IX	Uqcrfs1	Cytochrome b-c1 complex subunit Rieske, mitochondrial	2	2	1	-1.45347	0.0381705	-0.603465	-2.77662	-0.933343	-1.97359	27	27	Q9CR68	UCRI_MOUSE	ENSMUST00000042834	OTTMUSP00000000615	MGI:1913944	NP_079986	PF00355;PF09165;PF02921	Rieske;Ubiq-Cytc-red_N;UCR_TM	Rieske [2Fe-2S] domain;Ubiquinol-cytochrome c reductase 8 kDa, N-terminal;Ubiquinol cytochrome reductase transmembrane region	GO:0005743;GO:0016020;GO:0016021;GO:0019866;GO:0031090;GO:0031224;GO:0031966;GO:0044422;GO:0044424;GO:0044425;GO:0044429;GO:0044444;GO:0044446;GO:0044464;GO:0070469	mitochondrial inner membrane;membrane;integral to membrane;organelle inner membrane;organelle membrane;intrinsic to membrane;mitochondrial membrane;organelle part;intracellular part;membrane part;mitochondrial part;cytoplasmic part	GO:0003824;GO:0005215;GO:0005488;GO:0005506;GO:0008121;GO:0008324;GO:0009055;GO:0015075;GO:0015077;GO:0015078;GO:0016491;GO:0016679;GO:0016681;GO:0022857;GO:0022890;GO:0022891;GO:0022892;GO:0043167;GO:0043169;GO:0046872;GO:0046914;GO:0051536;GO:0051537;GO:0051540	catalytic activity;transporter activity;binding;iron ion binding;ubiquinol-cytochrome-c reductase activity;cation transmembrane transporter activity;electron carrier activity;ion transmembrane transporter activity	GO:0006091;GO:0006810;GO:0008152;GO:0009987;GO:0022900;GO:0044237;GO:0051234;GO:0055114	generation of precursor metabolites and energy;transport;metabolic process;cellular process;electron transport chain;cellular metabolic process;establishment of localization;oxidation reduction	mmu:66694	ko00190;ko04260;ko05010;ko05012;ko05016	Oxidative phosphorylation;Cardiac muscle contraction;Alzheimer's disease;Parkinson's disease;Huntington's disease	K00411	29.367	274
IPI00122549	IPI00122549;IPI00230540;IPI00857067	Voltage-dependent anion-selective channel protein 1;Voltage-dependent anion-selective channel protein 5;Outer mitochondrial membrane protein porin 1;Plasmalemmal porin	Vdac1;Vdac5	Isoform Pl-VDAC1 of Voltage-dependent anion-selective channel protein 1;Isoform Mt-VDAC1 of Voltage-dependent anion-selective channel protein 1	4	4	2	-1.45307	0.038211	-1.26014	-2.23983	-0.815381	-1.646	108	90	Q60932-1;Q60932;Q3THL7;Q3TIG8;Q3U6K8;Q60932-2	VDAC1_MOUSE	ENSMUST00000020673;ENSMUST00000109065	OTTMUSP00000021749;OTTMUSP00000005805	MGI:106919;MGI:106919	NP_035824	PF01459	Porin_3	Eukaryotic porin	GO:0005741;GO:0005743;GO:0005886;GO:0016020;GO:0016021;GO:0019866;GO:0019867;GO:0031090;GO:0031224;GO:0031966;GO:0031968;GO:0044422;GO:0044424;GO:0044425;GO:0044429;GO:0044444;GO:0044446;GO:0044464	mitochondrial outer membrane;mitochondrial inner membrane;plasma membrane;membrane;integral to membrane;organelle inner membrane;outer membrane;organelle membrane;intrinsic to membrane;mitochondrial membrane;organelle outer membrane;organelle part	GO:0000166;GO:0005215;GO:0005216;GO:0005244;GO:0005253;GO:0005488;GO:0008308;GO:0008509;GO:0015075;GO:0015267;GO:0022803;GO:0022832;GO:0022836;GO:0022838;GO:0022857;GO:0022891;GO:0022892	nucleotide binding;transporter activity;ion channel activity;voltage-gated ion channel activity;anion channel activity;binding;voltage-gated anion channel activity;anion transmembrane transporter activity;ion transmembrane transporter activity	GO:0001662;GO:0002209;GO:0003008;GO:0006810;GO:0006811;GO:0006820;GO:0006915;GO:0006950;GO:0006952;GO:0007154;GO:0007267;GO:0007268;GO:0007270;GO:0007610;GO:0007611;GO:0007612;GO:0008219;GO:0009987;GO:0012501;GO:0016265;GO:0032501;GO:0033555;GO:0042596;GO:0050877;GO:0050890;GO:0050896;GO:0051234	behavioral fear response;behavioral defense response;system process;transport;ion transport;anion transport;apoptosis;response to stress;defense response;cell communication;cell-cell signaling;synaptic transmission;nerve-nerve synaptic transmission					32.351	296
IPI00118237	IPI00118237;IPI00720216;IPI00338458	39S ribosomal protein L1, mitochondrial;Putative uncharacterized protein	Mrpl1	39S ribosomal protein L1, mitochondrial;mitochondrial ribosomal protein L1 isoform 2	4	3	4	-1.45293	0.0382252	-1.47377	-1.4321	-1.48878	-1.29236	36	18	Q99N96;Q9CUL8;Q9D3F3	RM01_MOUSE;Q9CUL8_MOUSE	ENSMUST00000036437;ENSMUST00000117766;ENSMUST00000121477	OTTMUSP00000032867;OTTMUSP00000032868	MGI:2137202;MGI:2137202	NP_444388;NP_001034173	PF00687	Ribosomal_L1	Ribosomal protein L1p/L10e family	GO:0000315;GO:0005762;GO:0015934;GO:0030529;GO:0032991;GO:0033279;GO:0044422;GO:0044424;GO:0044429;GO:0044444;GO:0044446;GO:0044464	organellar large ribosomal subunit;mitochondrial large ribosomal subunit;large ribosomal subunit;ribonucleoprotein complex;macromolecular complex;ribosomal subunit;organelle part;intracellular part;mitochondrial part;cytoplasmic part	GO:0003676;GO:0003723;GO:0003735;GO:0005198;GO:0005488	nucleic acid binding;RNA binding;structural constituent of ribosome;structural molecule activity;binding	GO:0006139;GO:0006396;GO:0006412;GO:0006807;GO:0008152;GO:0009058;GO:0009059;GO:0009987;GO:0016070;GO:0019538;GO:0034645;GO:0034960;GO:0034961;GO:0043170;GO:0043283;GO:0043284;GO:0044237;GO:0044238;GO:0044249;GO:0044260;GO:0044267	nucleobase, nucleoside, nucleotide and nucleic acid metabolic process;RNA processing;translation;nitrogen compound metabolic process;metabolic process;biosynthetic process;macromolecule biosynthetic process;cellular process;RNA metabolic process	mmu:94061				37.596	336
IPI00230241	IPI00230241	ATP synthase subunit epsilon, mitochondrial	Atp5e	ATP synthase subunit epsilon, mitochondrial	5	5	1	-1.4496	0.0385682	-1.56597	-1.71575	-1.33323	-0.800285	45	36	P56382;Q545F5;Q6VEU5	ATP5E_MOUSE	ENSMUST00000016396	OTTMUSP00000017794	MGI:1855697	NP_080259	PF04627	ATP-synt_Eps	Mitochondrial ATP synthase epsilon chain	GO:0000275;GO:0032991;GO:0033178;GO:0043234;GO:0044422;GO:0044424;GO:0044425;GO:0044429;GO:0044444;GO:0044446;GO:0044455;GO:0044464;GO:0045261	mitochondrial proton-transporting ATP synthase complex, catalytic core F(1);macromolecular complex;proton-transporting two-sector ATPase complex, catalytic domain;protein complex;organelle part;intracellular part;membrane part;mitochondrial part	GO:0003824;GO:0005215;GO:0008324;GO:0015075;GO:0015077;GO:0015078;GO:0015399;GO:0015405;GO:0016462;GO:0016787;GO:0016817;GO:0016818;GO:0016820;GO:0016887;GO:0017111;GO:0019829;GO:0022804;GO:0022857;GO:0022890;GO:0022891;GO:0022892;GO:0042623;GO:0042625;GO:0042626;GO:0043492;GO:0046933;GO:0046961	catalytic activity;transporter activity;cation transmembrane transporter activity;ion transmembrane transporter activity;monovalent inorganic cation transmembrane transporter activity;hydrogen ion transmembrane transporter activity	GO:0006139;GO:0006163;GO:0006164;GO:0006753;GO:0006754;GO:0006807;GO:0006810;GO:0006811;GO:0006812;GO:0006818;GO:0008152;GO:0009058;GO:0009117;GO:0009141;GO:0009142;GO:0009144;GO:0009145;GO:0009150;GO:0009152;GO:0009165;GO:0009199;GO:0009201;GO:0009205;GO:0009206;GO:0009259;GO:0009260;GO:0009987;GO:0015672;GO:0015985;GO:0015986;GO:0015992;GO:0034220;GO:0044237;GO:0044238;GO:0044249;GO:0046034;GO:…	nucleobase, nucleoside, nucleotide and nucleic acid metabolic process;purine nucleotide metabolic process;purine nucleotide biosynthetic process;nucleoside phosphate metabolic process;ATP biosynthetic process;nitrogen compound metabolic process;transport	mmu:67126	ko00190;ko05010;ko05012;ko05016	Oxidative phosphorylation;Alzheimer's disease;Parkinson's disease;Huntington's disease	K02135	5.8378	52
IPI00116613	IPI00116613;IPI00849282;IPI00473868	CCAAT/enhancer-binding protein beta;Interleukin-6-dependent-binding protein;Liver-enriched transcriptional activator;AGP/EBP	Cebpb	CCAAT/enhancer-binding protein beta	4	4	3	-1.4381	0.0397712	-1.48275	-1.42406	-1.26411	-1.45213	96	51	P28033;Q3UPN9	CEBPB_MOUSE	ENSMUST00000070642	OTTMUSP00000017503	MGI:88373	NP_034013	PF07716	bZIP_2	Basic region leucine zipper	GO:0005634;GO:0005737;GO:0043226;GO:0043227;GO:0043229;GO:0043231;GO:0044424;GO:0044464	nucleus;cytoplasm;organelle;membrane-bounded organelle;intracellular organelle;intracellular membrane-bounded organelle;intracellular part;cell part	GO:0003676;GO:0003677;GO:0003700;GO:0003702;GO:0003705;GO:0005488;GO:0005515;GO:0016563;GO:0030528;GO:0042802;GO:0042803;GO:0043565;GO:0046982;GO:0046983	nucleic acid binding;DNA binding;transcription factor activity;RNA polymerase II transcription factor activity;RNA polymerase II transcription factor activity, enhancer binding;binding;protein binding;transcription activator activity	GO:0001817;GO:0001892;GO:0006139;GO:0006350;GO:0006355;GO:0006357;GO:0006807;GO:0006916;GO:0006917;GO:0008152;GO:0009058;GO:0009059;GO:0009889;GO:0009891;GO:0009893;GO:0009987;GO:0010468;GO:0010556;GO:0010557;GO:0010604;GO:0010628;GO:0010941;GO:0010942;GO:0012502;GO:0019219;GO:0019222;GO:0030154;GO:0030182;GO:0031323;GO:0031325;GO:0031326;GO:0031328;GO:0032502;GO:0032675;GO:0034645;GO:0034960;GO:…	regulation of cytokine production;embryonic placenta development;nucleobase, nucleoside, nucleotide and nucleic acid metabolic process;transcription;regulation of transcription, DNA-dependent;regulation of transcription from RNA polymerase II promoter	mmu:12608			K10048	31.445	296
IPI00223634	IPI00223634	Ankyrin repeat-containing protein C20orf12 homolog	6330439K17Rik	6330439K17Rik protein	2	2	2	-1.43735	0.0398505	-1.55367	-1.40306	-1.47164	-1.09518	507	321	Q8C008;B2RUH8;B7ZNV9;Q5FWA4	CT012_MOUSE	ENSMUST00000081982	OTTMUSP00000004639	MGI:2139080	NP_766447	PF00023	Ank	Ankyrin repeat	GO:0005622;GO:0044464	intracellular;cell part	GO:0005488;GO:0008270;GO:0043167;GO:0043169;GO:0046872;GO:0046914	binding;zinc ion binding;ion binding;cation binding;metal ion binding;transition metal ion binding			mmu:241688				86.471	792
IPI00894884	IPI00894884;IPI00342382;IPI00280255;IPI00929896;IPI00895176;IPI00649479;IPI00895478	Exosome component 10;Polymyositis/scleroderma autoantigen 2 homolog;Autoantigen PM/Scl 2 homolog;Exosc10 protein	Exosc10;RP23-331P21.1-001;Pmscl2;RP23-331P21.1-005;RP23-331P21.1-002	exosome component 10;Exosome component 10;Exosome component 10;Exosome component 10;Exosome component 10;Exosome component 10;Exosome component 10	7	7	6	-1.43116	0.0405115	-1.21703	-1.58987	-1.33769	-1.52462	66	36	B1ARY9;Q8R2R0;Q9CVF6;P56960;Q3UNK6;Q8K366;B2KFQ9;Q99KY7;B2KFR0;Q9R0B0;B1AVQ3;Q3TRD0;Q9CYJ3;B2KG00	B1ARY9_MOUSE;EXOSX_MOUSE;Q8K366_MOUSE;B2KFQ9_MOUSE;B2KFR0_MOUSE;B1AVQ3_MOUSE;B2KG00_MOUSE	ENSMUST00000017408;ENSMUST00000076022;ENSMUST00000097781	OTTMUSP00000011757;OTTMUSP00000011760;OTTMUSP00000042800;OTTMUSP00000042802;OTTMUSP00000011758;OTTMUSP00000042801	MGI:1355322;MGI:1355322;MGI:1355322;MGI:1355322;MGI:1355322;MGI:1355322	NP_057908	PF01612;PF00570;PF08066	3_5_exonuc;HRDC;PMC2NT	3'-5' exonuclease;HRDC domain;PMC2NT (NUC016) domain	GO:0000176;GO:0000178;GO:0032991;GO:0043234;GO:0044422;GO:0044424;GO:0044428;GO:0044446;GO:0044464;GO:0005730;GO:0005737;GO:0043226;GO:0043228;GO:0043229;GO:0043232	nuclear exosome (RNase complex);exosome (RNase complex);macromolecular complex;protein complex;organelle part;intracellular part;nuclear part;intracellular organelle part;cell part;nucleolus;cytoplasm;organelle;non-membrane-bounded organelle	GO:0003676;GO:0003824;GO:0004518;GO:0004527;GO:0005488;GO:0008408;GO:0016787;GO:0016788;GO:0003723	nucleic acid binding;catalytic activity;nuclease activity;exonuclease activity;binding;3'-5' exonuclease activity;hydrolase activity;hydrolase activity, acting on ester bonds;RNA binding	GO:0006139;GO:0006396;GO:0006807;GO:0008152;GO:0009987;GO:0016070;GO:0034960;GO:0043170;GO:0043283;GO:0044237;GO:0044238;GO:0044260;GO:0000184;GO:0000956;GO:0006364;GO:0006401;GO:0006402;GO:0009056;GO:0009057;GO:0016071;GO:0016072;GO:0034470;GO:0034660;GO:0034962;GO:0043285;GO:0044248;GO:0044265	nucleobase, nucleoside, nucleotide and nucleic acid metabolic process;RNA processing;nitrogen compound metabolic process;metabolic process;cellular process;RNA metabolic process;cellular biopolymer metabolic process;macromolecule metabolic process	mmu:50912				100.94	887
IPI00132578	IPI00132578;IPI00649024;IPI00848436;IPI00461025	mRNA turnover protein 4 homolog;MRT4, mRNA turnover 4, homolog (S. cerevisiae);RIKEN cDNA 2610012O22, isoform CRA_a	Mrto4;Mrt4;2610012O22Rik;RP23-247I1.8-002;mCG_122343	mRNA turnover protein 4 homolog;RIKEN cDNA 2610012O22, isoform CRA_a	5	4	3	-1.42648	0.0410166	-1.47423	-1.37873	-1.66228	-0.759435	57	45	Q9D0I8;A2AMU9;A2AMV1	MRT4_MOUSE;A2AMV1_MOUSE	ENSMUST00000102503;ENSMUST00000030513	OTTMUSP00000010544;OTTMUSP00000010545	MGI:1917152;MGI:1917152	NP_076025	PF00466	Ribosomal_L10	Ribosomal protein L10	GO:0005730;GO:0043226;GO:0043228;GO:0043229;GO:0043232;GO:0044422;GO:0044424;GO:0044428;GO:0044446;GO:0044464;GO:0005622	nucleolus;organelle;non-membrane-bounded organelle;intracellular organelle;intracellular non-membrane-bounded organelle;organelle part;intracellular part;nuclear part;intracellular organelle part;cell part;intracellular			GO:0009987;GO:0022613;GO:0042254;GO:0044085	cellular process;ribonucleoprotein complex biogenesis;ribosome biogenesis;cellular component biogenesis	mmu:69902				27.545	239
IPI00120719	IPI00120719	Cytochrome c oxidase subunit 5A, mitochondrial;Cytochrome c oxidase polypeptide Va	Cox5a	Cytochrome c oxidase subunit 5A, mitochondrial	6	6	4	-1.41995	0.041731	-1.05069	-1.78921	-0.817101	-2.08513	36	21	P12787	COX5A_MOUSE	ENSMUST00000000090		MGI:88474	NP_031773	PF02284	COX5A	Cytochrome c oxidase subunit Va	GO:0005743;GO:0016020;GO:0019866;GO:0031090;GO:0031966;GO:0044422;GO:0044424;GO:0044429;GO:0044444;GO:0044446;GO:0044464	mitochondrial inner membrane;membrane;organelle inner membrane;organelle membrane;mitochondrial membrane;organelle part;intracellular part;mitochondrial part;cytoplasmic part;intracellular organelle part;cell part	GO:0003824;GO:0004129;GO:0005215;GO:0005488;GO:0005506;GO:0008324;GO:0015002;GO:0015075;GO:0015077;GO:0015078;GO:0016491;GO:0016675;GO:0016676;GO:0022857;GO:0022890;GO:0022891;GO:0022892;GO:0043167;GO:0043169;GO:0046872;GO:0046914	catalytic activity;cytochrome-c oxidase activity;transporter activity;binding;iron ion binding;cation transmembrane transporter activity;heme-copper terminal oxidase activity;ion transmembrane transporter activity			mmu:12858	ko00190;ko04260;ko05010;ko05012;ko05016	Oxidative phosphorylation;Cardiac muscle contraction;Alzheimer's disease;Parkinson's disease;Huntington's disease	K02264	16.101	146
IPI00867847	IPI00867847;IPI00124479;IPI00127135;IPI00881982;IPI00136775	Kinesin-like protein KIF2A	Kif2a;Kif2;Kns2	Isoform 2 of Kinesin-like protein KIF2A;Isoform 1 of Kinesin-like protein KIF2A;Isoform 3 of Kinesin-like protein KIF2A;75 kDa protein	12	11	7	-1.41893	0.0418431	-1.46054	-1.46315	-1.37732	-1.29038	21	3	P28740-2;P28740;P28740-1;P28740-3	KIF2A_MOUSE	ENSMUST00000022204;ENSMUST00000042181;ENSMUST00000122233	OTTMUSP00000037550;OTTMUSP00000037546;OTTMUSP00000037545;OTTMUSP00000037549	MGI:108390;MGI:108390;MGI:108390	NP_032468;NP_001139251	PF00225	Kinesin	Kinesin motor domain	GO:0000323;GO:0005764;GO:0005773;GO:0005813;GO:0005815;GO:0005874;GO:0043226;GO:0043227;GO:0043228;GO:0043229;GO:0043231;GO:0043232;GO:0044422;GO:0044424;GO:0044430;GO:0044444;GO:0044446;GO:0044464	lytic vacuole;lysosome;vacuole;centrosome;microtubule organizing center;microtubule;organelle;membrane-bounded organelle;non-membrane-bounded organelle;intracellular organelle;intracellular membrane-bounded organelle	GO:0000166;GO:0001882;GO:0001883;GO:0003774;GO:0003777;GO:0003824;GO:0005488;GO:0005524;GO:0016462;GO:0016787;GO:0016817;GO:0016818;GO:0017076;GO:0017111;GO:0030554;GO:0032553;GO:0032555;GO:0032559	nucleotide binding;nucleoside binding;purine nucleoside binding;motor activity;microtubule motor activity;catalytic activity;binding;ATP binding;pyrophosphatase activity;hydrolase activity;hydrolase activity, acting on acid anhydrides	GO:0007017;GO:0007018;GO:0007399;GO:0009987;GO:0030154;GO:0032502;GO:0048731;GO:0048856;GO:0048869	microtubule-based process;microtubule-based movement;nervous system development;cellular process;cell differentiation;developmental process;system development;anatomical structure development;cellular developmental process	mmu:16563			K10393	74.844	659
IPI00133399	IPI00133399	NADH dehydrogenase [ubiquinone] 1 alpha subcomplex subunit 6;NADH-ubiquinone oxidoreductase B14 subunit;Complex I-B14	Ndufa6	NADH dehydrogenase [ubiquinone] 1 alpha subcomplex subunit 6	5	5	4	-1.41526	0.0422492	-1.1751	-1.37571	-1.45481	-1.46601	6	3	Q9CQZ5	NDUA6_MOUSE	ENSMUST00000023085		MGI:1914380	NP_080263	PF05347	Complex1_LYR	Complex 1 protein (LYR family)	GO:0005743;GO:0016020;GO:0019866;GO:0031090;GO:0031966;GO:0044422;GO:0044424;GO:0044425;GO:0044429;GO:0044444;GO:0044446;GO:0044464;GO:0070469	mitochondrial inner membrane;membrane;organelle inner membrane;organelle membrane;mitochondrial membrane;organelle part;intracellular part;membrane part;mitochondrial part;cytoplasmic part;intracellular organelle part;cell part;respiratory chain			GO:0006091;GO:0006810;GO:0008152;GO:0009987;GO:0022900;GO:0044237;GO:0051234;GO:0055114	generation of precursor metabolites and energy;transport;metabolic process;cellular process;electron transport chain;cellular metabolic process;establishment of localization;oxidation reduction	mmu:67130	ko00190;ko05010;ko05012;ko05016	Oxidative phosphorylation;Alzheimer's disease;Parkinson's disease;Huntington's disease	K03950	15.283	131
IPI00480432	IPI00480432;IPI00230238	MKIAA0857 protein;Rab11 family-interacting protein 5;Rab11-interacting protein Rip11	Rab11fip5;mKIAA0857;D6Ertd32e;Rip11	RAB11 family interacting protein 5 (class I) isoform 1;Rab11 family-interacting protein 5	2	2	2	-1.40969	0.0428727	-1.30996	-1.65017	-1.50941	-0.481603	45	36	Q6ZQ33;Q8R361;Q3UM85	Q6ZQ33_MOUSE;RFIP5_MOUSE	ENSMUST00000089579;ENSMUST00000060837		MGI:1098586;MGI:1098586	NP_001003955;NP_803417	PF00168;PF09457	C2;RBD-FIP	C2 domain;FIP domain	GO:0005741;GO:0010008;GO:0016020;GO:0019867;GO:0031090;GO:0031966;GO:0031968;GO:0044422;GO:0044424;GO:0044429;GO:0044440;GO:0044444;GO:0044446;GO:0044464;GO:0055038	mitochondrial outer membrane;endosome membrane;membrane;outer membrane;organelle membrane;mitochondrial membrane;organelle outer membrane;organelle part;intracellular part;mitochondrial part;endosomal part;cytoplasmic part;intracellular organelle part	GO:0005488;GO:0005515;GO:0008092;GO:0015631;GO:0043015	binding;protein binding;cytoskeletal protein binding;tubulin binding;gamma-tubulin binding	GO:0006810;GO:0015031;GO:0045184;GO:0051234	transport;protein transport;establishment of protein localization;establishment of localization	mmu:52055				139.55	1318
IPI00132723	IPI00132723;IPI00387489	Exosome complex exonuclease RRP42;Ribosomal RNA-processing protein 42;Exosome component 7;MCG23310, isoform CRA_b	Exosc7;Rrp42;mCG_23310	Exosome complex exonuclease RRP42;MCG23310, isoform CRA_b	5	5	4	-1.40507	0.0433952	-1.29335	-1.52342	-1.23426	-1.51679	18	15	Q9D0M0;Q4VBW5;Q6ZQJ0;Q7TMX6	EXOS7_MOUSE;Q4VBW5_MOUSE	ENSMUST00000026891		MGI:1913696;MGI:1913696	NP_001074657	PF01138;PF03725	RNase_PH;RNase_PH_C	3' exoribonuclease family, domain 1;3' exoribonuclease family, domain 2	GO:0000178;GO:0005730;GO:0032991;GO:0043226;GO:0043228;GO:0043229;GO:0043232;GO:0043234;GO:0044422;GO:0044424;GO:0044428;GO:0044446;GO:0044464	exosome (RNase complex);nucleolus;macromolecular complex;organelle;non-membrane-bounded organelle;intracellular organelle;intracellular non-membrane-bounded organelle;protein complex;organelle part;intracellular part;nuclear part	GO:0000175;GO:0003676;GO:0003723;GO:0003824;GO:0004518;GO:0004527;GO:0004532;GO:0004540;GO:0005488;GO:0008408;GO:0016787;GO:0016788;GO:0016796;GO:0016896;GO:0005515	3'-5'-exoribonuclease activity;nucleic acid binding;RNA binding;catalytic activity;nuclease activity;exonuclease activity;exoribonuclease activity;ribonuclease activity;binding;3'-5' exonuclease activity;hydrolase activity	GO:0006139;GO:0006364;GO:0006396;GO:0006807;GO:0008152;GO:0009987;GO:0016070;GO:0016072;GO:0034470;GO:0034660;GO:0034960;GO:0043170;GO:0043283;GO:0044237;GO:0044238;GO:0044260	nucleobase, nucleoside, nucleotide and nucleic acid metabolic process;rRNA processing;RNA processing;nitrogen compound metabolic process;metabolic process;cellular process;RNA metabolic process;rRNA metabolic process;ncRNA processing	mmu:66446			K01149	31.665	291
IPI00938448	IPI00938448;IPI00116898;IPI00669209;IPI00650024	Guanine nucleotide binding protein-like 2 (Nucleolar);Nucleolar GTP-binding protein 2	Gnl2;RP23-325M14.4-001;RP23-325M14.4-002	guanine nucleotide binding protein-like 2;Nucleolar GTP-binding protein 2;similar to guanine nucleotide binding protein-like 2;Guanine nucleotide binding protein-like 2	2	2	1	-1.4042	0.0434944	-1.43094	-1.37745	-1.55217	-0.433954	6	3	B1ASC3;P70410;Q3UJL0;Q3V3N5;Q99LH1;B1ASC2	B1ASC3_MOUSE;NOG2_MOUSE;B1ASC2_MOUSE	ENSMUST00000030684;ENSMUST00000106176	OTTMUSP00000009597;OTTMUSP00000009598	MGI:2385207;MGI:2385207	NP_663527;XP_913632	PF01926;PF08153	MMR_HSR1;NGP1NT	GTPase of unknown function;NGP1NT (NUC091) domain	GO:0005622;GO:0044464;GO:0005730;GO:0043226;GO:0043228;GO:0043229;GO:0043232;GO:0044422;GO:0044424;GO:0044428;GO:0044446	intracellular;cell part;nucleolus;organelle;non-membrane-bounded organelle;intracellular organelle;intracellular non-membrane-bounded organelle;organelle part;intracellular part;nuclear part;intracellular organelle part	GO:0000166;GO:0005488;GO:0005525;GO:0017076;GO:0019001;GO:0032553;GO:0032555;GO:0032561;GO:0005515	nucleotide binding;binding;GTP binding;purine nucleotide binding;guanyl nucleotide binding;ribonucleotide binding;purine ribonucleotide binding;guanyl ribonucleotide binding;protein binding	GO:0009987;GO:0022613;GO:0042254;GO:0044085	cellular process;ribonucleoprotein complex biogenesis;ribosome biogenesis;cellular component biogenesis	mmu:230737				83.345	728
IPI00222547	IPI00222547;IPI00473429;IPI00620288;IPI00885498	60S ribosomal protein L28	Rpl28	60S ribosomal protein L28;similar to ribosomal protein L28;similar to ribosomal protein L28	14	13	11	-1.4005	0.0439171	-1.54796	-1.23482	-1.33614	-1.46485	507	321	P41105;Q5M9J8;Q5M9N5	RL28_MOUSE	ENSMUST00000032597;ENSMUST00000078432	OTTMUSP00000026507;OTTMUSP00000026508	MGI:101839	NP_033107;XP_001478143;XP_001479100;XP_001473974;XP_001480132;XP_001473760;XP_001476913	PF01778	Ribosomal_L28e	Ribosomal L28e protein family	GO:0005840;GO:0030529;GO:0032991;GO:0043226;GO:0043228;GO:0043229;GO:0043232;GO:0044424;GO:0044444;GO:0044464	ribosome;ribonucleoprotein complex;macromolecular complex;organelle;non-membrane-bounded organelle;intracellular organelle;intracellular non-membrane-bounded organelle;intracellular part;cytoplasmic part;cell part	GO:0003735;GO:0005198	structural constituent of ribosome;structural molecule activity	GO:0006412;GO:0008152;GO:0009058;GO:0009059;GO:0009987;GO:0019538;GO:0034645;GO:0034960;GO:0034961;GO:0043170;GO:0043283;GO:0043284;GO:0044237;GO:0044238;GO:0044249;GO:0044260;GO:0044267	translation;metabolic process;biosynthetic process;macromolecule biosynthetic process;cellular process;protein metabolic process;cellular macromolecule biosynthetic process;cellular biopolymer metabolic process;cellular biopolymer biosynthetic process	mmu:100042670;mmu:100047349;mmu:19943	ko03010	Ribosome	K02903	15.733	137
IPI00114162	IPI00114162;IPI00876563;IPI00890241;IPI00378311	Fatty acid-binding protein, epidermal;E-FABP;Fatty acid-binding protein 5;Psoriasis-associated fatty acid-binding protein homolog;Keratinocyte lipid-binding protein;Putative uncharacterized protein	Fabp5;Fabpe;Klbp;Mal1	Fatty acid-binding protein, epidermal;Putative uncharacterized protein;12 kDa protein	16	16	12	-1.39847	0.0441507	-1.46925	-1.263	-1.63914	-1.32768	15	24	Q05816;Q497I3;Q3TLH6	FABP5_MOUSE;Q3TLH6_MOUSE	ENSMUST00000029046	OTTMUSP00000038483	MGI:101790;MGI:101790	NP_034764	PF00061	Lipocalin	Lipocalin / cytosolic fatty-acid binding protein family	GO:0005737;GO:0044424;GO:0044464	cytoplasm;intracellular part;cell part	GO:0005215;GO:0005488;GO:0008289	transporter activity;binding;lipid binding	GO:0005975;GO:0005996;GO:0006006;GO:0006066;GO:0006519;GO:0006575;GO:0006576;GO:0006629;GO:0006644;GO:0006650;GO:0006656;GO:0006807;GO:0006810;GO:0008152;GO:0008610;GO:0008643;GO:0008645;GO:0008654;GO:0009058;GO:0009308;GO:0009987;GO:0015749;GO:0015758;GO:0019318;GO:0019637;GO:0042439;GO:0044237;GO:0044238;GO:0044249;GO:0044255;GO:0045017;GO:0046470;GO:0046474;GO:0046486;GO:0051234	carbohydrate metabolic process;monosaccharide metabolic process;glucose metabolic process;alcohol metabolic process;cellular amino acid and derivative metabolic process;cellular amino acid derivative metabolic process;biogenic amine metabolic process	mmu:16592	ko03320	PPAR signaling pathway	K08754	15.137	135
IPI00115896	IPI00115896;IPI00755426;IPI00117448;IPI00831392	28S ribosomal protein S21, mitochondrial;S21mt;MRP-S21	Mrps21;Rpms21	28S ribosomal protein S21, mitochondrial;similar to mitochondrial ribosomal protein S21;similar to mitochondrial ribosomal protein S21;5 kDa protein	2	2	2	-1.39634	0.0443959	-1.30208	-1.60899	-1.49061	-0.897124	58	33	P58059;Q059G7	RT21_MOUSE	ENSMUST00000067298	OTTMUSP00000025001;OTTMUSP00000025002	MGI:1913542	NP_510964;XP_890261;XP_909763;XP_896266;XP_916948				GO:0005743;GO:0005840;GO:0016020;GO:0019866;GO:0030529;GO:0031090;GO:0031966;GO:0032991;GO:0043226;GO:0043228;GO:0043229;GO:0043232;GO:0044422;GO:0044424;GO:0044429;GO:0044444;GO:0044446;GO:0044464	mitochondrial inner membrane;ribosome;membrane;organelle inner membrane;ribonucleoprotein complex;organelle membrane;mitochondrial membrane;macromolecular complex;organelle;non-membrane-bounded organelle;intracellular organelle	GO:0003735;GO:0005198	structural constituent of ribosome;structural molecule activity	GO:0006412;GO:0008152;GO:0009058;GO:0009059;GO:0009987;GO:0019538;GO:0034645;GO:0034960;GO:0034961;GO:0043170;GO:0043283;GO:0043284;GO:0044237;GO:0044238;GO:0044249;GO:0044260;GO:0044267	translation;metabolic process;biosynthetic process;macromolecule biosynthetic process;cellular process;protein metabolic process;cellular macromolecule biosynthetic process;cellular biopolymer metabolic process;cellular biopolymer biosynthetic process	mmu:66292				10.561	87
IPI00114416	IPI00114416;IPI00331692	3,2-trans-enoyl-CoA isomerase, mitochondrial;Dodecenoyl-CoA isomerase;Delta(3),Delta(2)-enoyl-CoA isomerase;Dci protein;Dodecenoyl-Coenzyme A delta isomerase (3,2 trans-enoyl-Coenyme A isomerase);Putative uncharacterized protein	Dci;mCG_12836	3,2-trans-enoyl-CoA isomerase, mitochondrial;dodecenoyl-Coenzyme A delta isomerase precursor	3	3	3	-1.39247	0.0448465	-1.10119	-2.26418	-0.622517	-1.68374	12	24	P42125;Q8QZV3;Q9DBN7	D3D2_MOUSE;Q8QZV3_MOUSE	ENSMUST00000024946		MGI:94871;MGI:94871	NP_034153	PF00378	ECH	Enoyl-CoA hydratase/isomerase family	GO:0005743;GO:0005759;GO:0016020;GO:0019866;GO:0031090;GO:0031966;GO:0044422;GO:0044424;GO:0044429;GO:0044444;GO:0044446;GO:0044464	mitochondrial inner membrane;mitochondrial matrix;membrane;organelle inner membrane;organelle membrane;mitochondrial membrane;organelle part;intracellular part;mitochondrial part;cytoplasmic part;intracellular organelle part;cell part	GO:0003824;GO:0004165;GO:0016853;GO:0016860;GO:0016863	catalytic activity;dodecenoyl-CoA delta-isomerase activity;isomerase activity;intramolecular oxidoreductase activity;intramolecular oxidoreductase activity, transposing C=C bonds	GO:0006082;GO:0006629;GO:0006631;GO:0006635;GO:0008152;GO:0009056;GO:0009062;GO:0009987;GO:0016042;GO:0016054;GO:0019395;GO:0019752;GO:0030258;GO:0032787;GO:0034440;GO:0042180;GO:0043436;GO:0044237;GO:0044238;GO:0044242;GO:0044248;GO:0044255;GO:0046395	organic acid metabolic process;lipid metabolic process;fatty acid metabolic process;fatty acid beta-oxidation;metabolic process;catabolic process;fatty acid catabolic process;cellular process;lipid catabolic process;organic acid catabolic process	mmu:13177	ko00071	Fatty acid metabolism	K01825	32.078	289
IPI00758084	IPI00758084;IPI00881565;IPI00850999;IPI00881712	Putative uncharacterized protein	Prdm15	PR domain containing 15;53 kDa protein	3	1	2	-1.39027	0.0451033	-1.79737	-1.46304	-1.3175	-0.918499	30	27	Q3UML7;Q5U5L4	Q3UML7_MOUSE	ENSMUST00000095849;ENSMUST00000121584	OTTMUSP00000035994;OTTMUSP00000035995	MGI:1930121	NP_659038	PF00096	zf-C2H2	Zinc finger, C2H2 type	GO:0005622;GO:0044464	intracellular;cell part	GO:0005488;GO:0008270;GO:0043167;GO:0043169;GO:0046872;GO:0046914	binding;zinc ion binding;ion binding;cation binding;metal ion binding;transition metal ion binding							132.87	1174
IPI00762371	IPI00762371	UHRF1-binding protein 1-like	Uhrf1bp1l;Kiaa0701	UHRF1-binding protein 1-like	6	6	4	-1.38852	0.0453086	-1.2247	-1.27228	-1.50477	-1.69268	102	66	A2RSJ4;Q8C318;Q922V6;Q9D574	UH1BL_MOUSE	ENSMUST00000020112		MGI:2442888	NP_083442										mmu:75089				161.9	1457
IPI00116222	IPI00116222	3-hydroxyisobutyrate dehydrogenase, mitochondrial	Hibadh	3-hydroxyisobutyrate dehydrogenase, mitochondrial	7	4	7	-1.38797	0.0453741	-1.49693	-1.61127	1.89833	-1.279	30	36	Q99L13;A0ZNJ2	3HIDH_MOUSE	ENSMUST00000031788	OTTMUSP00000027438	MGI:1889802	NP_663542	PF03446	NAD_binding_2	NAD binding domain of 6-phosphogluconate dehydrogenase	GO:0005739;GO:0043226;GO:0043227;GO:0043229;GO:0043231;GO:0044424;GO:0044444;GO:0044464	mitochondrion;organelle;membrane-bounded organelle;intracellular organelle;intracellular membrane-bounded organelle;intracellular part;cytoplasmic part;cell part	GO:0000166;GO:0003824;GO:0004616;GO:0005488;GO:0008442;GO:0016491;GO:0016614;GO:0016616;GO:0048037;GO:0050662;GO:0051287	nucleotide binding;catalytic activity;phosphogluconate dehydrogenase (decarboxylating) activity;binding;3-hydroxyisobutyrate dehydrogenase activity;oxidoreductase activity;oxidoreductase activity, acting on CH-OH group of donors	GO:0005975;GO:0005996;GO:0006006;GO:0006007;GO:0006066;GO:0006082;GO:0006098;GO:0006139;GO:0006519;GO:0006520;GO:0006573;GO:0006732;GO:0006733;GO:0006739;GO:0006740;GO:0006753;GO:0006766;GO:0006767;GO:0006769;GO:0006807;GO:0008152;GO:0009056;GO:0009081;GO:0009117;GO:0009308;GO:0009820;GO:0009987;GO:0016052;GO:0019318;GO:0019320;GO:0019362;GO:0019748;GO:0019752;GO:0042180;GO:0043436;GO:0044106;GO:…	carbohydrate metabolic process;monosaccharide metabolic process;glucose metabolic process;glucose catabolic process;alcohol metabolic process;organic acid metabolic process;pentose-phosphate shunt	mmu:58875	ko00280	Valine, leucine and isoleucine degradation	K00020	35.44	335
IPI00129928	IPI00129928;IPI00759940	Fumarate hydratase, mitochondrial;EF-3	Fh;Fh1	Isoform Mitochondrial of Fumarate hydratase, mitochondrial;fumarate hydratase 1 precursor	20	19	14	-1.38651	0.045546	-1.39122	-1.3818	-1.50892	-1.28704	21	15	P97807-1;P97807;P97807-2;Q3UIA9	FUMH_MOUSE	ENSMUST00000027810	OTTMUSP00000031090	MGI:95530;MGI:95530	NP_034339	PF10415;PF00206	FumaraseC_C;Lyase_1	Fumarase C C-terminus;Lyase	GO:0005739;GO:0032991;GO:0043226;GO:0043227;GO:0043229;GO:0043231;GO:0043234;GO:0044424;GO:0044444;GO:0044464;GO:0045239	mitochondrion;macromolecular complex;organelle;membrane-bounded organelle;intracellular organelle;intracellular membrane-bounded organelle;protein complex;intracellular part;cytoplasmic part;cell part;tricarboxylic acid cycle enzyme complex	GO:0003824;GO:0004333;GO:0016829;GO:0016835;GO:0016836	catalytic activity;fumarate hydratase activity;lyase activity;carbon-oxygen lyase activity;hydro-lyase activity	GO:0001894;GO:0006082;GO:0006084;GO:0006099;GO:0006106;GO:0006732;GO:0008152;GO:0009056;GO:0009109;GO:0009987;GO:0019752;GO:0042180;GO:0042592;GO:0043436;GO:0043648;GO:0044237;GO:0044248;GO:0046356;GO:0048872;GO:0048873;GO:0051186;GO:0051187;GO:0060249;GO:0065007;GO:0065008	tissue homeostasis;organic acid metabolic process;acetyl-CoA metabolic process;tricarboxylic acid cycle;fumarate metabolic process;coenzyme metabolic process;metabolic process;catabolic process;coenzyme catabolic process;cellular process	mmu:14194	ko00020;ko00720;ko05200;ko05211	Citrate cycle (TCA cycle);Reductive carboxylate cycle (CO2 fixation);Pathways in cancer;Renal cell carcinoma	K01679	54.37	507
IPI00169521	IPI00169521;IPI00761728	ESF1 homolog;ABT1-associated protein	Esf1;Abtap	ESF1 homolog	6	5	5	-1.38583	0.0456263	-1.88332	-1.36064	-1.41102	-1.23609	30	21	Q3V1V3;A2APY6;B2RXU2;Q8BK69;Q8BM03;Q8K089;Q9D801	ESF1_MOUSE	ENSMUST00000046030	OTTMUSP00000016608	MGI:1913830	NP_001074559				GO:0005654;GO:0005730;GO:0043226;GO:0043228;GO:0043229;GO:0043232;GO:0044422;GO:0044424;GO:0044428;GO:0044446;GO:0044464	nucleoplasm;nucleolus;organelle;non-membrane-bounded organelle;intracellular organelle;intracellular non-membrane-bounded organelle;organelle part;intracellular part;nuclear part;intracellular organelle part;cell part			GO:0006139;GO:0006350;GO:0006355;GO:0006807;GO:0008152;GO:0009058;GO:0009059;GO:0009889;GO:0009987;GO:0010468;GO:0010556;GO:0019219;GO:0019222;GO:0031323;GO:0031326;GO:0034645;GO:0034960;GO:0034961;GO:0043170;GO:0043283;GO:0043284;GO:0044237;GO:0044238;GO:0044249;GO:0044260;GO:0045449;GO:0050789;GO:0050794;GO:0051171;GO:0051252;GO:0060255;GO:0065007;GO:0080090	nucleobase, nucleoside, nucleotide and nucleic acid metabolic process;transcription;regulation of transcription, DNA-dependent;nitrogen compound metabolic process;metabolic process;biosynthetic process;macromolecule biosynthetic process	mmu:66580				98.047	845
IPI00127554	IPI00127554	Probable ribosome biogenesis protein NEP1;Nucleolar protein EMG1 homolog;Protein C2f	Emg1;C2f;Grcc2f	Probable ribosome biogenesis protein NEP1	3	3	2	-1.37913	0.0464247	-1.39184	-1.48082	-1.3309	-1.36642	36	21	O35130;Q542P8	NEP1_MOUSE	ENSMUST00000004379	OTTMUSP00000027768	MGI:1315195	NP_038564	PF03587	EMG1	EMG1/NEP1 methyltransferase	GO:0005730;GO:0043226;GO:0043228;GO:0043229;GO:0043232;GO:0044422;GO:0044424;GO:0044428;GO:0044446;GO:0044464	nucleolus;organelle;non-membrane-bounded organelle;intracellular organelle;intracellular non-membrane-bounded organelle;organelle part;intracellular part;nuclear part;intracellular organelle part;cell part			GO:0006139;GO:0006364;GO:0006396;GO:0006807;GO:0008152;GO:0009987;GO:0016070;GO:0016072;GO:0034470;GO:0034660;GO:0034960;GO:0043170;GO:0043283;GO:0044237;GO:0044238;GO:0044260	nucleobase, nucleoside, nucleotide and nucleic acid metabolic process;rRNA processing;RNA processing;nitrogen compound metabolic process;metabolic process;cellular process;RNA metabolic process;rRNA metabolic process;ncRNA processing	mmu:14791				26.974	244
IPI00330362	IPI00330362;IPI00624289	Large subunit GTPase 1 homolog	Lsg1;D16Bwg1547e	Isoform 1 of Large subunit GTPase 1 homolog;Isoform 2 of Large subunit GTPase 1 homolog	2	2	2	-1.37885	0.0464581	-1.49197	-1.44008	-1.31761	-1.24157	156	96	Q3UM18-1;Q3UM18;Q3UM18-2	LSG1_MOUSE	ENSMUST00000023190;ENSMUST00000089772;ENSMUST00000117363	OTTMUSP00000034784;OTTMUSP00000034786	MGI:107236;MGI:107236	NP_835170	PF01926	MMR_HSR1	GTPase of unknown function	GO:0005783;GO:0015030;GO:0016604;GO:0043226;GO:0043227;GO:0043229;GO:0043231;GO:0044422;GO:0044424;GO:0044428;GO:0044444;GO:0044446;GO:0044451;GO:0044464	endoplasmic reticulum;Cajal body;nuclear body;organelle;membrane-bounded organelle;intracellular organelle;intracellular membrane-bounded organelle;organelle part;intracellular part;nuclear part;cytoplasmic part;intracellular organelle part	GO:0000166;GO:0003824;GO:0005488;GO:0005525;GO:0016787;GO:0017076;GO:0019001;GO:0032553;GO:0032555;GO:0032561	nucleotide binding;catalytic activity;binding;GTP binding;hydrolase activity;purine nucleotide binding;guanyl nucleotide binding;ribonucleotide binding;purine ribonucleotide binding;guanyl ribonucleotide binding	GO:0006810;GO:0006913;GO:0015031;GO:0045184;GO:0046907;GO:0051168;GO:0051169;GO:0051234;GO:0051649	transport;nucleocytoplasmic transport;protein transport;establishment of protein localization;intracellular transport;nuclear export;nuclear transport;establishment of localization;establishment of localization in cell	mmu:224092				73.156	644
IPI00221822	IPI00221822	WD repeat-containing protein 3	Wdr3	WD repeat-containing protein 3	5	5	1	-1.37847	0.0465035	-1.43798	-1.37403	-1.38291	-1.18565	507	321	Q8BHB4	WDR3_MOUSE	ENSMUST00000052120	OTTMUSP00000007383	MGI:2443143	NP_780761	PF04003;PF00400	Utp12;WD40	Dip2/Utp12 Family;WD domain, G-beta repeat	GO:0005730;GO:0030529;GO:0030684;GO:0032040;GO:0032991;GO:0043226;GO:0043228;GO:0043229;GO:0043232;GO:0044422;GO:0044424;GO:0044428;GO:0044446;GO:0044464	nucleolus;ribonucleoprotein complex;preribosome;small-subunit processome;macromolecular complex;organelle;non-membrane-bounded organelle;intracellular organelle;intracellular non-membrane-bounded organelle;organelle part;intracellular part;nuclear part			GO:0006139;GO:0006364;GO:0006396;GO:0006807;GO:0008152;GO:0009987;GO:0016070;GO:0016072;GO:0034470;GO:0034660;GO:0034960;GO:0043170;GO:0043283;GO:0044237;GO:0044238;GO:0044260	nucleobase, nucleoside, nucleotide and nucleic acid metabolic process;rRNA processing;RNA processing;nitrogen compound metabolic process;metabolic process;cellular process;RNA metabolic process;rRNA metabolic process;ncRNA processing	mmu:269470				105.77	942
IPI00467914	IPI00467914;IPI00404590	Histone H1.0;Histone H1(0);MyD196;Putative uncharacterized protein	H1f0;H1fv	Histone H1.0;Putative uncharacterized protein	5	5	2	-1.37722	0.0466543	-1.57516	-1.17927	-1.17632	-1.88197	198	176	P10922;Q3U4Y0;Q8C1Y3	H10_MOUSE;Q8C1Y3_MOUSE			MGI:95893;MGI:95893	NP_032223	PF00538	Linker_histone	linker histone H1 and H5 family	GO:0000786;GO:0005634;GO:0032991;GO:0032993;GO:0043226;GO:0043227;GO:0043229;GO:0043231;GO:0044422;GO:0044424;GO:0044427;GO:0044446;GO:0044464	nucleosome;nucleus;macromolecular complex;protein-DNA complex;organelle;membrane-bounded organelle;intracellular organelle;intracellular membrane-bounded organelle;organelle part;intracellular part;chromosomal part;intracellular organelle part;cell part	GO:0003676;GO:0003677;GO:0005488	nucleic acid binding;DNA binding;binding	GO:0006325;GO:0006334;GO:0006996;GO:0009987;GO:0010926;GO:0016043;GO:0022607;GO:0034621;GO:0034622;GO:0034728;GO:0043933;GO:0051276;GO:0065003;GO:0065004	chromatin organization;nucleosome assembly;organelle organization;cellular process;anatomical structure formation;cellular component organization;cellular component assembly;cellular macromolecular complex subunit organization	mmu:14958			K11275	20.861	194
IPI00311395	IPI00311395;IPI00648810;IPI00648527	Ethanolamine-phosphate cytidylyltransferase;Phosphorylethanolamine transferase;CTP:phosphoethanolamine cytidylyltransferase;Phosphate cytidylyltransferase 2, ethanolamine;Phosphate cytidylyltransferase 2, ethanolamine, isoform CRA_b	Pcyt2;RP23-84C12.6-002;mCG_2151;RP23-84C12.6-005	Ethanolamine-phosphate cytidylyltransferase;Phosphate cytidylyltransferase 2, ethanolamine, isoform CRA_b;Phosphate cytidylyltransferase 2, ethanolamine	10	10	5	-1.37399	0.0470439	-1.44635	-1.30164	-1.69859	-1.01099	261	222	Q922E4;Q3TLU0;Q3USD5;Q540F5;A2ABY3;Q9CTB5;A2ABY5	PCY2_MOUSE;A2ABY3_MOUSE;A2ABY5_MOUSE	ENSMUST00000026129;ENSMUST00000106188;ENSMUST00000106187	OTTMUSP00000004460;OTTMUSP00000004461;OTTMUSP00000004462	MGI:1915921;MGI:1915921;MGI:1915921	NP_077191	PF01467	CTP_transf_2	Cytidylyltransferase			GO:0003824;GO:0004306;GO:0016740;GO:0016772;GO:0016779;GO:0070567	catalytic activity;ethanolamine-phosphate cytidylyltransferase activity;transferase activity;transferase activity, transferring phosphorus-containing groups;nucleotidyltransferase activity;cytidylyltransferase activity	GO:0006629;GO:0006644;GO:0008152;GO:0008610;GO:0008654;GO:0009058;GO:0009987;GO:0019637;GO:0044237;GO:0044238;GO:0044249;GO:0044255	lipid metabolic process;phospholipid metabolic process;metabolic process;lipid biosynthetic process;phospholipid biosynthetic process;biosynthetic process;cellular process;organophosphate metabolic process;cellular metabolic process	mmu:68671	ko00564;ko00440	Glycerophospholipid metabolism;Aminophosphonate metabolism	K00967	45.234	404
IPI00319160	IPI00319160	Sjoegren syndrome/scleroderma autoantigen 1 homolog;Autoantigen p27 homolog;Protein C184L	Sssca1;C184l	Sjoegren syndrome/scleroderma autoantigen 1 homolog	9	7	8	-1.37365	0.0470854	-1.25675	-1.37067	-1.63235	-1.37663	57	51	P56873;Q545N1;Q9CZE1;Q9D002	SSA27_MOUSE	ENSMUST00000025885		MGI:1913482	NP_065237	PF06677	Auto_anti-p27	Sjogren's syndrome/scleroderma autoantigen 1 (Autoantigen p27)			GO:0005488;GO:0005515;GO:0042802	binding;protein binding;identical protein binding			mmu:56390				21.336	199
IPI00330363	IPI00330363;IPI00622160;IPI00462453;IPI00265107;IPI00354363;IPI00462006;IPI00606944;IPI00278580;IPI00850703;IPI00461356;IPI00661216;IPI00875556;IPI00848731;IPI00849924;IPI00128654;IPI00620979;IPI00849084	60S ribosomal protein L7a;Surfeit locus protein 3	Rpl7a;Surf-3;Surf3	60S ribosomal protein L7a;hypothetical protein;hypothetical protein;hypothetical protein isoform 2;hypothetical protein isoform 1;hypothetical protein;hypothetical protein;hypothetical protein	22	20	19	-1.3723	0.0472499	-1.55489	-1.30999	-1.42492	-1.31967	156	96	P12970;Q58ET1;Q5EBG5;Q6P1A9;Q80UT7	RL7A_MOUSE	ENSMUST00000085282;ENSMUST00000102898	OTTMUSP00000012507	MGI:1353472	NP_038749;XP_990387;XP_001480775;XP_486245;XP_903693;XP_926227;XP_001473483;XP_001473506;XP_001473524;XP_001474976;XP_892272;XP_911331;XP_001481210;XP_982574;XP_620604;XP_910636;XP_146939;XP_984805	PF01248	Ribosomal_L7Ae	Ribosomal protein L7Ae/L30e/S12e/Gadd45 family	GO:0000267;GO:0005624;GO:0005626;GO:0005840;GO:0030529;GO:0032991;GO:0042788;GO:0043226;GO:0043228;GO:0043229;GO:0043232;GO:0044424;GO:0044444;GO:0044464	cell fraction;membrane fraction;insoluble fraction;ribosome;ribonucleoprotein complex;macromolecular complex;polysomal ribosome;organelle;non-membrane-bounded organelle;intracellular organelle;intracellular non-membrane-bounded organelle			GO:0009987;GO:0022613;GO:0042254;GO:0044085	cellular process;ribonucleoprotein complex biogenesis;ribosome biogenesis;cellular component biogenesis	mmu:27176;mmu:666669	ko03010	Ribosome	K02936	29.976	266
IPI00798513	IPI00798513;IPI00622913	Guanine nucleotide-binding protein G(s) subunit alpha isoforms XLas;Adenylate cyclase-stimulating G alpha protein;Extra large alphas protein	Gnas;Gnas1	Isoform XLas-3 of Guanine nucleotide-binding protein G(s) subunit alpha isoforms XLas;Isoform XLas-2 of Guanine nucleotide-binding protein G(s) subunit alpha isoforms XLas	4	3	2	-1.37147	0.0473504	-0.817519	-1.92543	-0.428599	-2.81944	54	21	Q6R0H7-3;Q6R0H7;Q9JJ33;Q9QYZ0;Q6R0H7-2;A2A606	GNAS1_MOUSE	ENSMUST00000080493;ENSMUST00000087876;ENSMUST00000087877;ENSMUST00000109089	OTTMUSP00000017949	MGI:95777;MGI:95777	NP_963911	PF00503	G-alpha	G-protein alpha subunit	GO:0000267;GO:0005624;GO:0005626;GO:0005834;GO:0019897;GO:0019898;GO:0032991;GO:0043234;GO:0044425;GO:0044459;GO:0044464	cell fraction;membrane fraction;insoluble fraction;heterotrimeric G-protein complex;extrinsic to plasma membrane;extrinsic to membrane;macromolecular complex;protein complex;membrane part;plasma membrane part;cell part	GO:0000166;GO:0003824;GO:0003924;GO:0004871;GO:0005488;GO:0005515;GO:0005525;GO:0016462;GO:0016787;GO:0016817;GO:0016818;GO:0017076;GO:0017111;GO:0019001;GO:0032553;GO:0032555;GO:0032561;GO:0060089	nucleotide binding;catalytic activity;GTPase activity;signal transducer activity;binding;protein binding;GTP binding;pyrophosphatase activity;hydrolase activity;hydrolase activity, acting on acid anhydrides	GO:0001503;GO:0001958;GO:0002682;GO:0002761;GO:0002763;GO:0006091;GO:0006112;GO:0006140;GO:0007154;GO:0007165;GO:0007166;GO:0007186;GO:0007187;GO:0007188;GO:0007189;GO:0007190;GO:0007191;GO:0007212;GO:0007242;GO:0008152;GO:0009653;GO:0009886;GO:0009887;GO:0009888;GO:0009889;GO:0009987;GO:0010171;GO:0010578;GO:0010579;GO:0015980;GO:0019219;GO:0019222;GO:0019932;GO:0019933;GO:0019935;GO:0030278;GO:…	ossification;endochondral ossification;regulation of immune system process;regulation of myeloid leukocyte differentiation;positive regulation of myeloid leukocyte differentiation;generation of precursor metabolites and energy	mmu:14683	ko04020;ko04540;ko04270;ko04912;ko04916;ko04730;ko04742;ko05110	Calcium signaling pathway;Gap junction;Vascular smooth muscle contraction;GnRH signaling pathway;Melanogenesis;Long-term depression;Taste transduction;Vibrio cholerae infection	K04632	85.917	827
IPI00130038	IPI00130038;IPI00556772;IPI00930842;IPI00654351;IPI00653754;IPI00831429;IPI00458320	Inhibitor of nuclear factor kappa-B kinase subunit beta;I-kappa-B kinase 2;Nuclear factor NF-kappa-B inhibitor kinase beta;Ikbkb protein;Putative uncharacterized protein;Inhibitor of kappaB kinase beta, isoform CRA_b	Ikbkb;Ikkb;mCG_6974	Inhibitor of nuclear factor kappa-B kinase subunit beta;inhibitor of nuclear factor kappa B kinase beta subunit isoform 1;inhibitor of nuclear factor kappa B kinase beta subunit isoform 2;Putative uncharacterized protein	6	5	3	-1.37119	0.0473852	-1.26177	-1.4806	-1.49358	-0.962695	21	15	O88351;Q5D0E0;Q05DR8;Q3USX8;Q3U141	IKKB_MOUSE;Q5D0E0_MOUSE;Q05DR8_MOUSE;Q3U141_MOUSE	ENSMUST00000033939;ENSMUST00000063401	OTTMUSP00000022455;OTTMUSP00000022456	MGI:1338071;MGI:1338071;MGI:1338071;MGI:1338071	NP_001153246;NP_034676	PF00069	Pkinase	Protein kinase domain	GO:0005737;GO:0044424;GO:0044464	cytoplasm;intracellular part;cell part	GO:0000166;GO:0001882;GO:0001883;GO:0003824;GO:0004672;GO:0004674;GO:0004702;GO:0004871;GO:0005057;GO:0005488;GO:0005515;GO:0005524;GO:0008384;GO:0016301;GO:0016740;GO:0016772;GO:0016773;GO:0017076;GO:0030554;GO:0032553;GO:0032555;GO:0032559;GO:0042802;GO:0060089	nucleotide binding;nucleoside binding;purine nucleoside binding;catalytic activity;protein kinase activity;protein serine/threonine kinase activity;receptor signaling protein serine/threonine kinase activity;signal transducer activity	GO:0001776;GO:0001782;GO:0002260;GO:0002376;GO:0006464;GO:0006468;GO:0006793;GO:0006796;GO:0007252;GO:0008152;GO:0009987;GO:0016310;GO:0019538;GO:0034960;GO:0042592;GO:0043170;GO:0043283;GO:0043412;GO:0043687;GO:0044237;GO:0044238;GO:0044260;GO:0044267;GO:0048872;GO:0065007;GO:0065008;GO:0009889;GO:0010468;GO:0010556;GO:0019219;GO:0019222;GO:0031323;GO:0031326;GO:0043388;GO:0044093;GO:0045449;GO:…	leukocyte homeostasis;B cell homeostasis;lymphocyte homeostasis;immune system process;protein modification process;protein amino acid phosphorylation;phosphorus metabolic process;phosphate metabolic process;I-kappaB phosphorylation;metabolic process	mmu:16150	ko04010;ko04210;ko04910;ko04920;ko04620;ko04660;ko04662;ko04062;ko05200;ko05212;ko05221;ko05220;ko05215;ko05222;ko04930;ko05120	MAPK signaling pathway;Apoptosis;Insulin signaling pathway;Adipocytokine signaling pathway;Toll-like receptor signaling pathway;T cell receptor signaling pathway;B cell receptor signaling pathway;Chemokine signaling pathway;Pathways in cancer;Pancreatic cancer;Acute myeloid leukemia;Chronic myeloid leukemia;Prostate cancer;Small cell lung cancer;Type II diabetes mellitus;Epithelial cell signaling…	K07209	86.689	757
IPI00226889	IPI00226889	U3 small nucleolar RNA-associated protein 15 homolog;Src-associated protein SAW	Utp15	U3 small nucleolar RNA-associated protein 15 homolog	3	2	2	-1.36989	0.0475431	-1.59666	-1.14313	-1.64174	-0.937033	27	21	Q8C7V3;Q3TN42	UTP15_MOUSE	ENSMUST00000040972		MGI:2145443	NP_849249	PF09384;PF00400	U3_snoRNA_C;WD40	U3 small nucleolar RNA C terminal;WD domain, G-beta repeat	GO:0005730;GO:0043226;GO:0043228;GO:0043229;GO:0043232;GO:0044422;GO:0044424;GO:0044428;GO:0044446;GO:0044464	nucleolus;organelle;non-membrane-bounded organelle;intracellular organelle;intracellular non-membrane-bounded organelle;organelle part;intracellular part;nuclear part;intracellular organelle part;cell part			GO:0006139;GO:0006364;GO:0006396;GO:0006807;GO:0008152;GO:0009987;GO:0016070;GO:0016072;GO:0034470;GO:0034660;GO:0034960;GO:0043170;GO:0043283;GO:0044237;GO:0044238;GO:0044260	nucleobase, nucleoside, nucleotide and nucleic acid metabolic process;rRNA processing;RNA processing;nitrogen compound metabolic process;metabolic process;cellular process;RNA metabolic process;rRNA metabolic process;ncRNA processing	mmu:105372				59.374	528
IPI00876121	IPI00876121;IPI00876461;IPI00221876	Putative uncharacterized protein;WD repeat domain 36, isoform CRA_a	Wdr36;mCG_119970	WD repeat domain 36 isoform 1;WD repeat domain 36 isoform 2;WD repeat domain 36 isoform 3	3	3	2	-1.36811	0.0477613	-1.34909	-1.38714	-1.29947	-1.4421	507	321	Q3TAQ9;Q505Q0;Q6NSU4;Q8VDN1;Q3TA68;Q3USW8;Q8BHI6	Q3TAQ9_MOUSE;Q3TA68_MOUSE;Q3USW8_MOUSE	ENSMUST00000053663		MGI:1917819;MGI:1917819;MGI:1917819	NP_001103485;NP_001103486;NP_659112	PF04192;PF00400	Utp21;WD40	Utp21 specific WD40 associated putative domain;WD domain, G-beta repeat	GO:0030529;GO:0030684;GO:0032040;GO:0032991;GO:0044424;GO:0044464	ribonucleoprotein complex;preribosome;small-subunit processome;macromolecular complex;intracellular part;cell part			GO:0006139;GO:0006364;GO:0006396;GO:0006807;GO:0008152;GO:0009987;GO:0016070;GO:0016072;GO:0034470;GO:0034660;GO:0034960;GO:0043170;GO:0043283;GO:0044237;GO:0044238;GO:0044260	nucleobase, nucleoside, nucleotide and nucleic acid metabolic process;rRNA processing;RNA processing;nitrogen compound metabolic process;metabolic process;cellular process;RNA metabolic process;rRNA metabolic process;ncRNA processing	mmu:225348				99.719	899
IPI00125776	IPI00125776;IPI00113187	Mitochondrial import inner membrane translocase subunit Tim8 A;Deafness dystonia protein 1 homolog	Timm8a1;Ddp1;Tim8a;Timm8a	Mitochondrial import inner membrane translocase subunit Tim8 A	5	5	4	-1.36552	0.0480799	-1.51142	-1.19877	-1.56377	-1.21962	57	27	Q9WVA2;B1AV37	TIM8A_MOUSE	ENSMUST00000052902;ENSMUST00000054213	OTTMUSP00000020835	MGI:1353433	NP_038926;XP_001472881;XP_001473691	PF02953	zf-Tim10_DDP	Tim10/DDP family zinc finger	GO:0005743;GO:0016020;GO:0019866;GO:0031090;GO:0031966;GO:0032991;GO:0042719;GO:0043234;GO:0044422;GO:0044424;GO:0044429;GO:0044444;GO:0044446;GO:0044464	mitochondrial inner membrane;membrane;organelle inner membrane;organelle membrane;mitochondrial membrane;macromolecular complex;mitochondrial intermembrane space protein transporter complex;protein complex;organelle part;intracellular part	GO:0005488;GO:0008270;GO:0043167;GO:0043169;GO:0046872;GO:0046914	binding;zinc ion binding;ion binding;cation binding;metal ion binding;transition metal ion binding	GO:0006605;GO:0006612;GO:0006626;GO:0006810;GO:0006839;GO:0006886;GO:0006996;GO:0007005;GO:0007006;GO:0007007;GO:0009987;GO:0015031;GO:0016043;GO:0016044;GO:0017038;GO:0045039;GO:0045184;GO:0046907;GO:0051234;GO:0051649;GO:0055085;GO:0065002	protein targeting;protein targeting to membrane;protein targeting to mitochondrion;transport;mitochondrial transport;intracellular protein transport;organelle organization;mitochondrion organization;mitochondrial membrane organization	mmu:100039343;mmu:100045062;mmu:30058				11.042	97
IPI00153664	IPI00153664;IPI00749536;IPI00750097	Methyltransferase-like protein 11A;Methyltransferase like 11A	Mettl11a;RP23-221O14.3-003;RP23-221O14.3-007	Methyltransferase-like protein 11A;Methyltransferase like 11A;Methyltransferase like 11A	2	2	1	-1.3653	0.0481071	-1.3284	-1.45893	-1.14587	-1.40221	50	15	Q8R2U4;A2APZ4;A2APZ3;A2APZ2	ME11A_MOUSE;A2APZ3_MOUSE;A2APZ2_MOUSE	ENSMUST00000041830	OTTMUSP00000012686;OTTMUSP00000012687;OTTMUSP00000012688	MGI:1913867;MGI:1913867;MGI:1913867	NP_733480	PF05891	DUF858	Eukaryotic protein of unknown function (DUF858)			GO:0003824;GO:0008168;GO:0016740;GO:0016741	catalytic activity;methyltransferase activity;transferase activity;transferase activity, transferring one-carbon groups			mmu:66617				25.42	223
IPI00170093	IPI00170093	NADH dehydrogenase [ubiquinone] iron-sulfur protein 8, mitochondrial;NADH-ubiquinone oxidoreductase 23 kDa subunit;Complex I-23kD	Ndufs8	NADH dehydrogenase [ubiquinone] iron-sulfur protein 8, mitochondrial	2	2	1	-1.36348	0.0483321	-0.46749	-1.91456	-0.869588	-1.85738	60	27	Q8K3J1;Q3UY05;Q5M9P5;Q8VC72	NDUS8_MOUSE	ENSMUST00000075092		MGI:2385079	NP_659119	PF00037	Fer4	4Fe-4S binding domain	GO:0005739;GO:0043226;GO:0043227;GO:0043229;GO:0043231;GO:0044424;GO:0044425;GO:0044444;GO:0044464;GO:0070469	mitochondrion;organelle;membrane-bounded organelle;intracellular organelle;intracellular membrane-bounded organelle;intracellular part;membrane part;cytoplasmic part;cell part;respiratory chain	GO:0003824;GO:0003954;GO:0005488;GO:0005506;GO:0008137;GO:0009055;GO:0016491;GO:0016651;GO:0016655;GO:0043167;GO:0043169;GO:0046872;GO:0046914;GO:0050136;GO:0051536;GO:0051539;GO:0051540	catalytic activity;NADH dehydrogenase activity;binding;iron ion binding;NADH dehydrogenase (ubiquinone) activity;electron carrier activity;oxidoreductase activity;oxidoreductase activity, acting on NADH or NADPH	GO:0006091;GO:0006810;GO:0008152;GO:0009987;GO:0022900;GO:0044237;GO:0051234;GO:0055114	generation of precursor metabolites and energy;transport;metabolic process;cellular process;electron transport chain;cellular metabolic process;establishment of localization;oxidation reduction	mmu:225887	ko00190;ko05010;ko05012;ko05016	Oxidative phosphorylation;Alzheimer's disease;Parkinson's disease;Huntington's disease	K03941	24.038	212
IPI00353157	IPI00353157;IPI00849558;IPI00889962;IPI00653768	Uncharacterized protein C19orf47 homolog		Isoform 1 of Uncharacterized protein C19orf47 homolog;Isoform 2 of Uncharacterized protein C19orf47 homolog;hypothetical protein LOC66367 isoform 2	6	5	6	-1.3626	0.0484417	-1.3693	-1.34783	-1.51875	-1.3559	57	30	Q8R3Y5-1;Q8R3Y5;Q8R3Y5-2	CS047_MOUSE	ENSMUST00000067386		MGI:1913617;MGI:1913617	NP_780316;NP_001116239										mmu:66367				44.41	413
IPI00340244	IPI00340244;IPI00867859	Uncharacterized protein C12orf29 homolog		Isoform 1 of Uncharacterized protein C12orf29 homolog;Isoform 2 of Uncharacterized protein C12orf29 homolog	2	2	2	-1.36013	0.0487491	-1.43245	-1.03952	-1.43989	-1.28781	161	135	Q8BHN7-1;Q8BHN7;Q8BHN7-2	CL029_MOUSE	ENSMUST00000054471		MGI:1921197;MGI:1921197	NP_780337										mmu:68281				37.417	327
IPI00130754	IPI00130754	Ephrin-B1;EPH-related receptor tyrosine kinase ligand 2;CEK5 receptor ligand;Stimulated by retinoic acid gene 1 protein	Efnb1;Epl2;Eplg2;Lerk2;Stra1	Ephrin-B1	2	2	2	-1.35554	0.0493248	-1.16926	-1.59657	-1.25896	-1.45211	591	598	P52795;Q544L9	EFNB1_MOUSE	ENSMUST00000052839	OTTMUSP00000019590	MGI:102708	NP_034240	PF00812	Ephrin	Ephrin	GO:0016021;GO:0031224;GO:0044425;GO:0044464;GO:0045121	integral to membrane;intrinsic to membrane;membrane part;cell part;membrane raft	GO:0005102;GO:0005488;GO:0005515;GO:0046875	receptor binding;binding;protein binding;ephrin receptor binding	GO:0001755;GO:0002682;GO:0002684;GO:0002694;GO:0002696;GO:0006928;GO:0007389;GO:0007411;GO:0008284;GO:0009880;GO:0009987;GO:0016477;GO:0032502;GO:0032944;GO:0032946;GO:0042102;GO:0042127;GO:0042129;GO:0048518;GO:0048522;GO:0048870;GO:0050670;GO:0050671;GO:0050789;GO:0050794;GO:0050863;GO:0050865;GO:0050867;GO:0050870;GO:0051249;GO:0051251;GO:0065007;GO:0070663;GO:0070665;GO:0070666;GO:0070668	neural crest cell migration;regulation of immune system process;positive regulation of immune system process;regulation of leukocyte activation;positive regulation of leukocyte activation;cell motion;pattern specification process;axon guidance	mmu:13641	ko04360	Axon guidance	K05463	37.859	345
IPI00652987	IPI00652987;IPI00120691	DEAD (Asp-Glu-Ala-Asp) box polypeptide 21;Putative uncharacterized protein;DEAD (Asp-Glu-Ala-Asp) box polypeptide 21, isoform CRA_b;Nucleolar RNA helicase 2;Nucleolar RNA helicase II;Nucleolar RNA helicase Gu;RH II/Gu;Gu-alpha;DEAD box protein 21	Ddx21;mCG_11315	DEAD (Asp-Glu-Ala-Asp) box polypeptide 21;Nucleolar RNA helicase 2	34	32	24	-1.35308	0.0496347	-1.38046	-1.2076	-1.65241	-1.32571	24	12	Q3TVJ3;Q3ULC7;Q6PCP0;Q8K2L4;Q9CSR3;Q9CWZ5;Q9JIK5	Q3TVJ3_MOUSE;DDX21_MOUSE	ENSMUST00000045866		MGI:1860494;MGI:1860494	NP_062426	PF00270;PF08152;PF00271	DEAD;GUCT;Helicase_C	DEAD/DEAH box helicase;GUCT (NUC152) domain;Helicase conserved C-terminal domain	GO:0005634;GO:0043226;GO:0043227;GO:0043229;GO:0043231;GO:0044424;GO:0044464;GO:0005730;GO:0043228;GO:0043232;GO:0044422;GO:0044428;GO:0044446	nucleus;organelle;membrane-bounded organelle;intracellular organelle;intracellular membrane-bounded organelle;intracellular part;cell part;nucleolus;non-membrane-bounded organelle;intracellular non-membrane-bounded organelle;organelle part;nuclear part	GO:0000166;GO:0001882;GO:0001883;GO:0003676;GO:0003723;GO:0003824;GO:0004386;GO:0005488;GO:0005515;GO:0005524;GO:0008026;GO:0016462;GO:0016787;GO:0016817;GO:0016818;GO:0016887;GO:0017076;GO:0017111;GO:0030554;GO:0032553;GO:0032555;GO:0032559;GO:0042623;GO:0070035	nucleotide binding;nucleoside binding;purine nucleoside binding;nucleic acid binding;RNA binding;catalytic activity;helicase activity;binding;protein binding;ATP binding;ATP-dependent helicase activity;pyrophosphatase activity;hydrolase activity			mmu:56200				93.55	851
IPI00229008	IPI00229008	NADH dehydrogenase [ubiquinone] iron-sulfur protein 4, mitochondrial;NADH-ubiquinone oxidoreductase 18 kDa subunit;Complex I-18 kDa;Complex I-AQDQ	Ndufs4	NADH dehydrogenase [ubiquinone] iron-sulfur protein 4, mitochondrial	3	3	2	-1.3498	0.0500515	-1.11033	-1.61735	-0.789366	-1.58928	66	63	Q9CXZ1;Q923F9;Q9CTT4	NDUS4_MOUSE	ENSMUST00000022286		MGI:1343135	NP_035017	PF04800	ETC_C1_NDUFA4	ETC complex I subunit conserved region	GO:0005747;GO:0030964;GO:0032991;GO:0043234;GO:0044422;GO:0044424;GO:0044425;GO:0044429;GO:0044444;GO:0044446;GO:0044455;GO:0044464;GO:0045271	mitochondrial respiratory chain complex I;NADH dehydrogenase complex;macromolecular complex;protein complex;organelle part;intracellular part;membrane part;mitochondrial part;cytoplasmic part;intracellular organelle part;mitochondrial membrane part	GO:0003824;GO:0003954;GO:0008137;GO:0016491;GO:0016651;GO:0016655;GO:0050136	catalytic activity;NADH dehydrogenase activity;NADH dehydrogenase (ubiquinone) activity;oxidoreductase activity;oxidoreductase activity, acting on NADH or NADPH;oxidoreductase activity, acting on NADH or NADPH, quinone or similar compound as acceptor	GO:0006091;GO:0006810;GO:0008152;GO:0009987;GO:0022900;GO:0044237;GO:0051234;GO:0055114	generation of precursor metabolites and energy;transport;metabolic process;cellular process;electron transport chain;cellular metabolic process;establishment of localization;oxidation reduction	mmu:17993	ko00190;ko05010;ko05012;ko05016	Oxidative phosphorylation;Alzheimer's disease;Parkinson's disease;Huntington's disease	K03937	19.784	175
IPI00830611	IPI00830611;IPI00125950;IPI00279931;IPI00858120	Histone-arginine methyltransferase CARM1;Protein arginine N-methyltransferase 4;Coactivator-associated arginine methyltransferase 1	Carm1;Prmt4	70 kDa protein;Isoform 1 of Histone-arginine methyltransferase CARM1;Isoform 2 of Histone-arginine methyltransferase CARM1	6	4	6	-1.34903	0.0501502	-1.38008	-1.17572	-1.31797	-1.49699	51	48	Q9WVG6-1;Q9WVG6;Q9WVG6-2	CARM1_MOUSE	ENSMUST00000034703;ENSMUST00000115394;ENSMUST00000115395	OTTMUSP00000022541;OTTMUSP00000022539;OTTMUSP00000022540	MGI:1913208;MGI:1913208	NP_067506;NP_694781	PF06325	PrmA	Ribosomal protein L11 methyltransferase (PrmA)	GO:0005634;GO:0005737;GO:0043226;GO:0043227;GO:0043229;GO:0043231;GO:0044424;GO:0044464	nucleus;cytoplasm;organelle;membrane-bounded organelle;intracellular organelle;intracellular membrane-bounded organelle;intracellular part;cell part	GO:0003712;GO:0003713;GO:0003824;GO:0005488;GO:0005515;GO:0008134;GO:0008168;GO:0008170;GO:0008276;GO:0008469;GO:0008757;GO:0016273;GO:0016274;GO:0016563;GO:0016740;GO:0016741;GO:0030528;GO:0042054	transcription cofactor activity;transcription coactivator activity;catalytic activity;binding;protein binding;transcription factor binding;methyltransferase activity;N-methyltransferase activity;protein methyltransferase activity	GO:0006139;GO:0006325;GO:0006350;GO:0006355;GO:0006464;GO:0006479;GO:0006730;GO:0006807;GO:0006996;GO:0007154;GO:0007165;GO:0007242;GO:0008152;GO:0008213;GO:0009058;GO:0009059;GO:0009889;GO:0009987;GO:0010468;GO:0010556;GO:0016043;GO:0016568;GO:0016569;GO:0016570;GO:0016571;GO:0019219;GO:0019222;GO:0019538;GO:0030518;GO:0030522;GO:0031323;GO:0031326;GO:0032259;GO:0034645;GO:0034960;GO:0034961;GO:…	nucleobase, nucleoside, nucleotide and nucleic acid metabolic process;chromatin organization;transcription;regulation of transcription, DNA-dependent;protein modification process;protein amino acid methylation;one-carbon metabolic process	mmu:59035			K05931	70.322	651
IPI00323064	IPI00323064	Programmed cell death protein 4;Topoisomerase-inhibitor suppressed protein;Protein MA-3	Pdcd4;Ma3;Tis	Programmed cell death protein 4	12	11	8	-1.34863	0.0502012	-1.34532	-1.35193	-1.39376	-1.05336	66	36	Q61823	PDCD4_MOUSE	ENSMUST00000025931;ENSMUST00000074371		MGI:107490	NP_001161963;NP_001161964;NP_035180	PF02847	MA3	MA3 domain	GO:0005634;GO:0005829;GO:0043226;GO:0043227;GO:0043229;GO:0043231;GO:0044424;GO:0044444;GO:0044464	nucleus;cytosol;organelle;membrane-bounded organelle;intracellular organelle;intracellular membrane-bounded organelle;intracellular part;cytoplasmic part;cell part	GO:0003676;GO:0003723;GO:0005488;GO:0005515	nucleic acid binding;RNA binding;binding;protein binding	GO:0001932;GO:0006469;GO:0006915;GO:0007049;GO:0007568;GO:0007569;GO:0008219;GO:0009889;GO:0009890;GO:0009892;GO:0009966;GO:0009987;GO:0010468;GO:0010556;GO:0010558;GO:0010605;GO:0010627;GO:0010629;GO:0010646;GO:0012501;GO:0016265;GO:0016481;GO:0019219;GO:0019220;GO:0019222;GO:0031323;GO:0031324;GO:0031326;GO:0031327;GO:0031399;GO:0032268;GO:0032502;GO:0033673;GO:0042325;GO:0043086;GO:0043405;GO:…	regulation of protein amino acid phosphorylation;negative regulation of protein kinase activity;apoptosis;cell cycle;aging;cell aging;cell death;regulation of biosynthetic process;negative regulation of biosynthetic process	mmu:18569				51.702	469
IPI00876259	IPI00876259;IPI00626520;IPI00755941;IPI00755613;IPI00466701;IPI00750171;IPI00116278;IPI00808090;IPI00874767;IPI00719992;IPI00756366	Formin binding protein 1;Formin-binding protein 1;Formin-binding protein 17	Fnbp1;RP23-243I3.2-006;Fbp17;Kiaa0554;RP23-243I3.2-005;RP23-243I3.2-007;RP23-243I3.2-004	Formin binding protein 1;Isoform 1 of Formin-binding protein 1;Isoform 4 of Formin-binding protein 1;Formin binding protein 1;Formin binding protein 1;Formin binding protein 1;Formin binding protein 1;Isoform 3 of Formin-binding protein 1;64 kDa protein;Is	5	4	4	-1.34844	0.0502246	-0.880852	-1.92901	-0.763913	-1.81604	174	117	A2AQ41;Q80TY0-1;Q80TY0;Q80TY0-4;A2AQ45;A2AQ42;Q61053;A2AQ44;Q80TY0-2;A2AQ43;Q80TY0-3;Q80TY0-5	A2AQ41_MOUSE;FNBP1_MOUSE;A2AQ45_MOUSE;A2AQ42_MOUSE;A2AQ44_MOUSE	ENSMUST00000100208;ENSMUST00000113554;ENSMUST00000113552;ENSMUST00000113560;ENSMUST00000113562;ENSMUST00000113564;ENSMUST00000113555;ENSMUST00000075326;ENSMUST00000100207	OTTMUSP00000012734;OTTMUSP00000012682;OTTMUSP00000012733;OTTMUSP00000012735;OTTMUSP00000012732;OTTMUSP00000012684;OTTMUSP00000012683	MGI:109606;MGI:109606;MGI:109606;MGI:109606;MGI:109606;MGI:109606;MGI:109606;MGI:109606;MGI:109606	NP_001033789;NP_062279	PF00611;PF00018	FCH;SH3_1	Fes/CIP4 homology domain;SH3 domain	GO:0000323;GO:0005764;GO:0005773;GO:0005856;GO:0005886;GO:0005938;GO:0016020;GO:0031410;GO:0031982;GO:0043226;GO:0043227;GO:0043228;GO:0043229;GO:0043231;GO:0043232;GO:0044424;GO:0044444;GO:0044464	lytic vacuole;lysosome;vacuole;cytoskeleton;plasma membrane;cell cortex;membrane;cytoplasmic vesicle;vesicle;organelle;membrane-bounded organelle;non-membrane-bounded organelle;intracellular organelle;intracellular membrane-bounded organelle	GO:0005488;GO:0005515;GO:0008289	binding;protein binding;lipid binding	GO:0006810;GO:0006897;GO:0009987;GO:0010324;GO:0016043;GO:0016044;GO:0016192;GO:0051234	transport;endocytosis;cellular process;membrane invagination;cellular component organization;membrane organization;vesicle-mediated transport;establishment of localization	mmu:14269				71.814	619
IPI00396812	IPI00396812;IPI00648702	Exosome complex exonuclease RRP40;Ribosomal RNA-processing protein 40;Exosome component 3	Exosc3;Rrp40;RP23-76I24.4-004	Exosome complex exonuclease RRP40;Exosome component 3	4	4	2	-1.34795	0.0502875	-1.33833	-1.16483	-1.35757	-1.57808	45	18	Q7TQK4;A2AKB8;A2AKC0	EXOS3_MOUSE;A2AKC0_MOUSE	ENSMUST00000030003;ENSMUST00000107799	OTTMUSP00000008050;OTTMUSP00000008075	MGI:1913612;MGI:1913612	NP_079789				GO:0000178;GO:0005730;GO:0005737;GO:0032991;GO:0043226;GO:0043228;GO:0043229;GO:0043232;GO:0043234;GO:0044422;GO:0044424;GO:0044428;GO:0044446;GO:0044464;GO:0000176;GO:0000177;GO:0044444	exosome (RNase complex);nucleolus;cytoplasm;macromolecular complex;organelle;non-membrane-bounded organelle;intracellular organelle;intracellular non-membrane-bounded organelle;protein complex;organelle part;intracellular part;nuclear part	GO:0003676;GO:0003723;GO:0003824;GO:0004518;GO:0004527;GO:0005488;GO:0016787;GO:0016788;GO:0005515	nucleic acid binding;RNA binding;catalytic activity;nuclease activity;exonuclease activity;binding;hydrolase activity;hydrolase activity, acting on ester bonds;protein binding	GO:0006139;GO:0006364;GO:0006396;GO:0006807;GO:0008152;GO:0009987;GO:0016070;GO:0016072;GO:0034470;GO:0034660;GO:0034960;GO:0043170;GO:0043283;GO:0044237;GO:0044238;GO:0044260	nucleobase, nucleoside, nucleotide and nucleic acid metabolic process;rRNA processing;RNA processing;nitrogen compound metabolic process;metabolic process;cellular process;RNA metabolic process;rRNA metabolic process;ncRNA processing	mmu:66362			K03681	29.546	274
IPI00133532	IPI00133532	Exosome complex exonuclease RRP46;Ribosomal RNA-processing protein 46;Exosome component 5	Exosc5;D7Wsu180e;Rrp46	Exosome complex exonuclease RRP46	3	2	3	-1.34708	0.0503988	-1.38027	-1.21973	-1.58362	-1.3139	6	3	Q9CRA8;Q3U2K4	EXOS5_MOUSE	ENSMUST00000079634		MGI:107889	NP_613052	PF01138;PF03725	RNase_PH;RNase_PH_C	3' exoribonuclease family, domain 1;3' exoribonuclease family, domain 2	GO:0000178;GO:0005730;GO:0032991;GO:0043226;GO:0043228;GO:0043229;GO:0043232;GO:0043234;GO:0044422;GO:0044424;GO:0044428;GO:0044446;GO:0044464	exosome (RNase complex);nucleolus;macromolecular complex;organelle;non-membrane-bounded organelle;intracellular organelle;intracellular non-membrane-bounded organelle;protein complex;organelle part;intracellular part;nuclear part	GO:0000175;GO:0003676;GO:0003723;GO:0003824;GO:0004518;GO:0004527;GO:0004532;GO:0004540;GO:0005488;GO:0008408;GO:0016787;GO:0016788;GO:0016796;GO:0016896	3'-5'-exoribonuclease activity;nucleic acid binding;RNA binding;catalytic activity;nuclease activity;exonuclease activity;exoribonuclease activity;ribonuclease activity;binding;3'-5' exonuclease activity;hydrolase activity	GO:0006139;GO:0006364;GO:0006396;GO:0006807;GO:0008152;GO:0009987;GO:0016070;GO:0016072;GO:0034470;GO:0034660;GO:0034960;GO:0043170;GO:0043283;GO:0044237;GO:0044238;GO:0044260	nucleobase, nucleoside, nucleotide and nucleic acid metabolic process;rRNA processing;RNA processing;nitrogen compound metabolic process;metabolic process;cellular process;RNA metabolic process;rRNA metabolic process;ncRNA processing	mmu:27998			K01149	25.194	235
IPI00331332	IPI00331332	NADH dehydrogenase [ubiquinone] 1 alpha subcomplex subunit 5;NADH-ubiquinone oxidoreductase 13 kDa-B subunit;Complex I-13kD-B;Complex I subunit B13	Ndufa5	NADH dehydrogenase [ubiquinone] 1 alpha subcomplex subunit 5	3	3	3	-1.34405	0.0507891	-1.22997	-1.45812	-1.14606	-1.74448	99	63	Q9CPP6;Q9CX78	NDUA5_MOUSE	ENSMUST00000023851	OTTMUSP00000033286	MGI:1915452	NP_080890	PF04716	ETC_C1_NDUFA5	ETC complex I subunit conserved region	GO:0005743;GO:0016020;GO:0019866;GO:0031090;GO:0031966;GO:0044422;GO:0044424;GO:0044425;GO:0044429;GO:0044444;GO:0044446;GO:0044464;GO:0070469	mitochondrial inner membrane;membrane;organelle inner membrane;organelle membrane;mitochondrial membrane;organelle part;intracellular part;membrane part;mitochondrial part;cytoplasmic part;intracellular organelle part;cell part;respiratory chain	GO:0003824;GO:0016491;GO:0016651	catalytic activity;oxidoreductase activity;oxidoreductase activity, acting on NADH or NADPH	GO:0006091;GO:0006810;GO:0008152;GO:0009987;GO:0022900;GO:0022904;GO:0044237;GO:0051234;GO:0055114	generation of precursor metabolites and energy;transport;metabolic process;cellular process;electron transport chain;respiratory electron transport chain;cellular metabolic process;establishment of localization;oxidation reduction	mmu:68202	ko00190;ko05010;ko05012;ko05016	Oxidative phosphorylation;Alzheimer's disease;Parkinson's disease;Huntington's disease	K03949	13.36	116
IPI00453707	IPI00453707	KTEL motif-containing protein 1;CAP10-like 46 kDa protein	Ktelc1;Clp46	KTEL motif-containing protein 1	3	1	2	-1.34373	0.0508304	-0.787795	-1.79896	-0.888496	-2.04419	207	147	Q8BYB9;Q8BLG5;Q8BV60	KTEL1_MOUSE	ENSMUST00000036210	OTTMUSP00000035454	MGI:2444232	NP_759012	PF05686	DUF821	Arabidopsis thaliana protein of unknown function (DUF821)	GO:0005783;GO:0005788;GO:0031974;GO:0043226;GO:0043227;GO:0043229;GO:0043231;GO:0043233;GO:0044422;GO:0044424;GO:0044432;GO:0044444;GO:0044446;GO:0044464;GO:0070013	endoplasmic reticulum;endoplasmic reticulum lumen;membrane-enclosed lumen;organelle;membrane-bounded organelle;intracellular organelle;intracellular membrane-bounded organelle;organelle lumen;organelle part;intracellular part;endoplasmic reticulum part					mmu:224143				46.379	392
IPI00227178	IPI00227178	Inositol-tetrakisphosphate 1-kinase;Inositol-triphosphate 5/6-kinase;Inositol 1,3,4-trisphosphate 5/6-kinase;Ins(1,3,4)P(3) 5/6-kinase	Itpk1	Inositol-tetrakisphosphate 1-kinase	2	2	1	-1.34341	0.0508711	-1.04369	-1.19764	-1.52143	-1.48918	117	96	Q8BYN3	ITPK1_MOUSE	ENSMUST00000046518		MGI:2446159	NP_766172	PF05770	Ins134_P3_kin	Inositol 1, 3, 4-trisphosphate 5/6-kinase	GO:0005622;GO:0044464	intracellular;cell part	GO:0000166;GO:0000287;GO:0001882;GO:0001883;GO:0003824;GO:0004428;GO:0005488;GO:0005524;GO:0016301;GO:0016740;GO:0016772;GO:0016773;GO:0016787;GO:0016853;GO:0017076;GO:0030554;GO:0032553;GO:0032555;GO:0032559;GO:0035300;GO:0043167;GO:0043169;GO:0046872;GO:0047325;GO:0051765;GO:0051766	nucleotide binding;magnesium ion binding;nucleoside binding;purine nucleoside binding;catalytic activity;inositol or phosphatidylinositol kinase activity;binding;ATP binding;kinase activity;transferase activity	GO:0006020;GO:0006066;GO:0008152;GO:0019751;GO:0032957;GO:0043647	inositol metabolic process;alcohol metabolic process;metabolic process;polyol metabolic process;inositol trisphosphate metabolic process;inositol phosphate metabolic process	mmu:217837	ko00562;ko04070	Inositol phosphate metabolism;Phosphatidylinositol signaling system	K00913;K01765	46.145	419
IPI00135630	IPI00135630	Zfp385a protein	Zfp385a;Zfp385	zinc finger protein 385A	5	4	3	-1.34299	0.0509252	-1.17207	-1.72807	-1.12183	-1.51391	63	53	Q8VD12;Q9QY68	Q8VD12_MOUSE	ENSMUST00000087898		MGI:1352495	NP_038894				GO:0005622;GO:0044464	intracellular;cell part	GO:0003676;GO:0005488;GO:0005515;GO:0008270;GO:0043167;GO:0043169;GO:0046872;GO:0046914	nucleic acid binding;binding;protein binding;zinc ion binding;ion binding;cation binding;metal ion binding;transition metal ion binding			mmu:29813				40.446	386
IPI00112549	IPI00112549;IPI00556840;IPI00857226;IPI00857822;IPI00856996;IPI00856216	Long-chain-fatty-acid--CoA ligase 1;Long-chain acyl-CoA synthetase 1;Acyl-CoA synthetase long-chain family member 1;Putative uncharacterized protein	Acsl1;Acsl2;Facl2	Long-chain-fatty-acid--CoA ligase 1;acyl-CoA synthetase long-chain family member 1;78 kDa protein	11	9	8	-1.34259	0.0509772	-1.4038	-1.28138	-1.46723	-1.04691	63	27	P41216;Q6GTG6	ACSL1_MOUSE;Q6GTG6_MOUSE	ENSMUST00000034046;ENSMUST00000110372	OTTMUSP00000025909;OTTMUSP00000025910;OTTMUSP00000025912	MGI:102797;MGI:102797	NP_032007	PF00501	AMP-binding	AMP-binding enzyme	GO:0000267;GO:0005624;GO:0005626;GO:0005741;GO:0005778;GO:0005789;GO:0005792;GO:0016020;GO:0016021;GO:0019867;GO:0031090;GO:0031224;GO:0031903;GO:0031966;GO:0031968;GO:0042579;GO:0042598;GO:0043226;GO:0043227;GO:0043229;GO:0043231;GO:0044422;GO:0044424;GO:0044425;GO:0044429;GO:0044432;GO:0044438;GO:0044439;GO:0044444;GO:0044446;GO:0044464;GO:0005739	cell fraction;membrane fraction;insoluble fraction;mitochondrial outer membrane;peroxisomal membrane;endoplasmic reticulum membrane;microsome;membrane;integral to membrane;outer membrane;organelle membrane;intrinsic to membrane;microbody membrane	GO:0000166;GO:0000287;GO:0001882;GO:0001883;GO:0003824;GO:0004467;GO:0005488;GO:0005524;GO:0015645;GO:0016874;GO:0016877;GO:0017076;GO:0030554;GO:0032553;GO:0032555;GO:0032559;GO:0043167;GO:0043169;GO:0046872	nucleotide binding;magnesium ion binding;nucleoside binding;purine nucleoside binding;catalytic activity;long-chain-fatty-acid-CoA ligase activity;binding;ATP binding;fatty-acid ligase activity;ligase activity;ligase activity, forming carbon-sulfur bonds	GO:0006082;GO:0006629;GO:0006631;GO:0008152;GO:0009987;GO:0019752;GO:0032787;GO:0042180;GO:0043436;GO:0044237;GO:0044238;GO:0044255	organic acid metabolic process;lipid metabolic process;fatty acid metabolic process;metabolic process;cellular process;carboxylic acid metabolic process;monocarboxylic acid metabolic process;cellular ketone metabolic process;oxoacid metabolic process	mmu:14081	ko00071;ko04920;ko03320	Fatty acid metabolism;Adipocytokine signaling pathway;PPAR signaling pathway	K01897	77.923	699
IPI00468850	IPI00468850;IPI00653743	Fumarylacetoacetate hydrolase domain-containing protein 1;Putative uncharacterized protein	Fahd1;MNCb-4134	Fumarylacetoacetate hydrolase domain-containing protein 1;fumarylacetoacetate hydrolase domain containing 1	2	2	1	-1.34064	0.0512302	-0.956339	-1.52965	-1.34051	-1.34076	21	15	Q8R0F8;Q3UQY4	FAHD1_MOUSE;Q3UQY4_MOUSE	ENSMUST00000049642		MGI:1915886;MGI:1915886	NP_075969	PF01557	FAA_hydrolase	Fumarylacetoacetate (FAA) hydrolase family	GO:0005743;GO:0016020;GO:0019866;GO:0031090;GO:0031966;GO:0044422;GO:0044424;GO:0044429;GO:0044444;GO:0044446;GO:0044464	mitochondrial inner membrane;membrane;organelle inner membrane;organelle membrane;mitochondrial membrane;organelle part;intracellular part;mitochondrial part;cytoplasmic part;intracellular organelle part;cell part	GO:0000287;GO:0003824;GO:0005488;GO:0005509;GO:0016787;GO:0043167;GO:0043169;GO:0046872	magnesium ion binding;catalytic activity;binding;calcium ion binding;hydrolase activity;ion binding;cation binding;metal ion binding	GO:0008152	metabolic process	mmu:68636				25.158	227
IPI00311236	IPI00311236;IPI00775948;IPI00673513;IPI00458337	60S ribosomal protein L7	Rpl7	60S ribosomal protein L7;Protein;similar to 60S ribosomal protein L7 isoform 2;29 kDa protein	27	26	24	-1.33867	0.0514864	-1.64745	-1.12261	-1.40123	-1.2761	33	24	P14148;Q3TK73;Q3UBI6;Q5M9N8	RL7_MOUSE	ENSMUST00000058437	OTTMUSP00000018402;OTTMUSP00000018403	MGI:98073	NP_035421;XP_902311;XP_924795	PF00327;PF08079	Ribosomal_L30;Ribosomal_L30_N	Ribosomal protein L30p/L7e;Ribosomal L30 N-terminal domain	GO:0015934;GO:0022625;GO:0030529;GO:0032991;GO:0033279;GO:0044422;GO:0044424;GO:0044444;GO:0044445;GO:0044446;GO:0044464	large ribosomal subunit;cytosolic large ribosomal subunit;ribonucleoprotein complex;macromolecular complex;ribosomal subunit;organelle part;intracellular part;cytoplasmic part;cytosolic part;intracellular organelle part;cell part	GO:0003676;GO:0003723;GO:0003735;GO:0005198;GO:0005488;GO:0030528	nucleic acid binding;RNA binding;structural constituent of ribosome;structural molecule activity;binding;transcription regulator activity	GO:0006412;GO:0008152;GO:0009058;GO:0009059;GO:0009987;GO:0019538;GO:0034645;GO:0034960;GO:0034961;GO:0043170;GO:0043283;GO:0043284;GO:0044237;GO:0044238;GO:0044249;GO:0044260;GO:0044267	translation;metabolic process;biosynthetic process;macromolecule biosynthetic process;cellular process;protein metabolic process;cellular macromolecule biosynthetic process;cellular biopolymer metabolic process;cellular biopolymer biosynthetic process	mmu:19989	ko03010	Ribosome	K02937	31.419	270
IPI00116192	IPI00116192	Thioredoxin-dependent peroxide reductase, mitochondrial;Perioredoxin-3;PRX III;Antioxidant protein 1;Protein MER5	Prdx3;Aop1;Mer5	Thioredoxin-dependent peroxide reductase, mitochondrial	6	6	5	-1.33492	0.0519766	-1.18457	-1.55751	-1.14019	-1.48527	30	36	P20108;Q8K4K8	PRDX3_MOUSE	ENSMUST00000025961	OTTMUSP00000023435	MGI:88034	NP_031478	PF10417;PF00578	1-cysPrx_C;AhpC-TSA	C-terminal domain of 1-Cys peroxiredoxin;AhpC/TSA family	GO:0005739;GO:0043226;GO:0043227;GO:0043229;GO:0043231;GO:0044424;GO:0044444;GO:0044464	mitochondrion;organelle;membrane-bounded organelle;intracellular organelle;intracellular membrane-bounded organelle;intracellular part;cytoplasmic part;cell part	GO:0003824;GO:0004601;GO:0005488;GO:0005515;GO:0016209;GO:0016491;GO:0016684;GO:0042802;GO:0051920	catalytic activity;peroxidase activity;binding;protein binding;antioxidant activity;oxidoreductase activity;oxidoreductase activity, acting on peroxide as acceptor;identical protein binding;peroxiredoxin activity	GO:0001893;GO:0002237;GO:0006950;GO:0006979;GO:0008152;GO:0009607;GO:0009987;GO:0010033;GO:0019725;GO:0030099;GO:0030154;GO:0032496;GO:0032502;GO:0042221;GO:0042592;GO:0045454;GO:0048856;GO:0048869;GO:0050789;GO:0050794;GO:0050896;GO:0055114;GO:0065007;GO:0065008	maternal placenta development;response to molecule of bacterial origin;response to stress;response to oxidative stress;metabolic process;response to biotic stimulus;cellular process;response to organic substance;cellular homeostasis	mmu:11757			K03386	28.127	257
IPI00310857	IPI00310857	Exosome complex exonuclease RRP41;Ribosomal RNA-processing protein 41;Exosome component 4	Exosc4;Rrp41	Exosome complex exonuclease RRP41	5	4	5	-1.33428	0.0520608	-1.47013	-1.2597	-1.22584	-1.40886	6	3	Q921I9;Q542B0	EXOS4_MOUSE	ENSMUST00000059045		MGI:1923576	NP_780608	PF01138;PF03725	RNase_PH;RNase_PH_C	3' exoribonuclease family, domain 1;3' exoribonuclease family, domain 2	GO:0000178;GO:0005730;GO:0005737;GO:0032991;GO:0043226;GO:0043228;GO:0043229;GO:0043232;GO:0043234;GO:0044422;GO:0044424;GO:0044428;GO:0044446;GO:0044464	exosome (RNase complex);nucleolus;cytoplasm;macromolecular complex;organelle;non-membrane-bounded organelle;intracellular organelle;intracellular non-membrane-bounded organelle;protein complex;organelle part;intracellular part;nuclear part	GO:0000175;GO:0003676;GO:0003723;GO:0003824;GO:0004518;GO:0004527;GO:0004532;GO:0004540;GO:0005488;GO:0008408;GO:0016787;GO:0016788;GO:0016796;GO:0016896	3'-5'-exoribonuclease activity;nucleic acid binding;RNA binding;catalytic activity;nuclease activity;exonuclease activity;exoribonuclease activity;ribonuclease activity;binding;3'-5' exonuclease activity;hydrolase activity	GO:0006139;GO:0006364;GO:0006396;GO:0006807;GO:0008152;GO:0009987;GO:0016070;GO:0016072;GO:0034470;GO:0034660;GO:0034960;GO:0043170;GO:0043283;GO:0044237;GO:0044238;GO:0044260	nucleobase, nucleoside, nucleotide and nucleic acid metabolic process;rRNA processing;RNA processing;nitrogen compound metabolic process;metabolic process;cellular process;RNA metabolic process;rRNA metabolic process;ncRNA processing	mmu:109075			K01149	26.249	245
IPI00880373	IPI00880373;IPI00127274;IPI00880580;IPI00882062	Pus7 protein;Putative uncharacterized protein	Pus7	Pus7 protein;Putative uncharacterized protein	3	3	1	-1.33347	0.0521675	-1.41189	-1.36742	-1.29951	-1.18818	27	15	B7ZNL8;Q3ULP8;Q3UQN6;Q69Z76;Q91VU7	B7ZNL8_MOUSE;Q3ULP8_MOUSE	ENSMUST00000072492;ENSMUST00000119946	OTTMUSP00000036009;OTTMUSP00000036007;OTTMUSP00000036008	MGI:1925947	NP_848490	PF01142	TruD	tRNA pseudouridine synthase D (TruD)			GO:0003676;GO:0003723;GO:0003824;GO:0005488;GO:0009982;GO:0016853;GO:0016866	nucleic acid binding;RNA binding;catalytic activity;binding;pseudouridine synthase activity;isomerase activity;intramolecular transferase activity	GO:0001522;GO:0006139;GO:0006396;GO:0006399;GO:0006400;GO:0006807;GO:0008033;GO:0008152;GO:0009451;GO:0009987;GO:0016070;GO:0031119;GO:0034470;GO:0034660;GO:0034960;GO:0043170;GO:0043283;GO:0043412;GO:0044237;GO:0044238;GO:0044260	pseudouridine synthesis;nucleobase, nucleoside, nucleotide and nucleic acid metabolic process;RNA processing;tRNA metabolic process;tRNA modification;nitrogen compound metabolic process;tRNA processing;metabolic process;RNA modification;cellular process	mmu:78697				75.39	666
[truncated: 2,957 more rows]
